# Supplementary material for: Synthesis of Oxidized 3β,3′β-Disteryl Ethers and Search after High-Temperature Treatment of Sterol-Rich Samples
Source: Int J Mol Sci. 2021 Sep 27;22(19):10421. doi: 10.3390/ijms221910421 (PMC8508662; doi:10.3390/ijms221910421)
Supplement: Supplementary file 1 [file ijms-22-10421-s001.zip › ijms-1391754-supplementary.pdf]

**Supplementary data**  
**Synthesis of oxidized 3 $\beta$ ,3' $\beta$ -disteryl ethers and search after high-temperature treatment of sterol-rich samples**

**Authors:** Adam Zmysłowski<sup>1</sup>, Jerzy Sitkowski<sup>1</sup>, Katarzyna Bus<sup>1</sup>, Katarzyna Michalska<sup>1</sup>, Arkadiusz Szterk<sup>2</sup>

<sup>1</sup>National Medicines Institute, 30/34 Chełmska, 00-725 Warsaw, Poland.

<sup>2</sup>Center for Translational Medicine Warsaw University for Life Sciences, Nowoursynowska 100, 02-797 Warsaw, Poland

Transfer of Science Sp. z o.o. Janiszowska 14, 02-264 Warszawa

**Correspondence:**

Adam Zmysłowski MSc, National Medicines Institute, Department of Spectrometric Methods, 30/34 Chełmska, 00-725 Warsaw, Poland

Email: a.zmyslowski@nil.gov.pl

**1.1. Chemical Synthesis**

**3 $\beta$ ,3' $\beta$ -Dicholesteryl ether (1).** The synthesis was performed as already described [4]. A solution that contained cholesterol (3.48 g, 9.0 mmol) and MK10 (2.7 g) in CH<sub>2</sub>Cl<sub>2</sub> (250 mL) was stirred at refluxing temperature until the substrate disappeared (TLC, solvent: n-Hex:EtOAc 3:1 v/v). After cooling, the catalyst was removed via filtration, and the solvent was evaporated under reduced pressure. 3 $\beta$ ,3' $\beta$ -Dicholesteryl ether was purified by crystallization (n-Hex:EtOAc 10:1 v/v) and using DCVC with n-Hex:Et<sub>2</sub>O (95:5 v/v) as a mobile phase to give the title compound (2.421 g, yield: 71%) as a white solid. The <sup>1</sup>H and <sup>13</sup>C NMR spectral data are listed in Table S8 and match the expected values [4].

**3 $\beta$ ,3' $\beta$ -Disitosteryl ether (2).** The synthesis was performed as already described [4]. A solution that contained  $\beta$ -sitosterol (3.71 g; 9.0 mmol) and MK10 (2.7 g) in CH<sub>2</sub>Cl<sub>2</sub> (250 mL) was stirred at refluxing temperature until the substrate disappeared (TLC, solvent: n-Hex:EtOAc 3:1 v/v). After cooling, the catalyst was removed via filtration, and the solvent was evaporated under reduced pressure. 3 $\beta$ ,3' $\beta$ -Disitosteryl ether was purified by crystallization (n-Hex:EtOAc 10:1 v/v) and using DCVC with n-Hex:Et<sub>2</sub>O (95:5 v/v) as a mobile phase to give the title compound (2.531 g, yield: 69%) as a white solid. The <sup>1</sup>H and <sup>13</sup>C NMR spectral data are listed in Table S9 and match the expected values [4].

**3 $\beta$ ,3' $\beta$ -Distigmasteryl ether (3).** The synthesis was performed as already described [4]. A solution that contained stigmasterol (3.73 g; 9.0 mmol) and MK10 (2.7 g) in CH<sub>2</sub>Cl<sub>2</sub> (250 mL) was stirred at refluxing temperature until the substrate disappeared (TLC, solvent: n-Hex:EtOAc 3:1 v/v). After cooling, the catalyst was removed via filtration, and the solvent was evaporated under reduced pressure. 3 $\beta$ ,3' $\beta$ -Distigmasteryl ether was purified by crystallization (n-Hex:EtOAc 10:1 v/v) and using DCVC with n-Hex:Et<sub>2</sub>O (95:5 v/v) as a mobile phase to give the title compound (2.614 g, yield: 72%) as a white solid. The <sup>1</sup>H and <sup>13</sup>C NMR spectral data are listed in Table S10 and match the expected values [4].

**Cholest-5-en-7-one-3 $\beta$ -yl-cholesterol ether (7-ketocholesteryl-cholesterol ether) (4).**

**Method I.** A solution that contained cholesterol (772 mg, 2.0 mmol), 7-ketocholesterol (**22**, 401 mg, 1.0 mmol), and MK10 (0.6 g) in CH<sub>2</sub>Cl<sub>2</sub> (120 mL) was stirred at refluxing temperature until the cholesterol disappeared (TLC, solvent: n-Hex:EtOAc 3:1 v/v). After cooling, the catalyst was removed

via filtration, and the solvent was evaporated under reduced pressure. The white crystals were purified using DCVC with n-Hex:EtOAc (15:1 v/v) as a mobile phase to give the title compound (251 mg, yield: 67%) as a white solid.

**Method II.** Chromium trioxide (CrO<sub>3</sub>) (0.50 g, 5.0 mmol) was suspended in 50 mL of dry CH<sub>2</sub>Cl<sub>2</sub> and stirred for 30 min at –20°C. 3,5-Dimethylpyrazole (481 mg, 5.0 mmol) was added in one portion, and the reaction mixture was stirred for 30 min at –20°C. 3β,3β'-Dicholesteryl ether (**1**, 755 mg, 1 mmol) was added, and the mixture was stirred at –20°C for 1 h and then allowed to warm to room temperature. The solvent was evaporated in a rotavapor and redissolved in n-Hex:EtOAc (3:1 v/v), and the brown suspension was filtered through a short pad of Celite and silica gel. The solvent was evaporated. The yellow crystals were purified by DCVC using n-Hex:EtOAc (15:1 v/v) as a mobile phase to give the title compound (431 mg, yield: 56%) as a white solid.

The <sup>1</sup>H and <sup>13</sup>C NMR spectral data are listed in Table S8 and match the expected values [4].

#### **Sitost-5-en-7-one-3β-yl-sitosterol ether (7-ketositosteryl-sitosterol ether) (**5**).**

**Method I.** A solution that contained β-sitosterol (824 mg, 2.0 mmol), 7-ketositosterol (**23**, 428 mg, 1.0 mmol), and MK10 (0.6 g) in CH<sub>2</sub>Cl<sub>2</sub> (120 mL) was stirred at refluxing temperature until β-sitosterol disappeared (TLC, solvent: n-Hex:EtOAc 3:1 v/v). After cooling, the catalyst was removed via filtration, and the solvent was evaporated under reduced pressure. The white crystals were purified using DCVC with n-Hex:EtOAc (15:1 v/v) as a mobile phase to give the title compound (264 mg, yield: 65%) as a white solid.

**Method II.** Chromium trioxide (CrO<sub>3</sub>) (0.5 g, 5.0 mmol) was suspended in 50 mL of dry CH<sub>2</sub>Cl<sub>2</sub> and stirred for 30 min at –20°C. 3,5-Dimethylpyrazole (481 mg, 5.0 mmol) was added in one portion, and the reaction mixture was stirred for 30 min at –20°C. 3β,3β'-Disitosteryl ether (**2**, 755 mg, 1 mmol) was added, and the mixture was stirred at –20°C for 1 h and then allowed to warm to room temperature. The solvent was evaporated in a rotavapor and redissolved in n-Hex:EtOAc (3:1 v/v), and the brown suspension was filtered through a short pad of Celite and silica gel. The solvent was evaporated. The yellow crystals were purified by DCVC using n-Hex:EtOAc (15:1 v/v) as a mobile phase to give the title compound (448 mg, yield: 54%) as a white solid.

The <sup>1</sup>H and <sup>13</sup>C NMR spectral data are listed in Table S9 and match the expected values [4].

#### **Stigmast-5-en-7-one-3β-yl-stigmasterol ether (7-ketostigmasteryl-stigmasterol ether) (**6**).**

**Method I.** A solution that contained stigmasterol (828 mg, 2.0 mmol), 7-ketostigmasterol (**24**, 426 mg, 1.0 mmol), and MK10 (0.6 g) in CH<sub>2</sub>Cl<sub>2</sub> (120 mL) was stirred at refluxing temperature until the stigmasterol disappeared (TLC, solvent: n-Hex:EtOAc 3:1 v/v). After cooling, the catalyst was removed via filtration, and the solvent was evaporated under reduced pressure. The white crystals were purified using DCVC with n-Hex:EtOAc (15:1 v/v) as a mobile phase to give the title compound (461 mg, yield: 56%) as a white solid.

**Method II.** Chromium trioxide (CrO<sub>3</sub>) (0.5 g, 5.0 mmol) was suspended in 50 mL of dry CH<sub>2</sub>Cl<sub>2</sub> and stirred for 30 min at –20°C. 3,5-Dimethylpyrazole (481 mg, 5.0 mmol) was added in one portion, and the reaction mixture was stirred for 30 min at –20°C. 3β,3β'-Distigmasteryl ether (**3**, 755 mg, 1 mmol) was added, and the mixture was stirred at –20°C for 1 h and then allowed to warm to room temperature. The solvent was evaporated in a rotavapor and redissolved in n-Hex:EtOAc (3:1 v/v), and the brown suspension was filtered through a short pad of Celite and silica gel. The solvent was evaporated. The yellow crystals were purified by DCVC using n-Hex:EtOAc (15:1 v/v) as a mobile phase to give the title compound (461 mg, yield: 56%) as a white solid.

The <sup>1</sup>H and <sup>13</sup>C NMR spectral data are listed in Table S10 and match the expected values [4].

**3 $\beta$ ,3' $\beta$ -Di(cholest-5-en-7-one-3 $\beta$ -yl) ether** (di(7-ketocholesteryl) ether) (**7**). Chromium trioxide (CrO<sub>3</sub>) (1.5 g, 15.0 mmol) was suspended in dry CH<sub>2</sub>Cl<sub>2</sub> and stirred for 30 min at –20°C. 3,5-Dimethylpyrazole (1.442 g, 15.0 mmol) was added in one portion, and the reaction mixture was stirred for 30 min at –20°C. 3 $\beta$ ,3 $\beta$ '-Dicholesteryl ether (**1**, 755 mg, 1 mmol) was added, and the mixture was stirred at –20°C for 1 h and then allowed to warm to room temperature. The solvent was evaporated in a rotavapor and redissolved in n-Hex:EtOAc (3:1 v/v), and the brown suspension was filtered through a short pad of Celite and silica gel. The solvent was evaporated. The yellow crystals were purified by DCVC using n-Hex:EtOAc (15:1 v/v) as a mobile phase to give the compound (621 mg, yield: 79%). The <sup>1</sup>H and <sup>13</sup>C NMR spectral data are listed in Table S11.

**3 $\beta$ ,3' $\beta$ -Di(sitost-5-en-7-one-3 $\beta$ -yl) ether** (di(7-ketositosteryl) ether) (**8**). Chromium trioxide (CrO<sub>3</sub>) (1.5 g, 15.0 mmol) was suspended in dry CH<sub>2</sub>Cl<sub>2</sub> and stirred for 30 min at –20°C. 3,5-Dimethylpyrazole (1.44 g, 15.0 mmol) was added in one portion, and the reaction mixture was stirred for 30 min at –20°C. 3 $\beta$ ,3 $\beta$ '-Disitosteryl ether (**2**, 806 mg, 1 mmol) was added, and the mixture was stirred at –20°C for 1 h and then allowed to warm to room temperature overnight. The solvent was evaporated in a rotavapor and redissolved in n-Hex:EtOAc (3:1 v/v), and the brown suspension was filtered through a short pad of Celite and silica gel. The solvent was evaporated. The yellow crystals were purified by DCVC using n-Hex:EtOAc (15:1 v/v) as a mobile phase to give the compound (608 mg, yield: 73%). The <sup>1</sup>H and <sup>13</sup>C NMR spectral data are listed in Table S11.

**3 $\beta$ ,3' $\beta$ -Di(stigmast-5-en-7-one-3 $\beta$ -yl) ether** (di(7-ketostigmasteryl) ether) (**9**). Chromium trioxide (CrO<sub>3</sub>) (1.5 g, 15.0 mmol) was suspended in dry CH<sub>2</sub>Cl<sub>2</sub> and stirred for 30 min at –20°C. 3,5-Dimethylpyrazole (1.44 g, 15.0 mmol) was added in one portion, and the reaction mixture was stirred for 30 min at –20°C. 3 $\beta$ ,3 $\beta$ '-Distigmasteryl ether (**3**, 805 mg, 1 mmol) was added, and the mixture was stirred at –20°C for 1 h and then allowed to warm to room temperature overnight. The solvent was evaporated in a rotavapor and redissolved in n-Hex:EtOAc (3:1 v/v), and the brown suspension was filtered through a short pad of Celite and silica gel. The solvent was evaporated. The yellow crystals were purified by DCVC using n-Hex:EtOAc (6:1 v/v) as a mobile phase to give the title compound (647 mg, yield: 78%) as a white solid. The <sup>1</sup>H and <sup>13</sup>C NMR spectral data are listed in Table S11.

**Cholest-5-en-3 $\beta$ ,7 $\alpha$ -diol-cholesterol ether** (7 $\alpha$ -hydroxycholesteryl-cholesterol ether) (**10**). A solution of L-Selectride (1 M in THF, 0.25 mL, 0.25 mmol) was added dropwise to a solution of 7-ketocholesteryl-cholesterol ether (**4**, 154 mg, 0.20 mmol) in THF (7.5 mL) at –78°C. The resulting mixture was stirred at –78°C for 1.5 h. Water (0.25 mL), 6 M NaOH (0.25 mL), and 30% H<sub>2</sub>O<sub>2</sub> (0.25 mL) were added successively to the reaction mixture to give a clean and transparent mixture. The dry ice was removed, and the reaction mixture was allowed to reach room temperature. Water (5 mL) was added, and the mixture was extracted with CH<sub>2</sub>Cl<sub>2</sub> (2  $\times$  10 mL) and saturated NaCl solution and then dried over anhydrous MgSO<sub>4</sub>. The resulting precipitate was filtered, washed with water and dried under reduced pressure. The crude product was purified by DCVC using n-Hex:EtOAc (15:1 v/v to 10:1 v/v) as a mobile phase to give the title compound (97 mg, yield: 63%) as a white solid. The <sup>1</sup>H and <sup>13</sup>C NMR spectral data are listed in Table S12.

**Sitost-5-en-3 $\beta$ ,7 $\alpha$ -diol-sitosterol ether** (7 $\alpha$ -hydroxysitosteryl-sitosterol ether) (**11**). A solution of L-Selectride (1 M in THF, 0.25 mL, 0.25 mmol) was added dropwise to a solution of 7-ketositosteryl-sitosterol ether (**5**, 154 mg, 0.20 mmol) in THF (7.5 mL) at –78°C. The resulting mixture was stirred at –78°C for 1.5 h. Water (0.25 mL), 6 M NaOH (0.25 mL), and 30% H<sub>2</sub>O<sub>2</sub> (0.25 mL) were added successively to the reaction mixture to give a clean and transparent mixture. The dry ice was removed, and the reaction mixture was allowed to reach room temperature. Water (5 mL) was added, and the

mixture was extracted with CH<sub>2</sub>Cl<sub>2</sub> (2 × 10 mL) and saturated NaCl solution and then dried over anhydrous MgSO<sub>4</sub>. The resulting precipitate was filtered, washed with water and dried under reduced pressure. The crude product was purified by DCVC using n-Hex:EtOAc (15:1 v/v to 10:1 v/v) as a mobile phase to give the title compound (105 mg, yield: 64%) as a white solid. The <sup>1</sup>H and <sup>13</sup>C NMR spectral data are listed in Table S12.

**Stigmast-5-en-3β,7α-diol-stigmasterol ether** (7α-hydroxystigmasteryl-stigmasterol ether) (**12**). A solution of L-Selectride (1 M in THF, 0.25 mL, 0.25 mmol) was added dropwise to a solution of 7-ketostigmasteryl-stigmasterol ether (**6**, 165 mg, 0.20 mmol) in THF (7.5 mL) at −78°C. The resulting mixture was stirred at −78°C for 1.5 h. Water (0.25 mL), 6 M NaOH (0.25 mL), and 30% H<sub>2</sub>O<sub>2</sub> (0.25 mL) were added successively to the reaction mixture to give a clean and transparent mixture. The dry ice was removed, and the reaction mixture was allowed to reach room temperature. Water (5 mL) was added, and the mixture was extracted with CH<sub>2</sub>Cl<sub>2</sub> (2 × 10 mL) and saturated NaCl solution and then dried over anhydrous MgSO<sub>4</sub>. The resulting precipitate was filtered, washed with water and dried under reduced pressure. The crude product was purified by DCVC using n-Hex:EtOAc (15:1 v/v to 10:1 v/v) as a mobile phase to give the title compound (101 mg, yield: 61%) as a white solid. The <sup>1</sup>H and <sup>13</sup>C NMR spectral data are listed in Table S12.

**Cholest-5-en-3β,7β-diol-cholesterol ether** (7β-hydroxycholesteryl-cholesterol ether) (**13**). CeCl<sub>3</sub>·7H<sub>2</sub>O (149 mg, 0.4 mmol) was dissolved in 10 mL of a mixture CH<sub>2</sub>Cl<sub>2</sub>/MeOH (1:1 v/v), and 7-ketocholesteryl-cholesterol ether (**4**, 154 mg, 0.2 mmol) in CH<sub>2</sub>Cl<sub>2</sub> (2 mL) was added at room temperature. NaBH<sub>4</sub> (15 mg, 0.4 mmol) was added in small portions. The mixture was stirred at room temperature for 15 min, hydrolysed with a 10% aqueous HCl solution (2 mL), and then extracted successively with CH<sub>2</sub>Cl<sub>2</sub> (3 × 25 mL). The organic layer was dried over MgSO<sub>4</sub>, and the solvent was removed under reduced pressure. The crude product was purified by DCVC using n-Hex:EtOAc (10:1 v/v) as a mobile phase to give the title compound (114 mg, yield: 74%) as a white solid. The <sup>1</sup>H and <sup>13</sup>C NMR spectral data are listed in Table S13.

**Sito-5-en-3β,7β-diol-sitosterol ether** (7β-hydroxysitosteryl-sitosterol ether) (**14**). CeCl<sub>3</sub>·7H<sub>2</sub>O (149 mg, 0.4 mmol) was dissolved in 10 mL of a mixture CH<sub>2</sub>Cl<sub>2</sub>/MeOH (1:1 v/v), and 7-ketositosteryl-sitosterol ether (**5**, 164 mg, 0.2 mmol) in CH<sub>2</sub>Cl<sub>2</sub> (2 mL) was added at room temperature. NaBH<sub>4</sub> (15 mg, 0.4 mmol) was added in small portions. The mixture was stirred at room temperature for 15 min, hydrolysed with a 10% aqueous HCl solution (2 mL), and then extracted successively with CH<sub>2</sub>Cl<sub>2</sub> (3 × 25 mL). The organic layer was dried over MgSO<sub>4</sub>, and the solvent was removed under reduced pressure. The crude product was purified by DCVC using n-Hex:EtOAc (10:1 v/v) as a mobile phase to give the title compound (124 mg, yield: 75%) as a white solid. The <sup>1</sup>H and <sup>13</sup>C NMR spectral data are listed in Table S13.

**Stigma-5-en-3β,7β-diol-stigmasterol ether** (7β-hydroxystigmasteryl-stigmasterol ether) (**15**). CeCl<sub>3</sub>·7H<sub>2</sub>O (149 mg, 0.4 mmol) was dissolved in 10 mL of a mixture CH<sub>2</sub>Cl<sub>2</sub>/MeOH (1:1 v/v), and 7-ketositmgatseryl-stigmasterol ether (**6**, 165 mg, 0.2 mmol) in CH<sub>2</sub>Cl<sub>2</sub> (2 mL) was added at room temperature. NaBH<sub>4</sub> (15 mg, 0.4 mmol) was added in small portions. The mixture was stirred at room temperature for 15 min, hydrolysed with a 10% aqueous HCl solution (2 mL), and then extracted successively with CH<sub>2</sub>Cl<sub>2</sub> (3 × 25 mL). The organic layer was dried over MgSO<sub>4</sub>, and the solvent was removed under reduced pressure. The crude product was purified by DCVC using n-Hex:EtOAc (10:1 v/v) as a mobile phase to give the title compound (119 mg, yield: 72%) as a white solid. The <sup>1</sup>H and <sup>13</sup>C NMR spectral data are listed in Table S13.

**(5,6 $\alpha$ -epoxycholesteryl)-cholesterol ether (16).** To a solution of 3 $\beta$ ,3 $\beta'$ -dicholesteryl ether (**1**, 378 mg, 0.5 mmol) in 100 mL CH<sub>2</sub>Cl<sub>2</sub> at 0°C, a solution of mCPBA (149 mg, 0.6 mmol) in 10 mL CH<sub>2</sub>Cl<sub>2</sub> was added and mixed for 4 h at 0°C. The reaction progression was checked by TLC (10:1 v/v n-Hex:EtOAc). After 4 h at 0°C, the reaction was quenched with sat. aq K<sub>2</sub>CO<sub>3</sub> (100 mL), and the aqueous layer was extracted with CH<sub>2</sub>Cl<sub>2</sub>. The combined organic layers were dried over anhydrous Na<sub>2</sub>SO<sub>4</sub>, and the solvent was evaporated under reduced pressure. The crude product was purified by DCVC using n-Hex:Et<sub>2</sub>O (95:5 v/v) as a mobile phase to give the title compound (201 mg, yield: 52%) as a white solid. The <sup>1</sup>H and <sup>13</sup>C NMR spectral data are listed in Table S14.

**(5,6 $\alpha$ -epoxysitosteryl)-sitosterol ether (17).** To a solution of 3 $\beta$ ,3 $\beta'$ -disitosteryl ether (**2**, 402 mg, 0.5 mmol) in 100 mL CH<sub>2</sub>Cl<sub>2</sub> at 0°C, a solution of mCPBA (149 mg, 0.6 mmol) in 10 mL CH<sub>2</sub>Cl<sub>2</sub> was added and mixed for 4 h at 0°C. The reaction progression was checked by TLC (10:1 v/v n-Hex:EtOAc). After 4 h at 0°C, the reaction was quenched with sat. aq K<sub>2</sub>CO<sub>3</sub> (100 mL), and the aqueous layer was extracted with CH<sub>2</sub>Cl<sub>2</sub>. The combined organic layers were dried over anhydrous Na<sub>2</sub>SO<sub>4</sub>, and the solvent was evaporated under reduced pressure. The crude product was purified by DCVC using n-Hex:Et<sub>2</sub>O (95:5 v/v) as a mobile phase to give the title compound (211 mg, yield: 51%) as a white solid. The <sup>1</sup>H and <sup>13</sup>C NMR spectral data are listed in Table S14.

**(5,6 $\alpha$ -epoxysitgmasteryl)-stigmasterol ether (18).** To a solution of 3 $\beta$ ,3 $\beta'$ -distigmasteryl ether (**3**, 403 mg, 0.5 mmol) in CH<sub>2</sub>Cl<sub>2</sub> at 0°C, a solution of mCPBA (149 mg, 0.6 mmol) in 10 mL CH<sub>2</sub>Cl<sub>2</sub> was added dropwise and mixed for 4 h at 0°C. The reaction progression was checked by TLC (10:1 v/v n-Hex:EtOAc). After 4 h at 0°C, the reaction was quenched with sat. aq K<sub>2</sub>CO<sub>3</sub> (100 mL), and the aqueous layer was extracted with CH<sub>2</sub>Cl<sub>2</sub>. The combined organic layers were dried over anhydrous Na<sub>2</sub>SO<sub>4</sub>, and the solvent was evaporated under reduced pressure. The crude product was purified by DCVC using n-Hex:Et<sub>2</sub>O (95:5 v/v) as a mobile phase to give the title compound (221 mg, yield: 54%) as a white solid. The <sup>1</sup>H and <sup>13</sup>C NMR spectral data are listed in Table S14.

**(5,6 $\beta$ -epoxycholesteryl)-cholesterol ether (19).** To a solution of 3 $\beta$ ,3 $\beta'$ -dicholesteryl ether (**1**, 378 mg, 0.5 mmol) in 15 mL CH<sub>2</sub>Cl<sub>2</sub> and 15 mL *t*-BuOH, Cu(MnO<sub>4</sub>)<sub>2</sub> (182 mg, 0.6 mmol) was added and stirred for 1 h. The reaction progression was checked by TLC (n-Hex:EtOAc 10:1 v/v). After the reaction, the mixture was added to 50 mL of n-Hex, filtered through a short silica pad and rinsed with n-Hex:EtOAc 3:1 (v/v). The solvent was evaporated, and the crude product was purified by DCVC using n-Hex:Et<sub>2</sub>O (95:5 v/v) as a mobile phase to give the title compound (231 mg, yield: 60%) as a white solid. The <sup>1</sup>H and <sup>13</sup>C NMR spectral data are listed in Table S15.

**(5,6 $\beta$ -epoxysitosteryl)-sitosterol ether (20).** To a solution of 3 $\beta$ ,3 $\beta'$ -disitosteryl ether (**2**, 402 mg, 0.5 mmol) of 15 mL CH<sub>2</sub>Cl<sub>2</sub> and 15 mL *t*-BuOH, Cu(MnO<sub>4</sub>)<sub>2</sub> (182 mg, 0.6 mmol) was added and stirred for 1 h. The reaction progression was checked by TLC (n-Hex:EtOAc 10:1 v/v). After the reaction, the mixture was added to 50 mL of n-Hex, filtered through a short silica pad and rinsed with n-Hex:EtOAc 3:1 (v/v). The solvent was evaporated, and the crude product was purified by DCVC using n-Hex:Et<sub>2</sub>O (95:5 v/v) as a mobile phase to give the title compound (257 mg, yield: 63%) as a white solid. The <sup>1</sup>H and <sup>13</sup>C NMR spectral data are listed in Table S15.

**(5,6 $\beta$ -epoxystigmasteryl)-stigmasterol ether (21).** To a solution of 3 $\beta$ ,3 $\beta'$ -distigmasteryl ether (**3**, 403 mg, 0.5 mmol) in 15 mL CH<sub>2</sub>Cl<sub>2</sub> and 15 mL *t*-BuOH, Cu(MnO<sub>4</sub>)<sub>2</sub> (182 mg, 0.6 mmol) was added and stirred for 1 h. The reaction progression was checked by TLC (n-Hex:EtOAc 10:1 v/v). After the reaction, the mixture was added to 50 mL of n-Hex, filtered through a short silica pad and rinsed with n-Hex:EtOAc 3:1 (v/v). The solvent was evaporated, and the crude product was purified by DCVC

using n-Hex:Et<sub>2</sub>O (95:5 v/v) as a mobile phase to give the title compound (261 mg, yield: 64%) as a white solid. The <sup>1</sup>H and <sup>13</sup>C NMR spectral data are listed in Table S15.

**Cholest-5-en-3 $\beta$ -yl acetate** (Cholesteryl acetate) (**22**). Pyridine (593 mg, 7.5 mmol) and a solution of acetyl chloride (393 mg, 5.0 mmol) in CH<sub>2</sub>Cl<sub>2</sub> (4 mL) were added to a solution of cholesterol (1.93 g, 5.0 mmol) in CH<sub>2</sub>Cl<sub>2</sub> (40 mL). The reaction mixture was stirred at room temperature for 1 h. Water (10 mL) was added to the residue, and the mixture was extracted with CH<sub>2</sub>Cl<sub>2</sub> (3  $\times$  50 mL). The organic layer was washed sequentially with a 10% aqueous HCl solution (50 mL) of brine, dried over MgSO<sub>4</sub>, and filtered. The filtrate was evaporated off, and the crude product was purified using DCVC with a mixture of n-Hex:EtOAc (6:1 v/v) as the mobile phase to give the title compound (1.964 g, yield: 92%) as a white solid. NMR data matched expected values [18]. <sup>1</sup>H NMR (500 MHz, CDCl<sub>3</sub>,  $\delta$  ppm): 0.67 (s, 3H, -CH<sub>3</sub>), 0.87 (m, 3H, -CH<sub>3</sub>), 0.92 (d, 3H,  $J$  = 6.5 Hz, -CH<sub>3</sub>), 1.01 (s, 3H, -CH<sub>3</sub>), 2.05 (s, 3H, -CH<sub>3</sub>), 2.32 (d,  $J$  = 7.0 Hz, 2H), 4.61 (m, 1H), 5.37 (s, 1H, =CH-), 1.06–2.53 (29H, methyl- and methylene- of steroid structure). <sup>13</sup>C NMR (125 MHz, CDCl<sub>3</sub>,  $\delta$  ppm): 170.50 (C=O), 139.63, 122.63, 73.97, 56.67, 56.13, 50.02, 42.30, 39.72, 39.51, 38.11, 36.98, 36.58, 36.17, 35.78, 31.88, 31.84, 28.22, 28.00, 27.76, 24.27, 23.81, 22.81, 22.55, 21.42, 21.02, 19.29, 18.70, 11.84.

**Sitost-5-en-3 $\beta$ -yl acetate** ( $\beta$ -Sitosteryl acetate) (**23**). Pyridine (593 mg, 7.5 mmol) and a solution of acetyl chloride (393 mg, 5.0 mmol) in CH<sub>2</sub>Cl<sub>2</sub> (4 mL) were added to a solution of  $\beta$ -sitosterol (2.08 g, 5.0 mmol) in CH<sub>2</sub>Cl<sub>2</sub> (40 mL). The reaction mixture was stirred at room temperature for 1 h. Water (10 mL) was added to the residue, and the mixture was extracted with CH<sub>2</sub>Cl<sub>2</sub> (3  $\times$  50 mL). The organic layer was washed sequentially with a 10% aqueous HCl solution (50 mL) of brine, dried over MgSO<sub>4</sub>, and filtered. The filtrate was evaporated off, and the crude product was purified using DCVC with a mixture of n-Hex:EtOAc (6:1 v/v) as the mobile phase to give the title compound (2.078 g, yield: 91%) as a white solid. NMR data matched expected values [18]. <sup>1</sup>H NMR (500 MHz, CDCl<sub>3</sub>,  $\delta$  ppm) 5.38 (m, 1H), 4.60 (m, 1H), 2.32 (m, 2H), 2.03(s, 3H), 1.02 (s, 3H), 0.93 (d,  $J$  = 6.5 Hz, 3H), 0.85 (t,  $J$  = 7.3 Hz, 3H), 0.83 (d,  $J$  = 6.8 Hz, 3H), 0.81 (d,  $J$  = 6.8 Hz, 3H), 0.68 (s, 3H). <sup>13</sup>C NMR (125 MHz, CDCl<sub>3</sub>,  $\delta$  ppm) 170.51, 139.64, 122.63, 73.97, 56.68, 56.03, 50.03, 45.83, 42.30, 39.71, 38.11, 36.99, 36.58, 36.14, 33.93, 31.89, 31.85, 29.14, 28.23, 27.76, 26.07, 24.28, 23.06, 21.42, 21.02, 19.81, 19.30, 19.03, 18.77, 11.97, 11.84.

**Stigmast-5-en-3 $\beta$ -yl acetate** (Stigmasteryl acetate) (**24**). Pyridine (593 mg, 7.5 mmol) and a solution of acetyl chloride (393 mg, 5.0 mmol) in CH<sub>2</sub>Cl<sub>2</sub> (4 mL) were added to a solution of stigmasterol (2.07 g, 5.0 mmol) in CH<sub>2</sub>Cl<sub>2</sub> (40 mL). The reaction mixture was stirred at room temperature for 1 h. Water (10 mL) was added to the residue, and the mixture was extracted with CH<sub>2</sub>Cl<sub>2</sub> (3  $\times$  50 mL). The organic layer was washed sequentially with a 10% aqueous HCl solution (50 mL) of brine, dried over MgSO<sub>4</sub>, and filtered. The filtrate was evaporated off, and the crude product was purified using DCVC with a mixture of n-Hex:EtOAc (6:1 v/v) as the mobile phase to give the title compound (2.116 g, yield: 93%) as a white solid. NMR data matched expected values [19]. <sup>1</sup>H NMR (500 MHz, CDCl<sub>3</sub>,  $\delta$  ppm) 5.38 (bd,  $J$  = 5.0 Hz, 1H), 5.15 (dd,  $J$  = 15.2, 8.6 Hz, 1H), 5.01 (dd,  $J$  = 15.2, 8.7 Hz, 1H), 4.61 (m, 1H), 2.33 (bs, 1H), 2.31 (bs, 1H), 2.07–1.92 (m, 3H), 2.03 (s, 3H), 1.88–1.83 (m, 2H), 1.75–1.64 (m, 1H), 1.63–1.36 (m, 9H), 1.30–0.90 (m, 8H), 1.02 (d,  $J$  = 6.6 Hz, 3H), 1.02 (s, 3H), 0.85 (d,  $J$  = 6.5 Hz, 3H), 0.81 (t,  $J$  = 7.4 Hz, 3H), 0.80 (d,  $J$  = 6.4 Hz, 3H), 0.70 (s, 3H). <sup>13</sup>C NMR (125 MHz, CDCl<sub>3</sub>,  $\delta$  ppm) 170.50, 139.64, 138.30, 129.27, 122.62, 73.96, 56.77, 55.93, 51.22, 50.04, 42.20, 40.48, 39.62, 38.11, 36.99, 36.59, 31.87, 31.85, 28.90, 27.76, 25.39, 24.34, 21.42, 21.21, 21.07, 21.00, 19.30, 18.97, 12.23, 12.03.

**Cholest-5-en-7-one-3 $\beta$ -yl acetate** (7-ketocholesterol acetate) (**25**). Chromium trioxide (CrO<sub>3</sub>) (3.75 g, 37.5 mmol) was suspended in 150 mL of dry CH<sub>2</sub>Cl<sub>2</sub> and stirred for 30 min at –20°C. 3,5-Dimethylpyrazole (3.61 g, 37.55 mmol) was added in one portion, and the reaction mixture was stirred for 30 min at –20°C. Cholesteryl acetate (**28**, 1.07 g, 2.50 mmol) was added, and the mixture was stirred at –20°C for 2 h and allowed to warm to room temperature. The solvent was evaporated in a rotavapor and redissolved in CH<sub>2</sub>Cl<sub>2</sub>, 100 mL of n-Hex:EtOAc (3:1 v/v) was added, and the brown suspension was filtered through a short pad of Celite and silica gel. The solvent was evaporated. The yellow crystals were purified by DCVC using n-Hex:EtOAc (6:1 v/v) as a mobile phase to give the compound (698 mg, yield: 63%). The <sup>1</sup>H and <sup>13</sup>C NMR spectral data matched the expected values [20]. <sup>1</sup>H NMR (500 MHz, CDCl<sub>3</sub>,  $\delta$  ppm) 5.70 (d,  $J$  = 1.6 Hz, 1H), 4.71 (m, 1H), 2.60-2.35 (m, 3H), 2.22 (br t,  $J$  = 9.0 Hz, 1H), 2.07-1.82 (m, 4H), 2.04 (s, 3H), 1.71-1.47 (m, 5H), 1.40-0.99 (m, 13H), 1.20 (s, 3H), 0.91 (d,  $J$  = 6.5 Hz, 3H), 0.87 (d,  $J$  = 6.6 Hz, 3H), 0.85 (d,  $J$  = 6.6 Hz, 3H), 0.68 (s, 3H). <sup>13</sup>C NMR (125 MHz, CDCl<sub>3</sub>,  $\delta$  ppm) 201.91, 170.26, 163.81, 126.70, 72.19, 54.77, 49.94, 49.80, 45.40, 43.10, 39.46, 38.65, 38.30, 37.73, 36.16, 35.7, 28.52, 27.98, 27.34, 26.29, 23.81, 22.79, 22.54, 21.24, 21.16, 18.85, 17.25, 11.96.

**Sitost-5-en-7-one-3 $\beta$ -yl acetate** (7-ketositosteryl acetate) (**26**). Chromium trioxide (CrO<sub>3</sub>) (3.75 g, 37.5 mmol) was suspended in 150 mL of dry CH<sub>2</sub>Cl<sub>2</sub> and stirred for 30 min at –20°C. 3,5-Dimethylpyrazole (3.61 g, 37.55 mmol) was added in one portion, and the reaction mixture was stirred for 30 min at –20°C.  $\beta$ -Sitosteryl acetate (**29**, 1.14 g, 2.50 mmol) was added, and the mixture was stirred at –20°C for 2 h and allowed to warm to room temperature. The solvent was evaporated in a rotavapor and redissolved in CH<sub>2</sub>Cl<sub>2</sub>, 100 mL of n-Hex:EtOAc (3:1 v/v) was added, and the brown suspension was filtered through a short pad of Celite and silica gel. The solvent was evaporated. The yellow crystals were purified by DCVC using n-Hex:EtOAc (6:1 v/v) as a mobile phase to give the compound (710 mg, yield: 60%). The <sup>1</sup>H and <sup>13</sup>C NMR spectral data matched the expected values [21]. <sup>1</sup>H NMR (500 MHz, CDCl<sub>3</sub>,  $\delta$  ppm) 5.70 (bd,  $J$  = 1.7 Hz, 1H), 4.72 (m, 1H), 2.60-2.35 (m, 3H), 2.23 (br t,  $J$  = 9.0 Hz, 1H), 2.05-1.85 (m, 3H), 2.05 (s, 3H), 1.75–1.45 (m, 6H), 1.40–0.95 (m, 14H), 1.21 (s, 3H), 0.93 (d,  $J$  = 6.6 Hz, 3H), 0.85 (t,  $J$  = 7.5 Hz, 3H), 0.83 (d,  $J$  = 6.7 Hz, 3H), 0.81 (d,  $J$  = 6.7 Hz, 3H), 0.69 (s, 3H). <sup>13</sup>C NMR (125 MHz, CDCl<sub>3</sub>,  $\delta$  ppm) 201.93, 170.26, 163.81, 126.70, 72.20, 54.67, 49.94, 49.80, 45.81, 45.41, 43.10, 38.64, 38.30, 37.73, 36.08, 35.99, 33.92, 29.11, 28.54, 27.35, 26.30, 26.07, 23.04, 21.24, 21.16, 19.78, 19.03, 18.91, 17.24, 11.96 (x2).

**Stigmast-5-en-7-one-3 $\beta$ -yl acetate** (7-ketostigmasteryl acetate) (**27**). Chromium trioxide (CrO<sub>3</sub>) (3.75 g, 37.5 mmol) was suspended in 150 mL of dry CH<sub>2</sub>Cl<sub>2</sub> and stirred for 30 min at –20°C. 3,5-Dimethylpyrazole (3.61 g, 37.55 mmol) was added in one portion, and the reaction mixture was stirred for 30 min at –20°C. Stigmasteryl acetate (**30**, 1.14 g, 2.50 mmol) was added, and the mixture was stirred at –20°C for 2 h and allowed to warm to room temperature. The solvent was evaporated in a rotavapor and redissolved in CH<sub>2</sub>Cl<sub>2</sub>, 100 mL of n-Hex:EtOAc (3:1 v/v) was added, and the brown suspension was filtered through a short pad of Celite and silica gel. The solvent was evaporated. The yellow crystals were purified by DCVC using n-Hex:EtOAc (6:1 v/v) as a mobile phase to give the compound (725 mg, yield: 61%). The <sup>1</sup>H and <sup>13</sup>C NMR spectral data matched the expected values [20]. <sup>1</sup>H NMR (500 MHz, CDCl<sub>3</sub>,  $\delta$  ppm) 5.70 (d,  $J$  = 1.5 Hz, 1H), 5.18 (dd,  $J$  = 15.0 Hz,  $J$  = 8.5 Hz, 1H), 5.03 (dd,  $J$  = 15.0 Hz,  $J$  = 8.5 Hz, 1H), 4.72 (m, 1H), 2.55 (m, 1H), 2.47 (m, 1H), 2.38 (m, 1H), 2.10-1.92 (m, 4H), 2.05 (s, 3H), 1.83-1.48 (m, 8H), 1.47-1.10 (m, 13H), 1.21 (s, 3H), 1.04 (d,  $J$  = 6.7 Hz, 3H), 0.86 (d,  $J$  = 6.5 Hz, 3H), 0.81 (t,  $J$  = 7.3 Hz, 3H), 0.80 (d,  $J$  = 6.5 Hz, 3H), 0.70 (s, 3H). <sup>13</sup>C NMR (125 MHz, CDCl<sub>3</sub>,  $\delta$  ppm) 201.83, 170.26, 163.79, 138.06, 129.48, 126.68, 72.20, 54.67, 51.19, 50.01, 49.81, 45.39, 42.99, 40.23, 38.53, 38.31, 37.74, 36.00, 31.87, 29.02, 27.35, 26.38, 25.35, 21.40, 21.24, 21.14, 21.04, 18.99, 17.24, 12.23, 12.18.

**5-Cholesten-3 $\beta$ -ol-7-one** (7-ketocholesterol) (**28**). Na<sub>2</sub>CO<sub>3</sub> (318 mg, 3.0 mmol) was added at RT to a stirred solution of cholest-5-en-7-one-3 $\beta$ -yl acetate (**31**, 665 mg, 1.5 mmol) in 100 mL MeOH/H<sub>2</sub>O (9:1 v/v). The resulting mixture was stirred at RT for 15 h. The organic solvents were evaporated, and the residue was diluted with water and extracted with EtOAc. The organic layer was washed with water and brine, dried over Na<sub>2</sub>SO<sub>4</sub> and concentrated *in vacuo*. The resulting white solid was purified by DCVC using n-Hex:EtOAc (3:1 v/v) as a mobile phase to give the compound (458 mg, yield: 76%). The <sup>1</sup>H and <sup>13</sup>C NMR spectral data matched the expected values [22] and are listed in Table S1.

**5-Sitosten-3 $\beta$ -ol-7-one** (7-ketositosterol) (**29**). Na<sub>2</sub>CO<sub>3</sub> (318 mg, 3.0 mmol) was added at RT to a stirred solution of sitost-5-en-7-one-3 $\beta$ -yl acetate (**32**, 705 mg, 1.5 mmol) in 100 mL MeOH/H<sub>2</sub>O (9:1 v/v). The resulting mixture was stirred at RT for 15 h. The organic solvents were evaporated, and the residue was diluted with water and extracted with EtOAc. The organic layer was washed with water and brine, dried over Na<sub>2</sub>SO<sub>4</sub> and concentrated *in vacuo*. The resulting white solid was purified by DCVC using n-Hex:EtOAc (3:1 v/v) as a mobile phase to give the compound (486 mg, yield: 75%). The <sup>1</sup>H and <sup>13</sup>C NMR spectral data matched the expected values [21] and are listed in Table S2.

**5-Stigmasten-3 $\beta$ -ol-7-one** (7-ketostigmasterol) (**30**). Na<sub>2</sub>CO<sub>3</sub> (318 mg, 3.0 mmol) was added at RT to a stirred solution of stigmast-5-en-7-one-3 $\beta$ -yl acetate (**33**, 705 mg, 1.5 mmol) in 100 mL MeOH/H<sub>2</sub>O (9:1 v/v). The resulting mixture was stirred at RT for 15 h. The organic solvents were evaporated, and the residue was diluted with water and extracted with EtOAc. The organic layer was washed with water and brine, dried over Na<sub>2</sub>SO<sub>4</sub> and concentrated *in vacuo*. The resulting white solid was purified by DCVC using n-Hex:EtOAc (3:1 v/v) as a mobile phase to give the compound (508 mg, yield: 79%). The <sup>1</sup>H and <sup>13</sup>C NMR spectral data matched the expected values [20] and are listed in Table S2.

**Cholesta-3,5-diene** (cholestadiene) (**31**). Zinc(II) sulfate (180 mg, 1.0 mmol) was added to cholesterol (965 mg, 2.50 mmol), and the mixture was ground together into a fine powder with a mortar and pestle and transferred to a vial, which was sealed with a rubber stopper. The reaction was conducted at 220°C for 2 h. After the reaction, the product was dissolved in n-Hex and purified by DCVC using n-Hex as a mobile phase to give the compound (426 mg, yield: 46%). The <sup>1</sup>H and <sup>13</sup>C NMR spectral data are listed in Table S1. The product was a mixture of the isomers of cholesta-2,4-diene and cholesta-3,5-diene in a ratio, and because of an inability to resolve isomers, it was used as is.

Table S1. Mass spectrometry parameters during the analysis of the oxidized 3 $\beta$ ,3' $\beta$ -dicholesteryl ethers.

| Compound                                                                             | SIM            | fragmentor | Cell<br>accelerator<br>Voltage | Capillary<br>Voltage<br>[V] | Corona<br>Current<br>[ $\mu$ A] | Nebulizer |
|--------------------------------------------------------------------------------------|----------------|------------|--------------------------------|-----------------------------|---------------------------------|-----------|
| di-(7-ketocholesteryl) ether<br>di(7-kCh) ( <b>7</b> )                               | 784.0<br>383.3 | 120        | 1                              | 6000                        | 2                               | 40        |
| 7 $\alpha$ -hydroxycholesteryl-cholesterol ether<br>7 $\alpha$ -hCh-Ch ( <b>13</b> ) | 369.4<br>385.3 | 80         | 2                              | 5400                        | 2                               | 30        |
| 7 $\beta$ -hydroxycholesteryl-cholesterol ether<br>7 $\beta$ -hCh-Ch ( <b>10</b> )   | 385.3<br>770.0 | 120        | 3                              | 6000                        | 2                               | 30        |
| 7-ketocholesteryl-cholesterol ether<br>7-kCh-Ch ( <b>4</b> )                         | 822.0          | 120        | 2                              | 6000                        | 2                               | 30        |
| 7-ketositgmasteryl-stigmasterol ether (IS)<br>7-kStig-Stig ( <b>6</b> )              | 369.4<br>403.3 | 80         | 2                              | 5400                        | 2                               | 30        |
| 5,6 $\alpha$ -epoxycholesteryl-cholesterol ether<br>5,6 $\alpha$ -epoxyCh-Ch ( )     |                |            |                                |                             |                                 |           |
| 5,6 $\beta$ -epoxycholesteryl-cholesterol ether<br>5,6 $\beta$ -epoxyCh-Ch           |                |            |                                |                             |                                 |           |



Table S2. Mass spectrometry parameters during the analysis of the oxidized 3 $\beta$ ,3' $\beta$ -disitosteryl ethers and 3 $\beta$ ,3' $\beta$ -distigmasteryl ethers.

| Compound                                                                                | SIM            | fragmentor | Cell<br>accelerator<br>Voltage | Capillary<br>Voltage<br>[V] | Corona<br>Current<br>[ $\mu$ A] | Nebulizer |
|-----------------------------------------------------------------------------------------|----------------|------------|--------------------------------|-----------------------------|---------------------------------|-----------|
| di-(7-ketositosteryl) ether<br>di(7-kSito) (8)                                          | 840.1<br>411.5 | 120        | 1                              | 6000                        | 2                               | 40        |
| di-(7-ketostigmasteryl) ether<br>di(7-kStig) (9)                                        | 836.1<br>409.4 | 120        | 1                              | 6000                        | 2                               | 40        |
| 7 $\alpha$ -hydroxysitosteryl-sitosterol ether<br>7 $\alpha$ -hSito-Sito (11)           | 397.6<br>413.6 | 80         | 2                              | 5400                        | 2                               | 30        |
| 7 $\beta$ -hydroxysitosteryl-sitosterol ether<br>7 $\beta$ -hSito-Sito (14)             |                |            |                                |                             |                                 |           |
| 7 $\alpha$ -hydroxystigmasteryl-stigmasterol ether<br>7 $\alpha$ -hStig-Stig (12)       | 395.4<br>411.4 | 80         | 2                              | 5400                        | 2                               | 30        |
| 7 $\beta$ -hydroxystigmasteryl-stigmasterol ether<br>7 $\beta$ -hStig-Stig (15)         |                |            |                                |                             |                                 |           |
| 7-ketositosteryl-sitosterol ether<br>7-kSito-Sito (5)                                   | 826.3<br>429.9 | 120        | 2                              | 5400                        | 2                               | 30        |
| 7-ketostigmasteryl-stigmasterol ether<br>7-kStig-Stig (6)                               | 822.3<br>427.8 | 120        | 2                              | 5400                        | 2                               | 30        |
| 7-ketocholesteryl-cholesterol ether (IS)<br>7-kCh-Ch (4)                                | 770.0          | 120        | 3                              | 5400                        | 2                               | 30        |
| 5,6 $\alpha$ -epoxysitosteryl-sitosterol ether<br>5,6 $\alpha$ -epoxySito-Sito (23)     | 397.6<br>413.6 | 120        | 2                              | 5400                        | 2                               | 30        |
| 5,6 $\beta$ -epoxysitosteryl-sitosterol ether<br>5,6 $\beta$ -epoxySito-Sito (26)       |                |            |                                |                             |                                 |           |
| 5,6 $\alpha$ -epoxystigmasteryl-stigmasterol ether<br>5,6 $\alpha$ -epoxyStig-Stig (24) | 395.4<br>411.4 | 120        | 2                              | 5400                        | 2                               | 30        |
| 5,6 $\beta$ -epoxystigmasteryl-stigmasterol ether<br>5,6 $\beta$ -epoxyStig-Stig (27)   |                |            |                                |                             |                                 |           |

Table S3. Instrumental conditions of ICP-MS.

| Parameter                        | Value                                        |
|----------------------------------|----------------------------------------------|
| RF Power                         | 1550 W                                       |
| Plasma argon flow rate           | 15 L/min                                     |
| Auxiliary argon flow rate        | 0.9 L/min                                    |
| Nebulizer argon flow rate        | 1.07 L/min                                   |
| Cell gas flow rate               | 4.3 mL/min                                   |
| Dwell time                       | 0.3 s                                        |
| Sweeps                           | 100                                          |
| Number of readings per replicate | 3                                            |
| Conditions                       | Oxide 156/140 and doubly charged 70/140 < 2% |

Table S4. Measurements of metal content in MK10, butter, cod liver oil, rapeseed oil and corn oil.

| Montmorillonite<br>K 10 (MK10) |              |      | Butter            |                |  |               |  | Cod-liver oil  |  | Rapeseed oil   |     | Corn Oil |  |
|--------------------------------|--------------|------|-------------------|----------------|--|---------------|--|----------------|--|----------------|-----|----------|--|
|                                | Mean±SD      | Unit |                   | Mean±SD        |  | Mean±SD       |  | Mean           |  | Mean           |     | Unit     |  |
| <sup>7</sup> Li                | 12.86±0.40   | ppm  | <sup>7</sup> Li   | 305.66±48.80   |  | 27.06±7.55    |  | 145.32±57.19   |  | 425.44±1.58    |     |          |  |
| <sup>9</sup> Be                | 447.48±70.85 | ppb  | <sup>9</sup> Be   | < LOD          |  | < LOD         |  | < LOD          |  | < LOD          |     |          |  |
| <sup>11</sup> B                | 9.10±0.57    | ppm  | <sup>11</sup> B   | 381.75±23.55   |  | 341.66±19.89  |  | 171.27±2.90    |  | 1223.11±643.62 |     |          |  |
| <sup>23</sup> Na*              | 787.75±61.59 | ppm  | <sup>23</sup> Na  | 1148.37±106.16 |  | 488.13±304.06 |  | 690.11±40.84   |  | 2115.85±282.39 |     |          |  |
| <sup>24</sup> Mg               | 0.551±0.017  | %    | <sup>24</sup> Mg  | 493.36±34.57   |  | 57.38±9.01    |  | 7060.31±367.03 |  | 1537.64±80.22  |     |          |  |
| <sup>27</sup> Al               | 4.13±0.13    | %    | <sup>27</sup> Al  | 153.30±2.99    |  | 211.62±165.91 |  | 71.28±14.35    |  | 376.46±168.09  |     |          |  |
| <sup>39</sup> K*               | 650.91±45.64 | ppm  | <sup>39</sup> K   | 3587.17±305.75 |  | 426.50±198.59 |  | 790.99±89.71   |  | 1226.52±65.68  |     |          |  |
| <sup>43</sup> Ca*              | 0.12±0.03    | %    | <sup>43</sup> Ca  | 594.33±46.84   |  | 54.93±14.67   |  | 3952.15±232.37 |  | 250.96±53.63   |     |          |  |
| <sup>51</sup> V                | 23.69±0.82   | ppm  | <sup>51</sup> V   | 12.87±0.06     |  | 63.99±34.80   |  | 55.28±55.48    |  | 0.61±0.03      |     |          |  |
| <sup>52</sup> Cr               | 17.76±0.72   | ppm  | <sup>52</sup> Cr  | 3.95±1.25      |  | 1.34±0.08     |  | 10.59±6.75     |  | 5.25±1.99      |     |          |  |
| <sup>55</sup> Mn               | 36.10±1.25   | ppm  | <sup>55</sup> Mn  | 2.09±0.50      |  | 1.31±0.21     |  | 330.43±23.45   |  | 16.98±0.95     |     |          |  |
| <sup>56</sup> Fe               | 1.23±0.02    | %    | <sup>56</sup> Fe  | 76.84±0.90     |  | 74.78±40.91   |  | 390.40±147.33  |  | 271.26±2.51    |     |          |  |
| <sup>59</sup> Co               | 849.47±52.82 | ppb  | <sup>59</sup> Co  | 1.14±0.48      |  | 0.36±0.19     |  | 0.39±0.05      |  | 0.52±0.12      |     |          |  |
| <sup>60</sup> Ni               | 3.66±0.35    | ppm  | <sup>60</sup> Ni  | 30.29±15.72    |  | 7.30±6.10     |  | 6.83±2.23      |  | 24.68±17.28    |     |          |  |
| <sup>63</sup> Cu               | 1.79±0.13    | ppm  | <sup>63</sup> Cu  | 25.40±0.38     |  | 28.89±5.24    |  | 69.09±2.16     |  | 103.82±31.27   |     |          |  |
| <sup>66</sup> Zn               | 1.24±0.43    | ppm  | <sup>66</sup> Zn  | 175.47±16.00   |  | 41.12±34.45   |  | 307.25±38.22   |  | 117.95±55.34   |     |          |  |
| <sup>71</sup> Ga               | 11.72±0.37   | ppm  | <sup>71</sup> Ga  | 0.28±0.17      |  | 0.17±0.06     |  | 0.12±0.05      |  | 0.35±0.01      |     |          |  |
| <sup>75</sup> As               | 4.46±0.21    | ppb  | <sup>75</sup> As  | 0.86±0.41      |  | 0.37±0.33     |  | 0.72±0.23      |  | 1.03±0.49      |     |          |  |
| <sup>78</sup> Se               | < LOD        | ppb  | <sup>78</sup> Se  | 2.55±1.16      |  | 3.08±0.08     |  | 2.70±1.04      |  | 2.29±0.25      |     |          |  |
| <sup>85</sup> Rb               | 40.26±1.42   | ppm  | <sup>85</sup> Rb  | 3.05±0.22      |  | 0.22±0.17     |  | 0.65±0.10      |  | 0.71±0.14      |     |          |  |
| <sup>88</sup> Sr               | 15.12±0.53   | ppm  | <sup>88</sup> Sr  | 5.82±1.74      |  | 5.01±1.63     |  | 150.99±11.05   |  | 16.95±1.61     |     |          |  |
| <sup>95</sup> Mo               | 304.68±40.12 | ppb  | <sup>95</sup> Mo  | 3.00±1.28      |  | 0.55±0.08     |  | 0.98±0.34      |  | 2.65±1.91      |     |          |  |
| <sup>101</sup> Ru              | < LOD        | ppb  | <sup>101</sup> Ru | 0.26±0.10      |  | 0.06±0.04     |  | 0.03±0.00      |  | 0.11±0.02      |     |          |  |
| <sup>103</sup> Rh              | 0.03±0.04    | ppb  | <sup>103</sup> Rh | 0.23±0.09      |  | 0.04±0.02     |  | < LOD          |  | 0.06±0.01      |     |          |  |
| <sup>107</sup> Ag              | 190.36±12.34 | ppb  | <sup>107</sup> Ag | 9.74±1.41      |  | 4.45±0.05     |  | 27.55±17.74    |  | 2.20±0.17      |     |          |  |
| <sup>111</sup> Cd              | 32.86±0.82   | ppb  | <sup>111</sup> Cd | 2.69±2.77      |  | 0.26±0.06     |  | 0.24±0.04      |  | 1.06±1.20      |     |          |  |
| <sup>118</sup> Sn              | 2.57±0.03    | ppm  | <sup>118</sup> Sn | 2.60±2.36      |  | 0.530.14±     |  | 1.69±1.12      |  | 3.45±1.95      | ppb |          |  |
| <sup>121</sup> Sb              | 626.57±2.00  | ppb  | <sup>121</sup> Sb | 0.66±0.15      |  | 0.22±0.12     |  | 0.43±0.03      |  | 0.43±0.11      |     |          |  |
| <sup>133</sup> Cs              | 3.35±0.06    | ppm  | <sup>133</sup> Cs | 0.23±0.09      |  | 0.09±0.04     |  | 0.03±0.00      |  | 0.13±0.00      |     |          |  |
| <sup>137</sup> Ba              | 108.98±4.13  | ppm  | <sup>137</sup> Ba | 12.99±0.80     |  | 42.90±56.23   |  | 128.92±53.85   |  | 48.23±14.89    |     |          |  |
| <sup>139</sup> La              | 2.94±0.05    | ppm  | <sup>139</sup> La | 6.47±0.09      |  | 4.452.27±     |  | 6.37±2.90      |  | 27.23±6.90     |     |          |  |
| <sup>140</sup> Ce              | 5.76±0.20    | ppm  | <sup>140</sup> Ce | 1.10±0.63      |  | 1.96±0.26     |  | 0.91±0.14      |  | 1.96±0.88      |     |          |  |
| <sup>141</sup> Pr              | 682.29±21.87 | ppb  | <sup>141</sup> Pr | 0.16±0.05      |  | 0.05±0.02     |  | 0.09±0.01      |  | 0.09±0.01      |     |          |  |
| <sup>146</sup> Nd              | 2.70±0.09    | ppm  | <sup>146</sup> Nd | 0.20±0.08      |  | 0.09±0.04     |  | 0.36±0.02      |  | 0.18±0.02      |     |          |  |
| <sup>147</sup> Sm              | 541.89±19.53 | ppb  | <sup>147</sup> Sm | 0.16±0.07      |  | 0.05±0.02     |  | 0.10±0.02      |  | 0.09±0.00      |     |          |  |
| <sup>153</sup> Eu              | 102.52±4.44  | ppb  | <sup>153</sup> Eu | 0.14±0.05      |  | 0.04±0.02     |  | 0.04±0.00      |  | 0.08±0.00      |     |          |  |
| <sup>157</sup> Gd              | 521.55±28.80 | ppb  | <sup>157</sup> Gd | 1.05±0.12      |  | 1.13±1.03     |  | 0.64±0.15      |  | 0.72±0.49      |     |          |  |
| <sup>163</sup> Dy              | 438.89±17.39 | ppb  | <sup>163</sup> Dy | 0.15±0.05      |  | 0.03±0.01     |  | 0.12±0.02      |  | 0.080.01±      |     |          |  |
| <sup>165</sup> Ho              | 83.91±3.38   | ppb  | <sup>165</sup> Ho | 0.15±0.05      |  | 0.03±0.01     |  | 0.02±0.00      |  | 0.07±0.00      |     |          |  |
| <sup>166</sup> Er              | 253.73±10.21 | ppb  | <sup>166</sup> Er | 0.15±0.04      |  | 0.03±0.01     |  | 0.06±0.01      |  | 0.08±0.00      |     |          |  |
| <sup>169</sup> Tm              | 37.35±1.73   | ppb  | <sup>169</sup> Tm | 0.14±0.05      |  | 0.03±0.01     |  | 0.01±0.00      |  | 0.07±0.00      |     |          |  |
| <sup>172</sup> Yb              | 268.25±10.94 | ppb  | <sup>172</sup> Yb | 0.13±0.04      |  | 0.04±0.02     |  | 0.05±0.01      |  | 0.08±0.00      |     |          |  |
| <sup>175</sup> Lu              | 38.75±1.64   | ppb  | <sup>175</sup> Lu | 0.14±0.06      |  | 0.03±0.01     |  | 0.01±0.00      |  | 0.06±0.00      |     |          |  |
| <sup>189</sup> Os              | < LOD        | ppb  | <sup>189</sup> Os | 2.17±1.20      |  | 0.45±0.02     |  | 0.62±0.13      |  | 1.14±0.43      |     |          |  |
| <sup>193</sup> Ir              | 6.13±0.89    | ppb  | <sup>193</sup> Ir | 0.22±0.10      |  | 0.01±0.01     |  | 0.04±0.07      |  | 0.09±0.07      |     |          |  |
| <sup>195</sup> Pt              | 18.76±1.26   | ppb  | <sup>195</sup> Pt | 0.36±0.11      |  | 0.09±0.03     |  | 0.11±0.08      |  | 0.13±0.02      |     |          |  |
| <sup>197</sup> Au              | < LOD        | ppb  | <sup>197</sup> Au | 2.54±1.11      |  | 0.43±0.02     |  | 0.91±0.23      |  | 1.65±0.29      |     |          |  |
| <sup>201</sup> Hg              | < LOD        | ppb  | <sup>201</sup> Hg | 4.96±1.10      |  | 1.38±0.01     |  | 2.68±0.87      |  | 3.86±0.63      |     |          |  |
| <sup>205</sup> Tl              | 218.58±9.41  | ppb  | <sup>205</sup> Tl | 0.93±0.30      |  | 0.06±0.06     |  | 0.07±0.04      |  | 0.34±0.21      |     |          |  |
| <sup>208</sup> Pb              | 2.25±0.10    | ppm  | <sup>208</sup> Pb | 50.61±10.78    |  | 23.43±13.50   |  | 42.07±22.01    |  | 42.61±17.12    |     |          |  |
| <sup>232</sup> Th              | 5.13±0.33    | ppm  | <sup>232</sup> Th | 0.56±0.33      |  | 0.05±0.03     |  | 1.56±1.71      |  | 1.72±0.28      |     |          |  |
| <sup>238</sup> U               | 264.47±14.42 | ppb  | <sup>238</sup> U  | 0.22±0.12      |  | 0.16±0.11     |  | 0.62±0.02      |  | 0.18±0.03      |     |          |  |

\*The measurements were performed using AAS method.

Table S5. Validation parameters for LC-CAD method

|                                   | Range          | Equation                             | R <sup>2</sup><br>(n=12) | LOD<br>[µg/mL] | LOQ<br>[µg/mL] |
|-----------------------------------|----------------|--------------------------------------|--------------------------|----------------|----------------|
| <b>Cholesterol</b>                | 0.35-25 mg/mL  | $y = -0.1017x^2 + 6.8241x + 9.2389$  | 0.995                    | 16.2           | 53.9           |
| <b>3β,3'β-dicholesteryl ether</b> | 0.04-3.5 mg/mL | $y = -2.2896x^2 + 19.2679x + 1.3320$ | 0.996                    | 13.2           | 42.8           |
| <b>Cholesta-3,5-diene</b>         | 0.10-10 mg/mL  | $y = -0.3056x^2 + 6.7769x + 1.9084$  | 0.995                    | 4.1            | 13.7           |

Table S6. Validation parameters for LC-MS analysis of studied oxidized 3β,3'β-dicholesteryl ethers.

|                                         | Range            | Equation         | R <sup>2</sup><br>(n=8) | LOD<br>[ng/mL] | LOQ<br>[ng/mL] | Recovery  |         |
|-----------------------------------------|------------------|------------------|-------------------------|----------------|----------------|-----------|---------|
| di-(7-ketocholesteryl) ether            | 25-475<br>ng/ml  | y=0.0068x+0.0316 | 0.9995                  | 3.3            | 11.1           | 50 ng/ml  | 89,59%  |
|                                         |                  |                  |                         |                |                | 100 ng/ml | 99,18%  |
|                                         |                  |                  |                         |                |                | 250 ng/ml | 99,28%  |
| 5,6α-epoxycholesteryl-cholesterol ether |                  | y=0.0012x+0.0150 | 0.9978                  | 7.1            | 23.7           | 50 ng/ml  | 98,08%  |
|                                         |                  |                  |                         |                |                | 100 ng/ml | 98,41%  |
|                                         |                  |                  |                         |                |                | 250 ng/ml | 89,02%  |
| 5,6β-epoxycholesteryl-cholesterol ether |                  | y=0.0019x+0.0220 | 0.9987                  | 8.4            | 27.9           | 50 ng/ml  | 101,09% |
|                                         |                  |                  |                         |                |                | 100 ng/ml | 106,15% |
|                                         |                  |                  |                         |                |                | 250 ng/ml | 109,53% |
| 7-ketocholesteryl-cholesterol ether     |                  | y=0.0045x+0.2053 | 0.9981                  | 5.5            | 18.4           | 50 ng/ml  | 89,77%  |
|                                         |                  |                  |                         |                |                | 100 ng/ml | 85,16%  |
|                                         |                  |                  |                         |                |                | 250 ng/ml | 111,25% |
| 7α-hydroxycholesteryl-cholesterol ether | y=0.0075x+0.0906 | 0.9990           | 6.7                     | 22.3           | 50 ng/ml       | 97,52%    |         |
|                                         |                  |                  |                         |                | 100 ng/ml      | 100,77%   |         |
|                                         |                  |                  |                         |                | 250 ng/ml      | 100,14%   |         |
| 7β-hydroxycholesteryl-cholesterol ether | y=0.0123x+0.1620 | 0.9985           | 7.6                     | 25.5           | 50 ng/ml       | 105,03%   |         |
|                                         |                  |                  |                         |                | 100 ng/ml      | 89,10%    |         |
|                                         |                  |                  |                         |                | 250 ng/ml      | 100,99%   |         |

Table S7. Validation parameters for LC-MS analysis of studied oxidized 3 $\beta$ ,3' $\beta$ -dicholesteryl ethers.

|                                                                                            | Range            | Equation         | R <sup>2</sup><br>(n=8) | LOD<br>[ng/mL] | LOQ<br>[ng/mL] | Recovery  |         |
|--------------------------------------------------------------------------------------------|------------------|------------------|-------------------------|----------------|----------------|-----------|---------|
| di-(7-ketositosteryl) ether<br>di(7-kSito) (8)                                             | 25-475<br>ng/ml  | y=0.0067x-0.1948 | 0.9961                  | 7.4            | 24.9           | 50 ng/ml  | 108.13% |
|                                                                                            |                  |                  |                         |                |                | 100 ng/ml | 100.24% |
|                                                                                            |                  |                  |                         |                |                | 250 ng/ml | 91.77%  |
| di-(7-ketostigmasteryl) ether<br>di(7-kStig) (9)                                           |                  | y=0.0030x-0.0604 | 0.9962                  | 5.9            | 19.5           | 50 ng/ml  | 94.52%  |
|                                                                                            |                  |                  |                         |                |                | 100 ng/ml | 92.43%  |
|                                                                                            |                  |                  |                         |                |                | 250 ng/ml | 86.34%  |
| 7 $\alpha$ -hydroxysitosteryl-sitosterol ether<br>7 $\alpha$ -hSito-Sito (11)              |                  | y=0.0068x-0.1465 | 0.9978                  | 10.1           | 33.5           | 50 ng/ml  | 95.40%  |
|                                                                                            |                  |                  |                         |                |                | 100 ng/ml | 103.17% |
|                                                                                            |                  |                  |                         |                |                | 250 ng/ml | 79.44%  |
| 7 $\alpha$ -hydroxystigmasteryl-stigmasterol<br>ether<br>7 $\alpha$ -hStig-Stig (12)       |                  | y=0.0045x-0.0497 | 0.9987                  | 8.8            | 29.3           | 50 ng/ml  | 96.32%  |
|                                                                                            |                  |                  |                         |                |                | 100 ng/ml | 87.13%  |
|                                                                                            |                  |                  |                         |                |                | 250 ng/ml | 92.88%  |
| 7 $\beta$ -hydroxysitosteryl-sitosterol ether<br>7 $\beta$ -hSito-Sito (14)                |                  | y=0.0056x-0.1025 | 0.9973                  | 11.0           | 36.7           | 50 ng/ml  | 89.34%  |
|                                                                                            |                  |                  |                         |                |                | 100 ng/ml | 106.78% |
|                                                                                            |                  |                  |                         |                |                | 250 ng/ml | 81.47%  |
| 7 $\beta$ -hydroxystigmasteryl-stigmasterol<br>ether<br>7 $\beta$ -hStig-Stig (15)         |                  | y=0.0030x+0.0071 | 0.9995                  | 9.0            | 29.9           | 50 ng/ml  | 82.67%  |
|                                                                                            | 100 ng/ml        |                  |                         |                |                | 83.10%    |         |
|                                                                                            | 250 ng/ml        |                  |                         |                |                | 95.73%    |         |
| 7-ketositosteryl-sitosterol ether<br>7-kSito-Sito (5)                                      | y=0.0046x+0.0607 | 0.9992           | 6.1                     | 20.4           | 50 ng/ml       | 86.19%    |         |
|                                                                                            |                  |                  |                         |                | 100 ng/ml      | 82.03%    |         |
|                                                                                            |                  |                  |                         |                | 250 ng/ml      | 75.55%    |         |
| 7-ketositgmasteryl-stigmasterol<br>ether<br>7-kStig-Stig (6)                               | y=0.0037x+0.0276 | 0.9995           | 8.5                     | 28.1           | 50 ng/ml       | 97.00%    |         |
|                                                                                            |                  |                  |                         |                | 100 ng/ml      | 90.60%    |         |
|                                                                                            |                  |                  |                         |                | 250 ng/ml      | 84.31%    |         |
| 5,6 $\alpha$ -epoxysitosteryl-sitosterol ether<br>5,6 $\alpha$ -epoxySito-Sito (23)        | y=0.0103x-0.1273 | 0.9975           | 6.4                     | 21.2           | 50 ng/ml       | 86.98%    |         |
|                                                                                            |                  |                  |                         |                | 100 ng/ml      | 100.66%   |         |
|                                                                                            |                  |                  |                         |                | 250 ng/ml      | 84.40%    |         |
| 5,6 $\alpha$ -epoxystigmasteryl-stigmasterol<br>ether<br>5,6 $\alpha$ -epoxyStig-Stig (24) | y=0.0071x-0.0048 | 0.9982           | 3.4                     | 11.4           | 50 ng/ml       | 90.80%    |         |
|                                                                                            |                  |                  |                         |                | 100 ng/ml      | 86.69%    |         |
|                                                                                            |                  |                  |                         |                | 250 ng/ml      | 94.54%    |         |
| 5,6 $\beta$ -epoxysitosteryl-sitosterol ether<br>5,6 $\beta$ -epoxySito-Sito (26)          | y=0.0073x-0.0992 | 0.9991           | 9.2                     | 30.6           | 50 ng/ml       | 85.42%    |         |
|                                                                                            |                  |                  |                         |                | 100 ng/ml      | 95.14%    |         |
|                                                                                            |                  |                  |                         |                | 250 ng/ml      | 86.58%    |         |
| 5,6 $\beta$ -epoxystigmasteryl-stigmasterol<br>ether<br>5,6 $\beta$ -epoxyStig-Stig (27)   | y=0.0053x+0.0107 | 0.9986           | 10.3                    | 34.4           | 50 ng/ml       | 87.01%    |         |
|                                                                                            |                  |                  |                         |                | 100 ng/ml      | 88.80%    |         |
|                                                                                            |                  |                  |                         |                | 250 ng/ml      | 94.99%    |         |

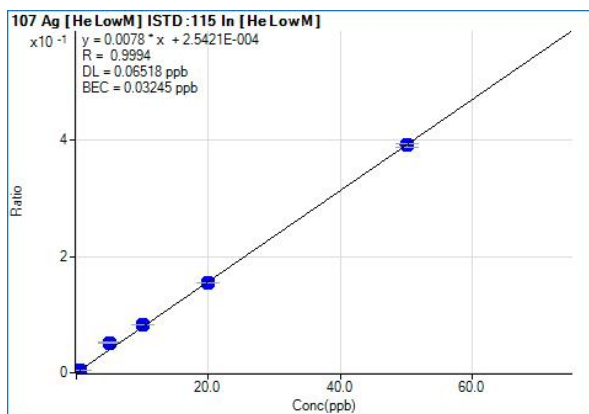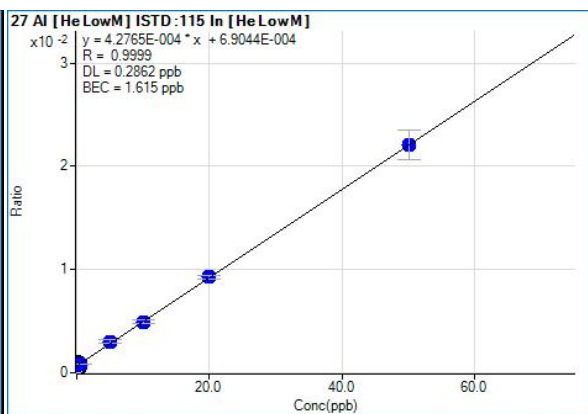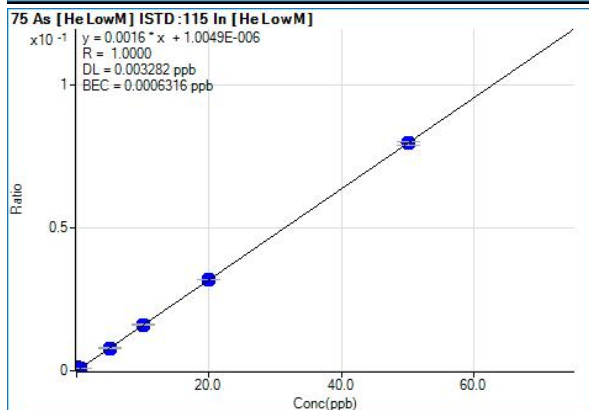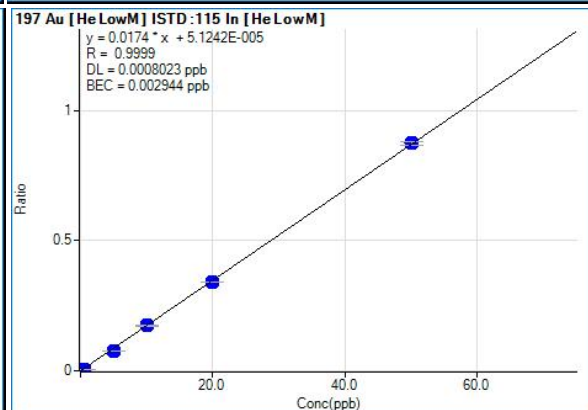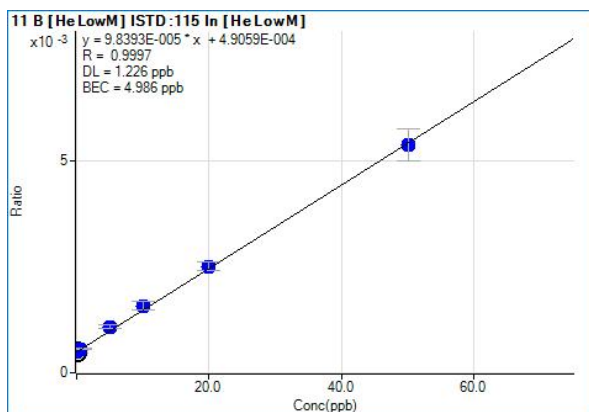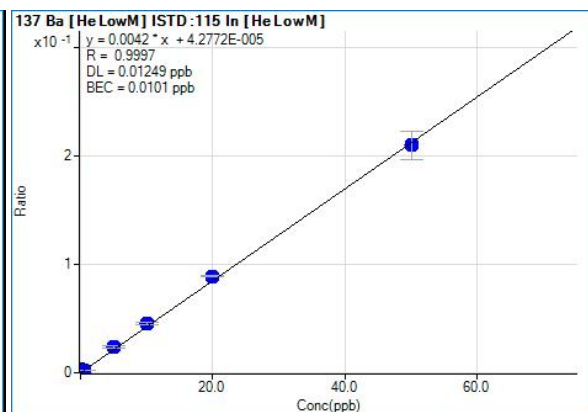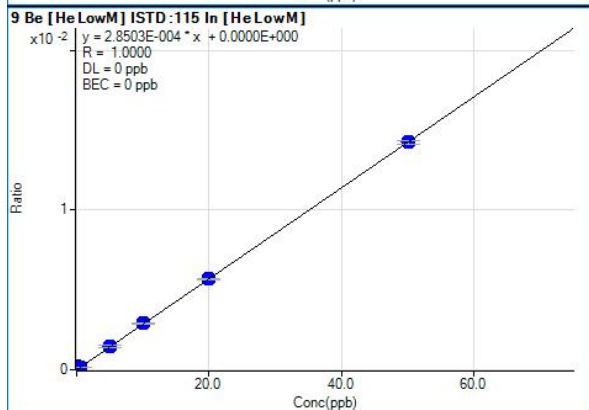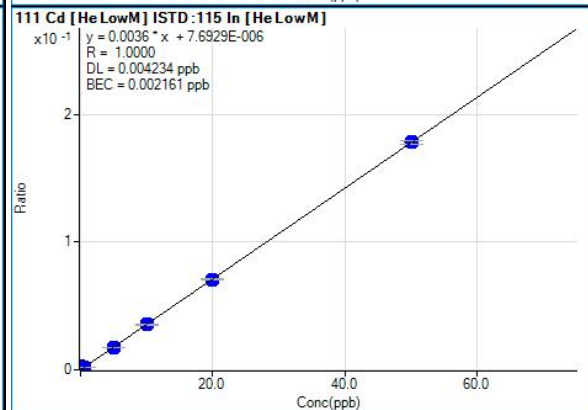

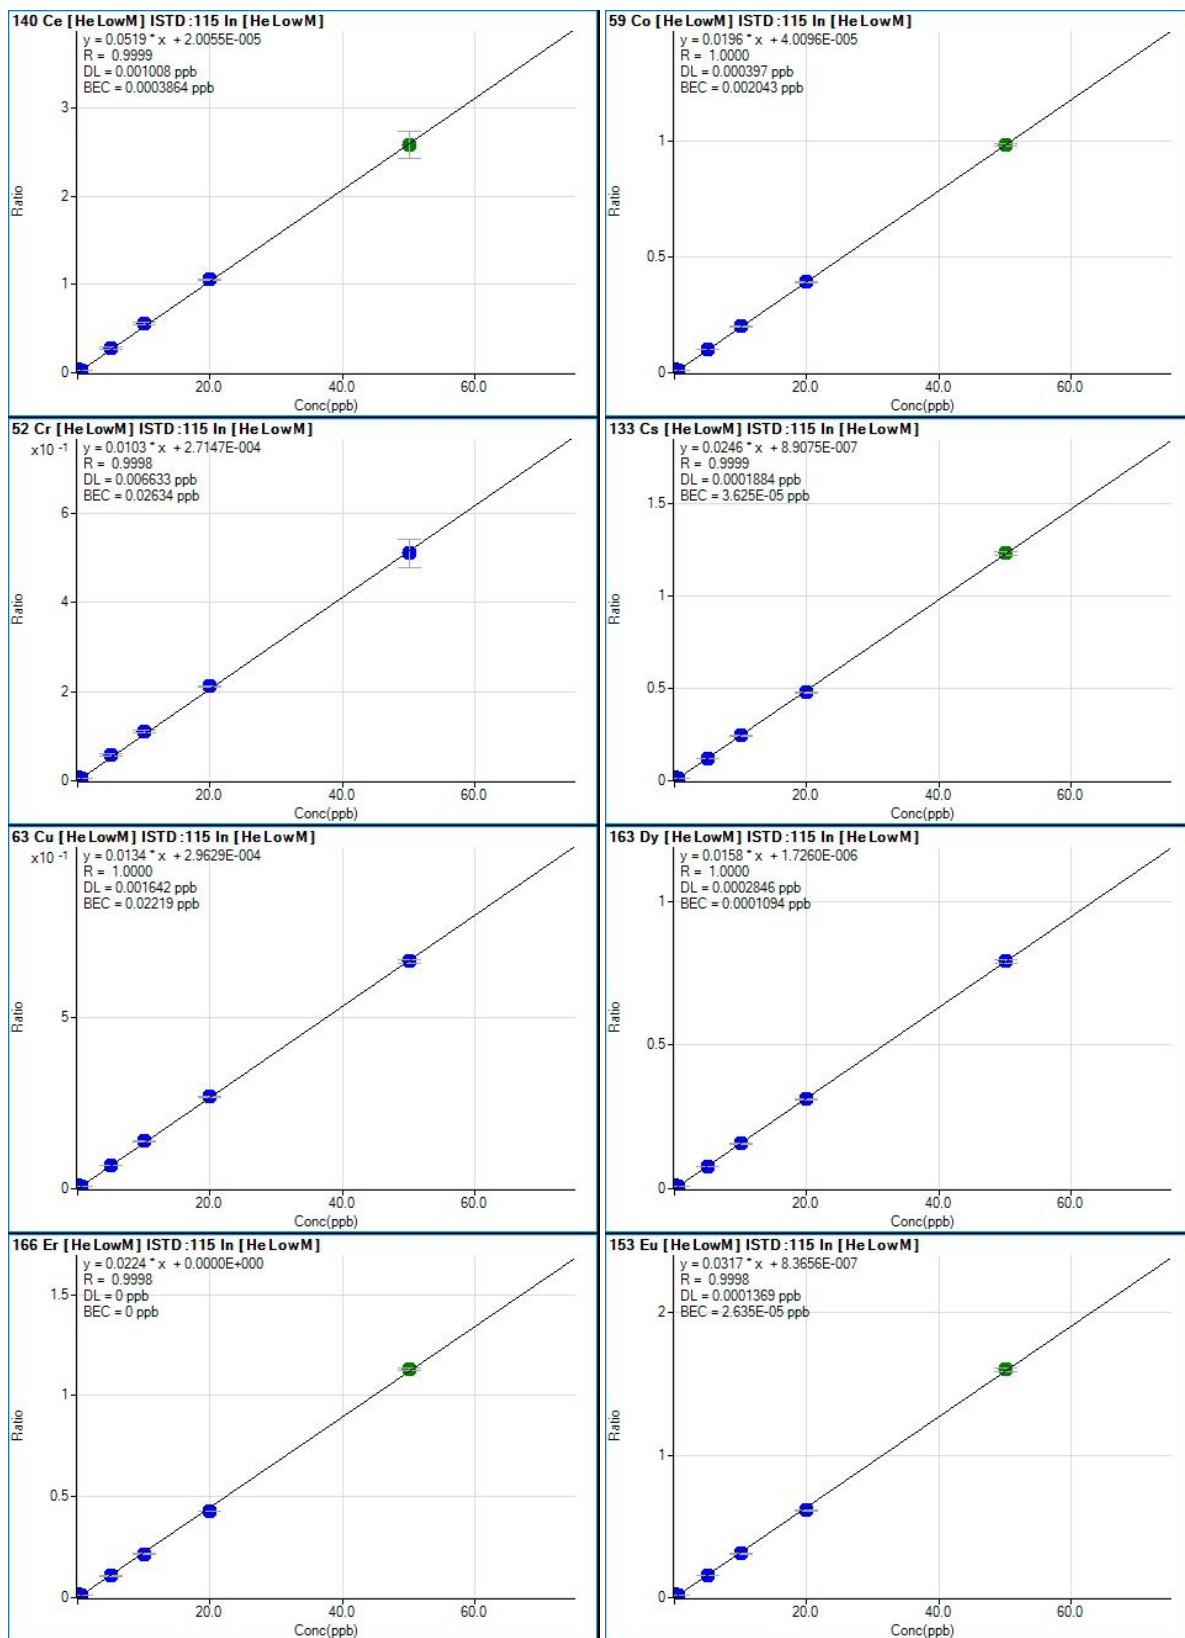

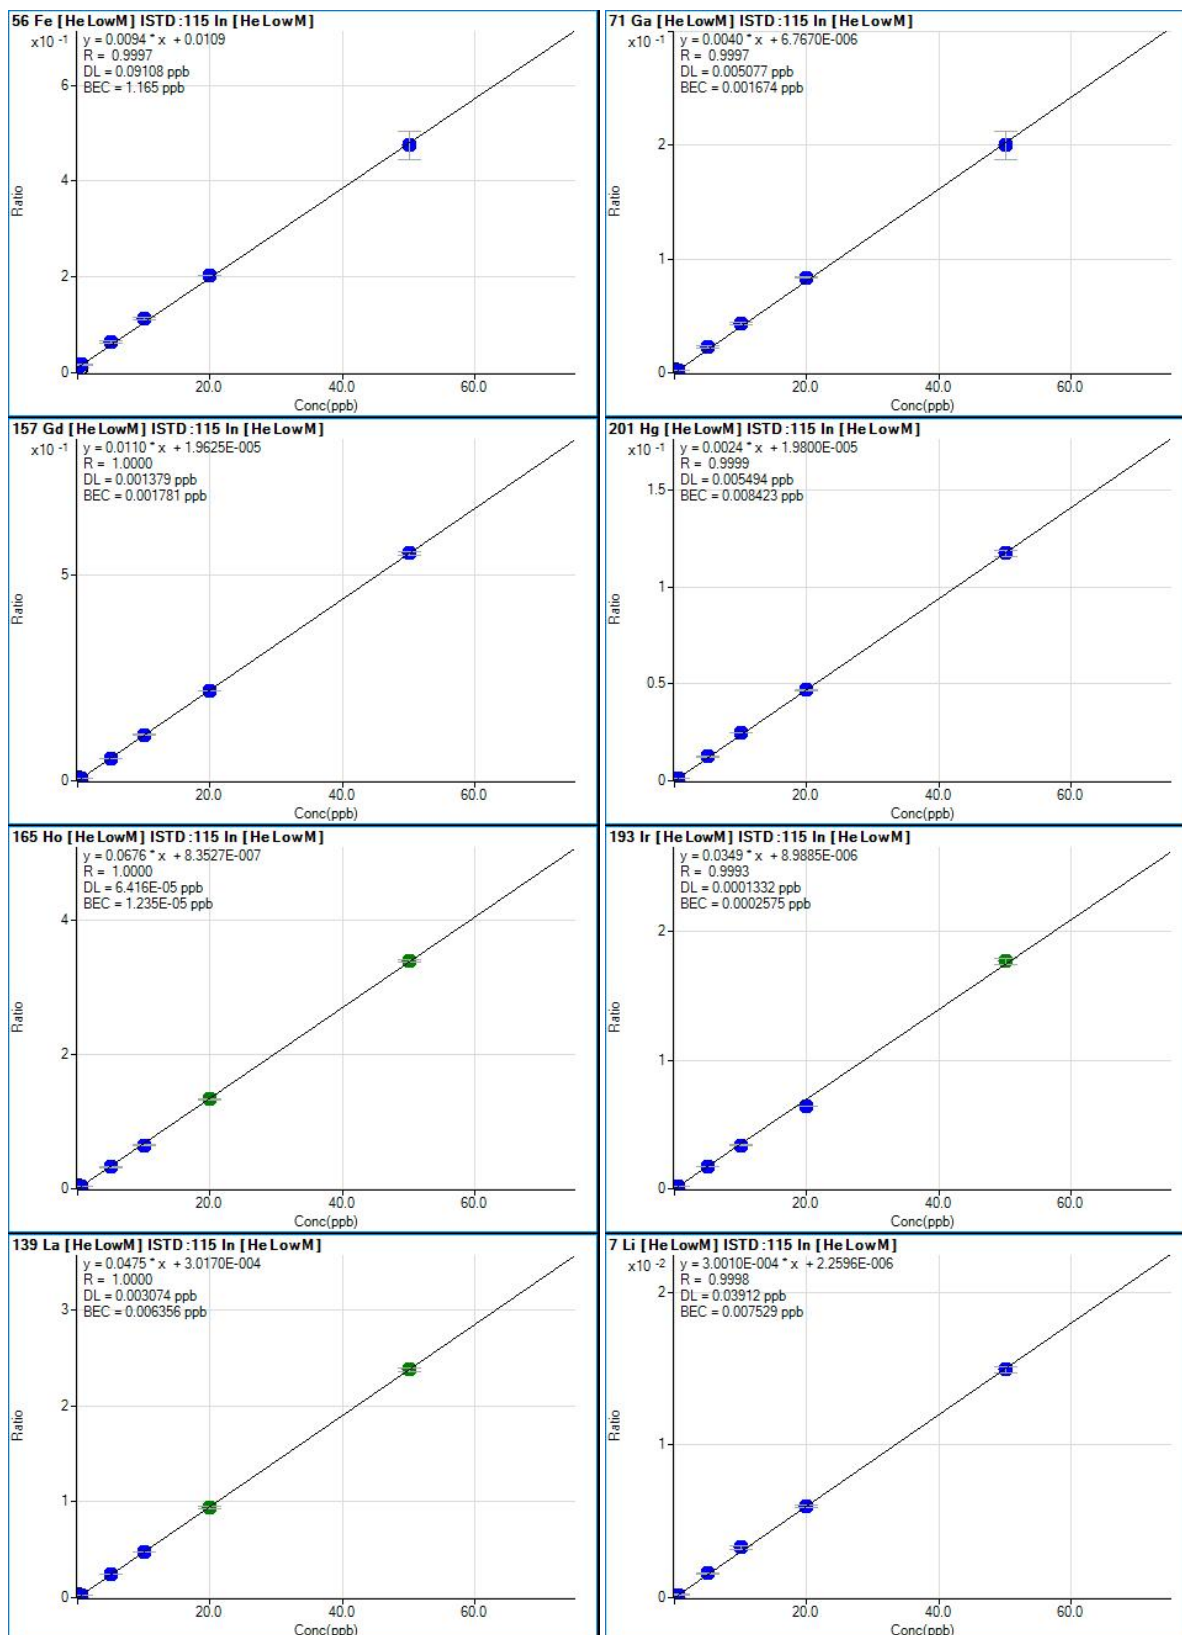

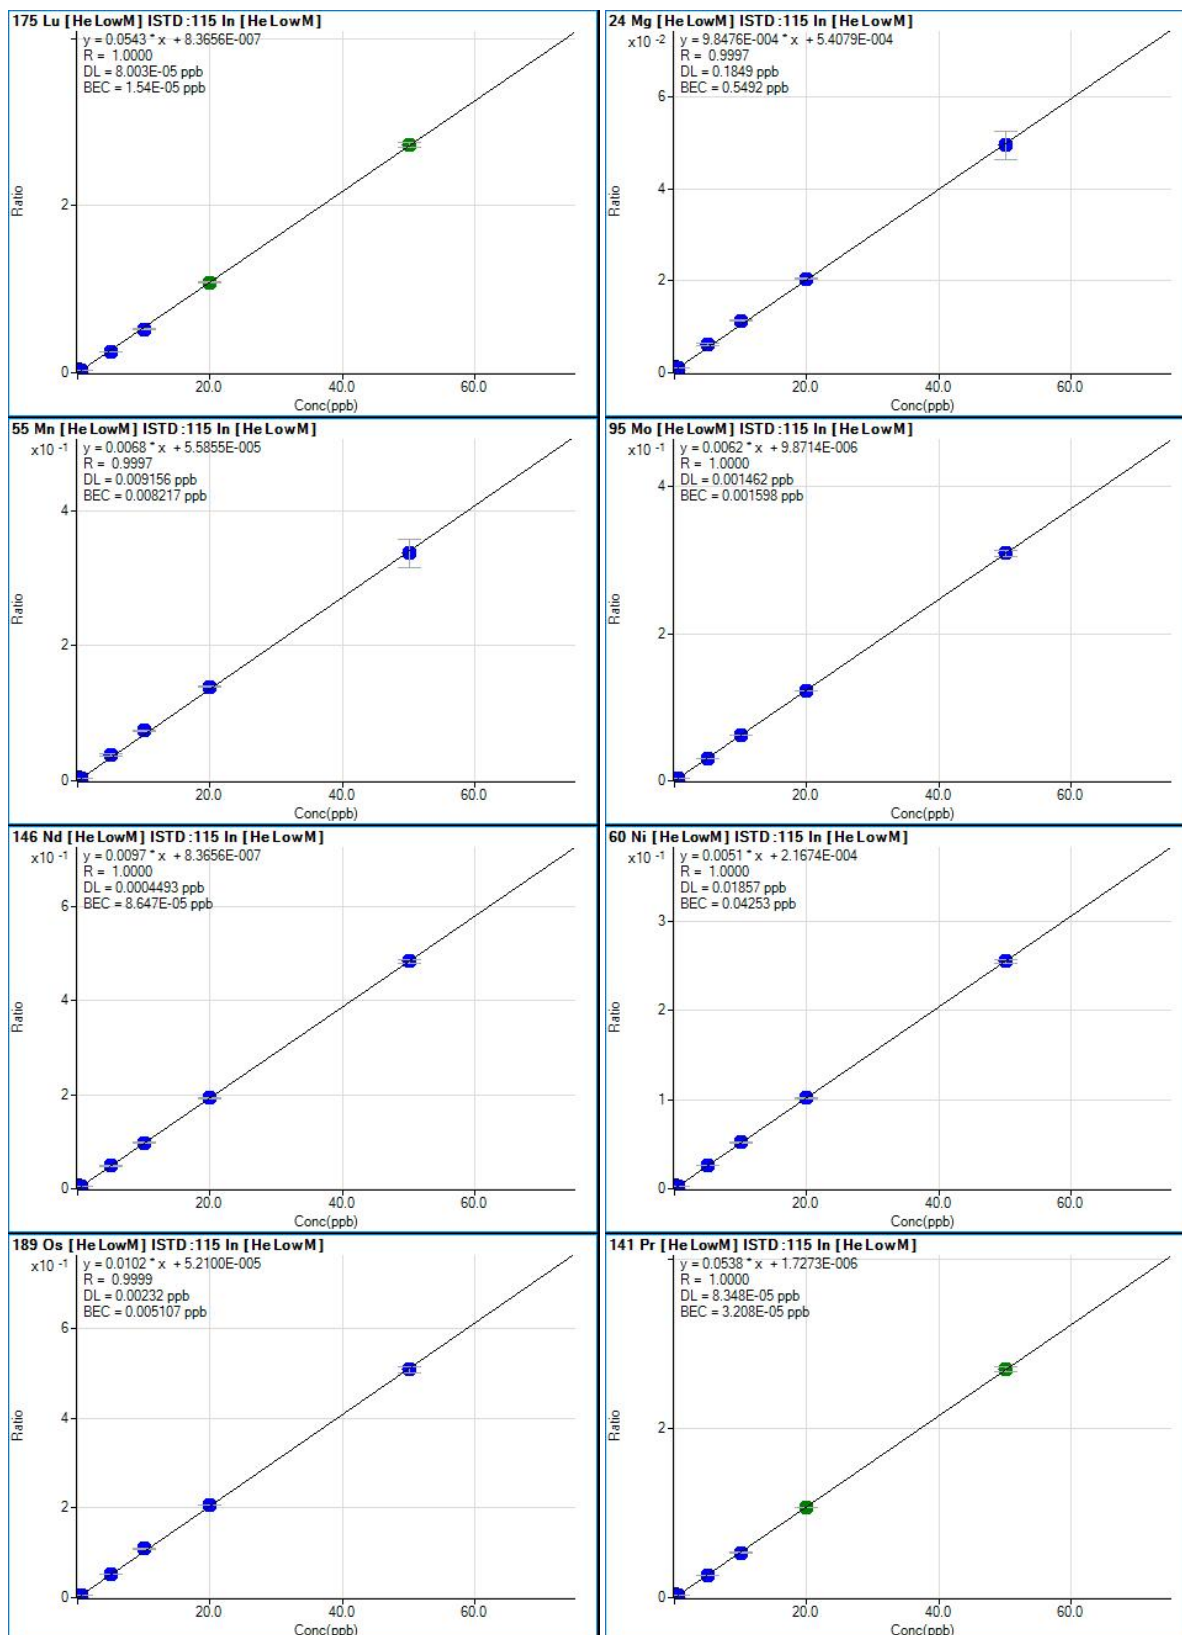

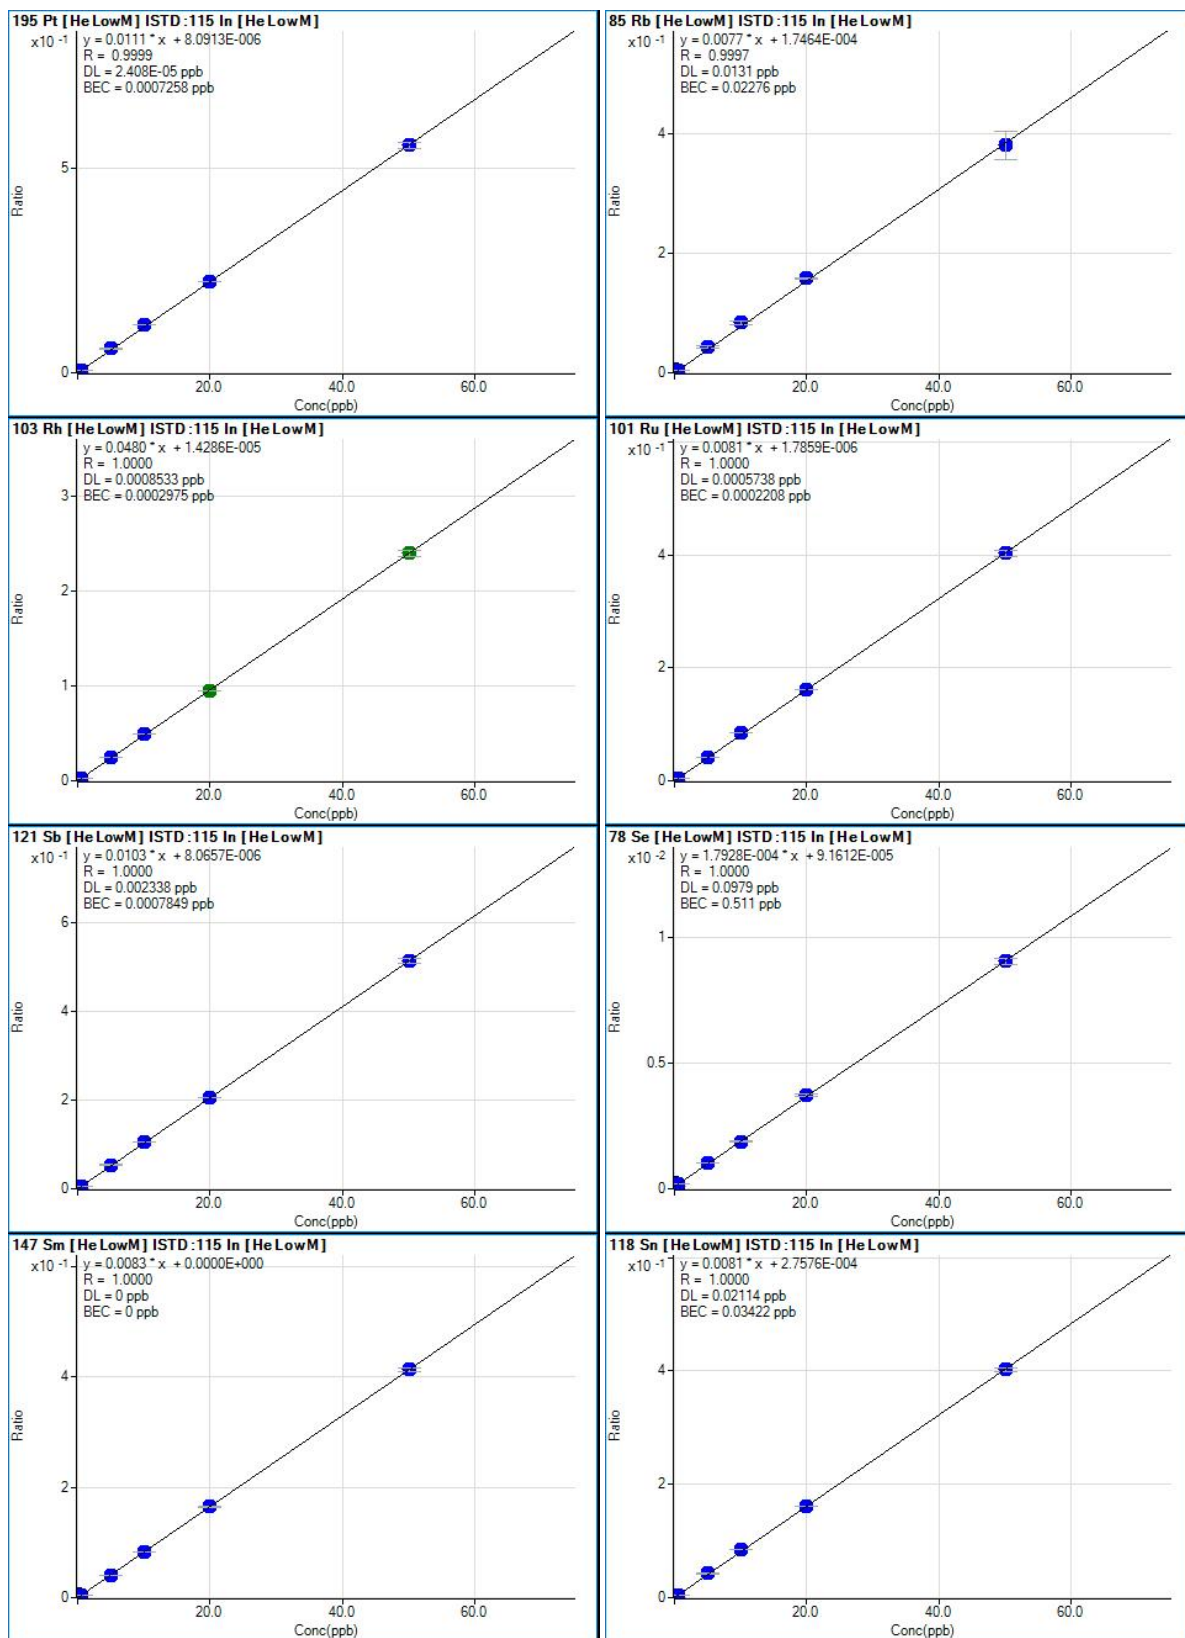

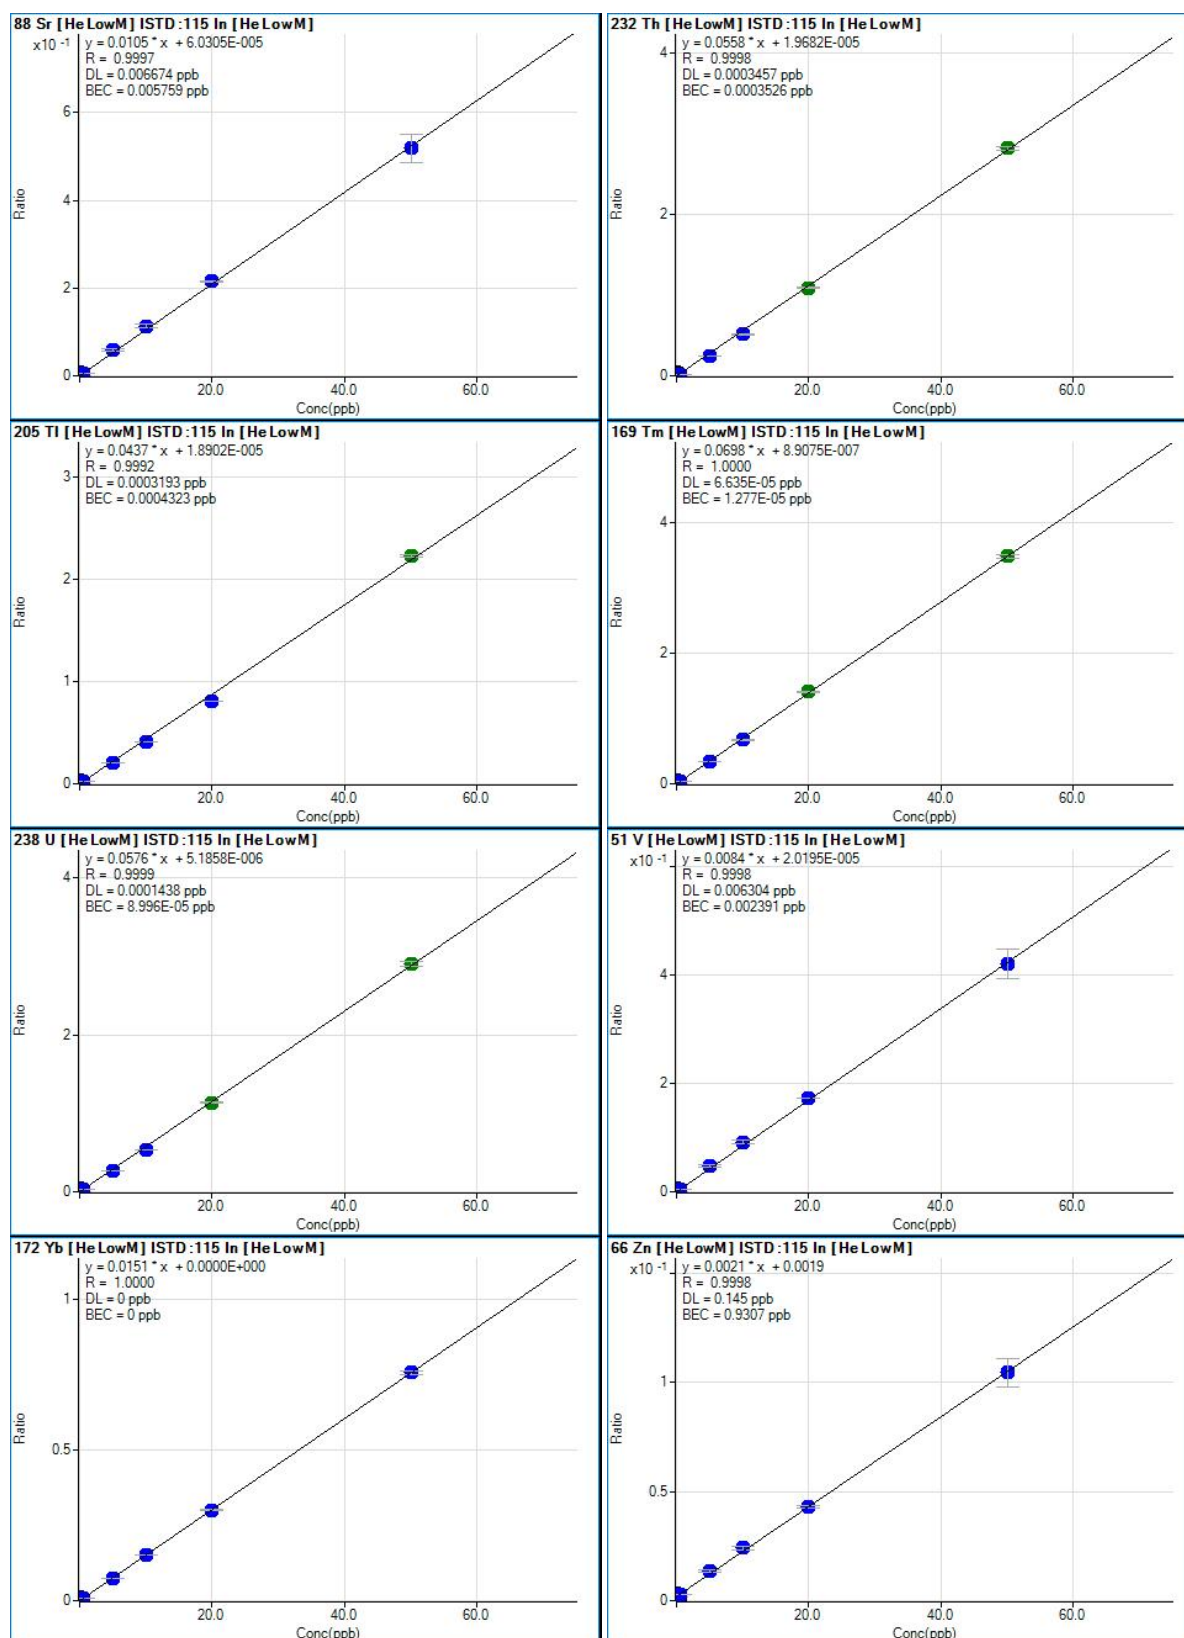

Fig S1. Linearity curves for all 54 metals measured by ICP-MS.

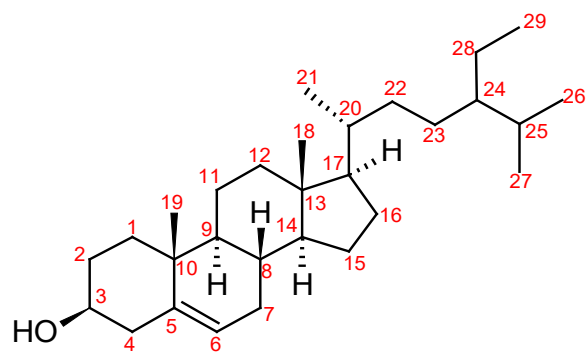

Figure S2. Steroids numbering system

| Atom No. | 3 $\beta$ ,3' $\beta$ -dicholesteryl ether (1) |                                | Cholest-5-en-7-one-3 $\beta$ -yl-cholesterol ether<br>(7-ketocholesteryl-cholesterol ether) (4) |                    |                     |                    | 5-Cholesten-3 $\beta$ -ol-7-one (28) |                                | Cholesta-3,5-diene (31)           |                                |
|----------|------------------------------------------------|--------------------------------|-------------------------------------------------------------------------------------------------|--------------------|---------------------|--------------------|--------------------------------------|--------------------------------|-----------------------------------|--------------------------------|
|          | <sup>1</sup> H NMR $\delta$ (ppm)              | <sup>13</sup> C $\delta$ (ppm) | <i>native sterol part</i>                                                                       |                    | <i>7-keton part</i> |                    | <sup>1</sup> H NMR $\delta$ (ppm)    | <sup>13</sup> C $\delta$ (ppm) | <sup>1</sup> H NMR $\delta$ (ppm) | <sup>13</sup> C $\delta$ (ppm) |
| 1        | 1.04, 1.84                                     | 37.43                          | 1.04, 1.86                                                                                      | 37.31              | 1.16, 1.94          | 36.47              | 1.20, 1.95                           | 36.34                          | 1.16, 1.31                        | 33.78                          |
| 2        | 1.82, 1.49                                     | 29.43                          | 1.82, 1.50                                                                                      | 29.30              | 1.93, 1.59          | 29.14              | 1.94, 1.62                           | 31.17                          | 2.18, 2.10                        | 23.05                          |
| 3        | 3.28                                           | 76.34                          | 3.29                                                                                            | 76.87              | 3.41                | 75.05              | 3.67                                 | 70.49                          | 5.59                              | 124.99                         |
| 4        | 2.28, 2.22                                     | 40.06                          | 2.27, 2.23                                                                                      | 39.98              | 2.49, 2.37          | 39.90              | 2.51, 2.40                           | 41.81                          | 5.93                              | 128.99                         |
| 5        | -                                              | 141.35                         | -                                                                                               | 140.96             | -                   | 165.63             | -                                    | 165.18                         | -                                 | 141.47                         |
| 6        | 5.33                                           | 121.33                         | 5.34                                                                                            | 121.66             | 5.67                | 125.93             | 5.69                                 | 126.08                         | 5.39                              | 123.15                         |
| 7        | 1.52, 1.97                                     | 31.96                          | 1.51, 1.97                                                                                      | 31.94              | -                   | 202.33             | -                                    | 202.35                         | 1.68, 2.16                        | 31.77                          |
| 8        | 1.44                                           | 31.90                          | 1.45                                                                                            | 31.89              | 2.23                | 45.39              | 2.24                                 | 45.40                          | 1.62                              | 31.78                          |
| 9        | 0.91                                           | 50.25                          | 0.92                                                                                            | 50.22              | 1.48                | 50.01              | 1.50                                 | 49.92                          | 1.00                              | 48.39                          |
| 10       | -                                              | 36.86                          | -                                                                                               | 36.83              | -                   | 38.59              | -                                    | 38.27                          | -                                 | 35.18                          |
| 11       | 1.45, 1.49                                     | 21.06                          | 1.45, 1.49                                                                                      | 21.06              | 1.57, 1.57          | 21.19              | 1.54, 1.57                           | 21.22                          | 1.55, 1.41                        | 20.96                          |
| 12       | 1.15, 2.01                                     | 39.80                          | 1.15, 2.01                                                                                      | 39.77              | 1.12, 2.03          | 38.73              | 1.13, 2.03                           | 38.70                          | 1.18, 2.02                        | 39.82                          |
| 13       | -                                              | 42.32                          | -                                                                                               | 42.32              | -                   | 43.09              | -                                    | 43.09                          | -                                 | 42.46                          |
| 14       | 0.98                                           | 56.79                          | 0.99                                                                                            | 56.77              | 1.33                | 49.97              | 1.30                                 | 49.96                          | 1.05                              | 56.96                          |
| 15       | 1.06, 1.57                                     | 24.29                          | 1.06, 1.57                                                                                      | 24.29              | 1.24, 2.40          | 26.31              | 1.24, 2.40                           | 26.31                          | 1.08, 1.59                        | 24.18                          |
| 16       | 1.82, 1.26                                     | 28.23                          | 1.82, 1.26                                                                                      | 28.23              | 1.89, 1.27          | 28.55              | 1.89, 1.27                           | 28.54                          | 1.85, 1.27                        | 28.24                          |
| 17       | 1.08                                           | 56.16                          | 1.09                                                                                            | 56.15              | 1.08                | 54.80              | 1.08                                 | 54.78                          | 1.10                              | 56.16                          |
| 18       | 0.67                                           | 11.85                          | 0.676                                                                                           | 11.85              | 0.679               | 11.96              | 0.68                                 | 11.96                          | 0.71                              | 11.97                          |
| 19       | 1.00                                           | 19.39                          | 1.00                                                                                            | 19.37              | 1.18                | 17.27              | 1.20                                 | 17.30                          | 0.96                              | 18.77                          |
| 20       | 1.37                                           | 35.78                          | 1.37                                                                                            | 35.78              | 1.37                | 35.70              | 1.37                                 | 35.70                          | 1.38                              | 35.81                          |
| 21       | 0.91                                           | 18.71                          | 0.91                                                                                            | 18.72              | 0.92                | 18.87              | 0.92                                 | 18.86                          | 0.92                              | 18.71                          |
| 22       | 1.33, 0.99                                     | 36.19                          | 1.34, 1.00                                                                                      | 36.18              | 1.34, 1.00          | 36.18              | 1.34, 1.01                           | 36.17                          | 1.34, 1.00                        | 36.19                          |
| 23       | 1.33, 1.14                                     | 23.82                          | 1.34, 1.14                                                                                      | 23.82              | 1.34, 1.14          | 23.82              | 1.34, 1.13                           | 23.82                          | 1.34, 1.14                        | 23.84                          |
| 24       | 1.12, 1.12                                     | 39.52                          | 1.12, 1.12                                                                                      | 39.52              | 1.12, 1.12          | 39.47              | 1.12, 1.12                           | 39.47                          | 1.12, 1.12                        | 39.52                          |
| 25       | 1.52                                           | 28.01                          | 1.52                                                                                            | 28.01 <sup>a</sup> | 1.51                | 27.99 <sup>a</sup> | 1.51                                 | 27.99                          | 1.52                              | 28.01                          |
| 26       | 0.86                                           | 22.56                          | 0.86                                                                                            | 22.56 <sup>b</sup> | 0.86                | 22.55 <sup>b</sup> | 0.86                                 | 22.55                          | 0.86                              | 22.56                          |
| 27       | 0.87                                           | 22.81                          | 0.87                                                                                            | 22.81 <sup>c</sup> | 0.87                | 22.80 <sup>c</sup> | 0.87                                 | 22.80                          | 0.87                              | 22.81                          |

<sup>a, b, c</sup> Groups of resonances ambiguously assigned (could be interchanged within the group)

Table S8. <sup>1</sup>H and <sup>13</sup>C NMR chemical shifts of synthesized **1**, **4**, **28** and **31** steroids

| Atom No. | 3 $\beta$ ,3'-disitosteryl ether (2) |                                | Sitost-5-en-7-one-3 $\beta$ -yl-sitosterol ether (7-ketositosteryl-sitosterol ether) (5) |                                |                                   |                                | 5-Sitosten-3 $\beta$ -ol-7-one (29) |                                |
|----------|--------------------------------------|--------------------------------|------------------------------------------------------------------------------------------|--------------------------------|-----------------------------------|--------------------------------|-------------------------------------|--------------------------------|
|          | <sup>1</sup> H NMR $\delta$ (ppm)    | <sup>13</sup> C $\delta$ (ppm) | <i>native sterol part</i>                                                                |                                | <i>7-keton part</i>               |                                | <sup>1</sup> H NMR $\delta$ (ppm)   | <sup>13</sup> C $\delta$ (ppm) |
|          |                                      |                                | <sup>1</sup> H NMR $\delta$ (ppm)                                                        | <sup>13</sup> C $\delta$ (ppm) | <sup>1</sup> H NMR $\delta$ (ppm) | <sup>13</sup> C $\delta$ (ppm) |                                     |                                |
| 1        | 1.03, 1.84                           | 37.42                          | 1.04, 1.85                                                                               | 37.31                          | 1.16, 1.94                        | 36.47                          | 1.21, 1.95                          | 36.34                          |
| 2        | 1.82, 1.49                           | 29.43                          | 1.82, 1.50                                                                               | 29.30                          | 1.93, 1.58                        | 29.13                          | 1.94, 1.62                          | 31.16                          |
| 3        | -                                    | 76.34                          | 3.29                                                                                     | 76.87                          | 3.41                              | 75.05                          | 3.68                                | 70.49                          |
| 4        | 2.28, 2.22                           | 40.06                          | 2.27, 2.23                                                                               | 39.98                          | 2.49, 2.37                        | 39.90                          | 2.51, 2.40                          | 41.80                          |
| 5        | -                                    | 141.35                         | -                                                                                        | 140.96                         | -                                 | 165.64                         | -                                   | 165.16                         |
| 6        | 5.33                                 | 121.32                         | 5.34                                                                                     | 121.65                         | 5.67                              | 125.92                         | 5.69                                | 126.08                         |
| 7        | 1.52, 1.97                           | 31.96                          | 1.53, 1.97                                                                               | 31.94                          | -                                 | 202.34                         | -                                   | 202.36                         |
| 8        | 1.43                                 | 31.90                          | 1.45                                                                                     | 31.89                          | 2.23                              | 45.39                          | 2.24                                | 45.40                          |
| 9        | 0.92                                 | 50.25                          | 0.92                                                                                     | 50.21                          | 1.48                              | 50.01                          | 1.51                                | 49.92                          |
| 10       | -                                    | 36.85                          | -                                                                                        | 36.83                          | -                                 | 38.59                          | -                                   | 38.27                          |
| 11       | 1.44, 1.49                           | 21.06                          | 1.49, 1.45                                                                               | 21.05                          | 1.57, 1.57                        | 21.19                          | 1.57, 1.57                          | 21.20                          |
| 12       | 1.16, 2.01                           | 39.79                          | 1.16, 2.01                                                                               | 39.76                          | 1.13, 2.03                        | 38.72                          | 1.13, 2.04                          | 38.68                          |
| 13       | -                                    | 42.32                          | -                                                                                        | 42.32                          | -                                 | 43.08                          | -                                   | 43.08                          |
| 14       | 0.99                                 | 56.79                          | 0.99                                                                                     | 56.76                          | 1.33                              | 49.97                          | 1.33                                | 49.95                          |
| 15       | 1.06, 1.57                           | 24.30                          | 1.06, 1.57                                                                               | 24.29                          | 1.24, 2.40                        | 26.32                          | 1.26, 2.41                          | 26.31                          |
| 16       | 1.84, 1.26                           | 28.24                          | 1.84, 1.26                                                                               | 28.23                          | 1.91, 1.28                        | 28.55                          | 1.91, 1.27                          | 28.54                          |
| 17       | 1.10                                 | 56.05                          | 1.10                                                                                     | 56.05                          | 1.09                              | 54.70                          | 1.10                                | 54.69                          |
| 18       | 0.68                                 | 11.85                          | 0.68                                                                                     | 11.96                          | 0.68                              | 11.85                          | 0.68                                | 11.96                          |
| 19       | 1.00                                 | 19.39                          | 1.00                                                                                     | 19.36                          | 1.18                              | 17.26                          | 1.20                                | 17.30                          |
| 20       | 1.36                                 | 36.13                          | 1.36                                                                                     | 36.13                          | 1.36                              | 36.06                          | 1.36                                | 36.07                          |
| 21       | 0.92                                 | 18.78                          | 0.92                                                                                     | 18.77                          | 0.92                              | 18.92                          | 0.93                                | 18.91                          |
| 22       | 1.32, 1.01                           | 33.94                          | 1.33, 1.02                                                                               | 33.94                          | 1.33, 1.02                        | 33.94                          | 1.34, 1.03                          | 33.93                          |
| 23       | 1.16                                 | 26.06                          | 1.16                                                                                     | 26.07                          | 1.16                              | 26.07                          | 1.16                                | 26.07                          |
| 24       | 0.93                                 | 45.83                          | 0.93                                                                                     | 45.83 <sup>a</sup>             | 0.93                              | 45.81 <sup>a</sup>             | 0.93                                | 45.81                          |
| 25       | 1.66                                 | 29.14                          | 1.67                                                                                     | 29.12                          | 1.67                              | 29.12                          | 1.67                                | 29.11                          |
| 26       | 0.81                                 | 19.03                          | 0.81                                                                                     | 19.03                          | 0.81                              | 19.03                          | 0.81                                | 19.03                          |
| 27       | 0.83                                 | 19.81                          | 0.83                                                                                     | 19.78                          | 0.83                              | 19.78                          | 0.83                                | 19.79                          |
| 28       | 1.25                                 | 23.06                          | 1.25                                                                                     | 23.06 <sup>b</sup>             | 1.25                              | 23.04 <sup>b</sup>             | 1.25                                | 23.04                          |
| 29       | 0.85                                 | 11.98                          | 0.85                                                                                     | 11.97                          | 0.85                              | 11.97                          | 0.85                                | 11.96                          |

<sup>a, b</sup> Groups of resonances ambiguously assigned (could be interchanged within the group)

Table S9. <sup>1</sup>H and <sup>13</sup>C NMR chemical shifts of synthesized **2**, **5** and **29** steroids

| Atom No. | 3 $\beta$ ,3' $\beta$ -distigmasteryl ether (3) |                                | Stigmast-5-en-7-one-3 $\beta$ -yl-stigmasterol ether (7-ketostigmasteryl-stigmasterol ether) (6) |                                |                                   |                                | 5-Stigmasten-3 $\beta$ -ol-7-one (30) |                                |
|----------|-------------------------------------------------|--------------------------------|--------------------------------------------------------------------------------------------------|--------------------------------|-----------------------------------|--------------------------------|---------------------------------------|--------------------------------|
|          | <sup>1</sup> H NMR $\delta$ (ppm)               | <sup>13</sup> C $\delta$ (ppm) | <i>native sterol part</i>                                                                        |                                | <i>7-keton part</i>               |                                | <sup>1</sup> H NMR $\delta$ (ppm)     | <sup>13</sup> C $\delta$ (ppm) |
|          |                                                 |                                | <sup>1</sup> H NMR $\delta$ (ppm)                                                                | <sup>13</sup> C $\delta$ (ppm) | <sup>1</sup> H NMR $\delta$ (ppm) | <sup>13</sup> C $\delta$ (ppm) |                                       |                                |
| 1        | 1.04, 1.84                                      | 37.41                          | 1.04, 1.86                                                                                       | 37.31                          | 1.17, 1.94                        | 36.47                          | 1.21, 1.96                            | 36.34                          |
| 2        | 1.82, 1.49                                      | 29.43                          | 1.82, 1.50                                                                                       | 29.31                          | 1.93, 1.59                        | 29.14                          | 1.94, 1.62                            | 31.15                          |
| 3        | 3.28                                            | 76.33                          | 3.29                                                                                             | 76.87                          | 3.41                              | 75.05                          | 3.67                                  | 70.47                          |
| 4        | 2.28, 2.22                                      | 40.04                          | 2.27, 2.23                                                                                       | 39.98                          | 2.50, 2.37                        | 39.90                          | 2.51, 2.40                            | 41.81                          |
| 5        | -                                               | 141.32                         | -                                                                                                | 140.95                         | -                                 | 165.62                         | -                                     | 165.17                         |
| 6        | 5.33                                            | 121.30                         | 5.34                                                                                             | 121.65                         | 5.67                              | 125.91                         | 5.69                                  | 126.05                         |
| 7        | 1.52, 1.96                                      | 31.93                          | 1.51, 1.97                                                                                       | 31.93                          | -                                 | 202.25                         | -                                     | 202.27                         |
| 8        | 1.45                                            | 31.89                          | 1.45                                                                                             | 31.88                          | 2.23                              | 45.36                          | 2.24                                  | 45.37                          |
| 9        | 0.92                                            | 50.26                          | 0.92                                                                                             | 50.23                          | 1.49                              | 50.02                          | 1.51                                  | 49.93                          |
| 10       | -                                               | 36.85                          | -                                                                                                | 36.83                          | -                                 | 38.61                          | -                                     | 38.28                          |
| 11       | 1.45, 1.50                                      | 21.04                          | 1.49, 1.49                                                                                       | 21.04                          | 1.57, 1.57                        | 21.17                          | 1.58, 1.58                            | 21.19                          |
| 12       | 1.18, 1.99                                      | 39.68                          | 1.18, 1.99                                                                                       | 39.66                          | 1.15, 2.00                        | 38.60                          | 1.15, 2.01                            | 38.57                          |
| 13       | -                                               | 42.20                          | -                                                                                                | 42.21                          | -                                 | 42.97                          | -                                     | 42.97                          |
| 14       | 1.01                                            | 56.88                          | 1.01                                                                                             | 56.86                          | 1.34                              | 50.04                          | 1.35                                  | 50.02                          |
| 15       | 1.04, 1.55                                      | 24.35                          | 1.03, 1.55                                                                                       | 24.35                          | 1.24, 2.38                        | 26.40                          | 1.24, 2.38                            | 26.39                          |
| 16       | 1.70, 1.25                                      | 28.91                          | 1.70, 1.26                                                                                       | 28.91                          | 1.77, 1.28                        | 29.04                          | 1.77, 1.28                            | 29.03                          |
| 17       | 1.15                                            | 55.95                          | 1.15                                                                                             | 55.95                          | 1.14                              | 54.70                          | 1.14                                  | 54.68                          |
| 18       | 0.69                                            | 12.03                          | 0.70                                                                                             | 12.03                          | 0.70                              | 12.18                          | 0.70                                  | 12.18                          |
| 19       | 1.00                                            | 19.37                          | 1.00                                                                                             | 19.37                          | 1.18                              | 17.26                          | 1.20                                  | 17.30                          |
| 20       | 2.04                                            | 40.47                          | 2.04                                                                                             | 40.47                          | 2.05                              | 40.23                          | 2.05                                  | 40.23                          |
| 21       | 1.02                                            | 21.20                          | 1.02                                                                                             | 21.21                          | 1.03                              | 21.41                          | 1.03                                  | 21.40                          |
| 22       | 5.15                                            | 138.31                         | 5.15                                                                                             | 138.30                         | 5.17                              | 138.09                         | 5.17                                  | 138.07                         |
| 23       | 5.02                                            | 129.24                         | 5.02                                                                                             | 129.27                         | 5.03                              | 129.46                         | 5.03                                  | 129.47                         |
| 24       | 1.53                                            | 51.22                          | 1.53                                                                                             | 51.23 <sup>a</sup>             | 1.53                              | 51.21 <sup>a</sup>             | 1.53                                  | 51.20                          |
| 25       | 1.53                                            | 31.86                          | 1.53                                                                                             | 31.87                          | 1.53                              | 31.87                          | 1.53                                  | 31.87                          |
| 26       | 0.80                                            | 18.96                          | 0.79                                                                                             | 18.99 <sup>b</sup>             | 0.79                              | 18.97 <sup>b</sup>             | 0.80                                  | 18.99                          |
| 27       | 0.85                                            | 21.07                          | 0.85                                                                                             | 21.08 <sup>c</sup>             | 0.85                              | 21.04 <sup>c</sup>             | 0.85                                  | 21.04                          |
| 28       | 1.42, 1.16                                      | 25.39                          | 1.42, 1.17                                                                                       | 25.40 <sup>d</sup>             | 1.42, 1.17                        | 25.35 <sup>d</sup>             | 1.42, 1.17                            | 25.35                          |
| 29       | 0.80                                            | 12.23                          | 0.80                                                                                             | 12.24                          | 0.80                              | 12.24                          | 0.80                                  | 12.23                          |

<sup>a, b, c, d</sup> Groups of resonances ambiguously assigned (could be interchanged within the group)

Table S10. <sup>1</sup>H and <sup>13</sup>C NMR chemical shifts of synthesized **3**, **6** and **30** steroids

| Atom No. | 3 $\beta$ ,3' $\beta$ -di(cholest-5-en-7-one-3 $\beta$ -yl) ether<br>(di(7-ketocholesteryl) ether) (7) |                                | 3 $\beta$ ,3' $\beta$ -di(sitost-5-en-7-one-3 $\beta$ -yl) ether<br>(di(7-ketositosteryl) ether) (8) |                                | 3 $\beta$ ,3' $\beta$ -di(stigmast-5-en-7-one-3 $\beta$ -yl) ether<br>(di(7-ketostigmasteryl) ether) (9) |                                |
|----------|--------------------------------------------------------------------------------------------------------|--------------------------------|------------------------------------------------------------------------------------------------------|--------------------------------|----------------------------------------------------------------------------------------------------------|--------------------------------|
|          | <sup>1</sup> H NMR $\delta$ (ppm)                                                                      | <sup>13</sup> C $\delta$ (ppm) | <sup>1</sup> H NMR $\delta$ (ppm)                                                                    | <sup>13</sup> C $\delta$ (ppm) | <sup>1</sup> H NMR $\delta$ (ppm)                                                                        | <sup>13</sup> C $\delta$ (ppm) |
| 1        | 1.04, 1.86                                                                                             | 37.31                          | 1.16, 1.95                                                                                           | 36.33                          | 1.16, 1.95                                                                                               | 36.34                          |
| 2        | 1.82, 1.50                                                                                             | 29.30                          | 1.93, 1.57                                                                                           | 28.94                          | 1.93, 1.59                                                                                               | 28.94                          |
| 3        | 3.29                                                                                                   | 76.87                          | 3.41                                                                                                 | 75.62                          | 3.41                                                                                                     | 75.62                          |
| 4        | 2.27, 2.23                                                                                             | 39.98                          | 2.47, 2.38                                                                                           | 39.88                          | 2.48, 2.38                                                                                               | 39.89                          |
| 5        | -                                                                                                      | 140.96                         | -                                                                                                    | 165.16                         | -                                                                                                        | 165.13                         |
| 6        | 5.34                                                                                                   | 121.66                         | 5.67                                                                                                 | 126.07                         | 5.67                                                                                                     | 126.06                         |
| 7        | 1.51, 1.97                                                                                             | 31.94                          | -                                                                                                    | 202.24                         | -                                                                                                        | 202.14                         |
| 8        | 1.45                                                                                                   | 31.89                          | 2.23                                                                                                 | 45.39                          | 2.23                                                                                                     | 45.37                          |
| 9        | 0.92                                                                                                   | 50.22                          | 1.48                                                                                                 | 49.97                          | 1.49                                                                                                     | 49.99                          |
| 10       | -                                                                                                      | 36.83                          | -                                                                                                    | 38.54                          | -                                                                                                        | 38.55                          |
| 11       | 1.45, 1.49                                                                                             | 21.06                          | 1.56, 1.56                                                                                           | 21.19                          | 1.57, 1.57                                                                                               | 21.18                          |
| 12       | 1.15, 2.01                                                                                             | 39.77                          | 1.12, 2.03                                                                                           | 38.69                          | 1.14, 2.00                                                                                               | 38.58                          |
| 13       | -                                                                                                      | 42.32                          | -                                                                                                    | 43.08                          | -                                                                                                        | 42.97                          |
| 14       | 0.99                                                                                                   | 56.77                          | 1.33                                                                                                 | 49.95                          | 1.34                                                                                                     | 50.02                          |
| 15       | 1.06, 1.57                                                                                             | 24.29                          | 1.24, 2.40                                                                                           | 26.31                          | 1.23, 2.37                                                                                               | 26.39                          |
| 16       | 1.82, 1.26                                                                                             | 28.23                          | 1.90, 1.27                                                                                           | 28.54                          | 1.77, 1.27                                                                                               | 29.03                          |
| 17       | 1.09                                                                                                   | 56.15                          | 1.09                                                                                                 | 54.68                          | 1.14                                                                                                     | 54.69                          |
| 18       | 0.676                                                                                                  | 11.85                          | 0.68                                                                                                 | 11.96                          | 0.69                                                                                                     | 12.18                          |
| 19       | 1.00                                                                                                   | 19.37                          | 1.18                                                                                                 | 17.26                          | 1.19                                                                                                     | 17.27                          |
| 20       | 1.37                                                                                                   | 35.78                          | 1.35                                                                                                 | 36.06                          | 2.05                                                                                                     | 40.23                          |
| 21       | 0.91                                                                                                   | 18.72                          | 0.92                                                                                                 | 18.91                          | 1.02                                                                                                     | 21.40                          |
| 22       | 1.34, 1.00                                                                                             | 36.18                          | 1.33, 1.02                                                                                           | 33.93                          | 5.17                                                                                                     | 138.07                         |
| 23       | 1.34, 1.14                                                                                             | 23.82                          | 1.15                                                                                                 | 26.06                          | 5.03                                                                                                     | 129.48                         |
| 24       | 1.12, 1.12                                                                                             | 39.52                          | 0.92                                                                                                 | 45.81                          | 1.53                                                                                                     | 51.20                          |
| 25       | 1.52                                                                                                   | 28.01 <sup>a</sup>             | 1.66                                                                                                 | 29.11                          | 1.53                                                                                                     | 31.87                          |
| 26       | 0.86                                                                                                   | 22.56 <sup>b</sup>             | 0.81                                                                                                 | 19.03                          | 0.79                                                                                                     | 18.99                          |
| 27       | 0.87                                                                                                   | 22.81 <sup>c</sup>             | 0.83                                                                                                 | 19.78                          | 0.84                                                                                                     | 21.04                          |
| 28       | -                                                                                                      | -                              | 1.24                                                                                                 | 23.04                          | 1.41, 1.15                                                                                               | 25.35                          |
| 29       | -                                                                                                      | -                              | 0.84                                                                                                 | 11.96                          | 0.80                                                                                                     | 12.23                          |

<sup>a</sup>, <sup>b</sup>, <sup>c</sup> Groups of resonances ambiguously assigned (could be interchanged within the group)

Table S11. <sup>1</sup>H and <sup>13</sup>C NMR chemical shifts of synthesized **7**, **8** and **9** steroids

| Atom No. | Cholest-5-en-3 $\beta$ ,7 $\alpha$ -diol-cholesterol ether<br>(7 $\alpha$ -hydroxycholesteryl-cholesterol ether) (10) |                                   |                                      |                                   | Sitost-5-en-3 $\beta$ ,7 $\alpha$ -diol-sitosterol ether<br>(7 $\alpha$ -hydroxysitosteryl-sitosterol ether) (11) |                                   |                                      |                                   | Stigmast-5-en-3 $\beta$ ,7 $\alpha$ -diol-stigmasterol ether<br>(7 $\alpha$ -hydroxystigmasteryl-stigmasterol ether) (12) |                                   |                                      |                                   |
|----------|-----------------------------------------------------------------------------------------------------------------------|-----------------------------------|--------------------------------------|-----------------------------------|-------------------------------------------------------------------------------------------------------------------|-----------------------------------|--------------------------------------|-----------------------------------|---------------------------------------------------------------------------------------------------------------------------|-----------------------------------|--------------------------------------|-----------------------------------|
|          | <i>sterol part</i>                                                                                                    |                                   | <i>7-hydroxysterol part</i>          |                                   | <i>sterol part</i>                                                                                                |                                   | <i>7-hydroxysterol part</i>          |                                   | <i>sterol part</i>                                                                                                        |                                   | <i>7-hydroxysterol part</i>          |                                   |
|          | <sup>1</sup> H NMR<br>$\delta$ (ppm)                                                                                  | <sup>13</sup> C<br>$\delta$ (ppm) | <sup>1</sup> H NMR<br>$\delta$ (ppm) | <sup>13</sup> C<br>$\delta$ (ppm) | <sup>1</sup> H NMR<br>$\delta$ (ppm)                                                                              | <sup>13</sup> C<br>$\delta$ (ppm) | <sup>1</sup> H NMR<br>$\delta$ (ppm) | <sup>13</sup> C<br>$\delta$ (ppm) | <sup>1</sup> H NMR<br>$\delta$ (ppm)                                                                                      | <sup>13</sup> C<br>$\delta$ (ppm) | <sup>1</sup> H NMR<br>$\delta$ (ppm) | <sup>13</sup> C<br>$\delta$ (ppm) |
| 1        | 1.04, 1.86                                                                                                            | 37.31                             | 1.16, 1.94                           | 36.47                             | 1.03, 1.84                                                                                                        | 37.39                             | 1.07, 1.85                           | 37.20                             | 1.04, 1.85                                                                                                                | 37.39                             | 1.08, 1.86                           | 37.19                             |
| 2        | 1.82, 1.50                                                                                                            | 29.30                             | 1.93, 1.59                           | 29.14                             | 1.81, 1.48                                                                                                        | 29.38                             | 1.84, 1.50                           | 29.20                             | 1.83, 1.49                                                                                                                | 29.39                             | 1.85, 1.51                           | 29.21                             |
| 3        | 3.29                                                                                                                  | 76.87                             | 3.41                                 | 75.05                             | 3.27                                                                                                              | 76.51                             | 3.34                                 | 75.85                             | 3.27                                                                                                                      | 76.50                             | 3.34                                 | 75.84                             |
| 4        | 2.27, 2.23                                                                                                            | 39.98                             | 2.49, 2.37                           | 39.90                             | 2.28, 2.21                                                                                                        | 39.99                             | 2.33, 2.26                           | 39.90                             | 2.27, 2.21                                                                                                                | 39.99                             | 2.33, 2.25                           | 39.90                             |
| 5        | -                                                                                                                     | 140.96                            | -                                    | 165.63                            | -                                                                                                                 | 141.17                            | -                                    | 146.80                            | -                                                                                                                         | 141.15                            | -                                    | 146.75                            |
| 6        | 5.34                                                                                                                  | 121.66                            | 5.67                                 | 125.93                            | 5.33                                                                                                              | 121.46                            | 5.58                                 | 123.52                            | 5.33                                                                                                                      | 121.45                            | 5.58                                 | 123.51                            |
| 7        | 1.51, 1.97                                                                                                            | 31.94                             | -                                    | 202.33                            | 1.52, 1.97                                                                                                        | 31.96                             | 3.85                                 | 65.40                             | 1.50, 1.97                                                                                                                | 31.94                             | 3.84                                 | 65.35                             |
| 8        | 1.45                                                                                                                  | 31.89                             | 2.23                                 | 45.39                             | 1.44                                                                                                              | 31.90                             | 1.45                                 | 37.51                             | 1.45                                                                                                                      | 31.89                             | 1.46                                 | 37.50                             |
| 9        | 0.92                                                                                                                  | 50.22                             | 1.48                                 | 50.01                             | 0.91                                                                                                              | 50.23                             | 1.21                                 | 42.32                             | 0.92                                                                                                                      | 50.25                             | 1.22                                 | 42.34                             |
| 10       | -                                                                                                                     | 36.83                             | -                                    | 38.59                             | -                                                                                                                 | 36.84                             | -                                    | 37.73                             | -                                                                                                                         | 36.85                             | -                                    | 37.73                             |
| 11       | 1.45, 1.49                                                                                                            | 21.06                             | 1.57, 1.57                           | 21.19                             | 1.45, 1.49                                                                                                        | 21.06                             | 1.48, 1.52                           | 20.69                             | 1.45, 1.50                                                                                                                | 21.04                             | 1.48, 1.53                           | 20.68                             |
| 12       | 1.15, 2.01                                                                                                            | 39.77                             | 1.12, 2.03                           | 38.73                             | 1.15, 2.00                                                                                                        | 39.78                             | 1.16, 1.99                           | 39.19                             | 1.17, 1.98                                                                                                                | 39.69                             | 1.19, 1.97                           | 39.10                             |
| 13       | -                                                                                                                     | 42.32                             | -                                    | 43.09                             | -                                                                                                                 | 42.32                             | -                                    | 42.14                             | -                                                                                                                         | 42.21                             | -                                    | 42.04                             |
| 14       | 0.99                                                                                                                  | 56.77                             | 1.33                                 | 49.97                             | 0.98                                                                                                              | 56.78                             | 1.43                                 | 49.45                             | 1.01                                                                                                                      | 56.88                             | 1.44                                 | 49.51                             |
| 15       | 1.06, 1.57                                                                                                            | 24.29                             | 1.24, 2.40                           | 26.31                             | 1.06, 1.57                                                                                                        | 24.29                             | 1.13, 1.70                           | 24.29                             | 1.03, 1.55                                                                                                                | 24.35                             | 1.12, 1.67                           | 24.36                             |
| 16       | 1.82, 1.26                                                                                                            | 28.23                             | 1.89, 1.27                           | 28.55                             | 1.83, 1.26                                                                                                        | 28.24                             | 1.90, 1.30                           | 28.28                             | 1.70, 1.24                                                                                                                | 28.92                             | 1.77, 1.27                           | 28.94                             |
| 17       | 1.09                                                                                                                  | 56.15                             | 1.08                                 | 54.80                             | 1.10                                                                                                              | 56.05                             | 1.17                                 | 55.71                             | 1.14                                                                                                                      | 55.96                             | 1.21                                 | 55.77                             |
| 18       | 0.676                                                                                                                 | 11.85                             | 0.679                                | 11.96                             | 0.673                                                                                                             | 11.85                             | 0.679                                | 11.62                             | 0.69                                                                                                                      | 12.04                             | 0.70                                 | 11.81                             |
| 19       | 1.00                                                                                                                  | 19.37                             | 1.18                                 | 17.27                             | 0.996                                                                                                             | 19.37                             | 0.982                                | 18.22                             | 1.00                                                                                                                      | 19.38                             | 0.98                                 | 18.22                             |
| 20       | 1.37                                                                                                                  | 35.78                             | 1.37                                 | 35.70                             | 1.35                                                                                                              | 36.15                             | 1.35                                 | 36.13                             | 2.04                                                                                                                      | 40.48                             | 2.04                                 | 40.44                             |
| 21       | 0.91                                                                                                                  | 18.72                             | 0.92                                 | 18.87                             | 0.917                                                                                                             | 18.77                             | 0.929                                | 18.80                             | 1.02                                                                                                                      | 21.21                             | 1.03                                 | 21.21                             |
| 22       | 1.34, 1.00                                                                                                            | 36.18                             | 1.34, 1.00                           | 36.18                             | 1.31, 1.00                                                                                                        | 33.94                             | 1.31, 1.00                           | 33.92                             | 5.15                                                                                                                      | 138.32                            | 5.16                                 | 138.23                            |
| 23       | 1.34, 1.14                                                                                                            | 23.82                             | 1.34, 1.14                           | 23.82                             | 1.15                                                                                                              | 26.08                             | 1.15                                 | 26.08                             | 5.01                                                                                                                      | 129.25*                           | 5.01                                 | 129.32*                           |
| 24       | 1.12, 1.12                                                                                                            | 39.52                             | 1.12, 1.12                           | 39.47                             | 0.92                                                                                                              | 45.82                             | 0.92                                 | 45.82                             | 1.52                                                                                                                      | 51.23                             | 1.52                                 | 51.23                             |
| 25       | 1.52                                                                                                                  | 28.01 <sup>a</sup>                | 1.51                                 | 27.99 <sup>a</sup>                | 1.66                                                                                                              | 29.14                             | 1.66                                 | 29.14                             | 1.52                                                                                                                      | 31.87                             | 1.52                                 | 31.87                             |
| 26       | 0.86                                                                                                                  | 22.56 <sup>b</sup>                | 0.86                                 | 22.55 <sup>b</sup>                | 0.81                                                                                                              | 19.03                             | 0.81                                 | 19.03                             | 0.79                                                                                                                      | 18.98                             | 0.79                                 | 18.98                             |
| 27       | 0.87                                                                                                                  | 22.81 <sup>c</sup>                | 0.87                                 | 22.80 <sup>c</sup>                | 0.83                                                                                                              | 19.81                             | 0.83                                 | 19.81                             | 0.84                                                                                                                      | 21.08                             | 0.84                                 | 21.08                             |
| 28       | -                                                                                                                     | -                                 | -                                    | -                                 | 1.24                                                                                                              | 23.05                             | 1.24                                 | 23.05                             | 1.41, 1.16                                                                                                                | 25.40                             | 1.41, 1.16                           | 25.40                             |
| 29       | -                                                                                                                     | -                                 | -                                    | -                                 | 0.84                                                                                                              | 11.97                             | 0.84                                 | 11.97                             | 0.80                                                                                                                      | 12.25                             | 0.80                                 | 12.25                             |

<sup>a, b, c</sup> Groups of resonances ambiguously assigned (could be interchanged within the group)

Table S12. <sup>1</sup>H and <sup>13</sup>C NMR chemical shifts of synthesized **10**, **11** and **12** steroids

| Atom<br>No. | Cholest-5-en-3 $\beta$ ,7 $\beta$ -diol-cholesterol ether<br>(7 $\beta$ -hydroxycholesteryl-cholesterol ether) ( <b>13</b> ) |                                   |                                      |                                   | Sito-5-en-3 $\beta$ ,7 $\beta$ -diol-sitosterol ether<br>(7 $\beta$ -hydroxysitosteryl-sitosterol ether) ( <b>14</b> ) |                                   |                                      |                                   | Stigma-5-en-3 $\beta$ ,7 $\beta$ -diol-stigmasterol ether<br>(7 $\beta$ -hydroxystigmasteryl-stigmasterol ether) ( <b>15</b> ) |                                   |                                      |                                   |
|-------------|------------------------------------------------------------------------------------------------------------------------------|-----------------------------------|--------------------------------------|-----------------------------------|------------------------------------------------------------------------------------------------------------------------|-----------------------------------|--------------------------------------|-----------------------------------|--------------------------------------------------------------------------------------------------------------------------------|-----------------------------------|--------------------------------------|-----------------------------------|
|             | <i>sterol part</i>                                                                                                           |                                   | <i>7-hydroxysterol part</i>          |                                   | <i>sterol part</i>                                                                                                     |                                   | <i>7-hydroxysterol part</i>          |                                   | <i>sterol part</i>                                                                                                             |                                   | <i>7-hydroxysterol part</i>          |                                   |
|             | <sup>1</sup> H NMR<br>$\delta$ (ppm)                                                                                         | <sup>13</sup> C<br>$\delta$ (ppm) | <sup>1</sup> H NMR<br>$\delta$ (ppm) | <sup>13</sup> C<br>$\delta$ (ppm) | <sup>1</sup> H NMR<br>$\delta$ (ppm)                                                                                   | <sup>13</sup> C<br>$\delta$ (ppm) | <sup>1</sup> H NMR<br>$\delta$ (ppm) | <sup>13</sup> C<br>$\delta$ (ppm) | <sup>1</sup> H NMR<br>$\delta$ (ppm)                                                                                           | <sup>13</sup> C<br>$\delta$ (ppm) | <sup>1</sup> H NMR<br>$\delta$ (ppm) | <sup>13</sup> C<br>$\delta$ (ppm) |
| 1           | 1.03, 1.84                                                                                                                   | 37.39                             | 1.01, 1.84                           | 37.09                             | 1.03, 1.84                                                                                                             | 37.39                             | 1.01, 1.84                           | 37.09                             | 1.04, 1.85                                                                                                                     | 37.39                             | 1.01, 1.84                           | 37.09                             |
| 2           | 1.82, 1.49                                                                                                                   | 29.37                             | 1.84, 1.50                           | 29.37                             | 1.83, 1.49                                                                                                             | 29.37                             | 1.83, 1.49                           | 29.37                             | 1.83, 1.49                                                                                                                     | 29.38                             | 1.85, 1.51                           | 29.38                             |
| 3           | 3.27                                                                                                                         | 76.49                             | 3.29                                 | 75.97                             | 3.27                                                                                                                   | 76.50                             | 3.29                                 | 75.98                             | 3.27                                                                                                                           | 76.49                             | 3.29                                 | 75.98                             |
| 4           | 2.27, 2.23                                                                                                                   | 40.06                             | 2.31, 2.23                           | 39.58                             | 2.27, 2.22                                                                                                             | 40.06                             | 2.32, 2.23                           | 39.58                             | 2.27, 2.21                                                                                                                     | 40.06                             | 2.32, 2.23                           | 39.57                             |
| 5           | -                                                                                                                            | 141.26                            | -                                    | 144.02                            | -                                                                                                                      | 141.26                            | -                                    | 144.01                            | -                                                                                                                              | 141.25                            | -                                    | 143.97                            |
| 6           | 5.33                                                                                                                         | 121.41                            | 5.26                                 | 125.13                            | 5.33                                                                                                                   | 121.41                            | 5.27                                 | 125.13                            | 5.33                                                                                                                           | 121.39                            | 5.26                                 | 125.11                            |
| 7           | 1.52, 1.97                                                                                                                   | 31.95                             | 3.83                                 | 73.41                             | 1.52, 1.97                                                                                                             | 31.96                             | 3.83                                 | 73.42                             | 1.50, 1.96                                                                                                                     | 31.94                             | 3.83                                 | 73.41                             |
| 8           | 1.43                                                                                                                         | 31.89                             | 1.38                                 | 40.94                             | 1.44                                                                                                                   | 31.90                             | 1.38                                 | 40.95                             | 1.45                                                                                                                           | 31.89                             | 1.39                                 | 40.91                             |
| 9           | 0.91                                                                                                                         | 50.24                             | 1.01                                 | 48.35                             | 0.91                                                                                                                   | 50.24                             | 1.01                                 | 48.35                             | 0.92                                                                                                                           | 50.26                             | 1.02                                 | 48.35                             |
| 10          | -                                                                                                                            | 36.85                             | -                                    | 36.77                             | -                                                                                                                      | 36.85                             | -                                    | 36.77                             | -                                                                                                                              | 36.86                             | -                                    | 36.78                             |
| 11          | 1.45, 1.49                                                                                                                   | 21.05                             | 1.45, 1.49                           | 21.05                             | 1.45, 1.49                                                                                                             | 21.05                             | 1.45, 1.51                           | 21.05                             | 1.45, 1.50                                                                                                                     | 21.04                             | 1.46, 1.53                           | 21.04                             |
| 12          | 1.15, 2.01                                                                                                                   | 39.79                             | 1.13, 2.01                           | 39.58                             | 1.15, 2.00                                                                                                             | 39.78                             | 1.13, 2.01                           | 39.57                             | 1.18, 1.98                                                                                                                     | 39.68                             | 1.16, 1.99                           | 39.47                             |
| 13          | -                                                                                                                            | 42.32                             | -                                    | 42.92                             | -                                                                                                                      | 42.32                             | -                                    | 42.93                             | -                                                                                                                              | 42.21                             | -                                    | 42.82                             |
| 14          | 0.99                                                                                                                         | 56.79                             | 1.14                                 | 55.99                             | 0.98                                                                                                                   | 56.79                             | 1.14                                 | 55.99                             | 1.01                                                                                                                           | 56.88                             | 1.15                                 | 56.06                             |
| 15          | 1.06, 1.57                                                                                                                   | 24.28                             | 1.42, 1.80                           | 26.38                             | 1.06, 1.57                                                                                                             | 24.29                             | 1.42, 1.81                           | 26.39                             | 1.04, 1.54                                                                                                                     | 24.35                             | 1.42, 1.78                           | 26.46                             |
| 16          | 1.82, 1.25                                                                                                                   | 28.22                             | 1.87, 1.30                           | 28.54                             | 1.83, 1.25                                                                                                             | 28.24                             | 1.89, 1.31                           | 28.55                             | 1.70, 1.24                                                                                                                     | 28.91                             | 1.77, 1.31                           | 29.16                             |
| 17          | 1.08                                                                                                                         | 56.15                             | 1.07                                 | 55.46                             | 1.10                                                                                                                   | 56.05                             | 1.09                                 | 55.38                             | 1.14                                                                                                                           | 55.96                             | 1.13                                 | 55.30                             |
| 18          | 0.67                                                                                                                         | 11.85                             | 0.69                                 | 11.81                             | 0.673                                                                                                                  | 11.85                             | 0.688                                | 11.81                             | 0.69                                                                                                                           | 12.04                             | 0.71                                 | 12.02                             |
| 19          | 1.00                                                                                                                         | 19.38                             | 1.04                                 | 19.14                             | 0.997                                                                                                                  | 19.38                             | 1.036                                | 19.14                             | 1.00                                                                                                                           | 19.38                             | 1.04                                 | 19.14                             |
| 20          | 1.37                                                                                                                         | 35.77                             | 1.37                                 | 35.72                             | 1.35                                                                                                                   | 36.13                             | 1.35                                 | 36.09                             | 2.04                                                                                                                           | 40.48                             | 2.04                                 | 40.33                             |
| 21          | 0.91                                                                                                                         | 18.71                             | 0.92                                 | 18.77                             | 0.918                                                                                                                  | 18.78                             | 0.925                                | 18.83                             | 1.02                                                                                                                           | 21.21                             | 1.03                                 | 21.29                             |
| 22          | 1.33, 0.99                                                                                                                   | 36.19 <sup>a</sup>                | 1.33, 0.99                           | 36.20 <sup>a</sup>                | 1.32, 1.01                                                                                                             | 33.94                             | 1.32, 1.01                           | 33.97                             | 5.15                                                                                                                           | 138.31                            | 5.16                                 | 138.13                            |
| 23          | 1.33, 1.13                                                                                                                   | 23.82 <sup>b</sup>                | 1.33, 1.13                           | 23.81 <sup>b</sup>                | 1.15                                                                                                                   | 26.07                             | 1.15                                 | 26.07                             | 5.01                                                                                                                           | 129.26                            | 5.03                                 | 129.46                            |
| 24          | 1.12, 1.12                                                                                                                   | 39.50 <sup>c</sup>                | 1.12, 1.12                           | 39.51 <sup>c</sup>                | 0.92                                                                                                                   | 45.83                             | 0.92                                 | 45.83                             | 1.52                                                                                                                           | 51.23                             | 1.52                                 | 51.23                             |
| 25          | 1.51                                                                                                                         | 28.01                             | 1.51                                 | 28.01                             | 1.66                                                                                                                   | 29.14                             | 1.66                                 | 29.14                             | 1.52                                                                                                                           | 31.87                             | 1.52                                 | 31.87                             |
| 26          | 0.86                                                                                                                         | 22.55                             | 0.86                                 | 22.55                             | 0.81                                                                                                                   | 19.02                             | 0.81                                 | 19.02                             | 0.79                                                                                                                           | 18.99 <sup>a</sup>                | 0.79                                 | 18.97 <sup>a</sup>                |
| 27          | 0.87                                                                                                                         | 22.81                             | 0.87                                 | 22.81                             | 0.83                                                                                                                   | 19.81                             | 0.83                                 | 19.81                             | 0.84                                                                                                                           | 21.06 <sup>b</sup>                | 0.84                                 | 21.08 <sup>b</sup>                |
| 28          | -                                                                                                                            | -                                 | -                                    | -                                 | 1.24                                                                                                                   | 23.06                             | 1.24                                 | 23.06                             | 1.41, 1.16                                                                                                                     | 25.40 <sup>c</sup>                | 1.41, 1.16                           | 25.37 <sup>c</sup>                |
| 29          | -                                                                                                                            | -                                 | -                                    | -                                 | 0.84                                                                                                                   | 11.97                             | 0.84                                 | 11.97                             | 0.80                                                                                                                           | 12.24                             | 0.80                                 | 12.24                             |

<sup>a, b, c</sup> Groups of resonances ambiguously assigned (could be interchanged within the group)

Table S13. <sup>1</sup>H and <sup>13</sup>C NMR chemical shifts of synthesized **13**, **14** and **15** steroids

| Atom<br>No. | (5,6 $\alpha$ -epoxycholesteryl)-cholesterol ether (16) |                                   |                                      |                                   | (5,6 $\alpha$ -epoxysitosteryl)-sitosterol ether (17) |                                   |                                      |                                   | (5,6 $\alpha$ -epoxystigmasteryl)-stigmastrol ether (18) |                                   |                                      |                                   |
|-------------|---------------------------------------------------------|-----------------------------------|--------------------------------------|-----------------------------------|-------------------------------------------------------|-----------------------------------|--------------------------------------|-----------------------------------|----------------------------------------------------------|-----------------------------------|--------------------------------------|-----------------------------------|
|             | <i>sterol part</i>                                      |                                   | <i>5,6-epoxysterol part</i>          |                                   | <i>sterol part</i>                                    |                                   | <i>5,6-epoxysterol part</i>          |                                   | <i>sterol part</i>                                       |                                   | <i>5,6-epoxysterol part</i>          |                                   |
|             | <sup>1</sup> H NMR<br>$\delta$ (ppm)                    | <sup>13</sup> C<br>$\delta$ (ppm) | <sup>1</sup> H NMR<br>$\delta$ (ppm) | <sup>13</sup> C<br>$\delta$ (ppm) | <sup>1</sup> H NMR<br>$\delta$ (ppm)                  | <sup>13</sup> C<br>$\delta$ (ppm) | <sup>1</sup> H NMR<br>$\delta$ (ppm) | <sup>13</sup> C<br>$\delta$ (ppm) | <sup>1</sup> H NMR<br>$\delta$ (ppm)                     | <sup>13</sup> C<br>$\delta$ (ppm) | <sup>1</sup> H NMR<br>$\delta$ (ppm) | <sup>13</sup> C<br>$\delta$ (ppm) |
| 1           | 1.00, 1.82                                              | 37.36                             | 1.32, 1.68                           | 32.53                             | 1.00, 1.82                                            | 37.36                             | 1.32, 1.67                           | 32.53                             | 1.01, 1.82                                               | 37.36                             | 1.33, 1.68                           | 32.54                             |
| 2           | 1.79, 1.45                                              | 29.35                             | 1.91, 1.58                           | 29.03                             | 1.79, 1.44                                            | 29.34                             | 1.91, 1.57                           | 29.04                             | 1.80, 1.45                                               | 29.35                             | 1.91, 1.58                           | 29.05                             |
| 3           | 3.25                                                    | 76.74                             | 3.64                                 | 73.36                             | 3.24                                                  | 76.74                             | 3.64                                 | 73.36                             | 3.24                                                     | 76.75                             | 3.64                                 | 73.36                             |
| 4           | 2.28, 2.20                                              | 40.07                             | 2.04, 1.28                           | 37.95                             | 2.27, 2.20                                            | 40.07                             | 2.04, 1.28                           | 37.95                             | 2.28, 2.20                                               | 40.07                             | 2.04, 1.28                           | 37.95                             |
| 5           | -                                                       | 141.15                            | -                                    | 65.80                             | -                                                     | 141.14                            | -                                    | 65.80                             | -                                                        | 141.14                            | -                                    | 65.80                             |
| 6           | 5.32                                                    | 121.44                            | 2.87                                 | 59.43                             | 5.32                                                  | 121.44                            | 2.87                                 | 59.42                             | 5.32                                                     | 121.42                            | 2.87                                 | 59.41                             |
| 7           | 1.51, 1.96                                              | 31.94                             | 1.47, 1.90                           | 28.92                             | 1.51, 1.96                                            | 31.94                             | 1.47, 1.90                           | 28.92                             | 1.51, 1.96                                               | 31.93                             | 1.47, 1.90                           | 28.91                             |
| 8           | 1.44                                                    | 31.89                             | 1.36                                 | 29.88                             | 1.44                                                  | 31.89                             | 1.35                                 | 29.88                             | 1.44                                                     | 31.89                             | 1.36                                 | 29.88                             |
| 9           | 0.90                                                    | 50.22                             | 1.24                                 | 42.62                             | 0.90                                                  | 50.21                             | 1.23                                 | 42.61                             | 0.91                                                     | 50.23                             | 1.25                                 | 42.64                             |
| 10          | -                                                       | 36.80                             | -                                    | 35.11                             | -                                                     | 36.80                             | -                                    | 35.11                             | -                                                        | 36.81                             | -                                    | 35.12                             |
| 11          | 1.44, 1.48                                              | 21.05                             | 1.24, 1.36                           | 20.61                             | 1.43, 1.47                                            | 21.05                             | 1.24, 1.36                           | 20.61                             | 1.45, 1.49                                               | 21.04                             | 1.25, 1.38                           | 20.60                             |
| 12          | 1.15, 2.00                                              | 39.78                             | 1.12, 1.94                           | 39.43                             | 1.15, 2.00                                            | 39.77                             | 1.10, 1.94                           | 39.43                             | 1.17, 1.98                                               | 39.68                             | 1.13, 1.92                           | 39.33                             |
| 13          | -                                                       | 42.31                             | -                                    | 42.33                             | -                                                     | 42.31                             | -                                    | 42.33                             | -                                                        | 42.20                             | -                                    | 42.22                             |
| 14          | 0.99                                                    | 56.76                             | 0.96                                 | 56.87                             | 0.98                                                  | 56.76                             | 0.96                                 | 56.87                             | 1.01                                                     | 56.86                             | 0.97                                 | 56.96                             |
| 15          | 1.05, 1.57                                              | 24.28                             | 0.97, 1.55                           | 24.04                             | 1.06, 1.57                                            | 24.29                             | 0.97, 1.55                           | 24.05                             | 1.03, 1.55                                               | 24.35                             | 0.98, 1.53                           | 24.11                             |
| 16          | 1.82, 1.24                                              | 28.22                             | 1.81, 1.22                           | 28.07                             | 1.83, 1.24                                            | 28.24                             | 1.82, 1.22                           | 28.09                             | 1.70, 1.25                                               | 28.91                             | 1.68, 1.23                           | 28.74                             |
| 17          | 1.08                                                    | 56.14                             | 1.05                                 | 55.87                             | 1.09                                                  | 56.04                             | 1.06                                 | 55.78                             | 1.14                                                     | 55.95                             | 1.11                                 | 55.65                             |
| 18          | 0.67                                                    | 11.84                             | 0.60                                 | 11.84                             | 0.67                                                  | 11.84                             | 0.60                                 | 11.84                             | 0.69                                                     | 12.03                             | 0.62                                 | 12.03                             |
| 19          | 0.98                                                    | 19.37                             | 1.05                                 | 15.88                             | 0.98                                                  | 19.37                             | 1.04                                 | 15.88                             | 0.99                                                     | 19.37                             | 1.05                                 | 15.88                             |
| 20          | 1.36                                                    | 35.77                             | 1.34                                 | 35.74                             | 1.35                                                  | 36.13                             | 1.32                                 | 36.13                             | 2.04                                                     | 40.48                             | 2.01                                 | 40.44                             |
| 21          | 0.91                                                    | 18.70                             | 0.88                                 | 18.63                             | 0.91                                                  | 18.77                             | 0.89                                 | 18.70                             | 1.02                                                     | 21.20                             | 0.99                                 | 21.15                             |
| 22          | 1.33, 0.98                                              | 36.18                             | 1.33, 0.98                           | 36.14                             | 1.31, 1.00                                            | 33.94                             | 1.31, 1.00                           | 33.90                             | 5.15                                                     | 138.33                            | 5.13                                 | 138.23                            |
| 23          | 1.32, 1.13                                              | 23.82                             | 1.32, 1.13                           | 23.82                             | 1.15                                                  | 26.08                             | 1.15                                 | 26.08                             | 5.02                                                     | 129.24                            | 4.99                                 | 129.30                            |
| 24          | 1.11, 1.11                                              | 39.50                             | 1.11, 1.11                           | 39.50                             | 0.92                                                  | 45.82                             | 0.92                                 | 45.82                             | 1.52                                                     | 51.23                             | 1.52                                 | 51.20                             |
| 25          | 1.51                                                    | 28.00                             | 1.51                                 | 28.00                             | 1.66                                                  | 29.14                             | 1.66                                 | 29.14                             | 1.53                                                     | 31.87                             | 1.53                                 | 31.86                             |
| 26          | 0.86                                                    | 22.55                             | 0.86                                 | 22.55                             | 0.81                                                  | 19.03                             | 0.81                                 | 19.03                             | 0.80                                                     | 18.97                             | 0.80                                 | 18.97                             |
| 27          | 0.86                                                    | 22.80                             | 0.86                                 | 22.80                             | 0.83                                                  | 19.81                             | 0.83                                 | 19.81                             | 0.85                                                     | 21.07                             | 0.85                                 | 21.07                             |
| 28          |                                                         |                                   |                                      |                                   | 1.24                                                  | 23.05                             | 1.24                                 | 23.05                             | 1.42, 1.16                                               | 25.40                             | 1.42, 1.16                           | 25.38                             |
| 29          |                                                         |                                   |                                      |                                   | 0.84                                                  | 11.97                             | 0.84                                 | 11.97                             | 0.80                                                     | 12.24                             | 0.80                                 | 12.23                             |

<sup>a, b, c</sup> Groups of resonances ambiguously assigned (could be interchanged within the group)

Table S14. <sup>1</sup>H and <sup>13</sup>C NMR chemical shifts of synthesized **16**, **17** and **18** steroids

| Atom No. | (5,6 $\beta$ -epoxycholesteryl)-cholesterol ether (19) |                                   |                                      |                                   | (5,6 $\beta$ -epoxysitosteryl)-sitosterol ether (20) |                                   |                                      |                                   | (5,6 $\beta$ -epoxystigmasteryl)-stigmasterol ether (21) |                                   |                                      |                                   |
|----------|--------------------------------------------------------|-----------------------------------|--------------------------------------|-----------------------------------|------------------------------------------------------|-----------------------------------|--------------------------------------|-----------------------------------|----------------------------------------------------------|-----------------------------------|--------------------------------------|-----------------------------------|
|          | <i>sterol part</i>                                     |                                   | <i>5,6-epoxysterol part</i>          |                                   | <i>sterol part</i>                                   |                                   | <i>5,6-epoxysterol part</i>          |                                   | <i>sterol part</i>                                       |                                   | <i>5,6-epoxysterol part</i>          |                                   |
|          | <sup>1</sup> H NMR<br>$\delta$ (ppm)                   | <sup>13</sup> C<br>$\delta$ (ppm) | <sup>1</sup> H NMR<br>$\delta$ (ppm) | <sup>13</sup> C<br>$\delta$ (ppm) | <sup>1</sup> H NMR<br>$\delta$ (ppm)                 | <sup>13</sup> C<br>$\delta$ (ppm) | <sup>1</sup> H NMR<br>$\delta$ (ppm) | <sup>13</sup> C<br>$\delta$ (ppm) | <sup>1</sup> H NMR<br>$\delta$ (ppm)                     | <sup>13</sup> C<br>$\delta$ (ppm) | <sup>1</sup> H NMR<br>$\delta$ (ppm) | <sup>13</sup> C<br>$\delta$ (ppm) |
| 1        | 1.01, 1.83                                             | 37.37                             | 1.22, 1.94                           | 37.22                             | 1.01, 1.83                                           | 37.38                             | 1.21, 1.94                           | 37.22                             | 1.01, 1.83                                               | 37.38                             | 1.22, 1.94                           | 37.22                             |
| 2        | 1.79, 1.47                                             | 29.33                             | 1.78, 1.40                           | 28.70                             | 1.79, 1.47                                           | 29.34                             | 1.77, 1.40                           | 28.71                             | 1.79, 1.47                                               | 29.34                             | 1.78, 1.40                           | 28.72                             |
| 3        | 3.24                                                   | 76.60                             | 3.45                                 | 73.94                             | 3.23                                                 | 76.75                             | 3.44                                 | 73.95                             | 3.23                                                     | 76.59                             | 3.44                                 | 73.95                             |
| 4        | 2.27, 2.23                                             | 39.99                             | 2.03, 1.39                           | 39.98                             | 2.26, 2.21                                           | 40.00                             | 2.03, 1.39                           | 39.99                             | 2.26, 2.21                                               | 40.00                             | 2.03, 1.39                           | 39.99                             |
| 5        | -                                                      | 141.24                            | -                                    | 63.09                             | -                                                    | 141.25                            | -                                    | 63.06                             | -                                                        | 141.24                            | -                                    | 63.06                             |
| 6        | 5.33                                                   | 121.43                            | 3.03                                 | 63.63                             | 5.33                                                 | 121.42                            | 3.03                                 | 63.61                             | 5.33                                                     | 121.41                            | 3.03                                 | 63.59                             |
| 7        | 1.52, 1.97                                             | 31.95                             | 1.18, 2.07                           | 32.65                             | 1.52, 1.97                                           | 31.95                             | 1.18, 2.07                           | 32.66                             | 1.51, 1.97                                               | 31.94                             | 1.18, 2.07                           | 32.65                             |
| 8        | 1.44                                                   | 31.89                             | 1.47                                 | 29.78                             | 1.44                                                 | 31.89                             | 1.47                                 | 29.78                             | 1.44                                                     | 31.89                             | 1.48                                 | 29.77                             |
| 9        | 0.91                                                   | 50.23                             | 0.59                                 | 51.26                             | 0.91                                                 | 50.23                             | 0.59                                 | 51.27                             | 0.91                                                     | 50.26                             | 0.59                                 | 51.29                             |
| 10       | -                                                      | 36.84                             | -                                    | 35.17                             | -                                                    | 36.84                             | -                                    | 35.18                             | -                                                        | 36.85                             | -                                    | 35.19                             |
| 11       | 1.44, 1.48                                             | 21.04                             | 1.37, 1.37                           | 21.97                             | 1.44, 1.48                                           | 21.05                             | 1.40, 1.36                           | 21.97                             | 1.44, 1.49                                               | 21.03                             | 1.38, 1.38                           | 21.96                             |
| 12       | 1.15, 2.00                                             | 39.77                             | 1.05, 1.95                           | 39.86                             | 1.15, 2.00                                           | 39.77                             | 1.05, 1.95                           | 39.85                             | 1.17, 1.98                                               | 39.68                             | 1.07, 1.93                           | 39.76                             |
| 13       | -                                                      | 42.31                             | -                                    | 42.29                             | -                                                    | 42.32                             | -                                    | 42.29                             | -                                                        | 42.21                             | -                                    | 42.18                             |
| 14       | 0.99                                                   | 56.78                             | 0.85                                 | 56.27                             | 0.98                                                 | 56.78                             | 0.85                                 | 56.28                             | 1.00                                                     | 56.88                             | 0.87                                 | 56.38                             |
| 15       | 1.06, 1.57                                             | 24.28                             | 1.05, 1.57                           | 24.18                             | 1.05, 1.56                                           | 24.29                             | 1.05, 1.56                           | 24.19                             | 1.04, 1.55                                               | 24.35                             | 1.04, 1.55                           | 24.35                             |
| 16       | 1.82, 1.24                                             | 28.22                             | 1.80, 1.24                           | 28.14                             | 1.82, 1.25                                           | 28.24                             | 1.82, 1.24                           | 28.17                             | 1.69, 1.25                                               | 28.91                             | 1.68, 1.24                           | 28.91                             |
| 17       | 1.08                                                   | 56.15                             | 1.05                                 | 56.21                             | 1.09                                                 | 56.05                             | 1.06                                 | 56.11                             | 1.14                                                     | 55.96                             | 1.10                                 | 56.02                             |
| 18       | 0.67                                                   | 11.84                             | 0.63                                 | 11.75                             | 0.67                                                 | 11.84                             | 0.63                                 | 11.75                             | 0.69                                                     | 12.03                             | 0.65                                 | 11.94                             |
| 19       | 0.99                                                   | 19.37                             | 0.98                                 | 17.05                             | 0.99                                                 | 19.37                             | 0.98                                 | 17.05                             | 0.99                                                     | 19.37                             | 0.98                                 | 17.05                             |
| 20       | 1.37                                                   | 35.77                             | 1.35                                 | 35.71                             | 1.35                                                 | 36.13                             | 1.32                                 | 36.07                             | 2.03                                                     | 40.47                             | 2.02                                 | 40.44                             |
| 21       | 0.91                                                   | 18.71                             | 0.89                                 | 18.67                             | 0.92                                                 | 18.77                             | 0.89                                 | 18.73                             | 1.02                                                     | 21.21                             | 0.99                                 | 21.16                             |
| 22       | 1.33, 0.98                                             | 36.18                             | 1.33, 0.98                           | 36.13                             | 1.31, 1.00                                           | 33.94                             | 1.31, 1.00                           | 33.89                             | 5.14                                                     | 138.31                            | 5.13                                 | 138.22                            |
| 23       | 1.32, 1.13                                             | 23.81                             | 1.32, 1.13                           | 23.81                             | 1.15                                                 | 26.05                             | 1.15                                 | 26.05                             | 5.01                                                     | 129.26                            | 5.01                                 | 129.33                            |
| 24       | 1.11, 1.11                                             | 39.50                             | 1.11, 1.11                           | 39.50                             | 0.92                                                 | 45.82                             | 0.92                                 | 45.82                             | 1.52                                                     | 51.23                             | 1.52                                 | 51.23                             |
| 25       | 1.51                                                   | 28.00                             | 1.51                                 | 28.00                             | 1.66                                                 | 29.14                             | 1.66                                 | 29.14                             | 1.52                                                     | 31.87                             | 1.52                                 | 31.87                             |
| 26       | 0.86                                                   | 22.55                             | 0.86                                 | 22.55                             | 0.81                                                 | 19.03                             | 0.81                                 | 19.03                             | 0.79                                                     | 18.97                             | 0.79                                 | 18.97                             |
| 27       | 0.86                                                   | 22.80                             | 0.86                                 | 22.80                             | 0.83                                                 | 19.80                             | 0.83                                 | 19.80                             | 0.84                                                     | 21.08                             | 0.84                                 | 21.08                             |
| 28       |                                                        |                                   |                                      |                                   | 1.24                                                 | 23.05                             | 1.24                                 | 23.05                             | 1.41, 1.16                                               | 25.40                             | 1.41, 1.16                           | 25.40                             |
| 29       |                                                        |                                   |                                      |                                   | 0.84                                                 | 11.97                             | 0.84                                 | 11.97                             | 0.80                                                     | 12.24                             | 0.80                                 | 12.24                             |

<sup>a, b, c</sup> Groups of resonances ambiguously assigned (could be interchanged within the group)

Table S15. <sup>1</sup>H and <sup>13</sup>C NMR chemical shifts of synthesized **19**, **20** and **21** steroids



Pulse Sequence: PROTON (s2pul)  
 Solvent: cdcl3  
 Data collected on: Jan 2 2019

Temp. 25.3 C / 298.4 K  
 Operator: vnmr1

Relax. delay 1.000 sec  
 Pulse 32.8 degrees  
 Acq. time 4.000 sec  
 Width 8012.8 Hz  
 64 repetitions  
 OBSERVE H1, 499.8026298 MHz  
 DATA PROCESSING  
 Line broadening 0.1 Hz  
 FT size 262144  
 Total time 5 min 20 sec

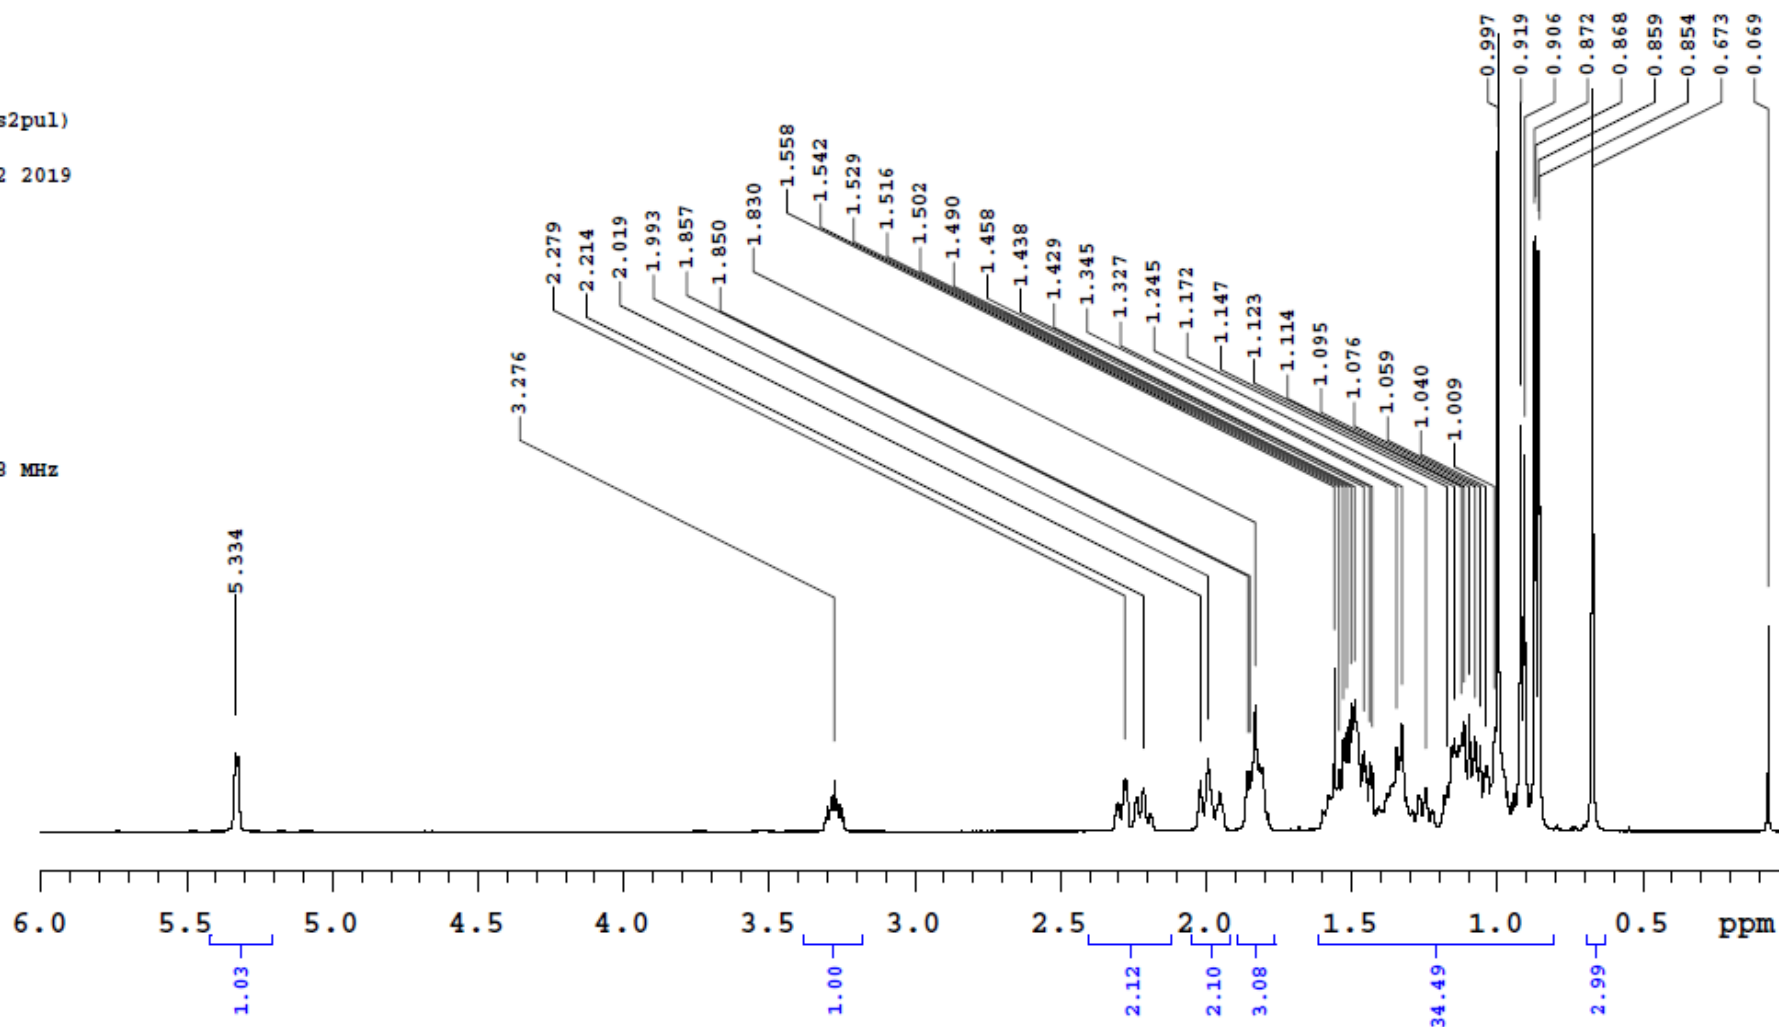

Figure S4. <sup>1</sup>H spectrum of 3β,3'β-dicholesteryl ether (1) in CDCl<sub>3</sub>

Pulse Sequence: CARBON (s2pul)  
Solvent: cdcl3  
Data collected on: Jan 2 2019

Temp. 25.3 C / 298.4 K  
Operator: vnmr1

Relax. delay 0.500 sec  
Pulse 25.0 degrees  
Acq. time 1.200 sec  
Width 37878.8 Hz  
360 repetitions  
OBSERVE C13, 125.6754712 MHz  
DECOUPLE H1, 499.8051288 MHz  
Power 34 dB  
continuously on  
WALTZ-16 modulated  
DATA PROCESSING  
Line broadening 1.0 Hz  
FT size 262144  
Total time 4 hr, 43 min

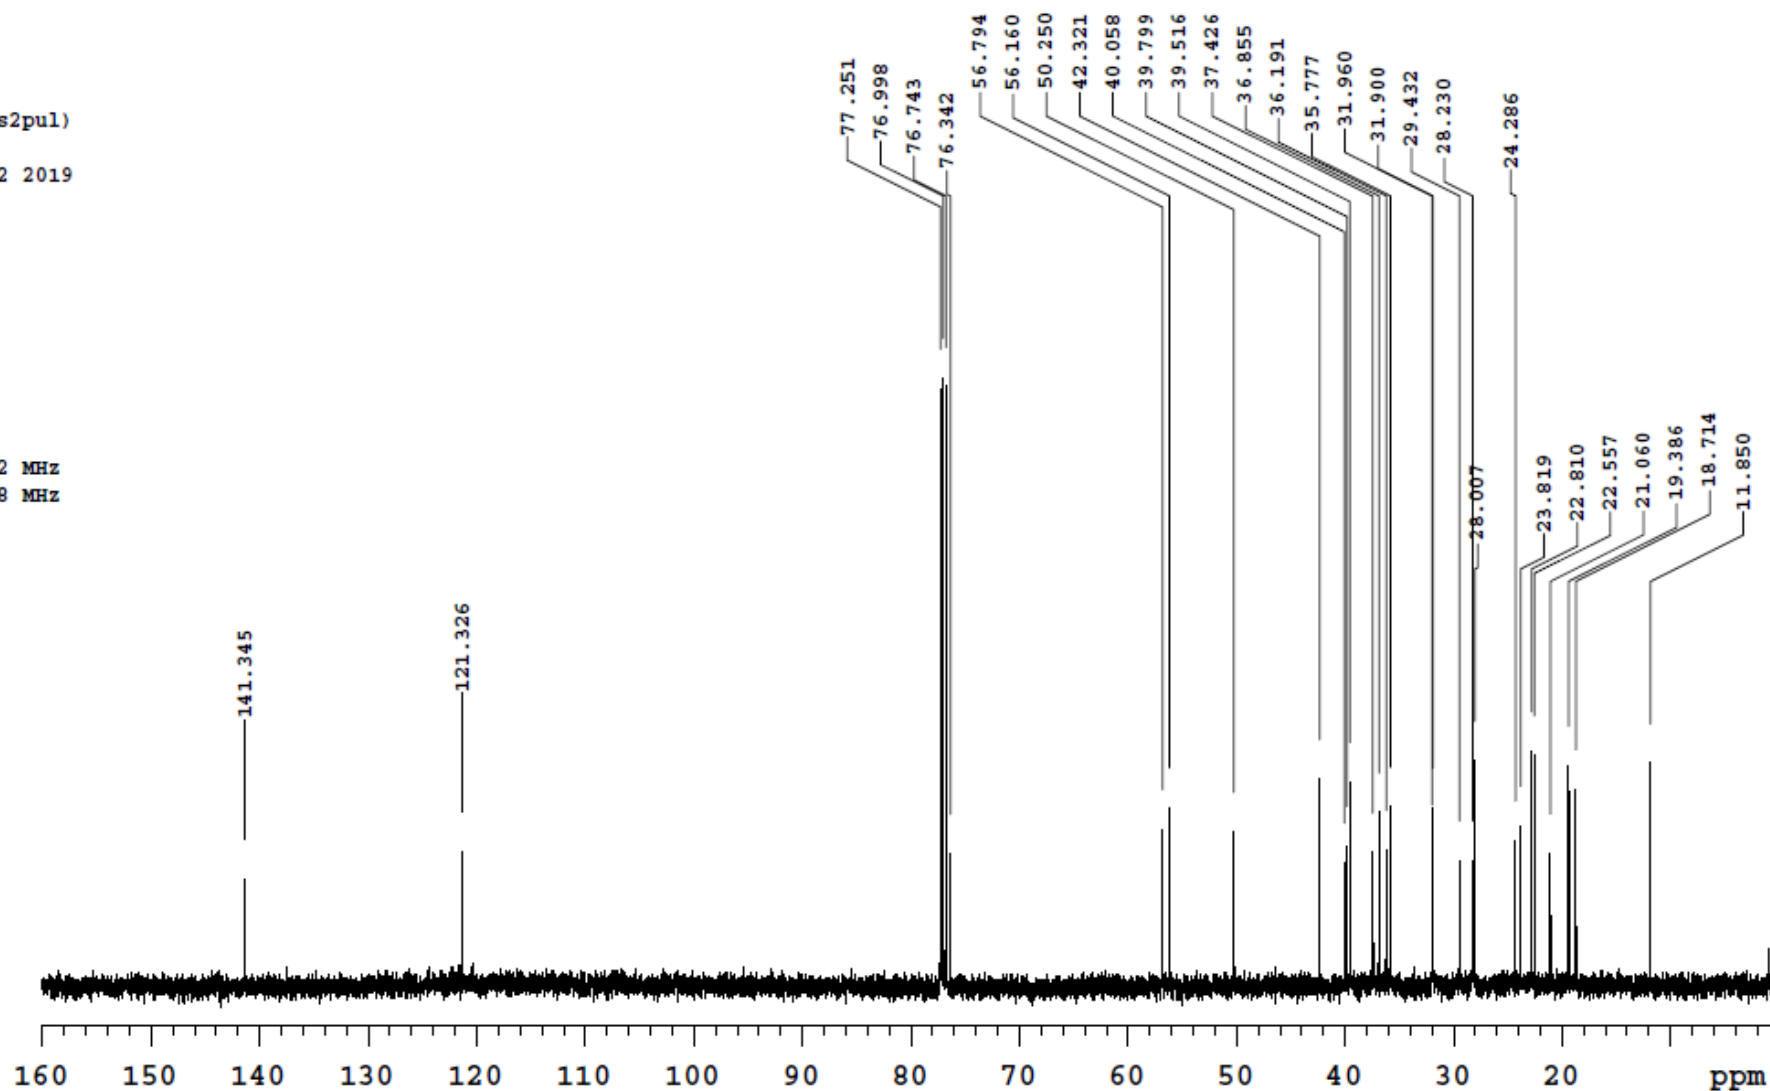

Figure S5. <sup>13</sup>C spectrum of 3β,3'β-dicholesteryl ether (1) in CDCl<sub>3</sub>

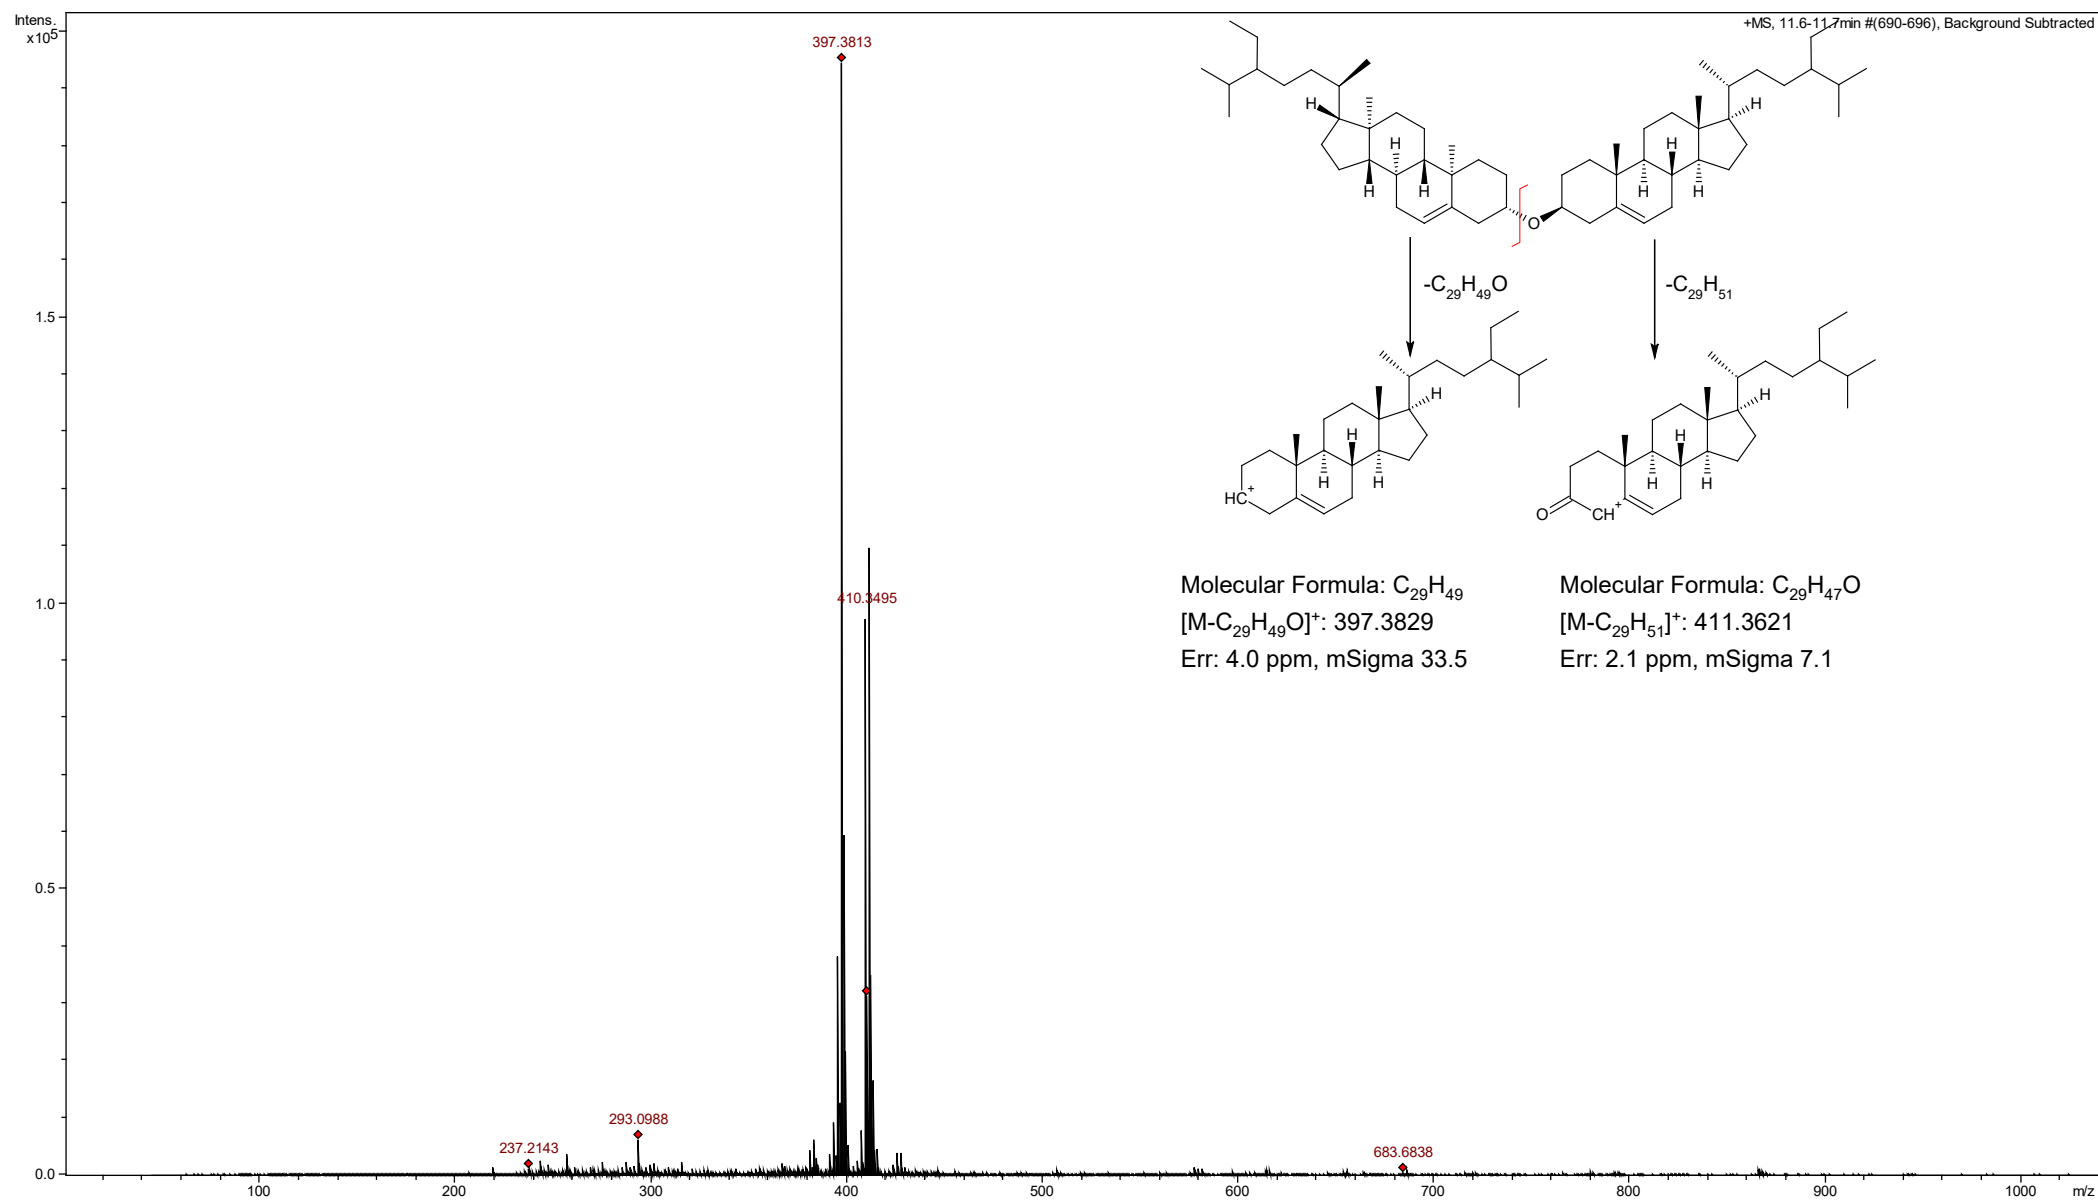

Figure S6. Mass spectrum of 3 $\beta$ ,3' $\beta$ -disitosteryl ether (**2**)

Pulse Sequence: PROTON (s2pul)  
Solvent: cdcl3  
Data collected on: Nov 18 2019

Temp. 25.3 C / 298.4 K  
Operator: vnmr1

Relax. delay 1.000 sec  
Pulse 30.0 degrees  
Acq. time 4.000 sec  
Width 8012.8 Hz  
Single scan

OBSERVE H1, 499.8026293 MHz

DATA PROCESSING

Line broadening 0.1 Hz

FT size 524288

Total time 0 min 5 sec

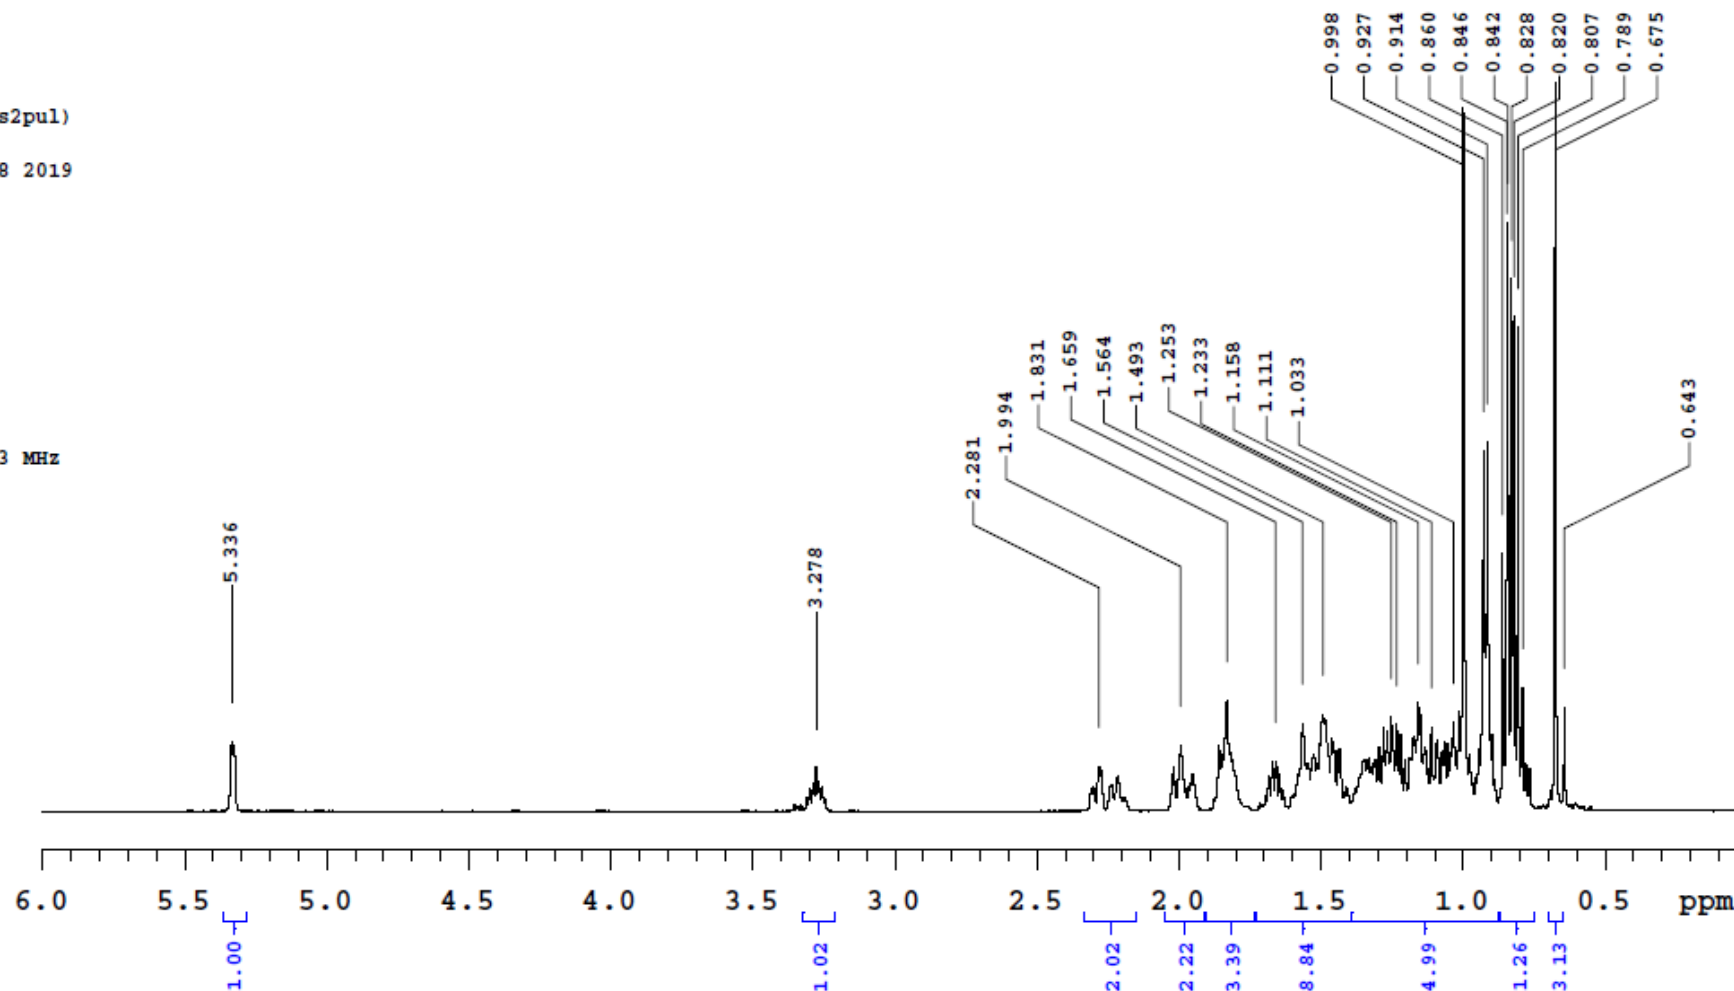

Figure S7.  $^1\text{H}$  spectrum of 3 $\beta$ ,3' $\beta$ -disitosteryl ether (**2**) in  $\text{CDCl}_3$

Pulse Sequence: CARBON (s2pul)  
Solvent: cdcl3  
Data collected on: Nov 18 2019

Temp. 25.3 C / 298.4 K  
Operator: vnmr1

Relax. delay 0.500 sec  
Pulse 34.9 degrees  
Acq. time 1.022 sec  
Width 32051.3 Hz  
20000 repetitions  
OBSERVE C13, 125.6754712 MHz  
DECOUPLE H1, 499.8051288 MHz  
Power 36 dB  
continuously on  
WALTZ-16 modulated  
DATA PROCESSING  
Line broadening 1.0 Hz  
FT size 262144  
Total time 8 hr, 27 min

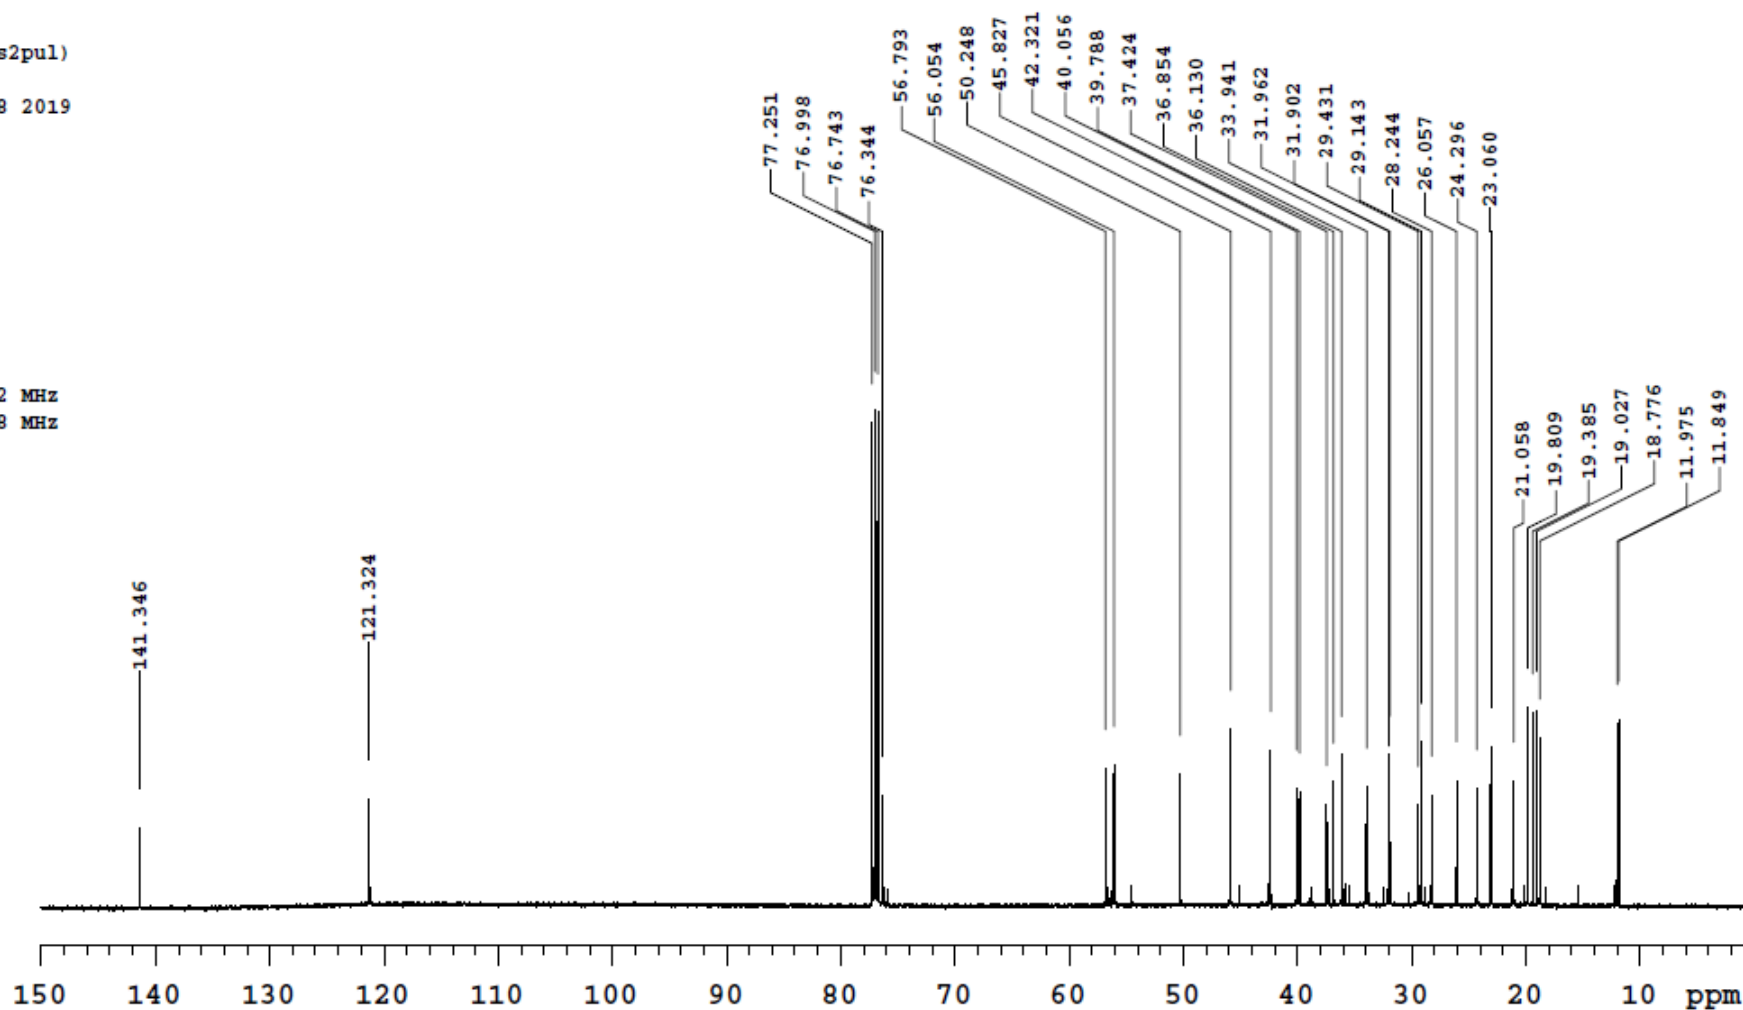

Figure S8. <sup>13</sup>C spectrum of 3β,3'β-disitosteryl ether (2) in CDCl<sub>3</sub>

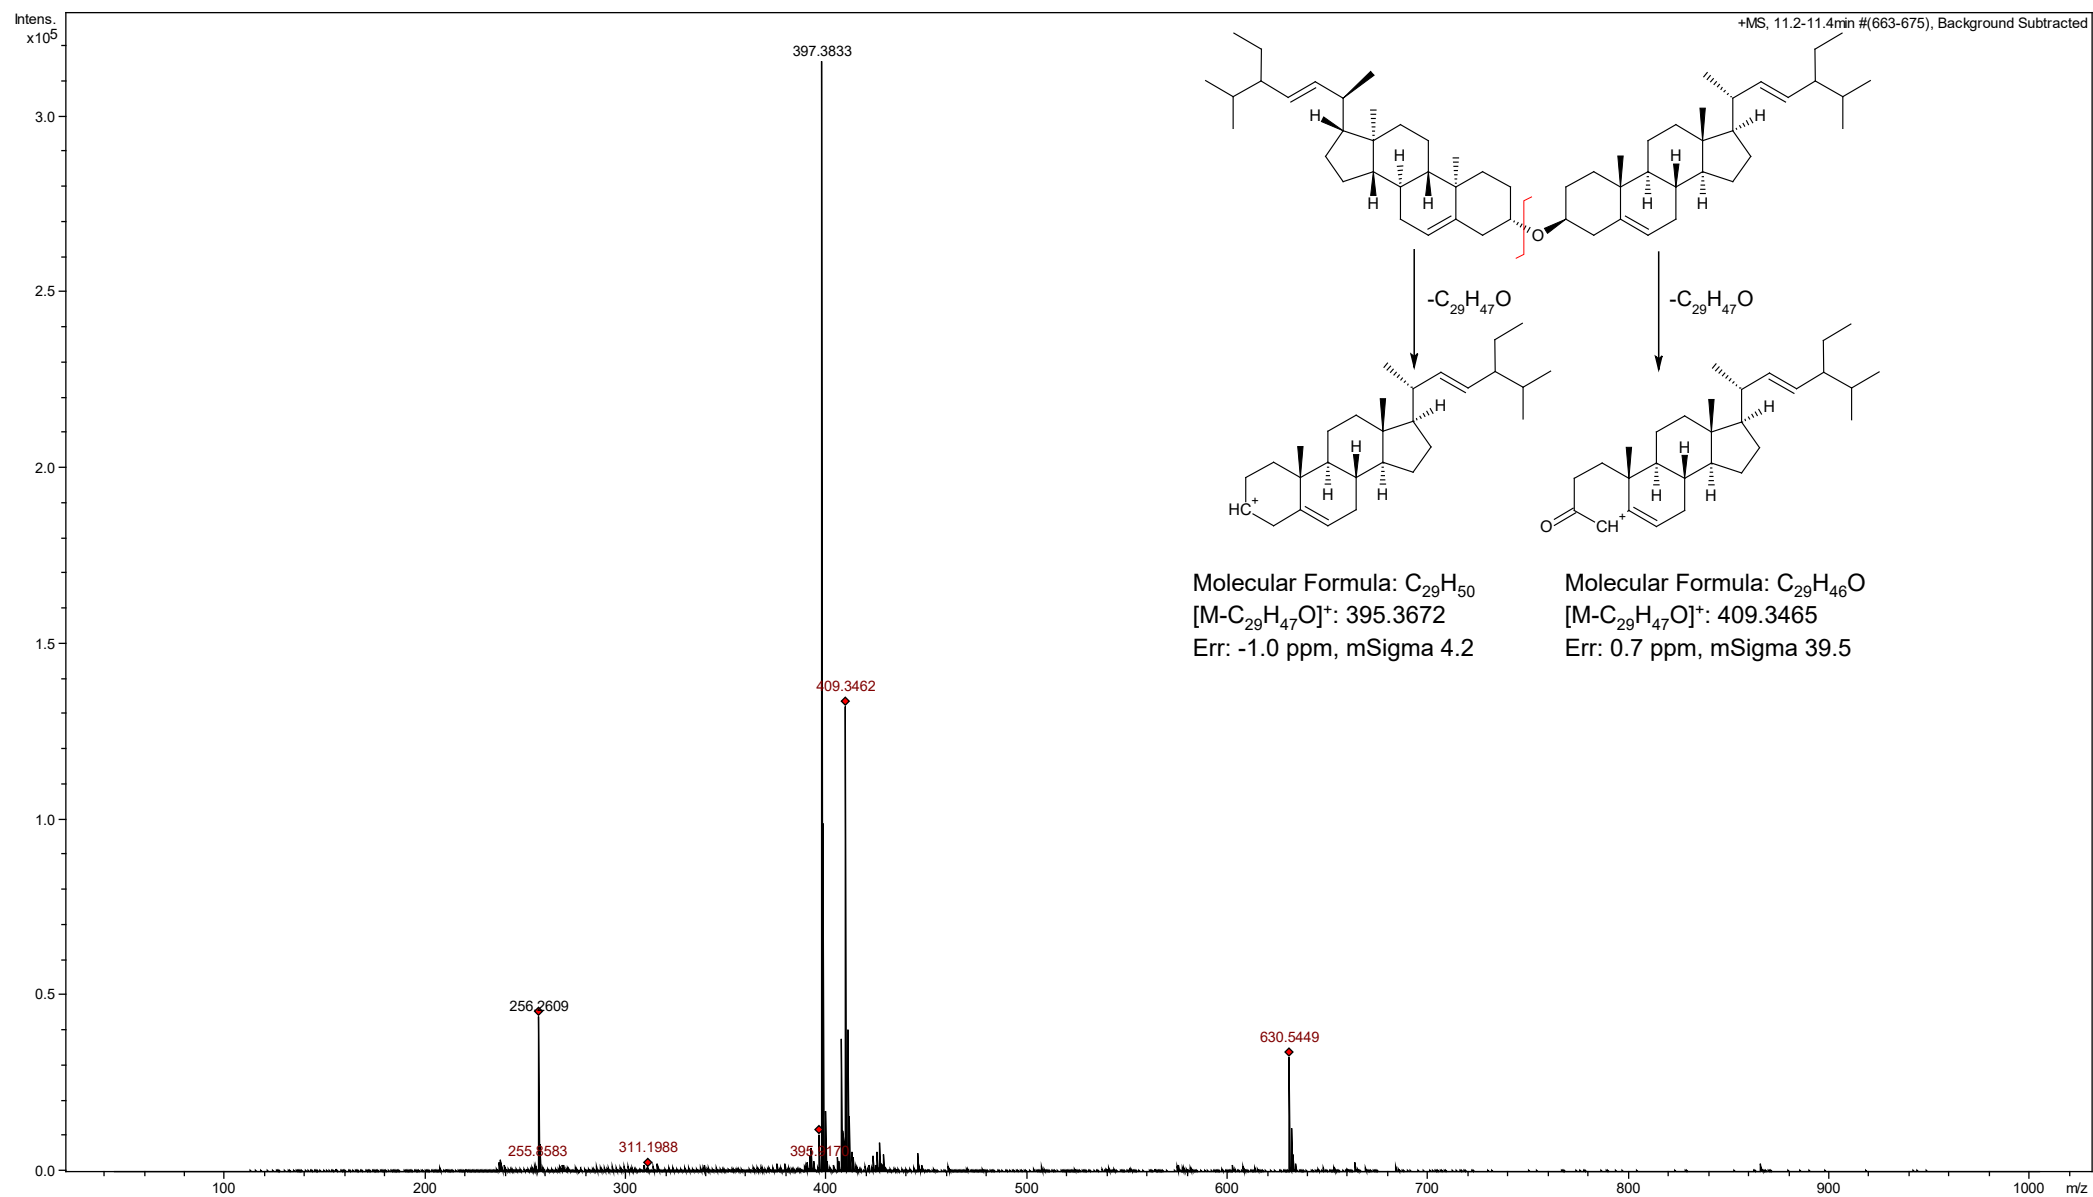

Figure S9. Mass spectrum of 3β,3′β-distigmasteryl ether (3)

Pulse Sequence: PROTON (s2pul)  
 Solvent: cdcl3  
 Data collected on: Nov 14 2019

Temp. 25.0 C / 298.1 K  
 Operator: vnmr1

Relax. delay 1.000 sec  
 Pulse 32.4 degrees  
 Acq. time 4.200 sec  
 Width 6009.6 Hz  
 16 repetitions  
 OBSERVE H1, 599.8350663 MHz  
 DATA PROCESSING  
 Line broadening 0.1 Hz  
 FT size 131072  
 Total time 1 min 23 sec

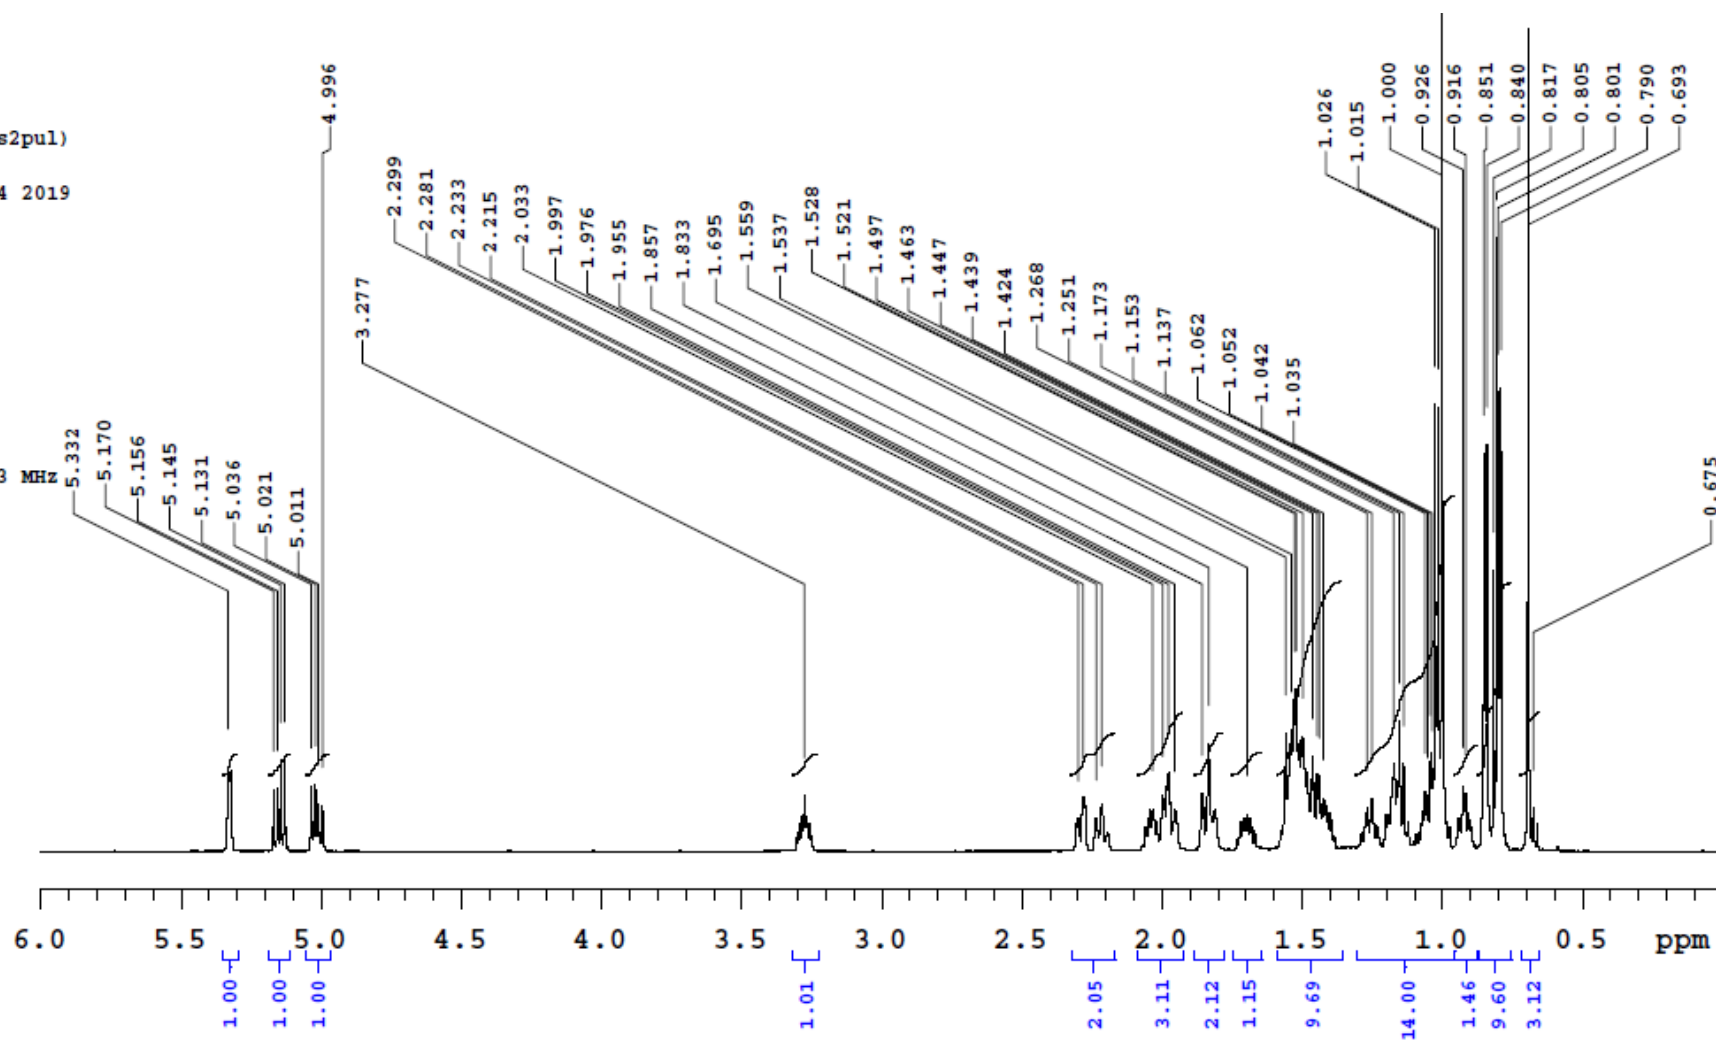

Figure S10. <sup>1</sup>H spectrum of 3β,3'β-distigmasteryl ether (3) in CDCl<sub>3</sub>

Pulse Sequence: CARBON (s2pul)  
 Solvent: cdcl3  
 Data collected on: Nov 14 2019

Temp. 25.0 C / 298.1 K  
 Operator: vnmr1

Relax. delay 0.500 sec  
 Pulse 30.0 degrees  
 Acq. time 1.200 sec  
 Width 37878.8 Hz  
 368 repetitions

OBSERVE C13, 150.8286494 MHz  
 DECOUPLE H1, 599.8380734 MHz

Power 34 dB  
 continuously on  
 WALTZ-16 modulated

DATA PROCESSING

Line broadening 1.0 Hz  
 FT size 524288  
 Total time 4 hr, 43 min

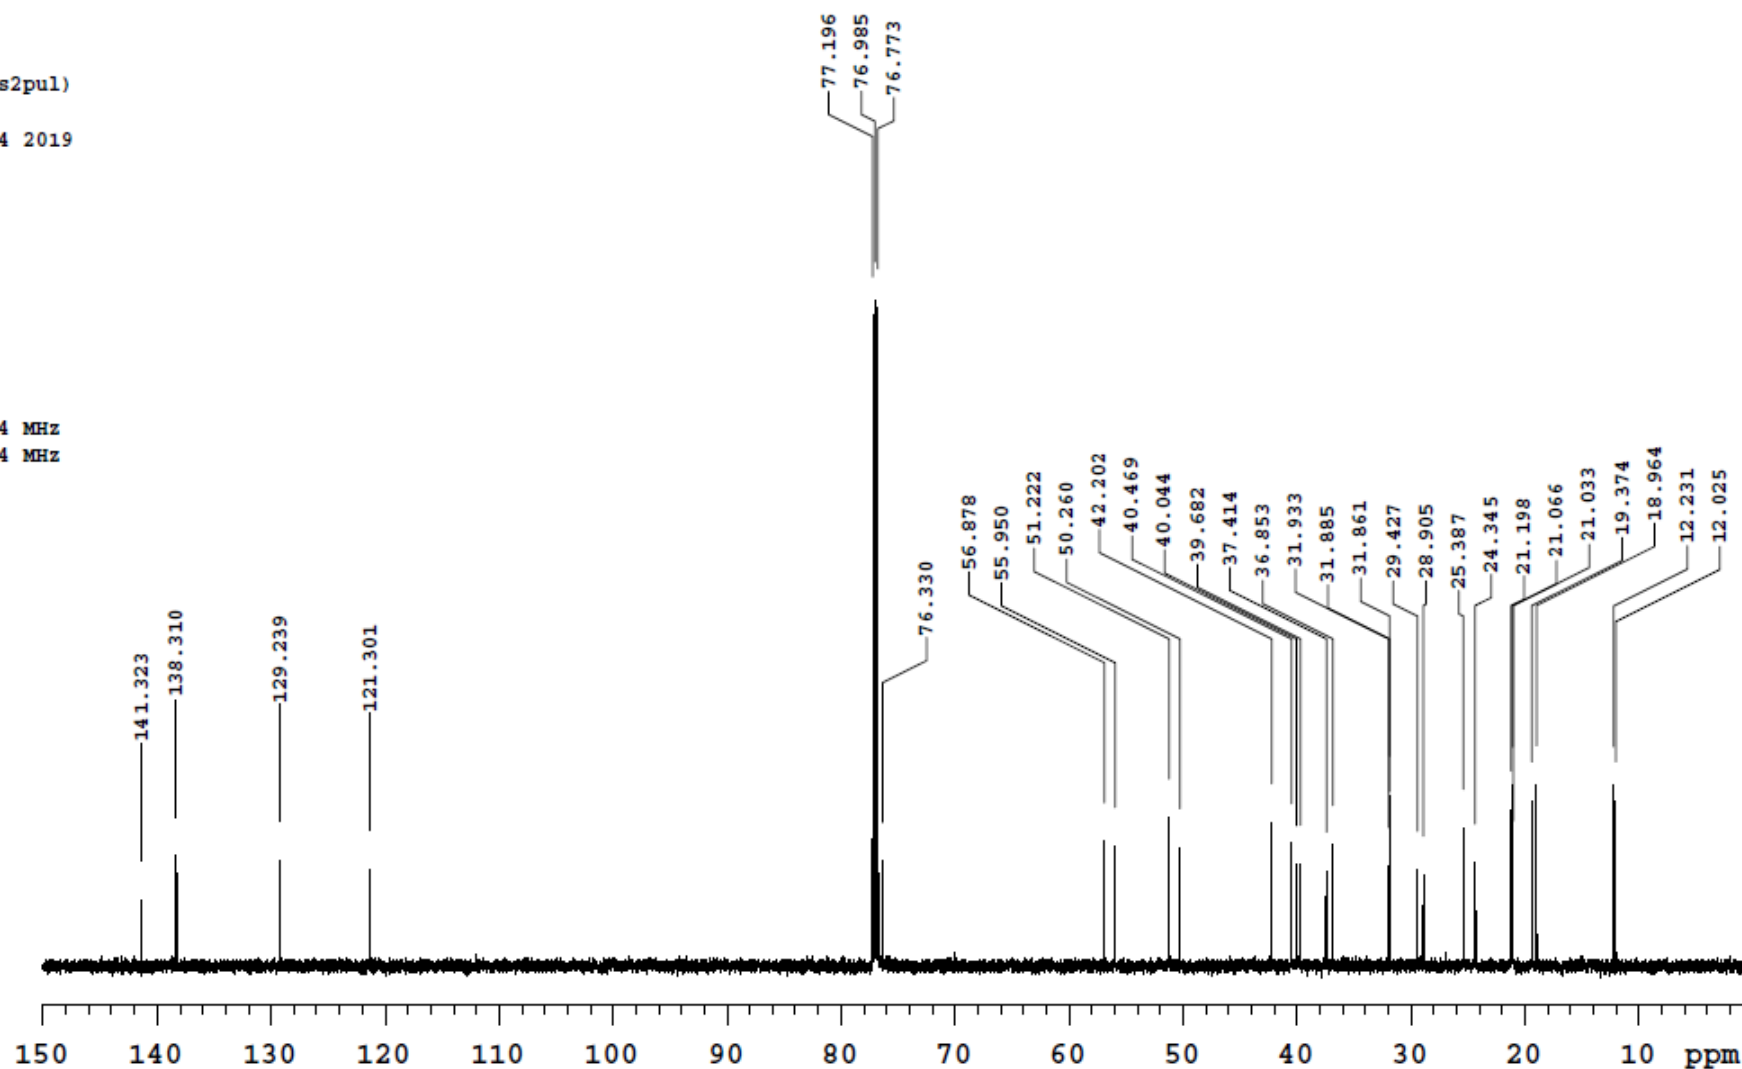

Figure S11. <sup>13</sup>C spectrum of 3β,3'β-distigmasteryl ether (**3**) in CDCl<sub>3</sub>

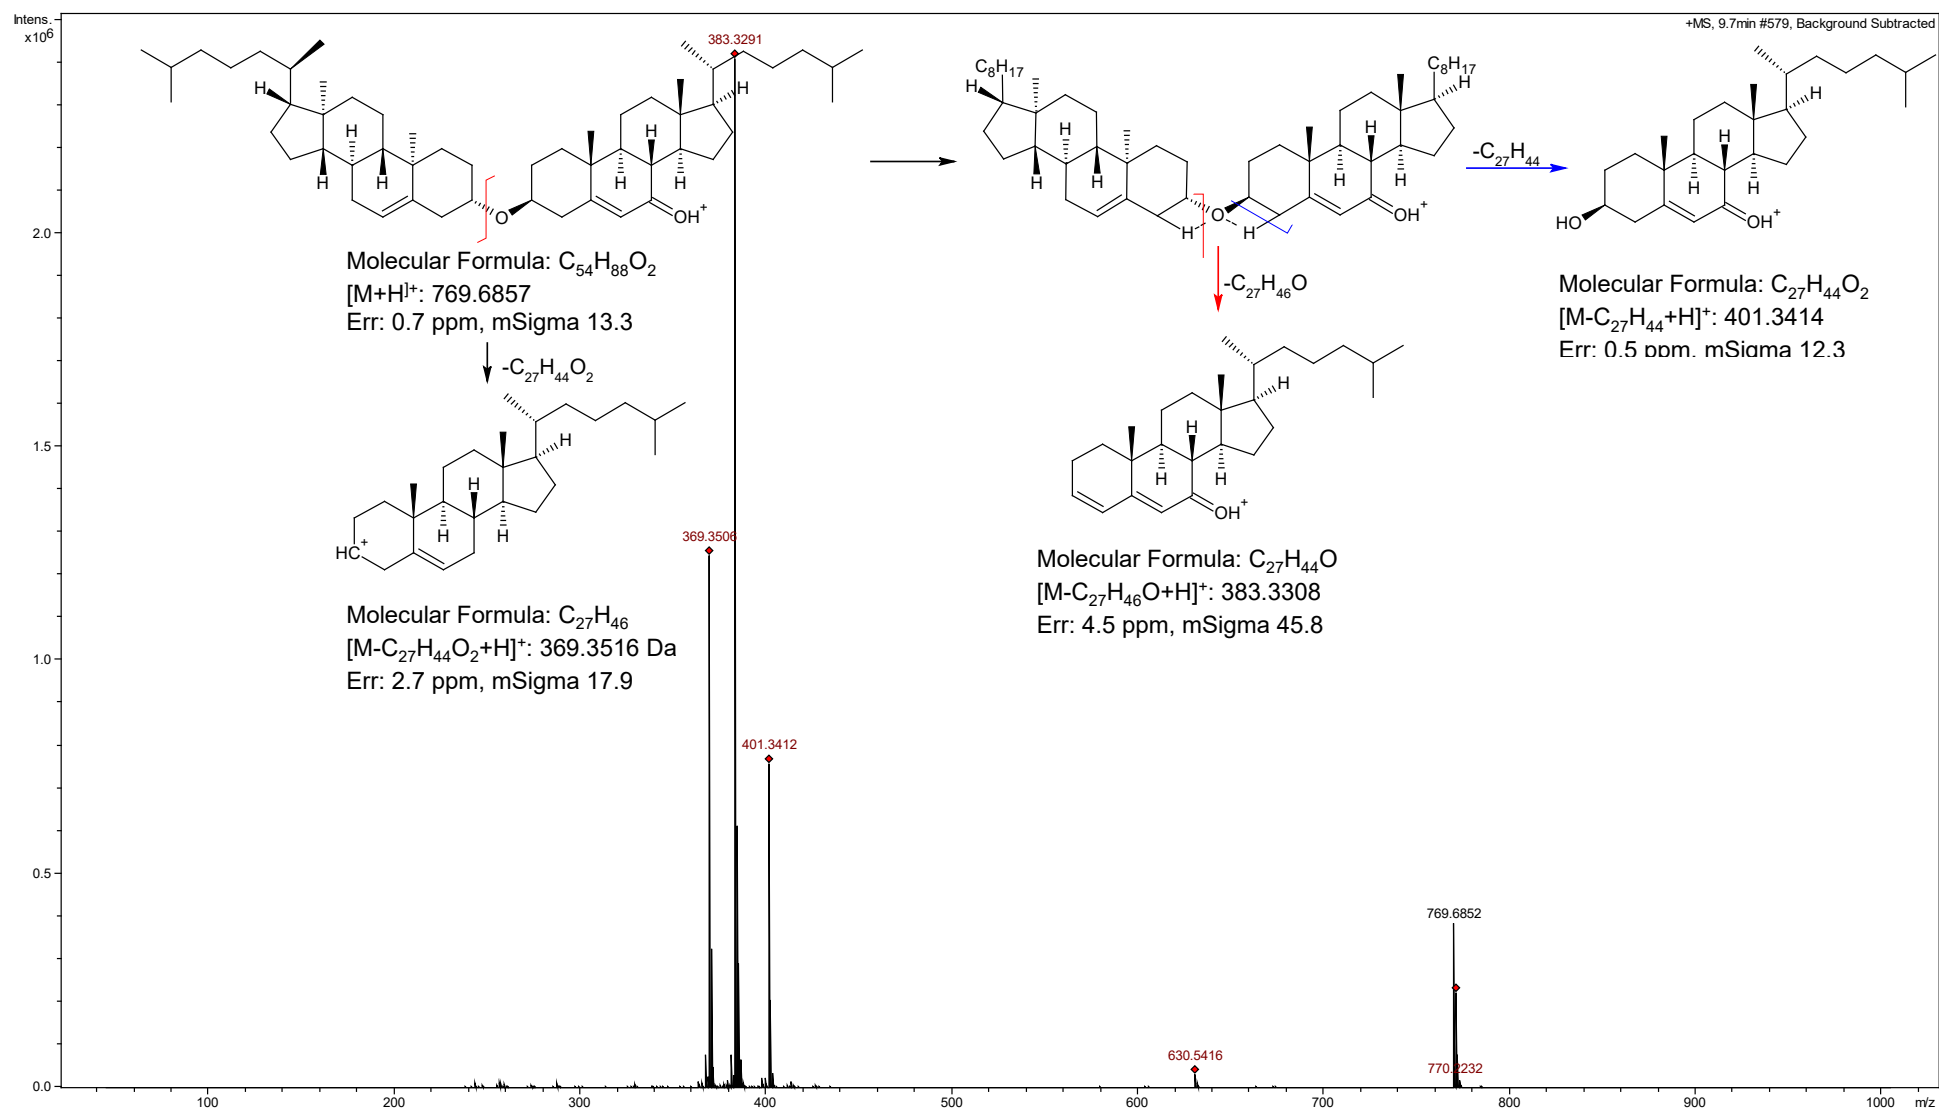

Figure S12. Mass spectrum of cholest-5-en-7-one-3 $\beta$ -yl-cholesterol ether (7-ketocholesteryl-cholesterol ether) (4)

Pulse Sequence: PROTON (s2pul)  
 Solvent: cdcl3  
 Data collected on: Jan 3 2019

Temp. 25.0 C / 298.1 K  
 Operator: vnmr1

Relax. delay 1.000 sec  
 Pulse 29.2 degrees  
 Acq. time 5.000 sec  
 Width 5000.0 Hz  
 Single scan

OBSERVE H1, 599.8350651 MHz  
 DATA PROCESSING  
 FT size 131072  
 Total time 0 min 6 sec

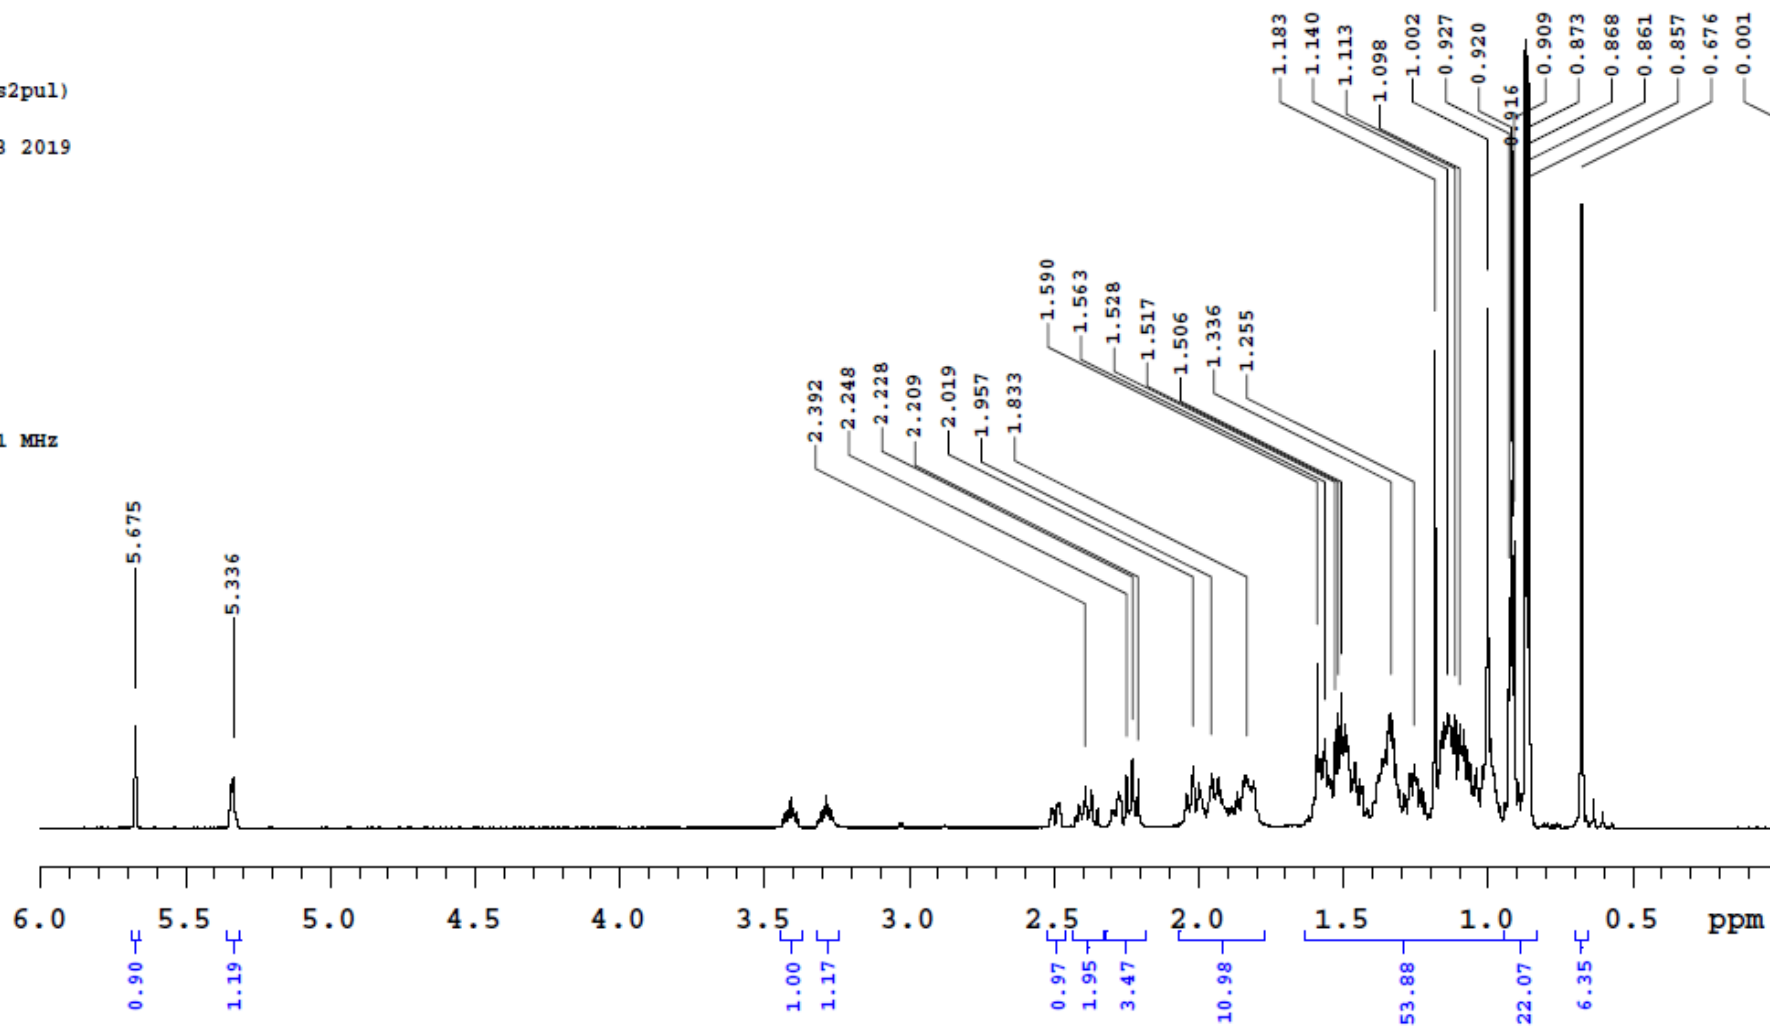

Figure S13. <sup>1</sup>H spectrum of cholest-5-en-7-one-3β-yl-cholesterol ether (7-ketocholesteryl-cholesterol ether) (4) in CDCl<sub>3</sub>

Pulse Sequence: CARBON (s2pul)  
 Solvent: cdcl3  
 Data collected on: Jan 4 2019

Temp. 25.0 C / 298.1 K  
 Operator: vnmr1

Relax. delay 0.500 sec  
 Pulse 30.0 degrees  
 Acq. time 1.500 sec  
 Width 37878.8 Hz  
 9568 repetitions

OBSERVE C13, 150.8286494 MHz  
 DECOUPLE H1, 599.8380734 MHz  
 Power 34 dB  
 continuously on

WALTZ-16 modulated

DATA PROCESSING

Line broadening 1.0 Hz

FT size 262144

Total time 11 hr, 6 min

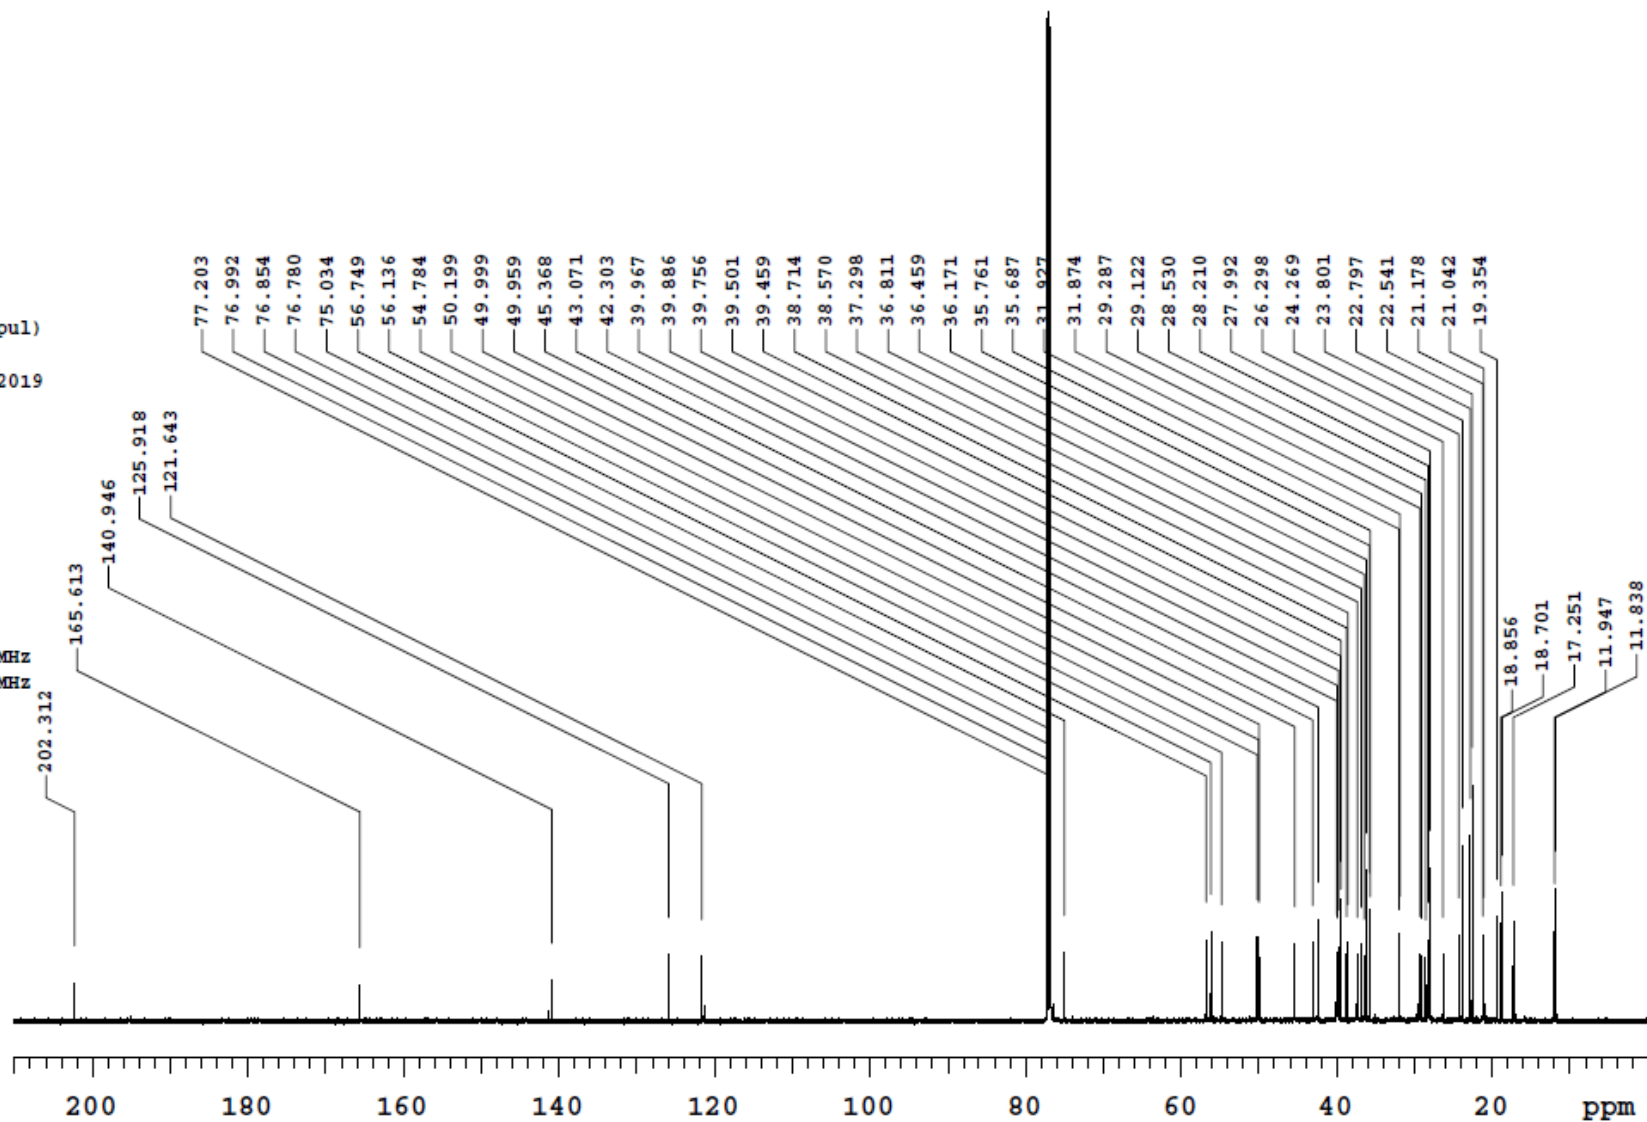

Figure S14.  $^{13}\text{C}$  spectrum of cholest-5-en-7-one-3 $\beta$ -yl-cholesterol ether (7-ketocholesteryl-cholesterol ether) (4) in  $\text{CDCl}_3$

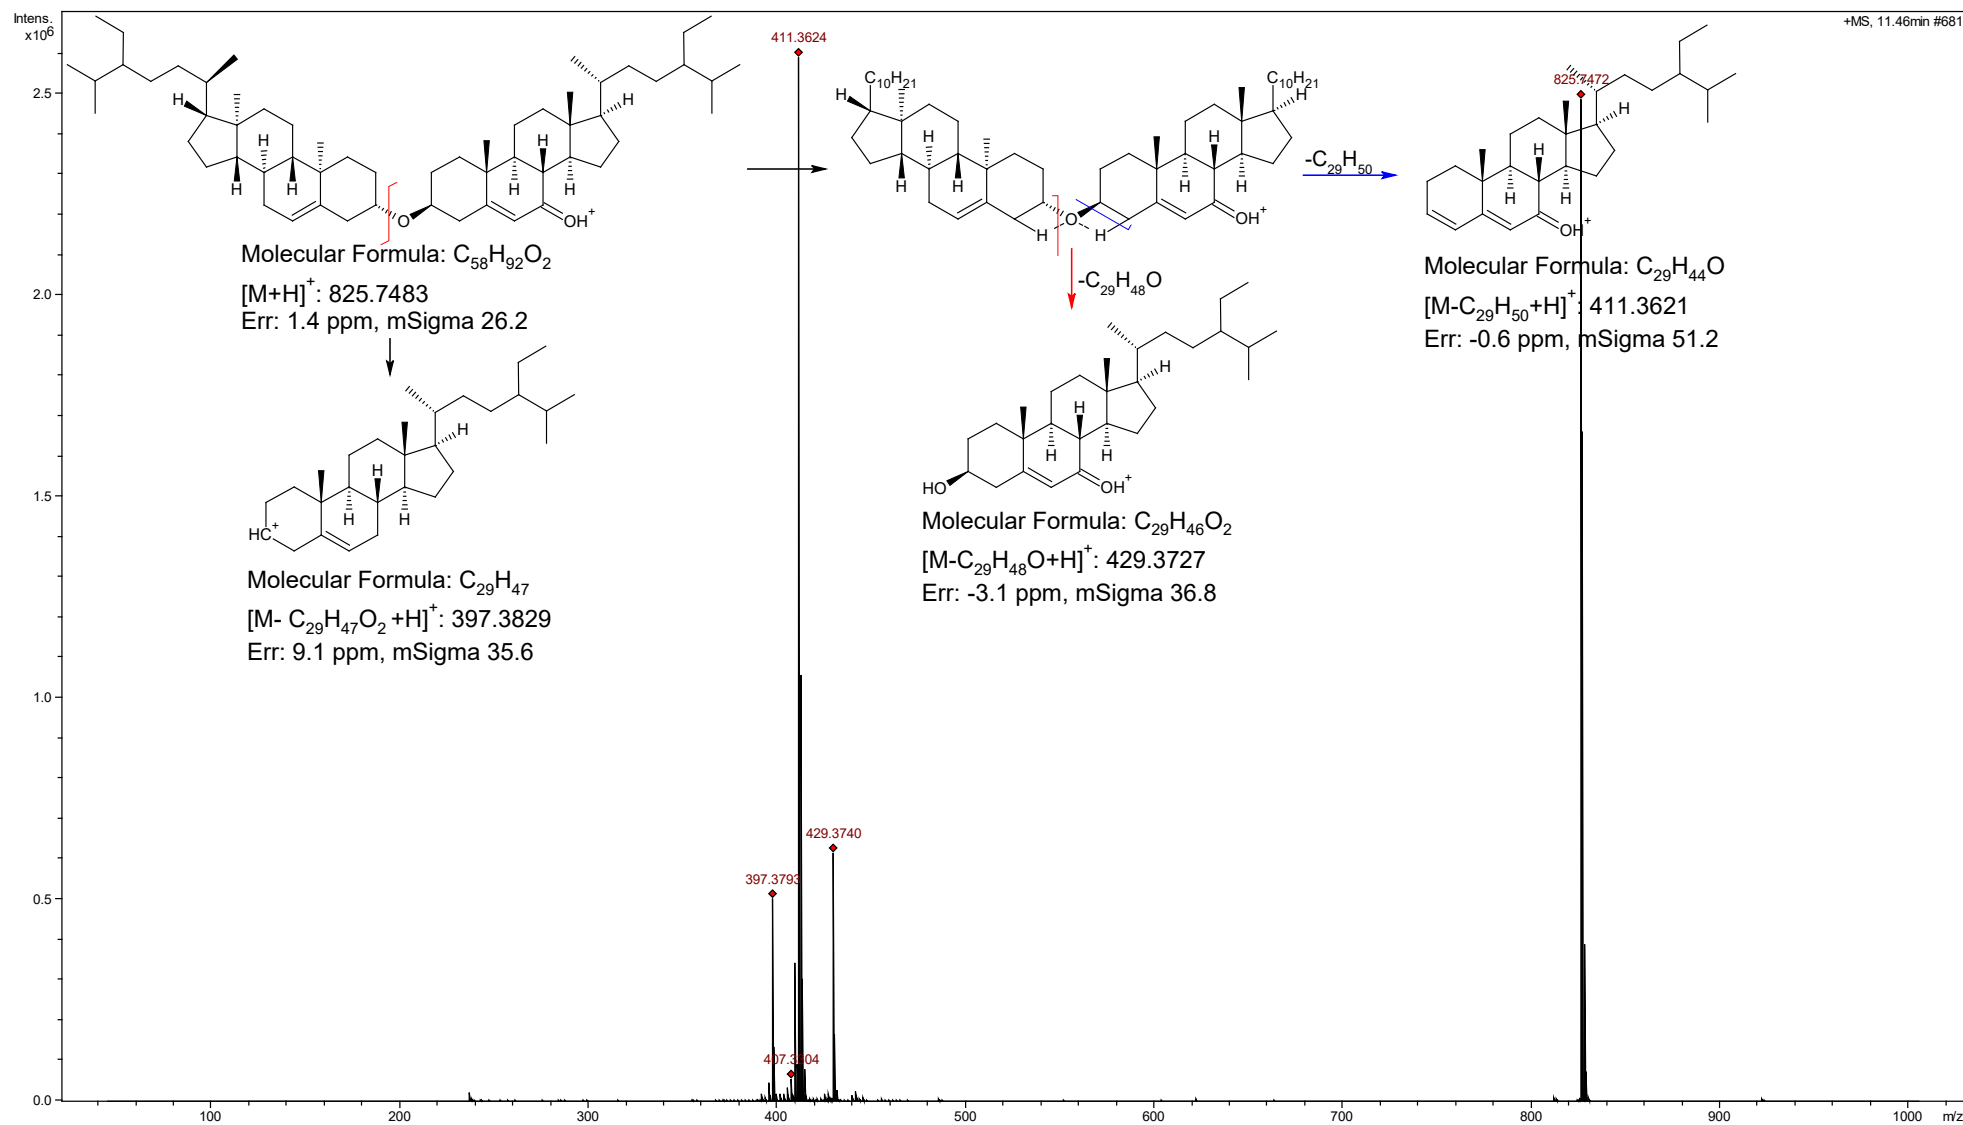

Figure S15. Mass spectrum of sitost-5-en-7-one-3 $\beta$ -yl-sitosterol ether (7-ketositosteryl-sitosterol ether) (5)

Pulse Sequence: PROTON (s2pul)  
 Solvent: cdcl3  
 Data collected on: Jan 16 2020

Temp. 25.0 C / 298.1 K  
 Operator: vnmr1

Relax. delay 1.000 sec  
 Pulse 32.1 degrees  
 Acq. time 4.200 sec  
 Width 6009.6 Hz  
 32 repetitions

OBSERVE H1, 599.8350651 MHz  
 DATA PROCESSING  
 Line broadening 0.1 Hz  
 FT size 131072  
 Total time 2 min 46 sec

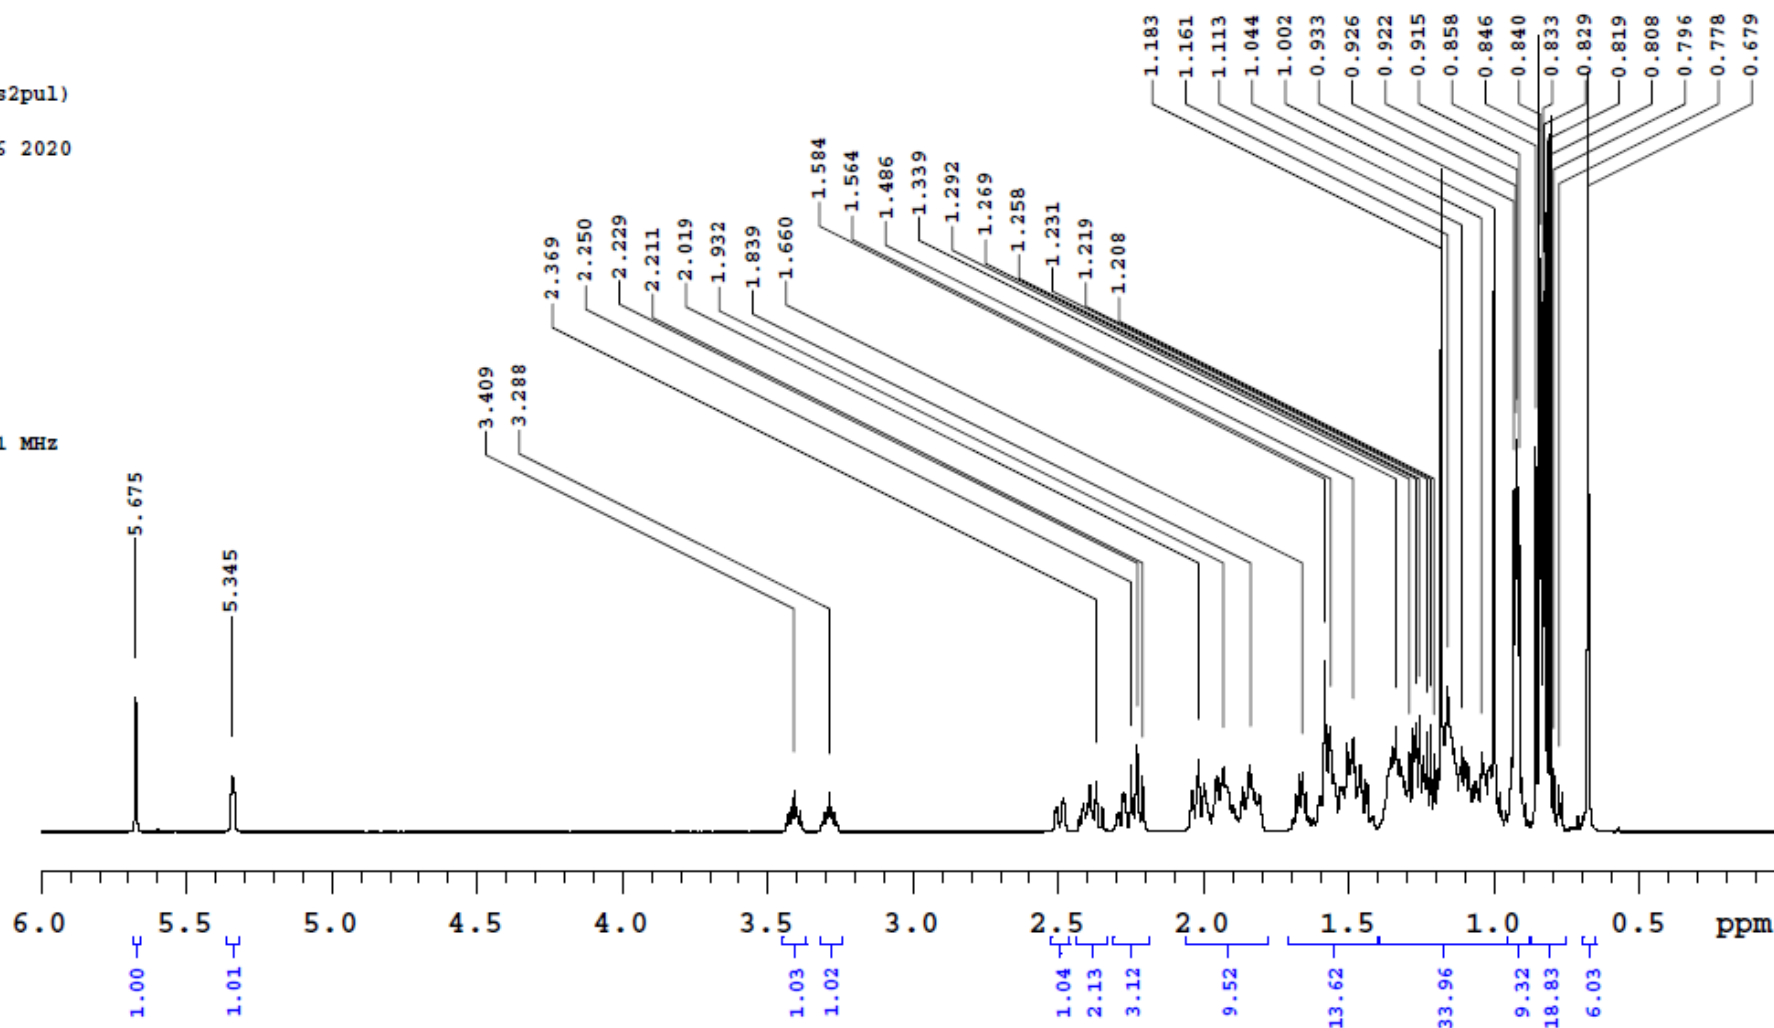

Figure S16. <sup>1</sup>H spectrum of sitost-5-en-7-one-3β-yl-sitosterol ether (7-ketositosteryl-sitosterol ether) (5) in CDCl<sub>3</sub>

Pulse Sequence: CARBON (s2pul)  
 Solvent: cdcl3  
 Data collected on: Jan 16 2020

Temp. 25.0 C / 298.1 K  
 Operator: vnmr1

Relax. delay 0.500 sec  
 Pulse 30.0 degrees  
 Acq. time 1.500 sec  
 Width 29069.8 Hz  
 1920 repetitions  
 OBSERVE C13, 125.6810405 MHz  
 DECOUPLE H1, 499.8272777 MHz  
 Power 36 dB  
 continuously on  
 WALTZ-16 modulated  
 DATA PROCESSING  
 Line broadening 1.0 Hz  
 FT size 262144  
 Total time 5 hr, 33 min

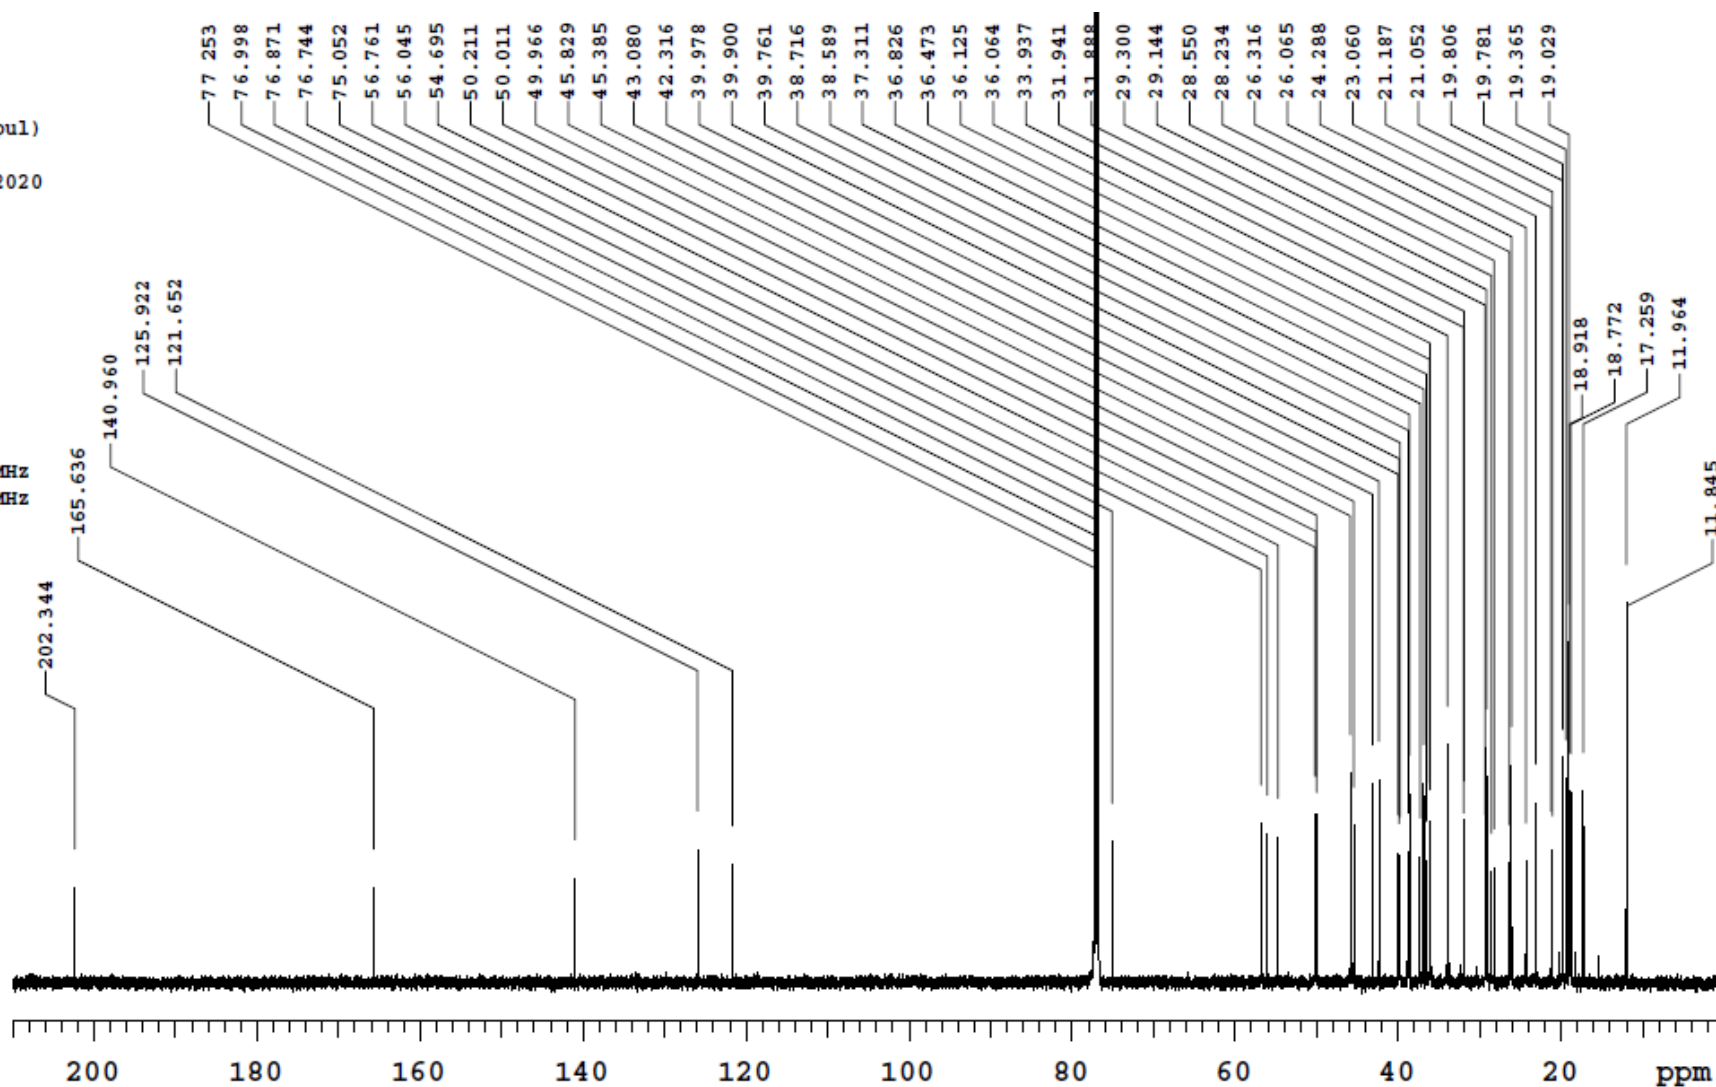

Figure S17.  $^{13}\text{C}$  spectrum of sitost-5-en-7-one-3 $\beta$ -yl-sitosterol ether (7-ketositosteryl-sitosterol ether) (5) in  $\text{CDCl}_3$

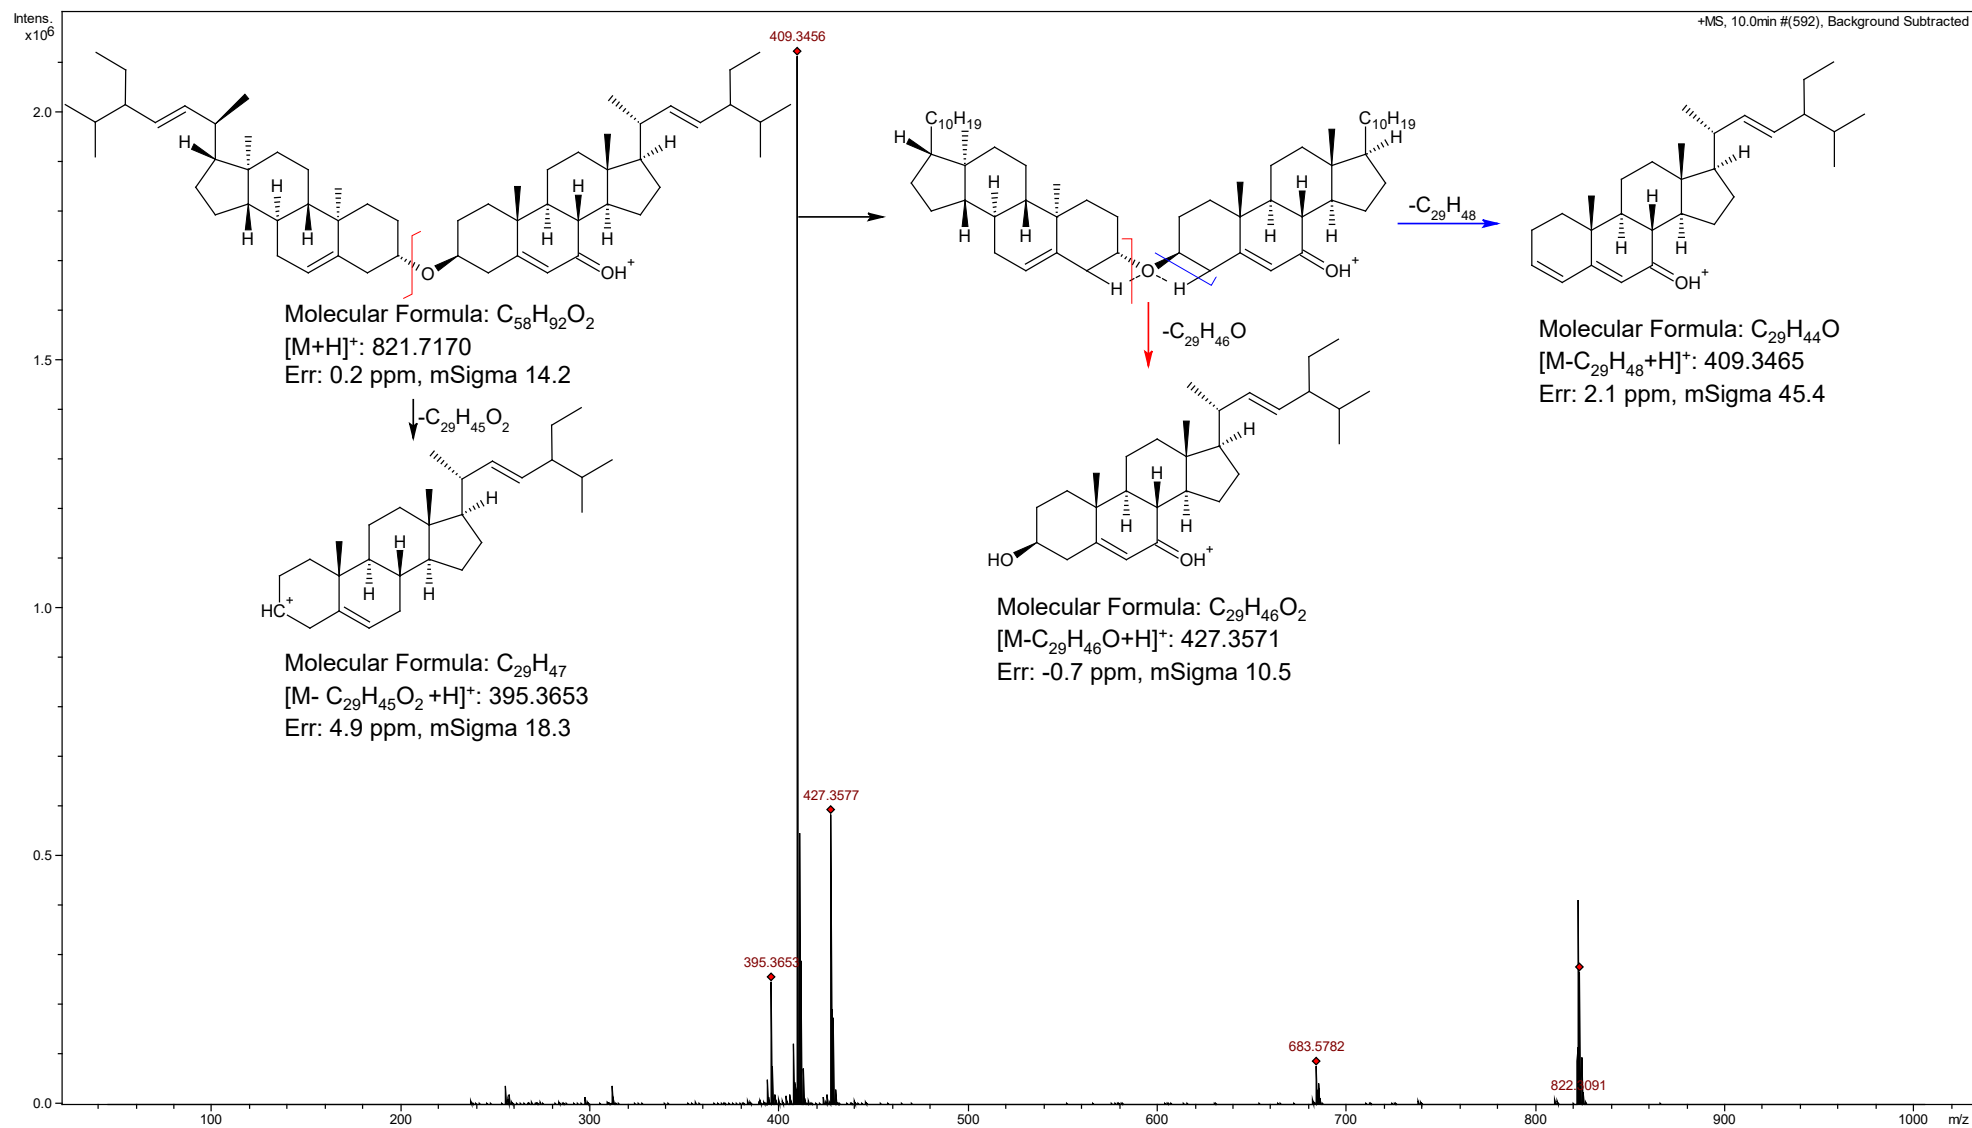

Figure S18. Mass spectrum of stigmast-5-en-7-one-3 $\beta$ -yl-stigmasterol ether (7-ketostigmasteryl-stigmasterol ether) (6)

Pulse Sequence: PROTON (s2pul)  
 Solvent: cdcl3  
 Data collected on: Sep 11 2019

Temp. 25.3 C / 298.4 K  
 Operator: vnmr1

Relax. delay 1.000 sec  
 Pulse 31.2 degrees  
 Acq. time 4.000 sec  
 Width 8012.8 Hz  
 64 repetitions  
 OBSERVE H1, 499.8026283 MHz  
 DATA PROCESSING  
 Line broadening 0.1 Hz  
 FT size 524288  
 Total time 5 min 20 sec

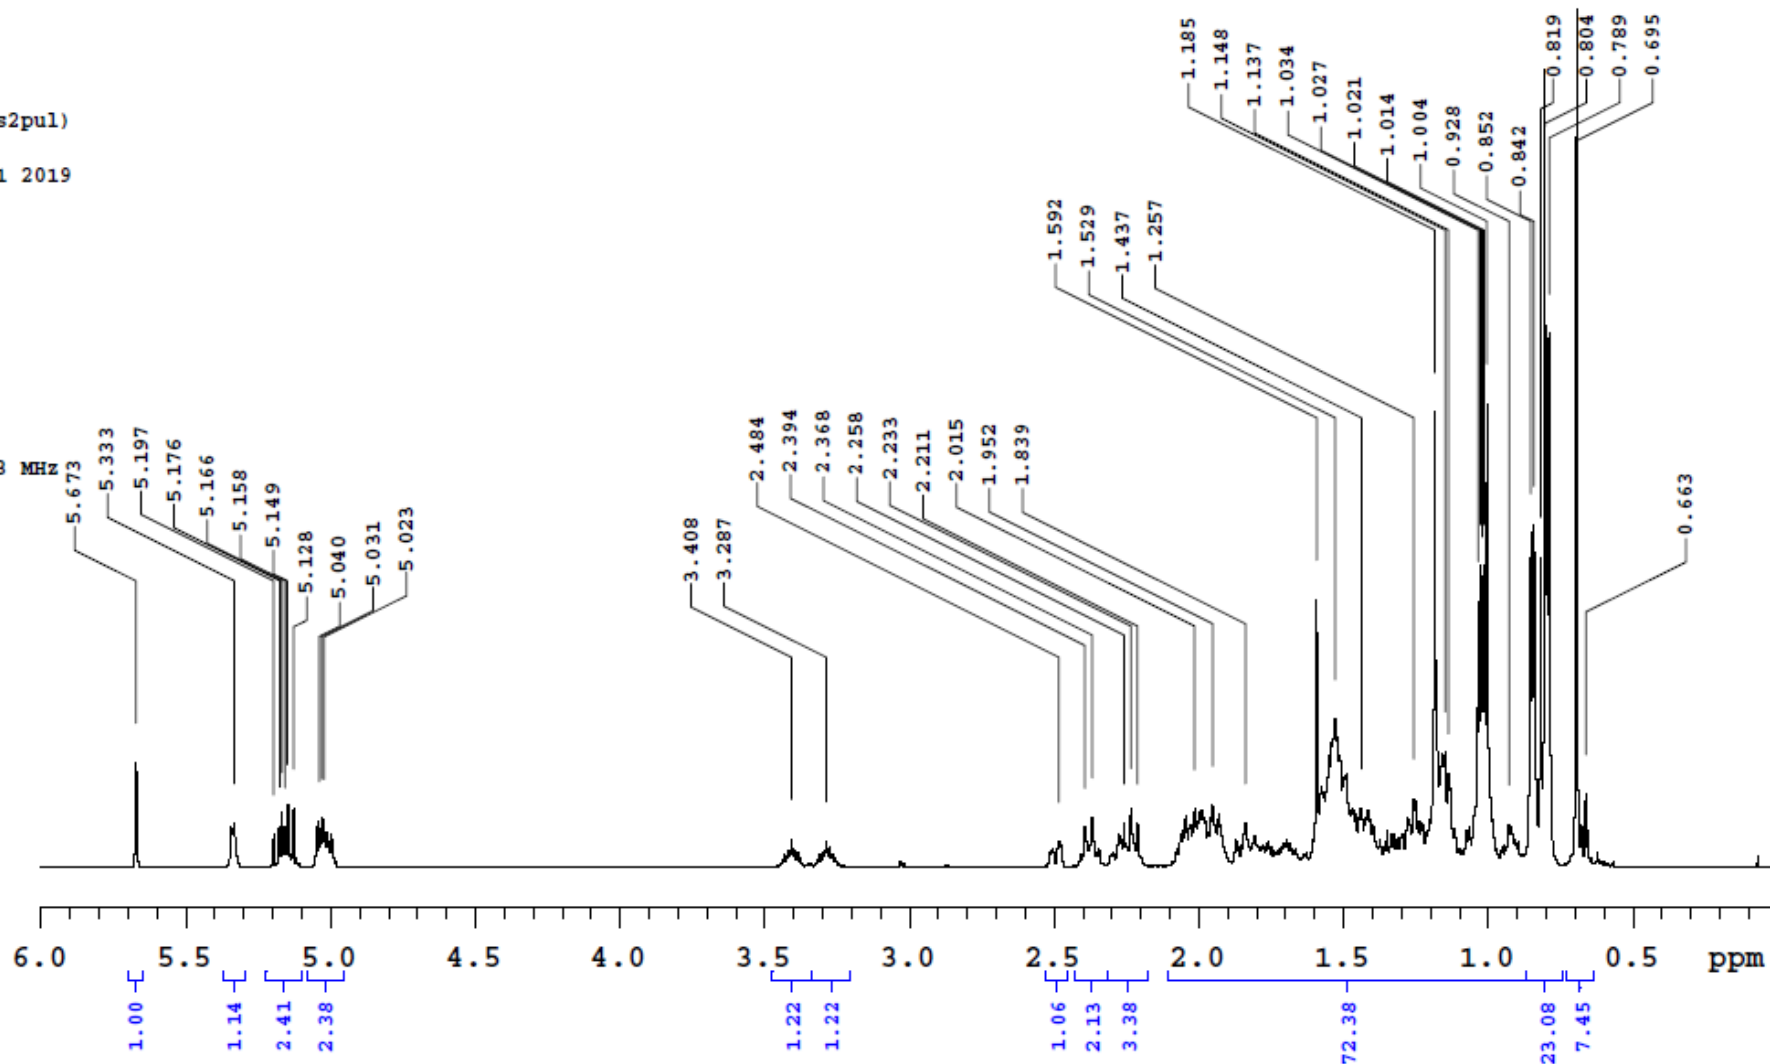

Figure S19. <sup>1</sup>H spectrum of stigmast-5-en-7-one-3β-yl-stigmasterol ether (7-ketostigmasteryl-stigmasterol ether) (6) in CDCl<sub>3</sub>

Pulse Sequence: CARBON (s2pul)  
 Solvent: cdcl3  
 Data collected on: Sep 11 2019

Temp. 25.3 C / 298.4 K  
 Operator: vnmr1

Relax. delay 0.500 sec  
 Pulse 26.5 degrees  
 Acq. time 1.022 sec  
 Width 32051.3 Hz  
 12752 repetitions  
 OBSERVE C13, 125.6754712 MHz  
 DECOUPLE H1, 499.8051288 MHz  
 Power 36 dB  
 continuously on  
 WALTZ-16 modulated  
 DATA PROCESSING  
 Line broadening 1.0 Hz  
 FT size 262144  
 Total time 21 hr, 9 min

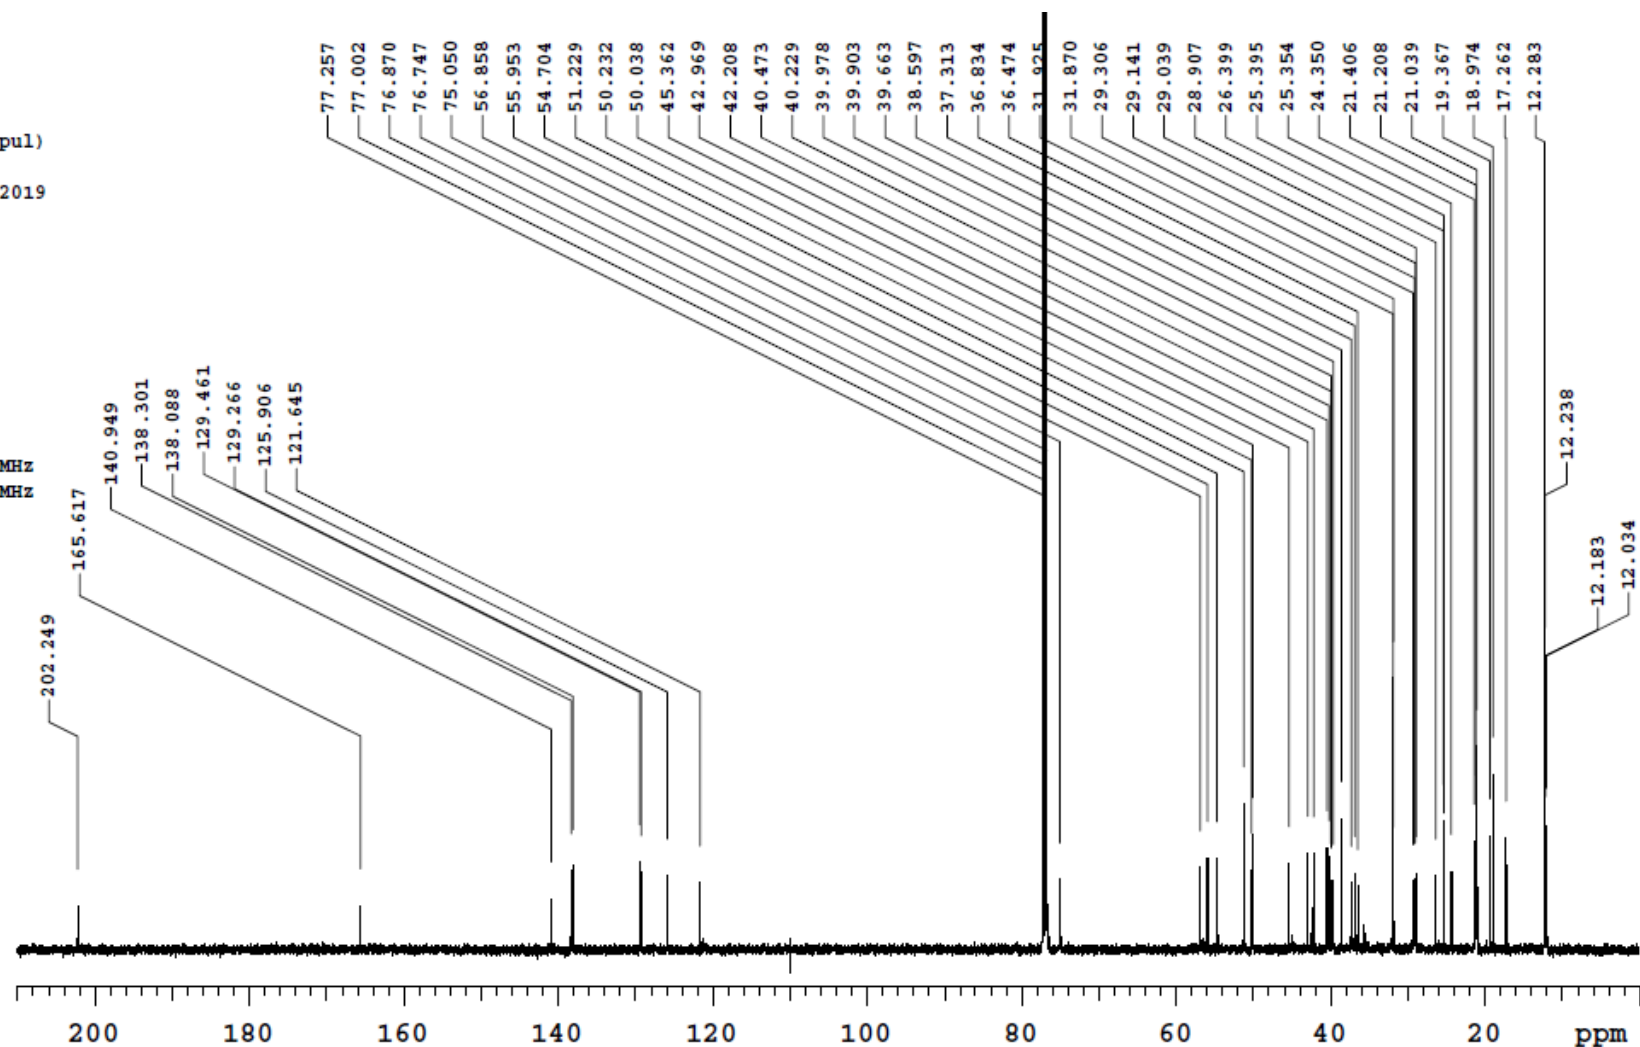

Figure S20. <sup>13</sup>C spectrum of stigmast-5-en-7-one-3β-yl-stigmasterol ether (7-ketostigmasteryl-stigmasterol ether) (6) in CDCl<sub>3</sub>

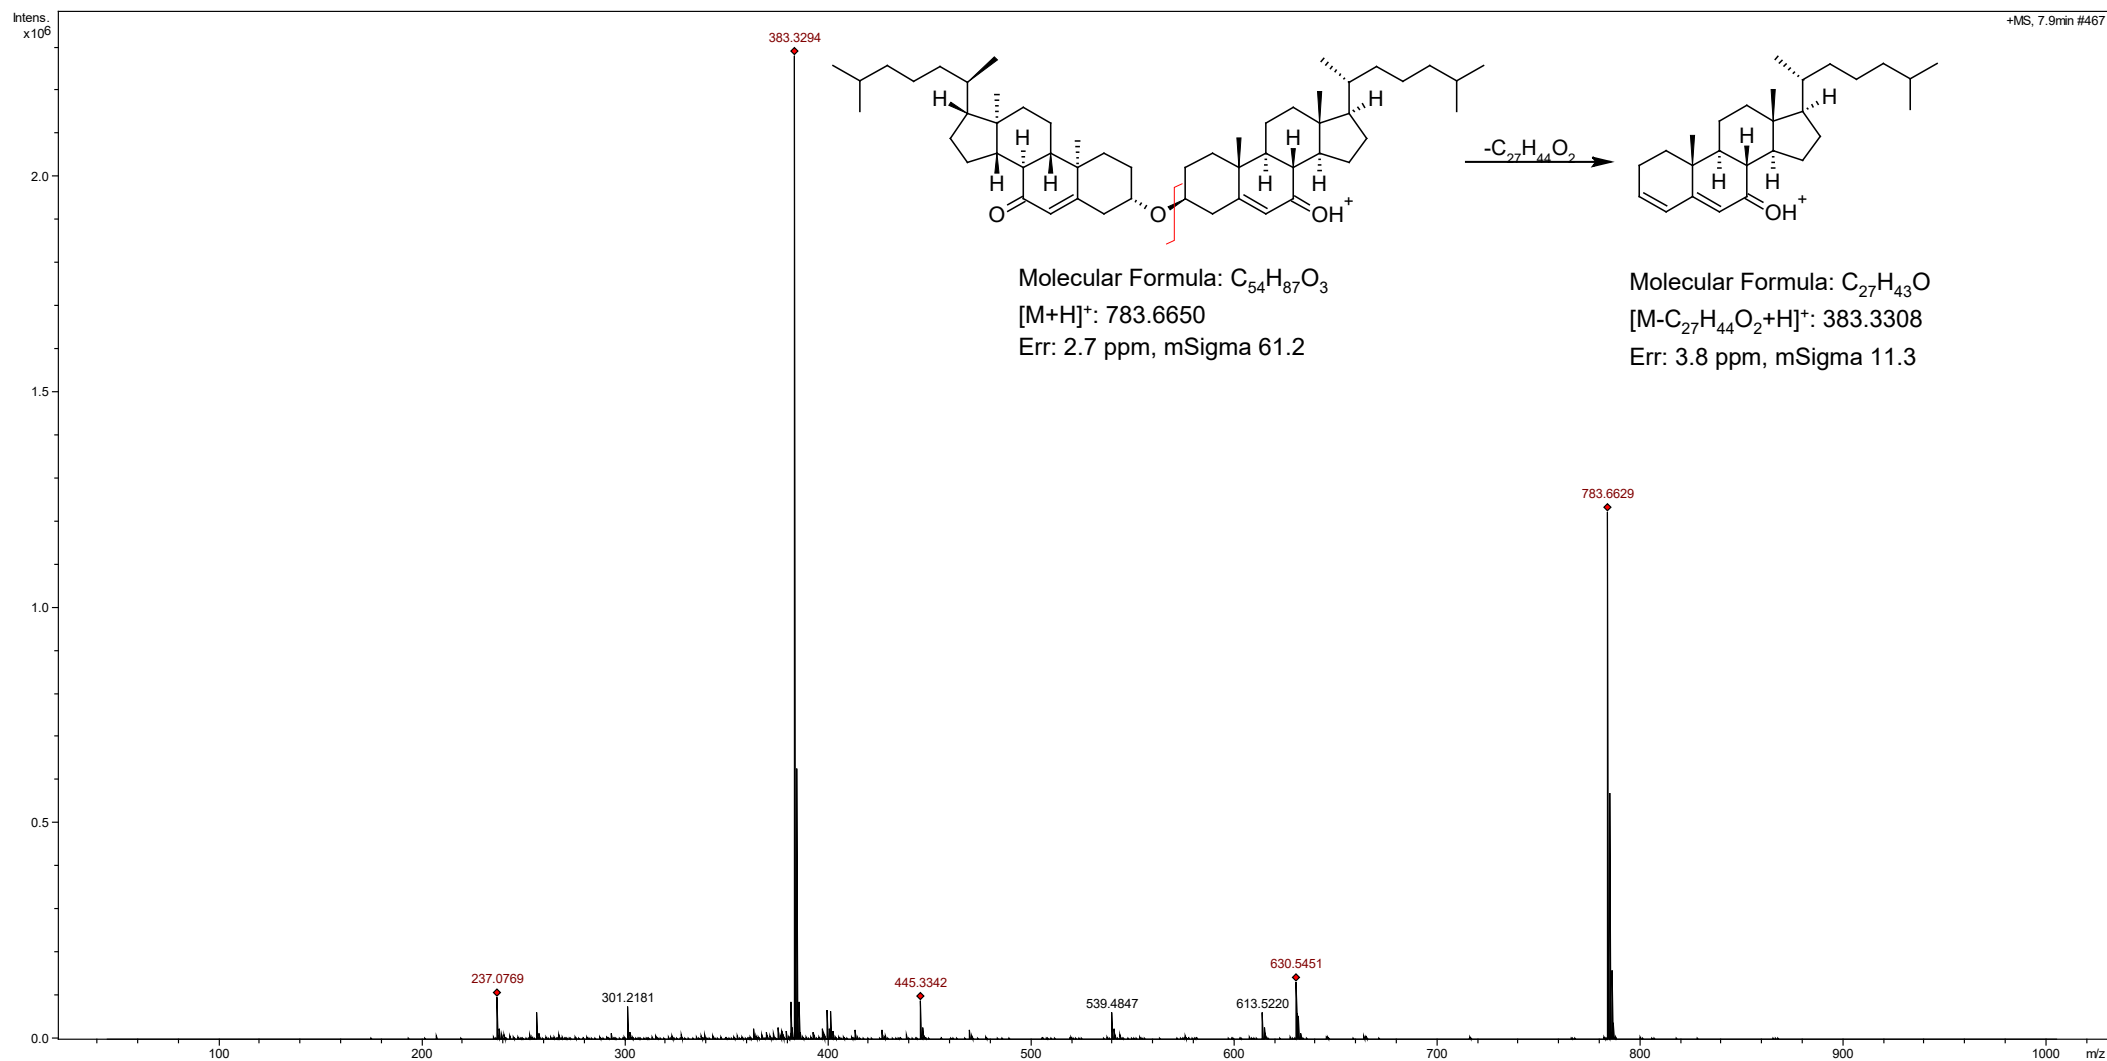

Figure S21. Mass spectrum of 3β,3'β-di(cholest-5-en-7-one-3β-yl) ether (7)

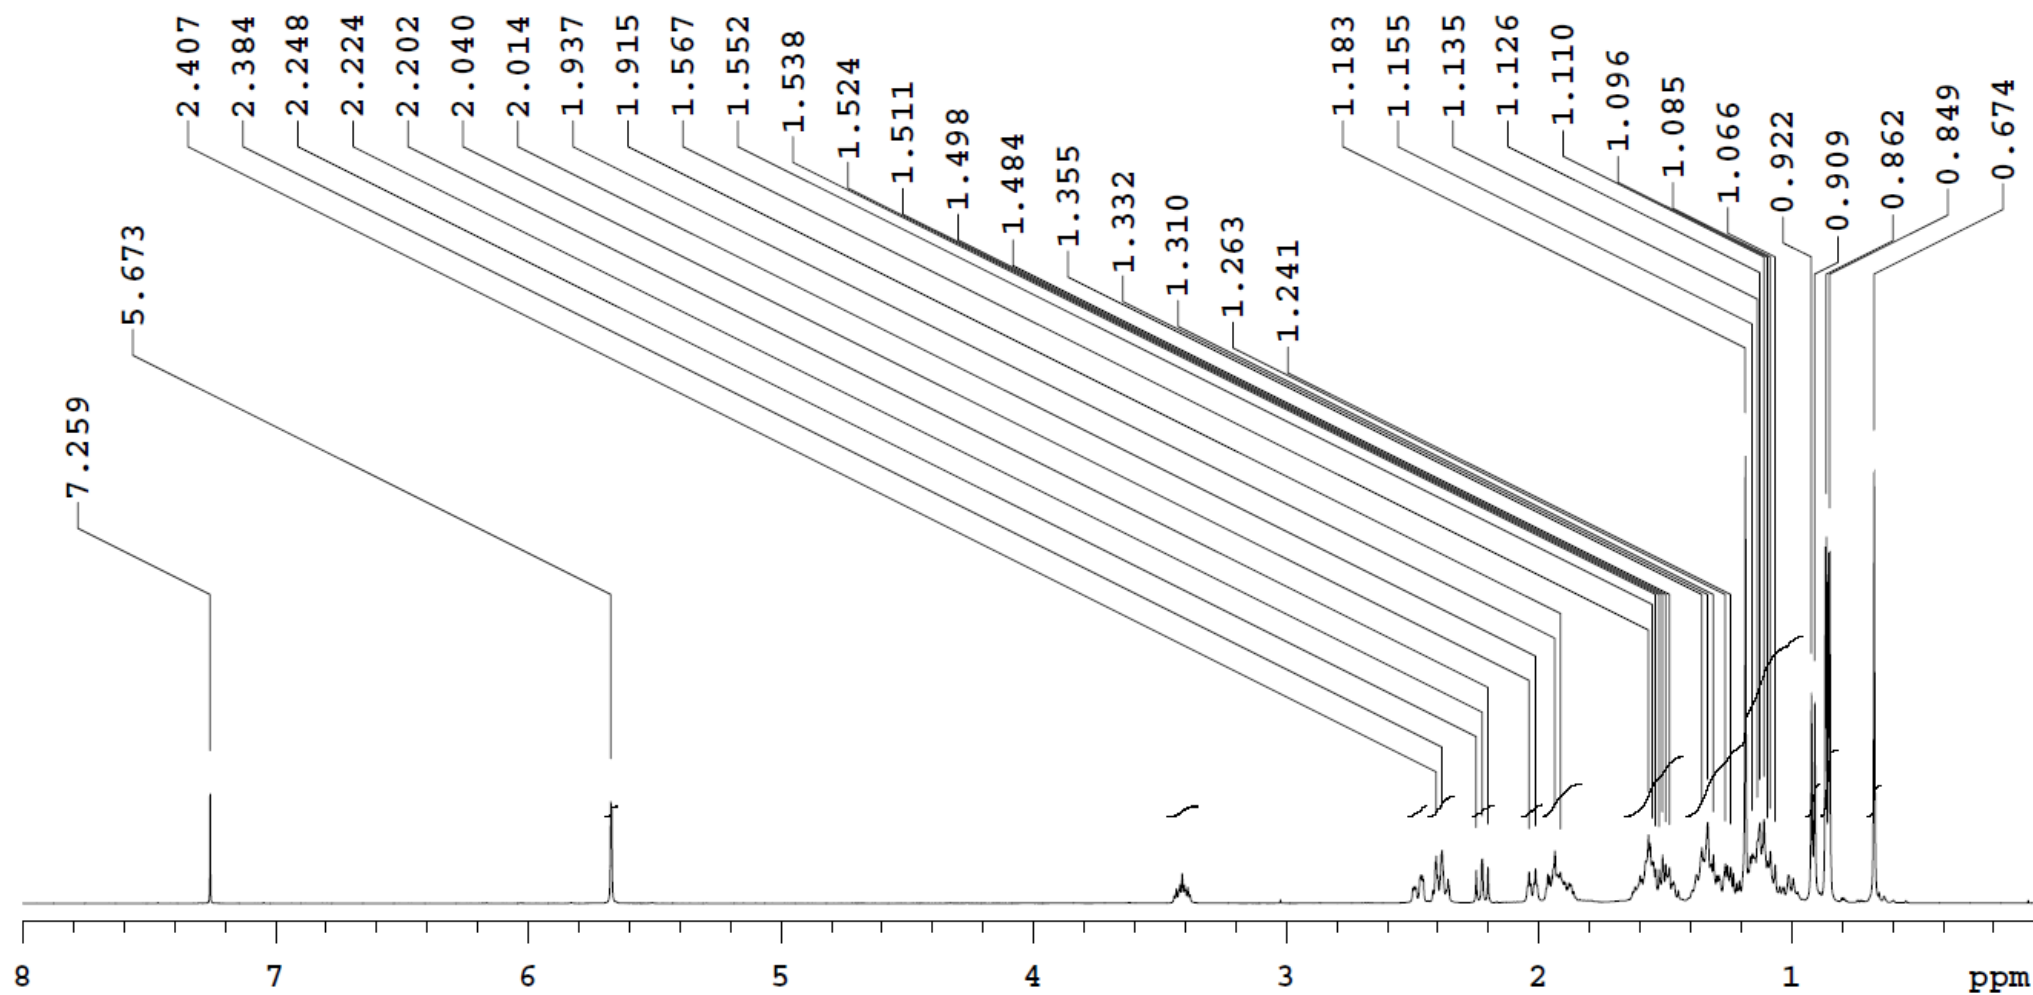

Figure S22. <sup>1</sup>H spectrum of 3β,3'β-di(cholest-5-en-7-one-3β-yl) ether (7) in CDCl<sub>3</sub>

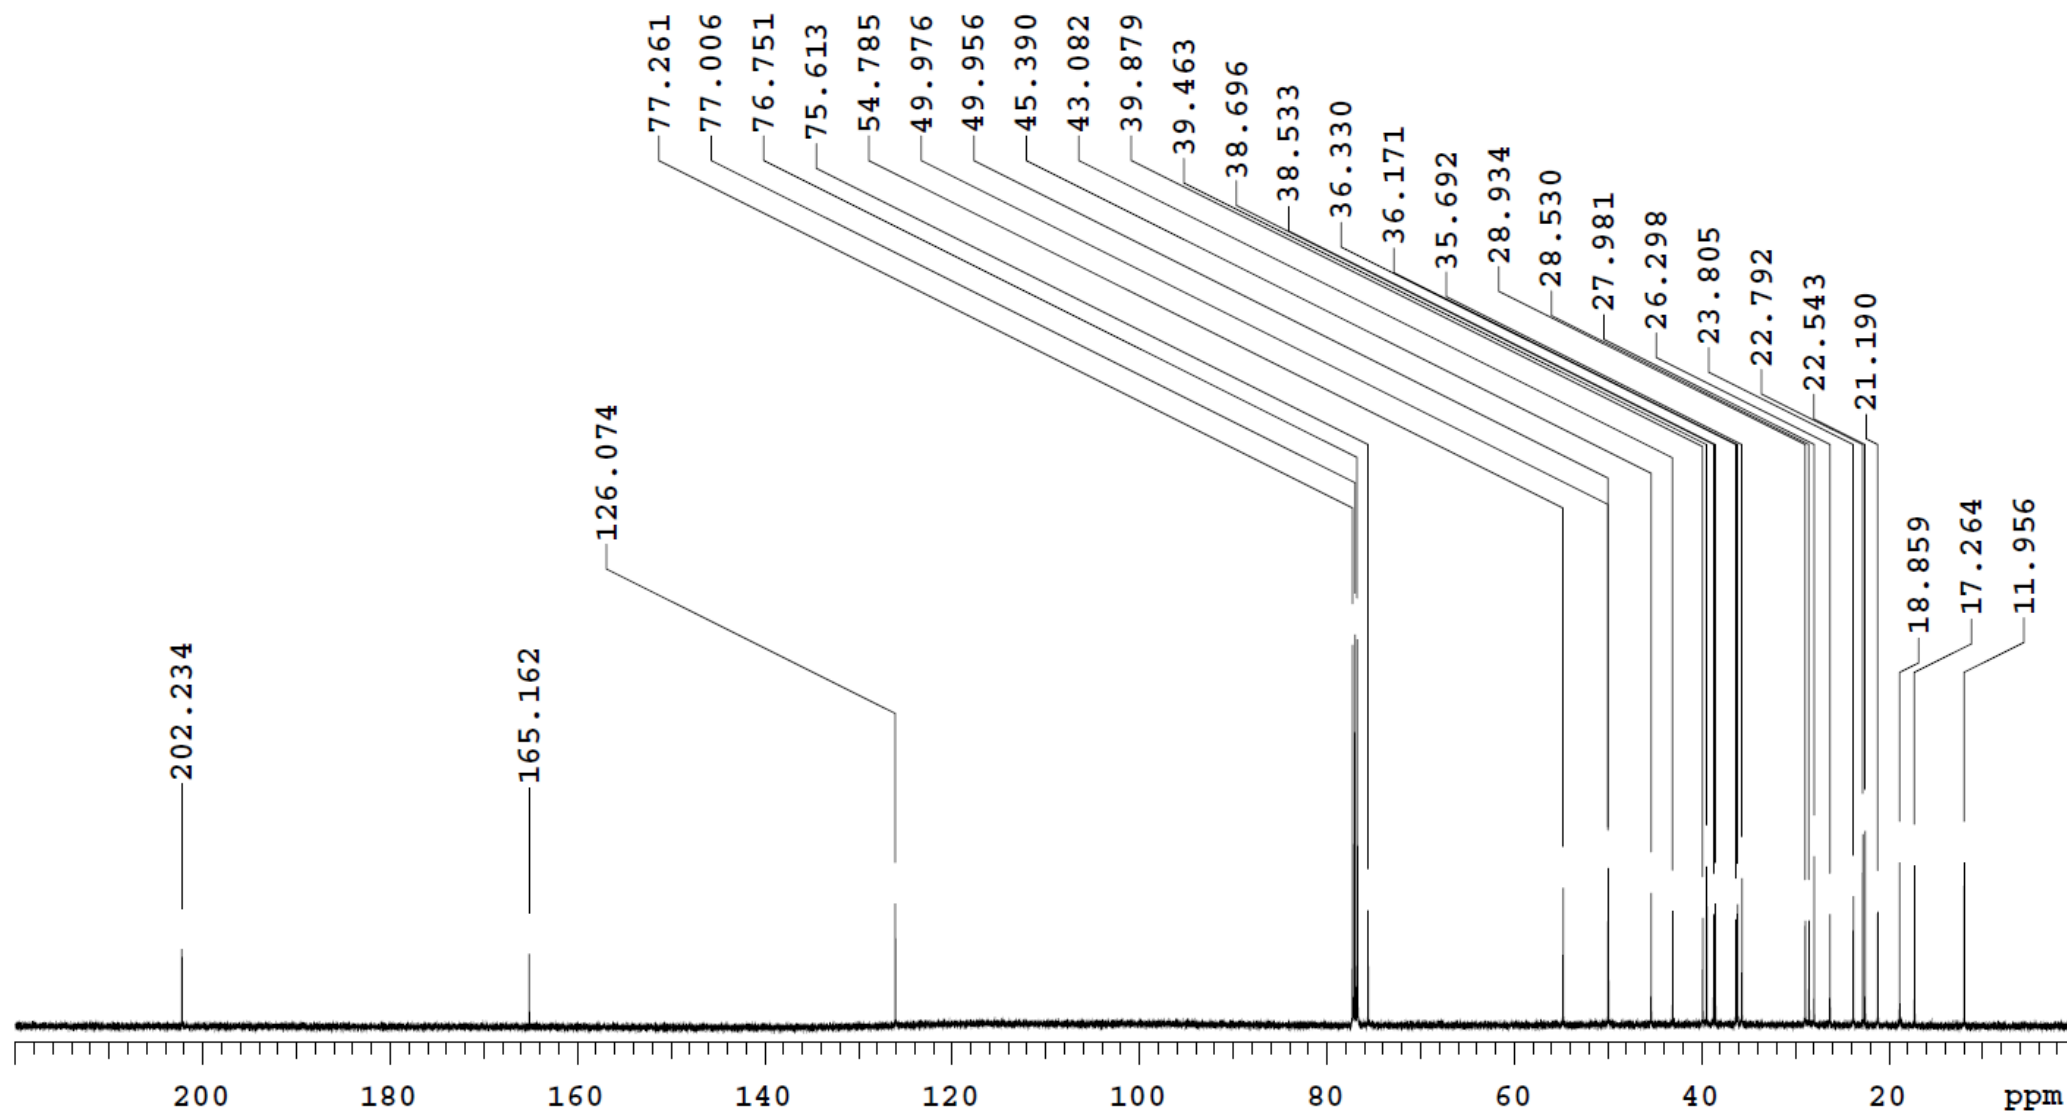

Figure S23. <sup>13</sup>C spectrum of 3β,3'β-di(cholest-5-en-7-one-3β-yl) ether (7) in CDCl<sub>3</sub>

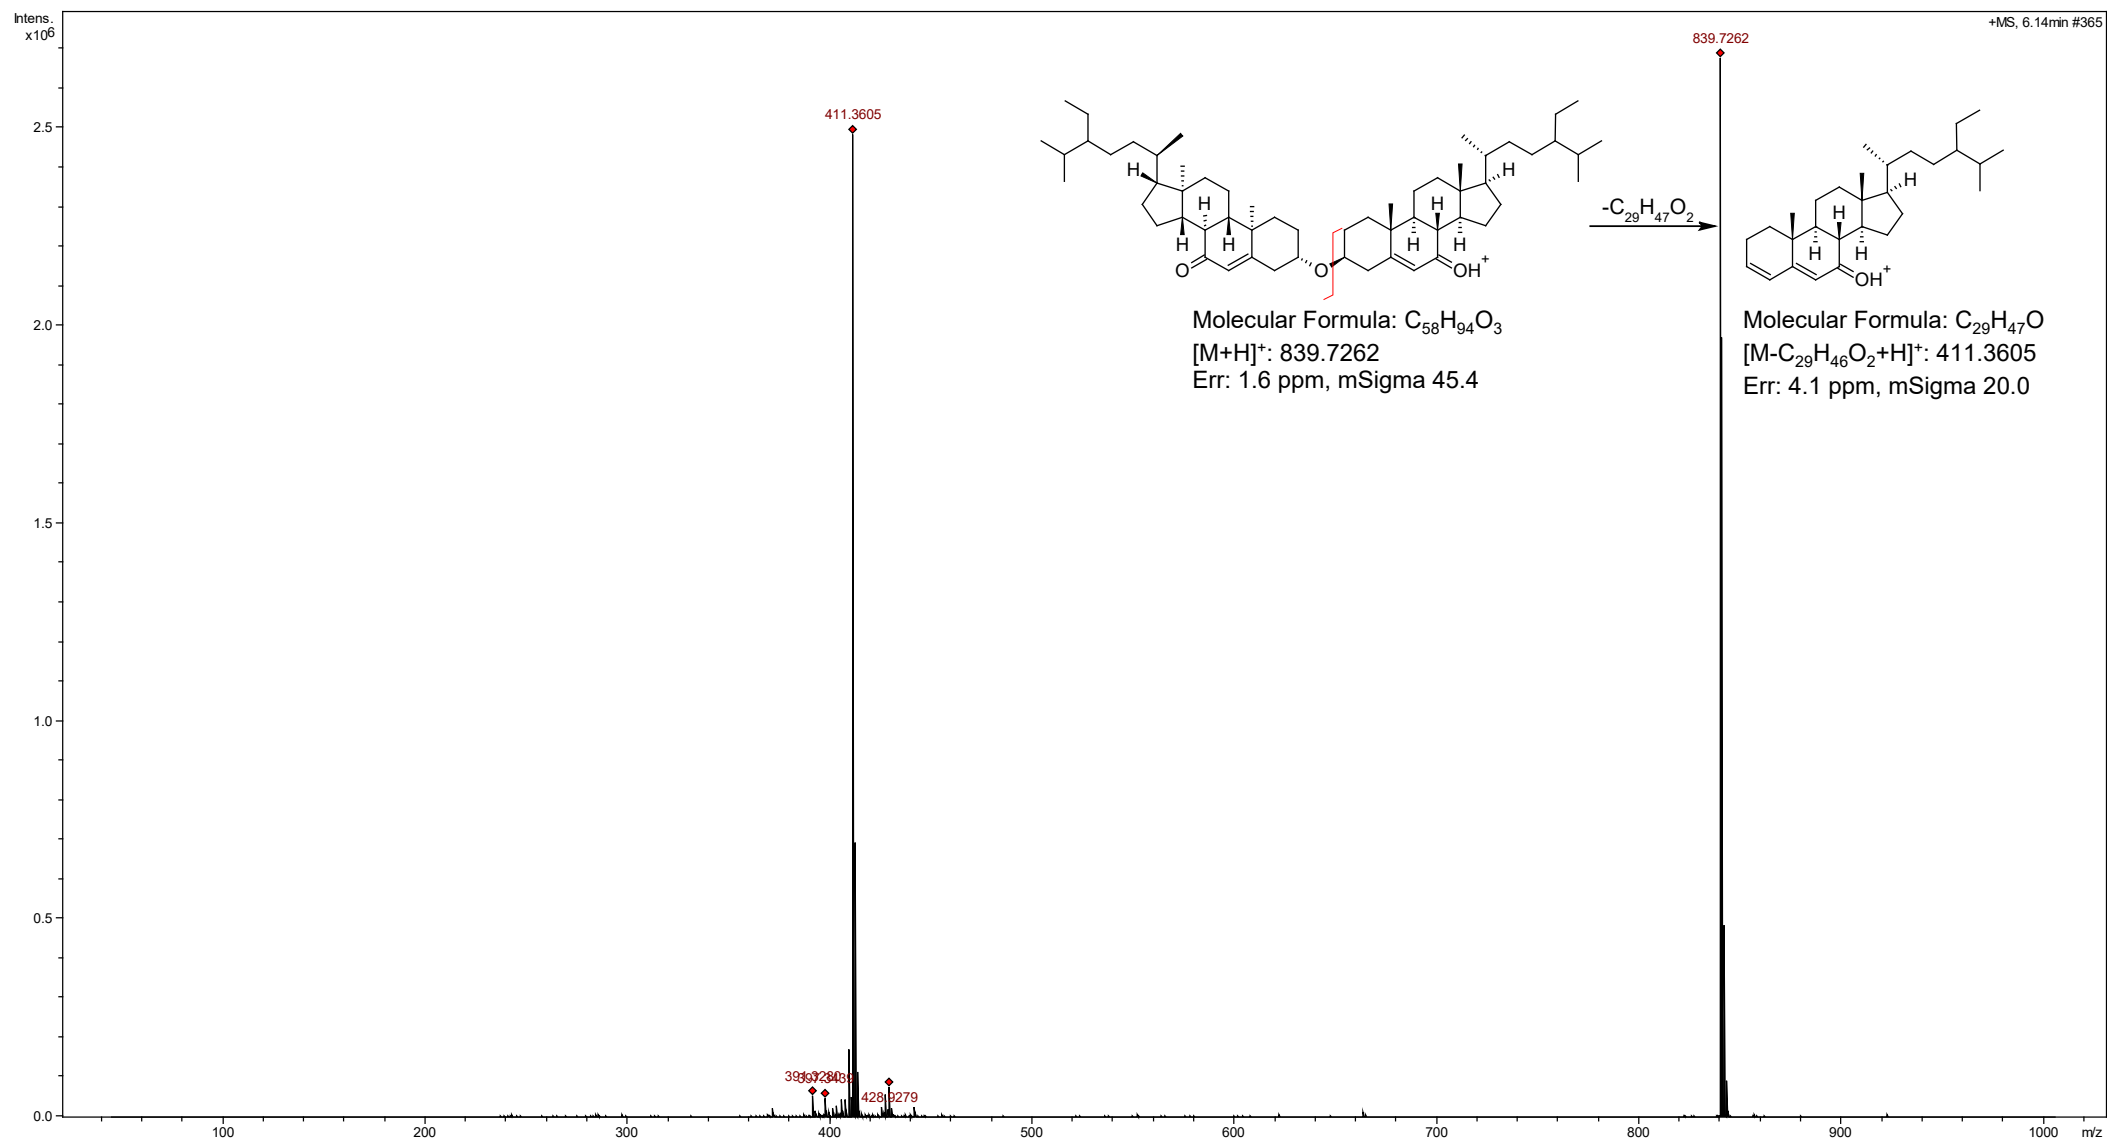

Figure S24. Mass spectrum of 3 $\beta$ ,3' $\beta$ -di(sitoste-5-en-7-one-3 $\beta$ -yl) ether (**8**)

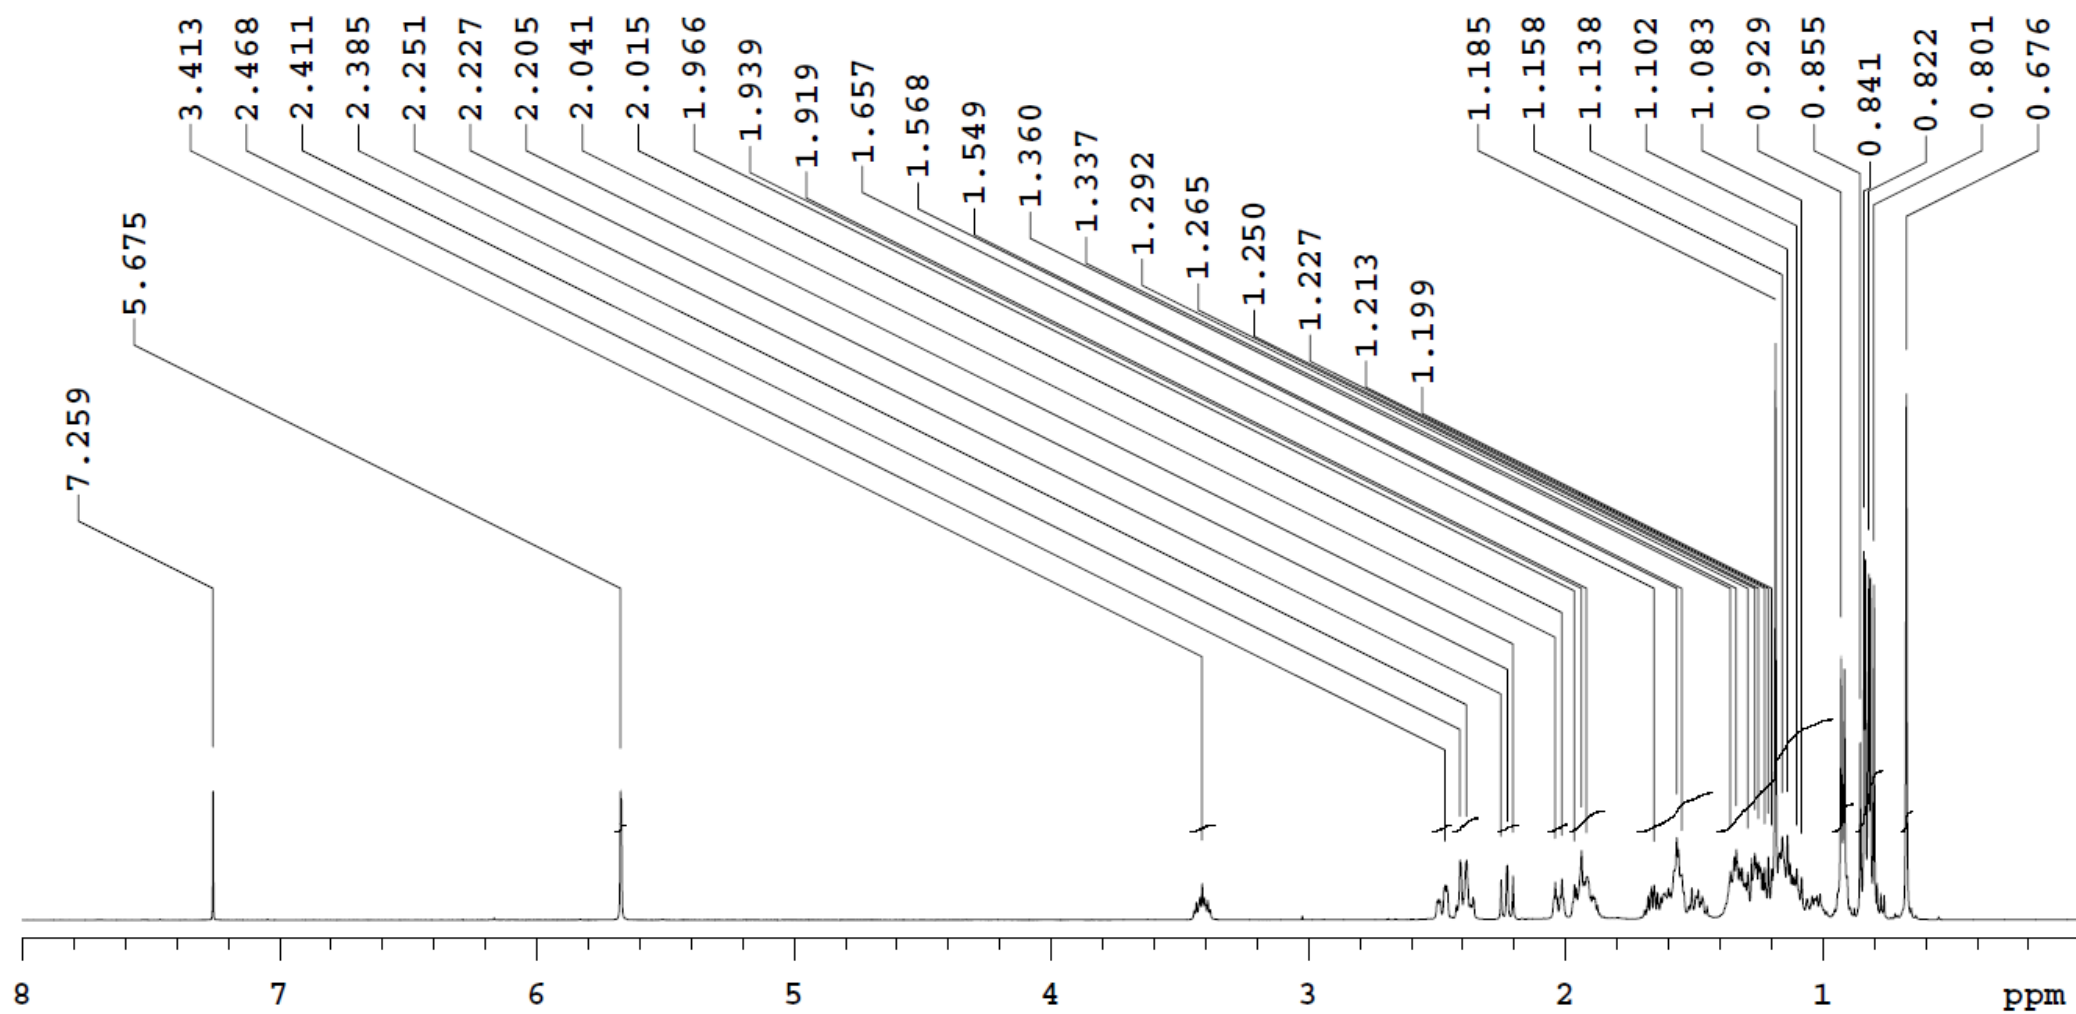

Figure S25. <sup>1</sup>H spectrum of 3β,3'β-di(sitoste-5-en-7-one-3β-yl) ether (**8**) in CDCl<sub>3</sub>

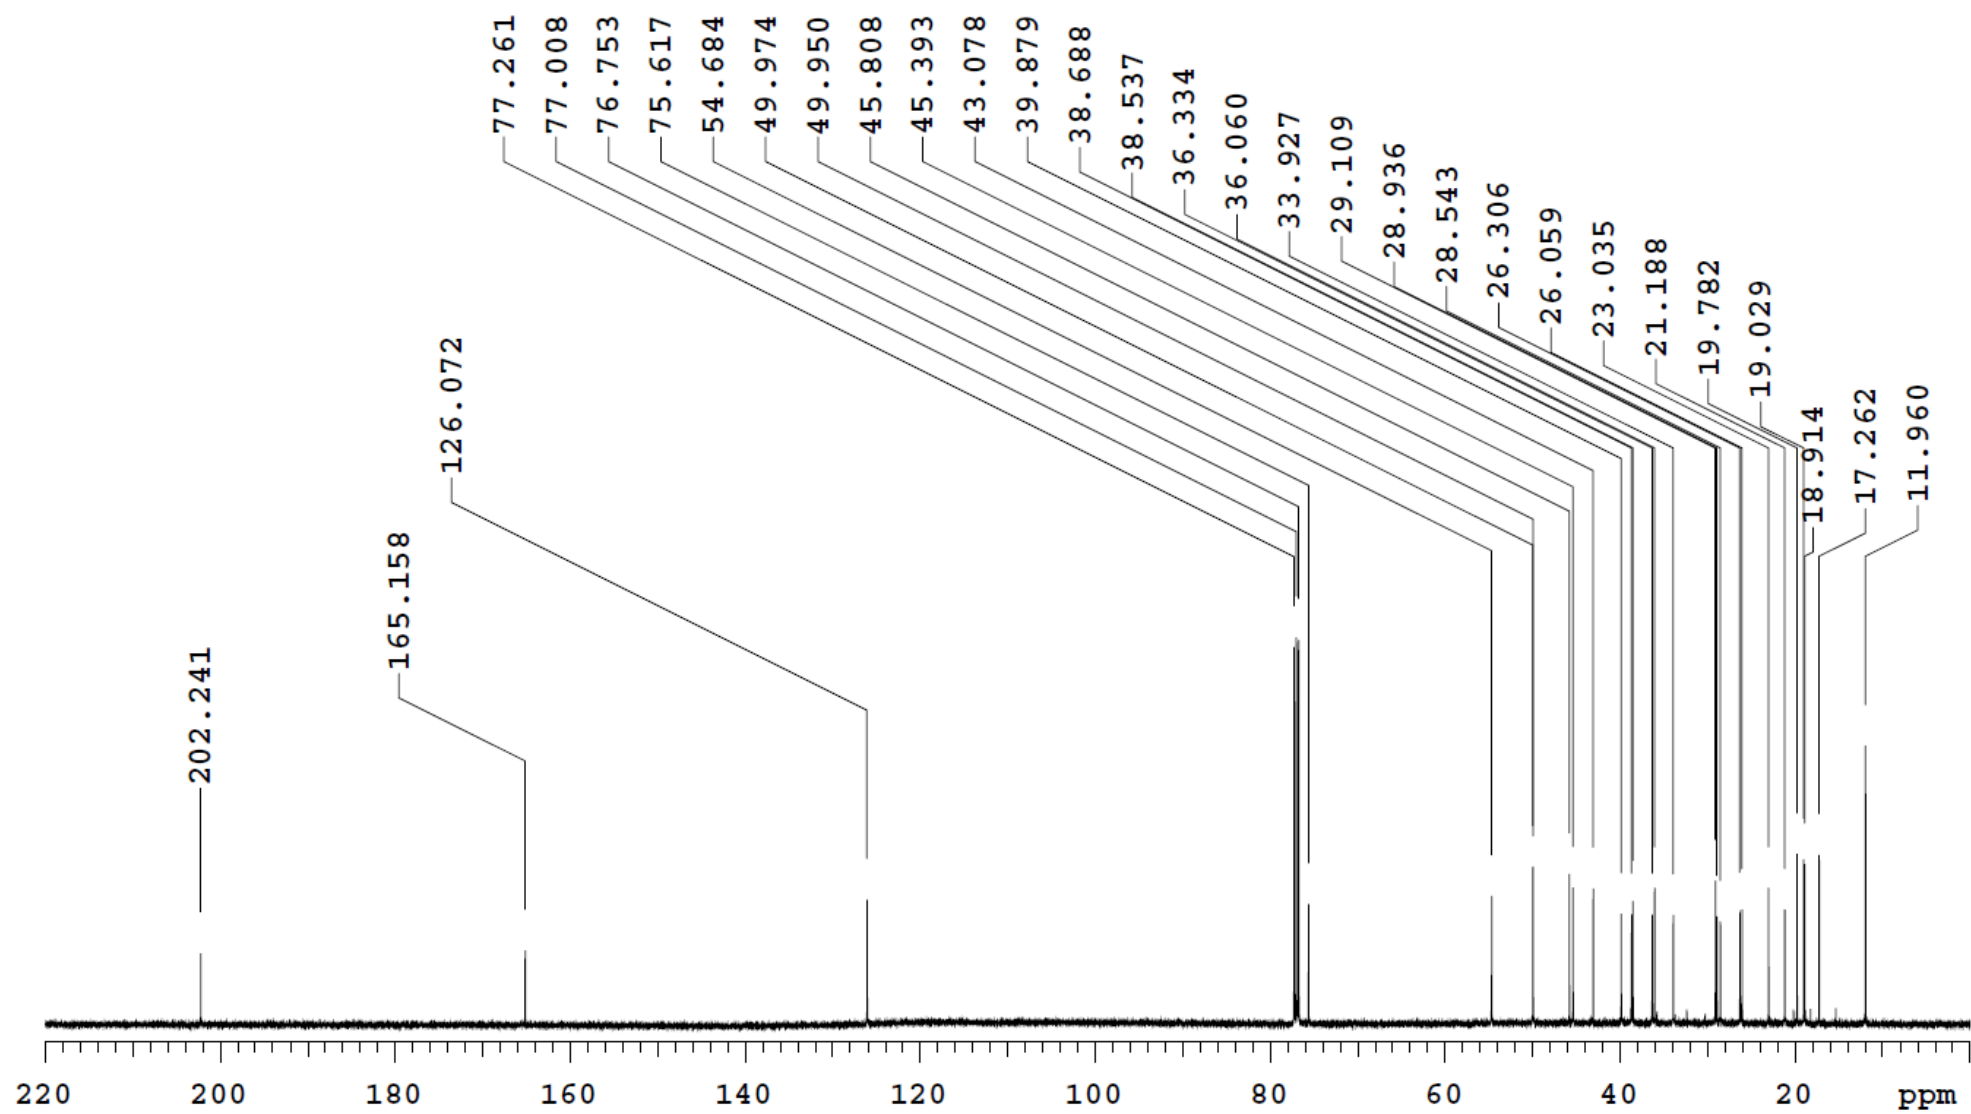

Figure S26. <sup>13</sup>C spectrum of 3β,3'β-di(sitost-5-en-7-one-3β-yl) ether (**8**) in CDCl<sub>3</sub>

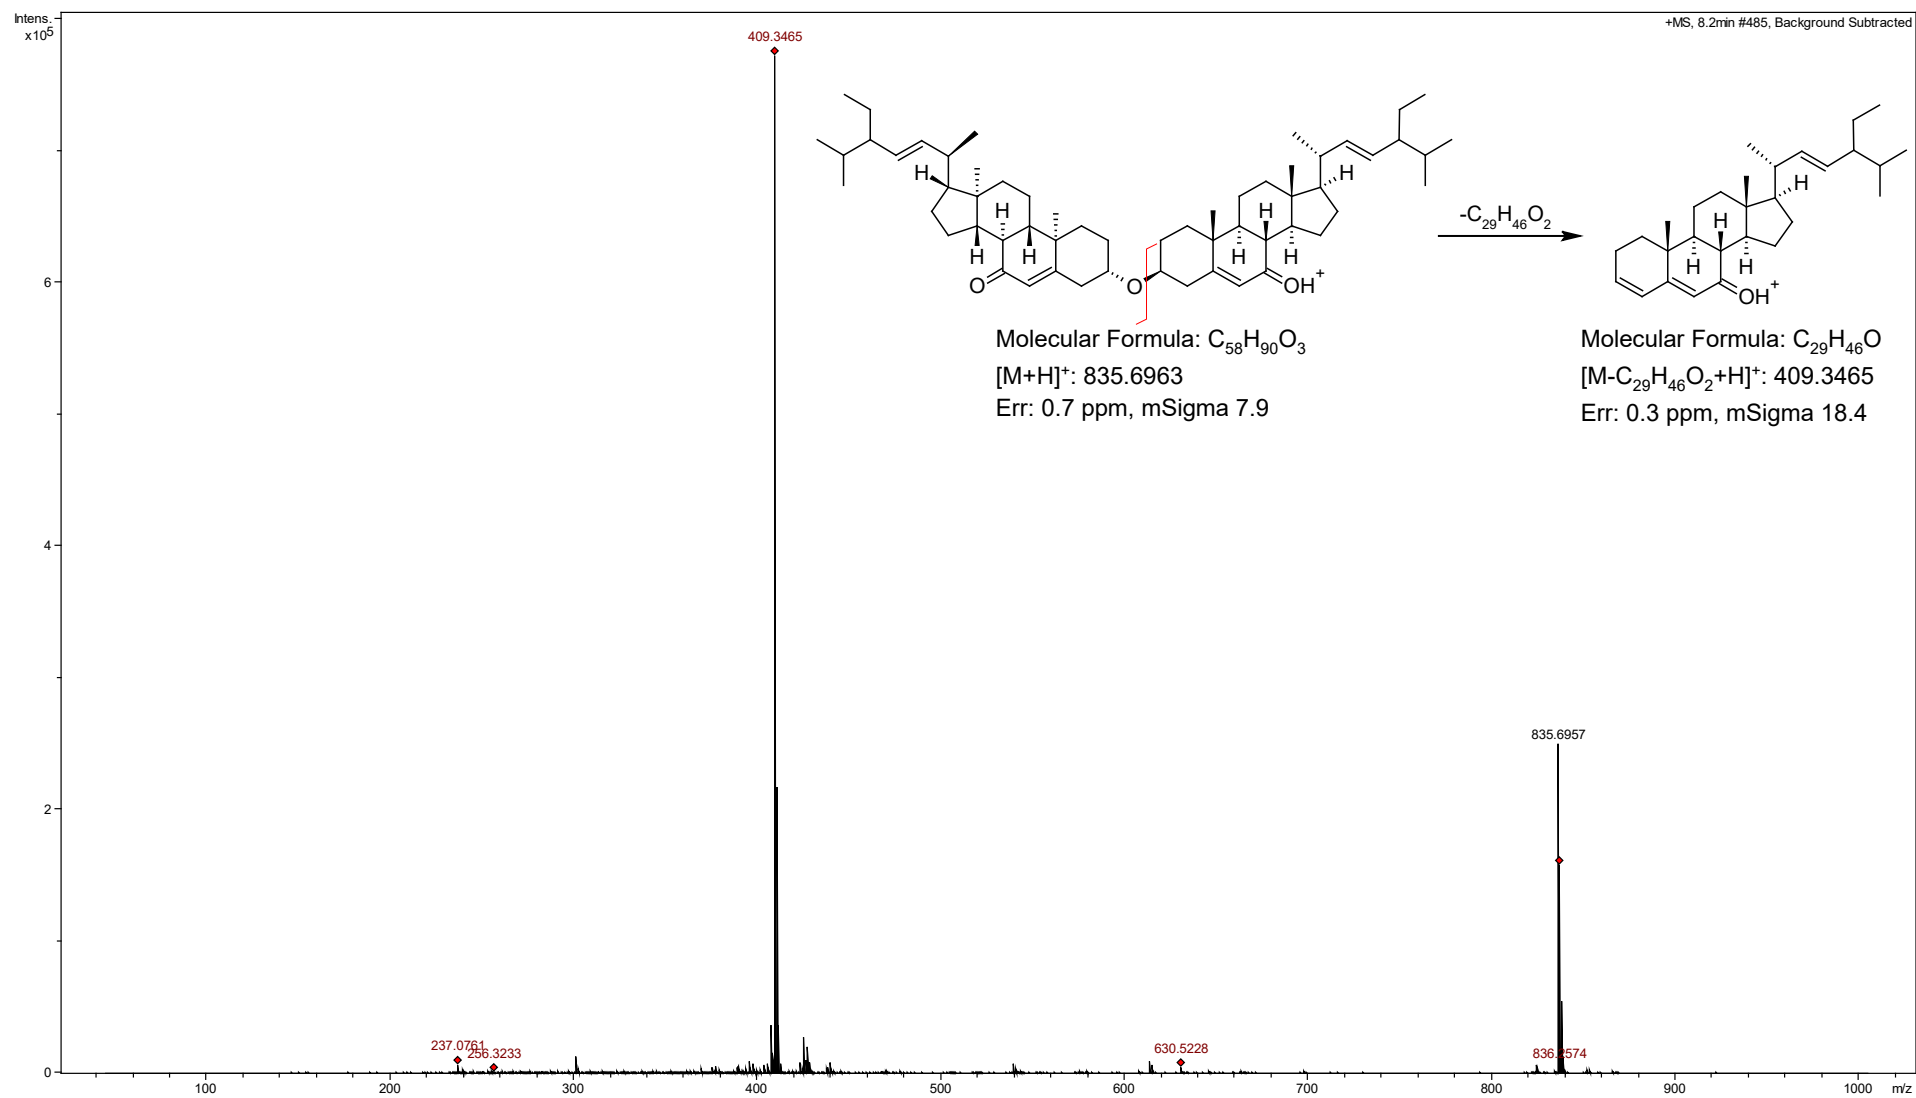

Figure S27. Mass spectrum of 3β,3'β-di(stigmast-5-en-7-one-3β-yl) ether (**9**)

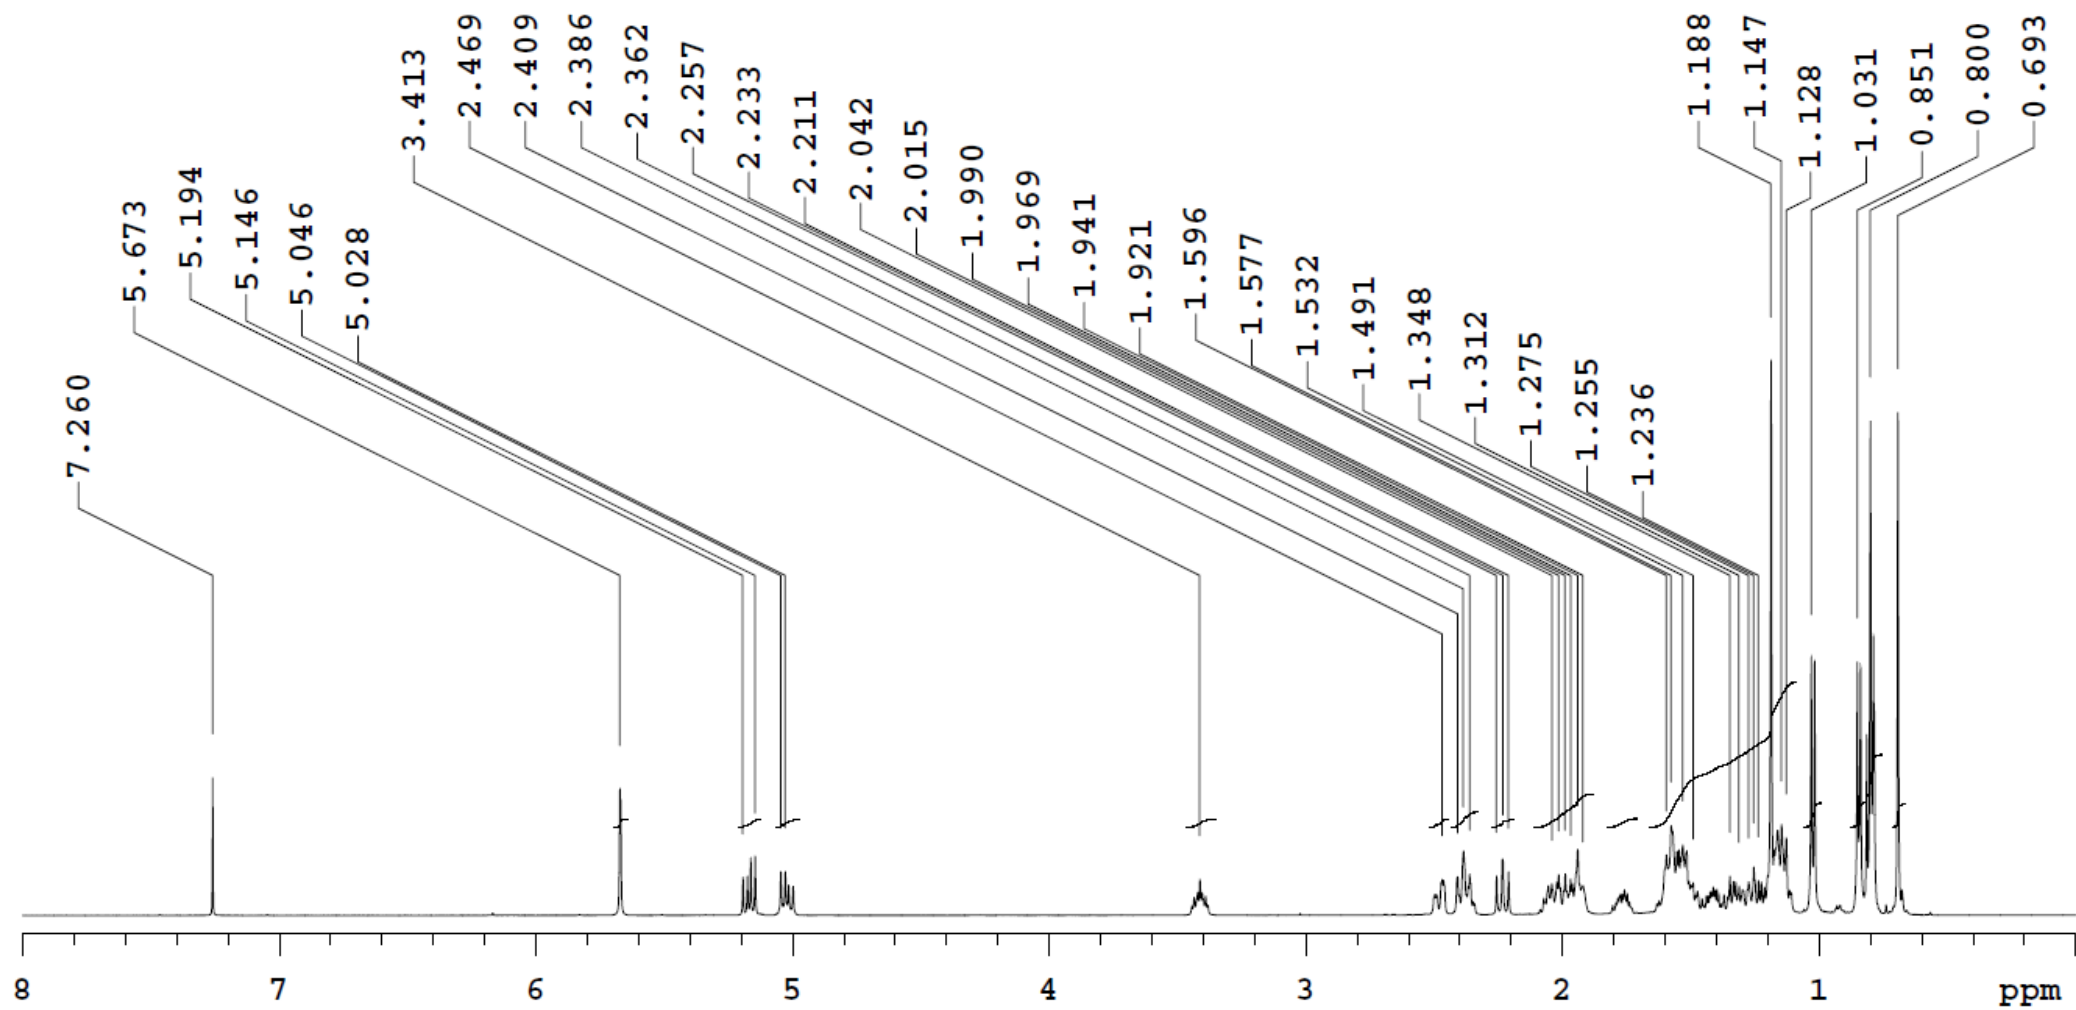

Figure S28. <sup>1</sup>H spectrum of 3β,3'β-di(stigmast-5-en-7-one-3β-yl) ether (9) in CDCl<sub>3</sub>

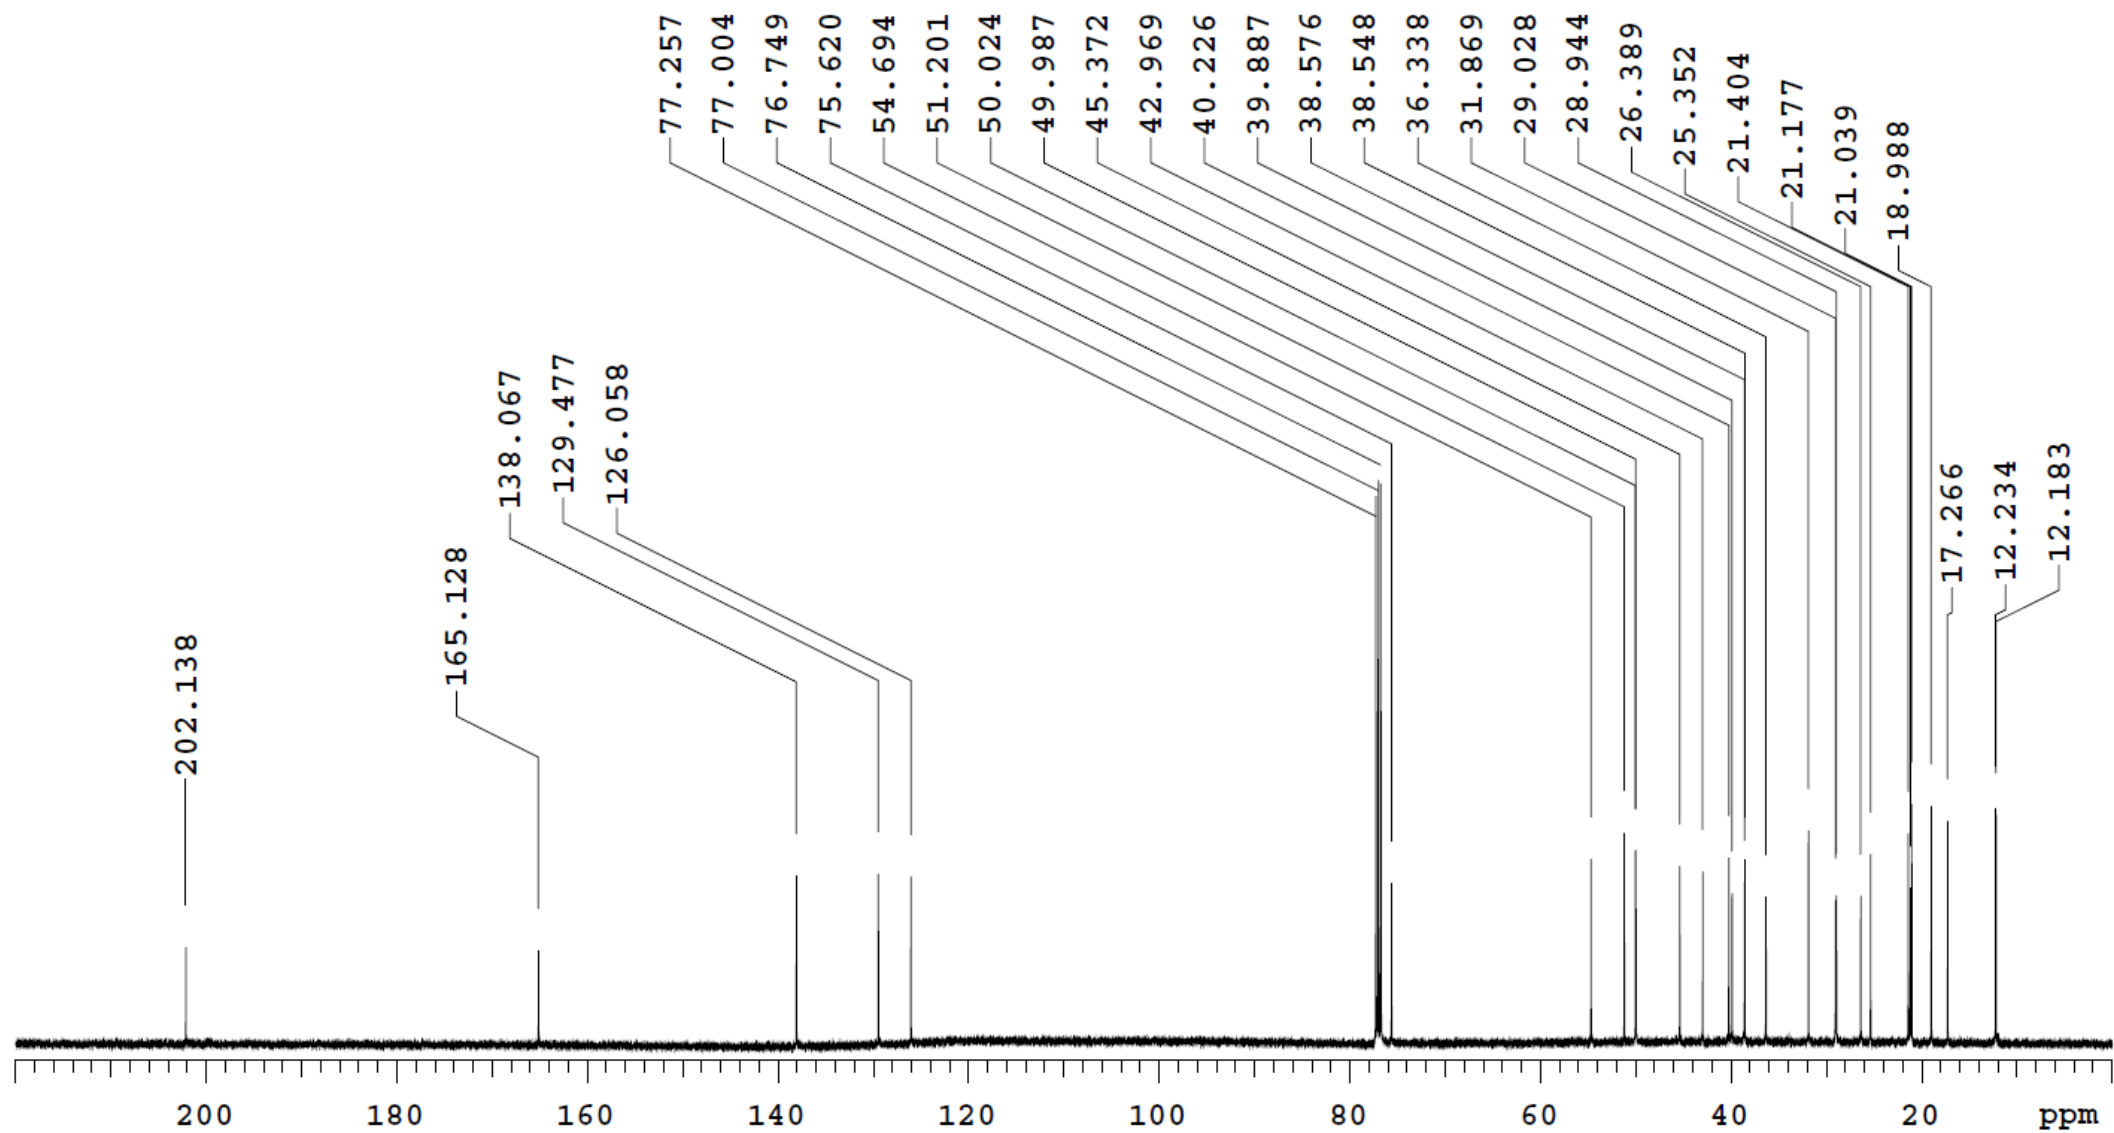

Figure S29. <sup>13</sup>C spectrum of 3β,3'β-di(stigmast-5-en-7-one-3β-yl) ether (**9**) in CDCl<sub>3</sub>

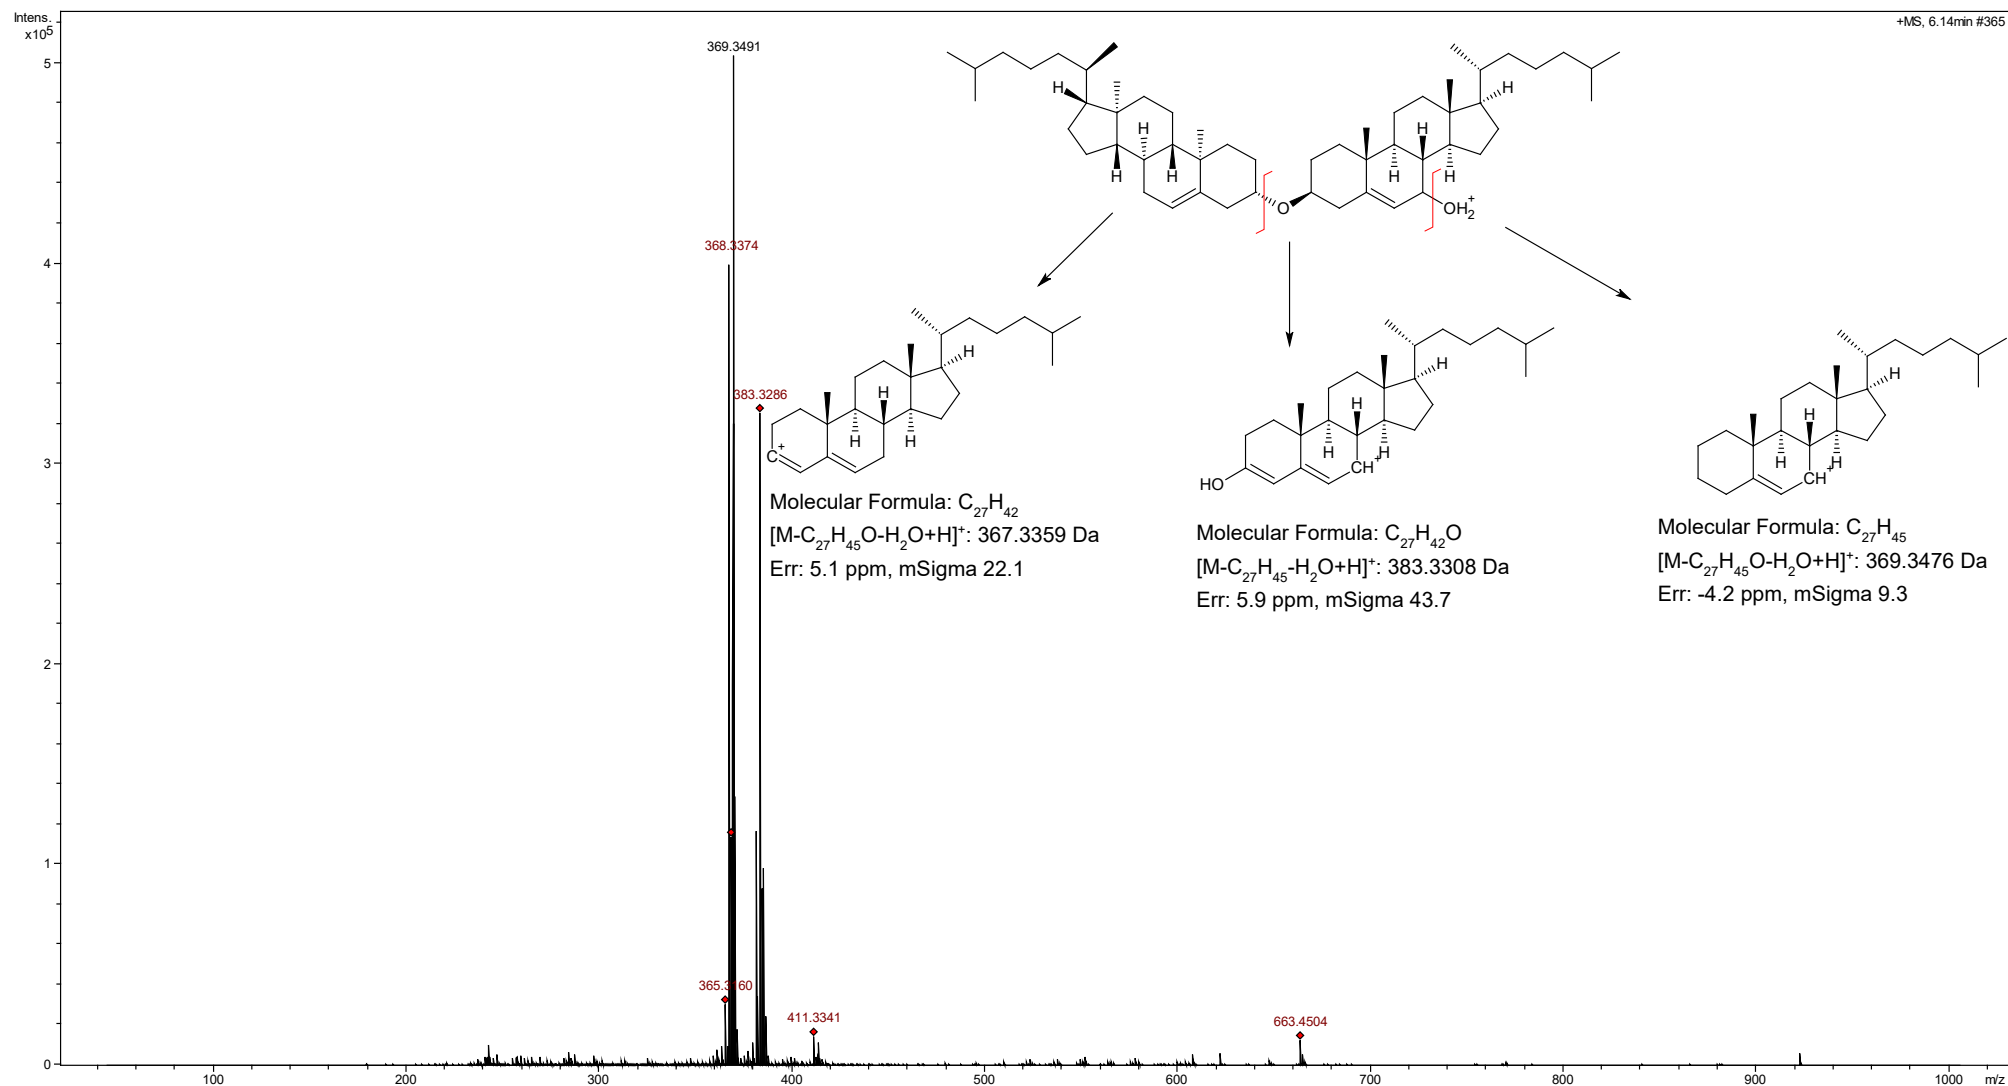

Figure S30. Mass spectrum of cholest-5-en-3 $\beta$ ,7 $\alpha$ -diol-cholesterol ether (7 $\alpha$ -hydroxycholesteryl-cholesterol ether) (**10**)

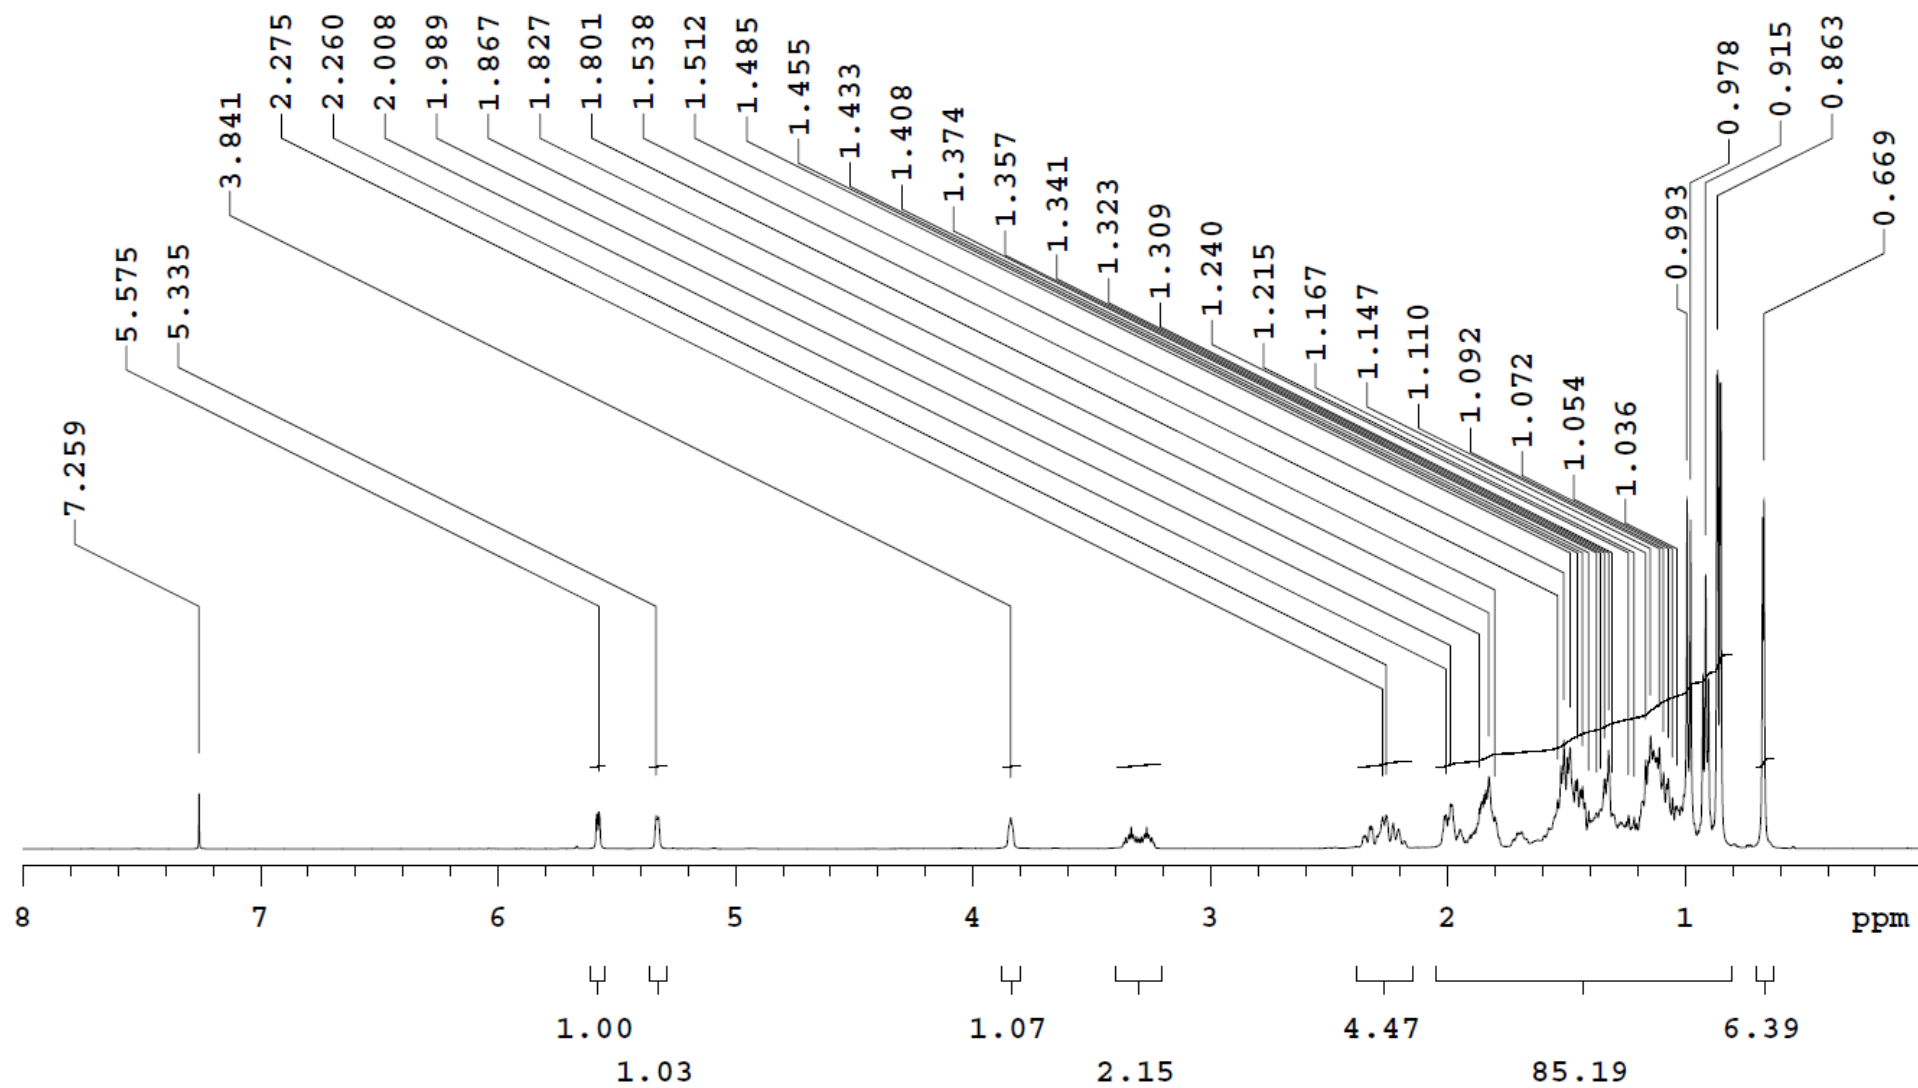

Figure S31. <sup>1</sup>H spectrum of cholest-5-en-3β,7α-diol-cholesterol ether (7α-hydroxycholesteryl-cholesterol ether) (**10**) in CDCl<sub>3</sub>

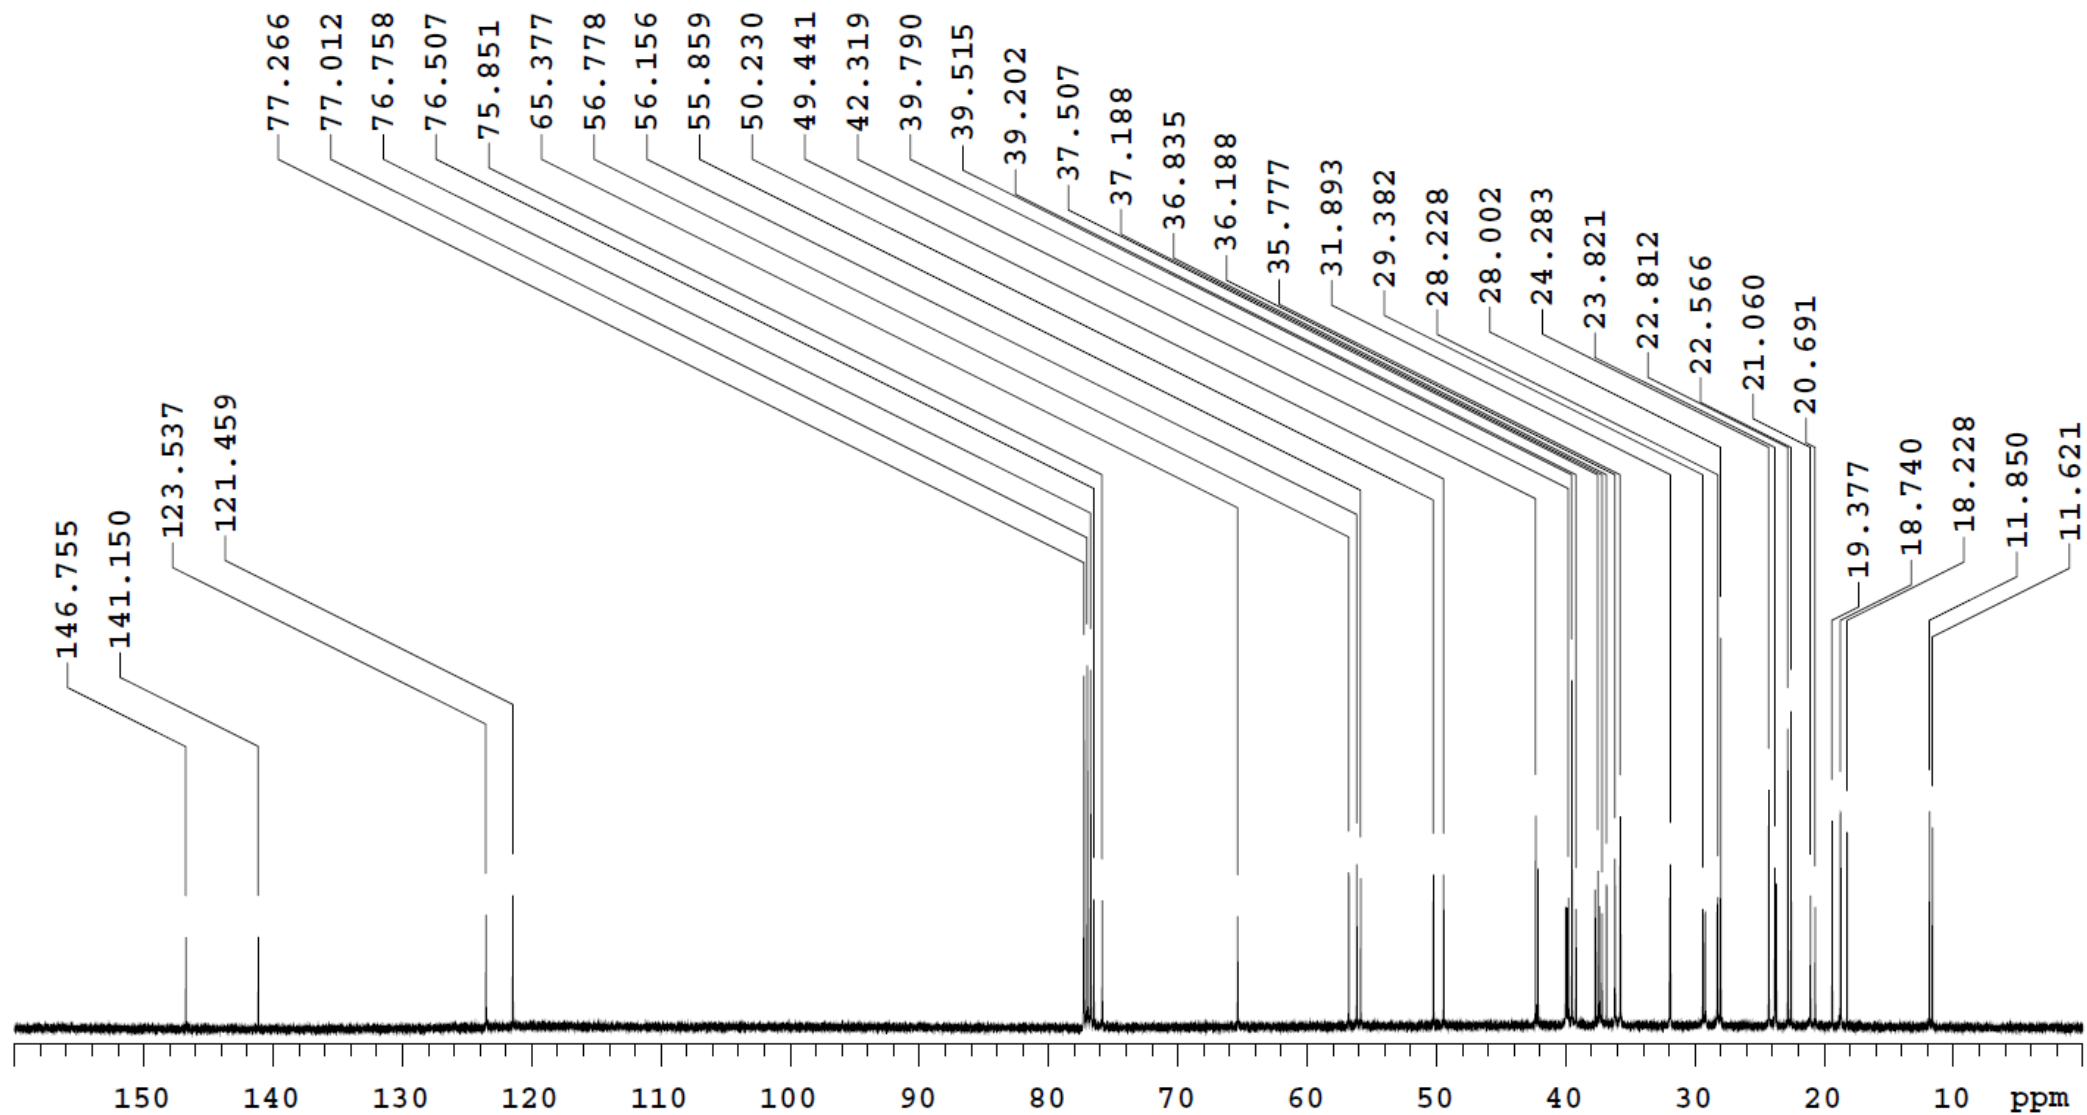

Figure S32. <sup>13</sup>C spectrum of cholest-5-en-3β,7α-diol-cholesterol ether (7α-hydroxycholesteryl-cholesterol ether) (**10**) in CDCl<sub>3</sub>

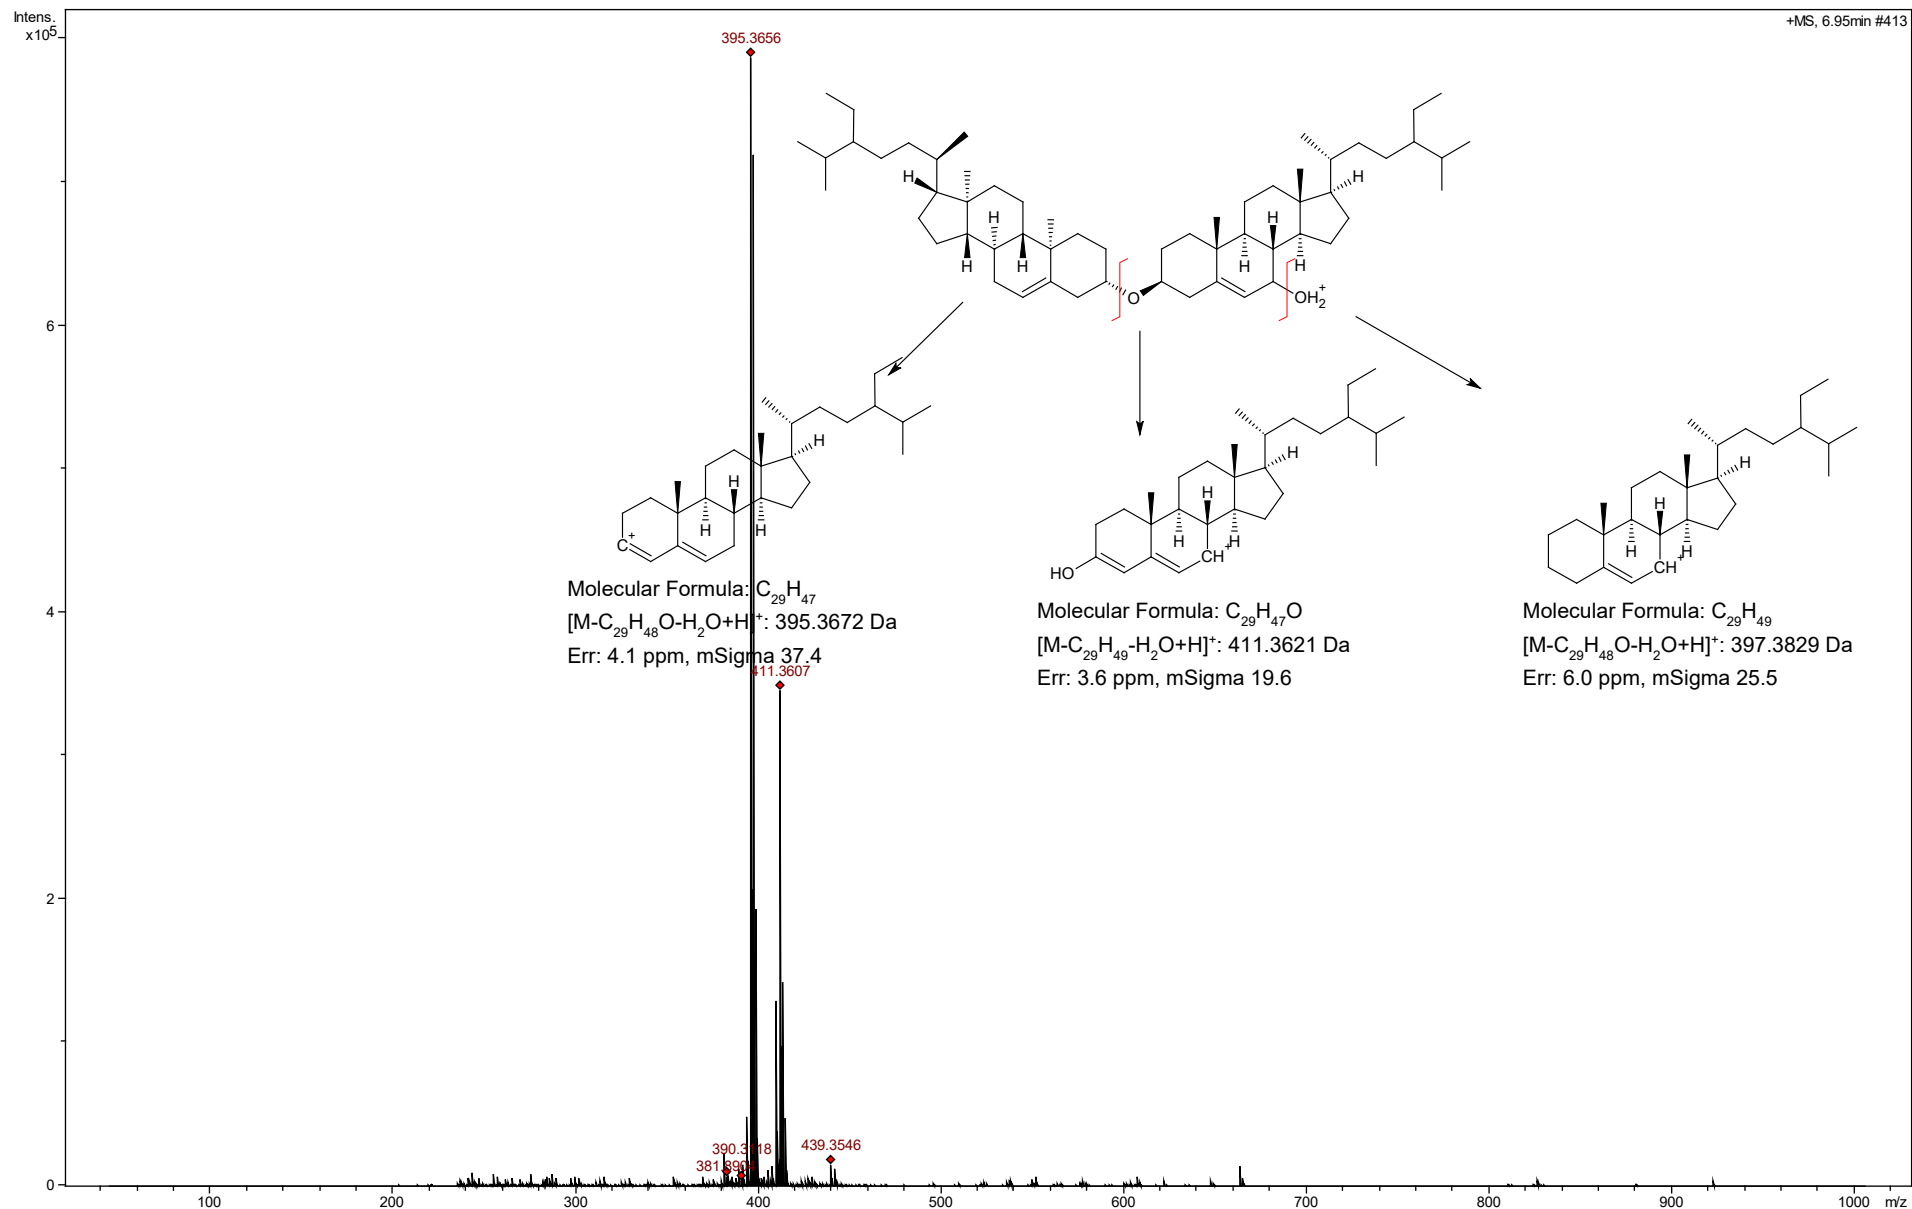

Figure S33. Mass spectrum of sitost-5-en-3β,7α-diol-sitosterol ether (7α-hydroxysitosteryl-sitosterol ether) (**11**).

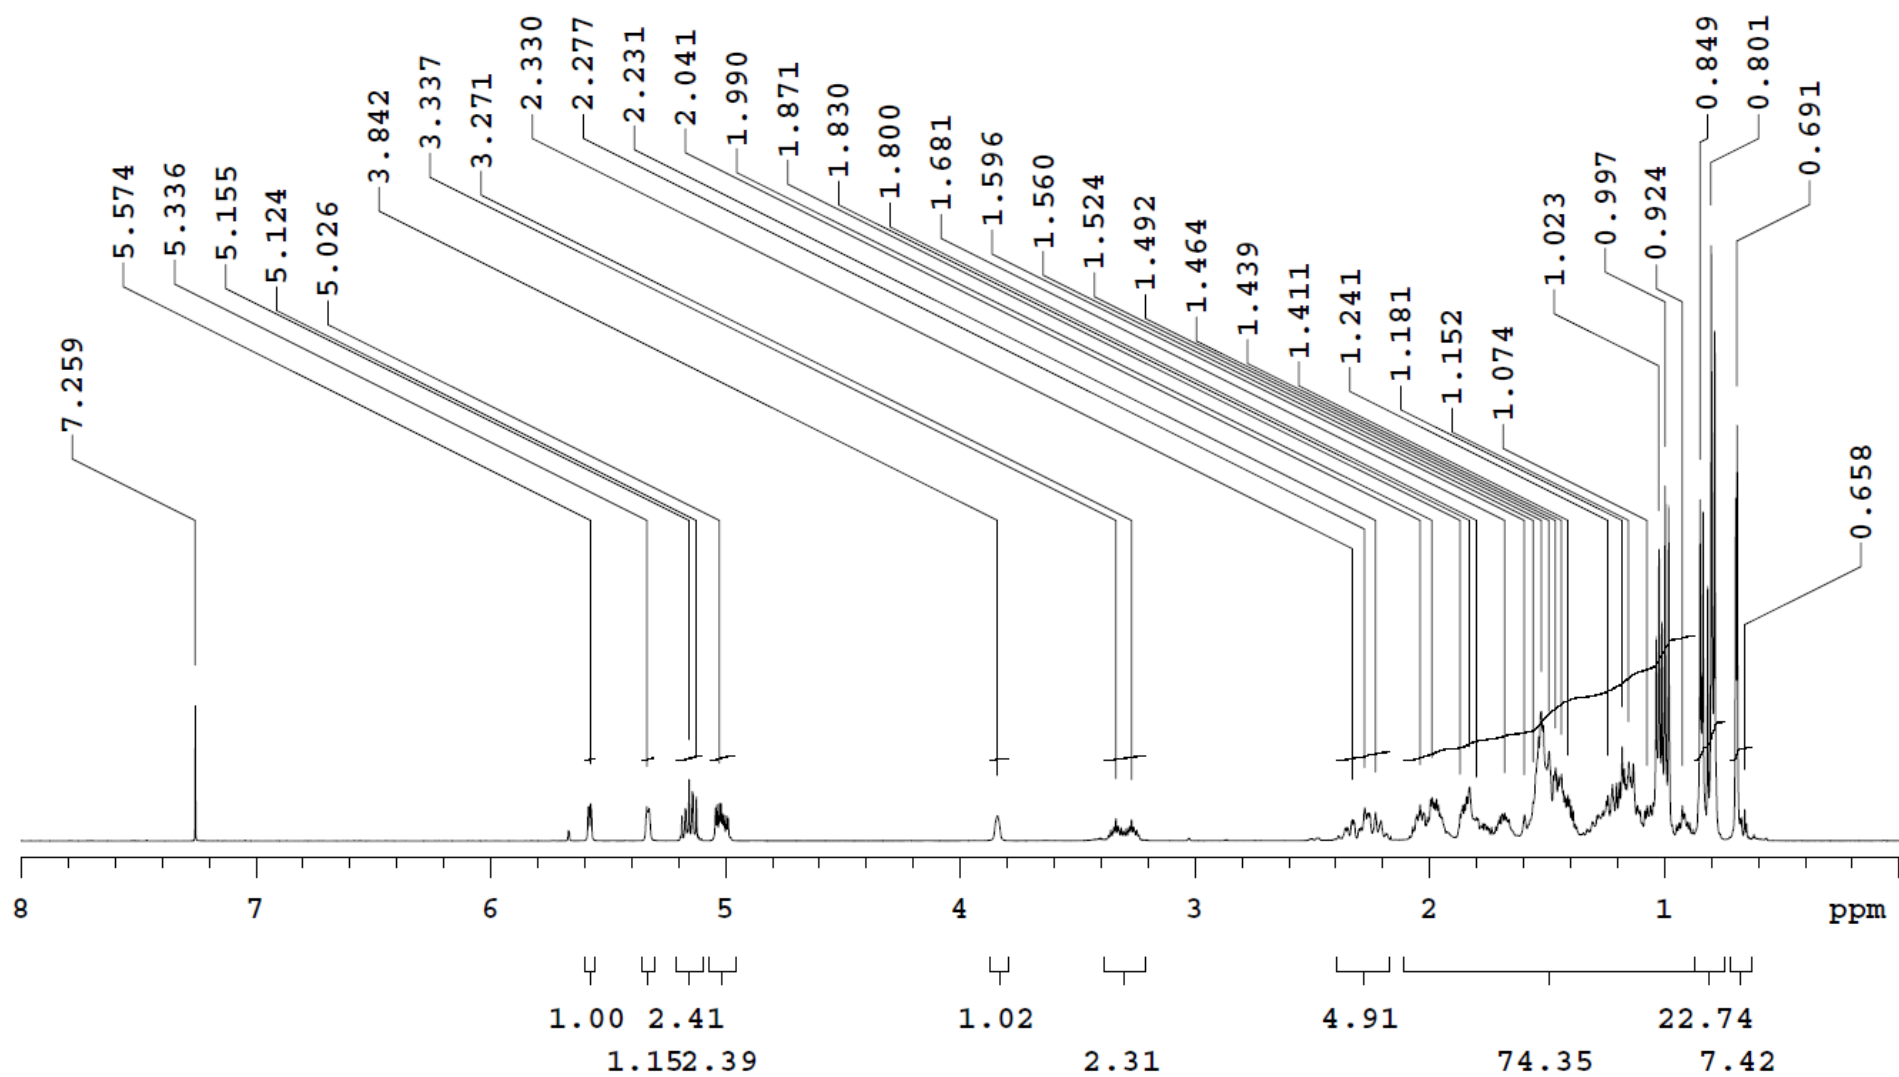

Figure S34. <sup>1</sup>H spectrum of sitost-5-en-3 $\beta$ ,7 $\alpha$ -diol-sitosterol ether (7 $\alpha$ -hydroxysitosteryl-sitosterol ether) (**11**) in CDCl<sub>3</sub>.

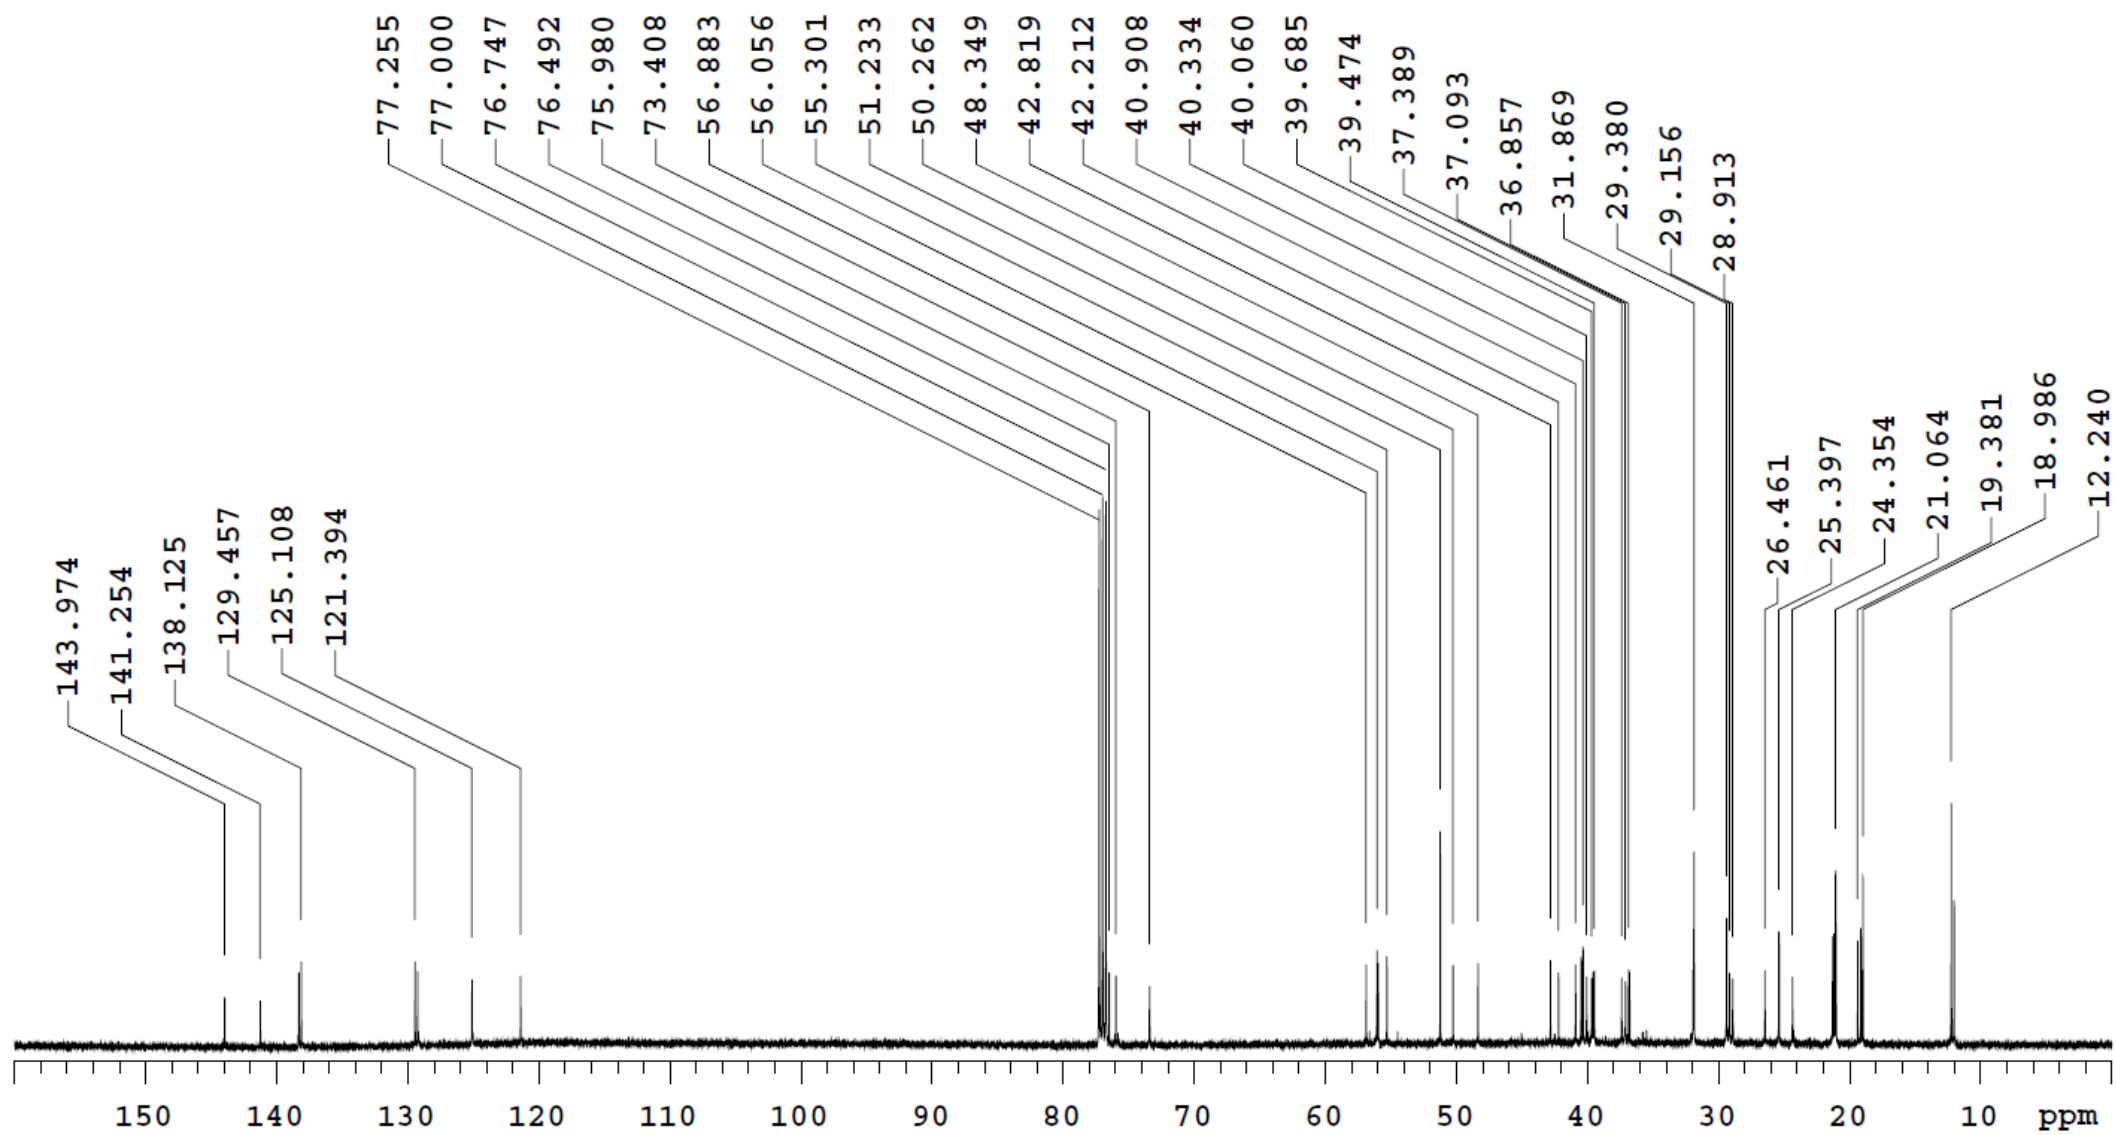

Figure S35. <sup>13</sup>C spectrum of sitost-5-en-3β,7α-diol-sitosterol ether (7α-hydroxysitosteryl-sitosterol ether) (**11**) in CDCl<sub>3</sub>

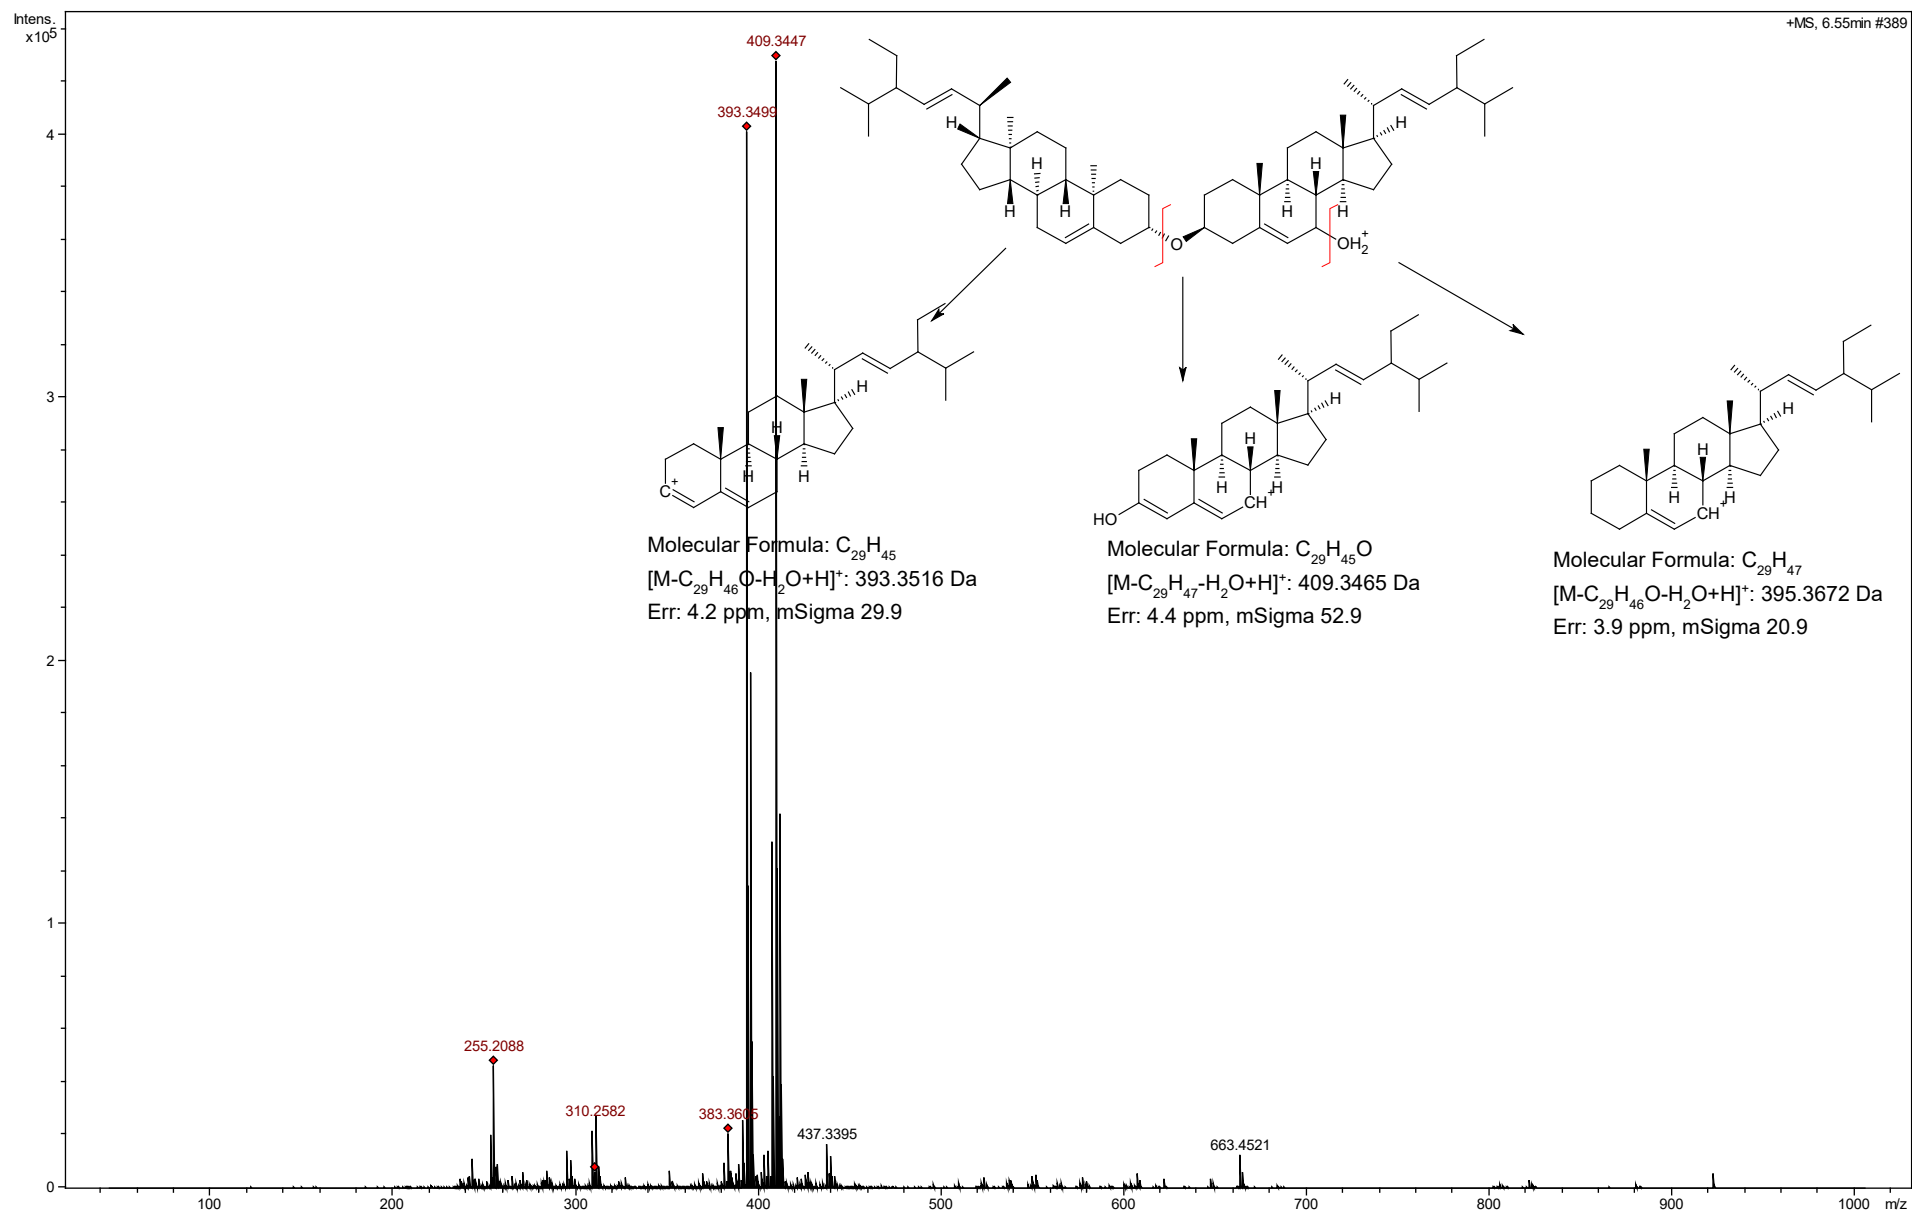

Figure S36. Mass spectrum of stigmast-5-en-3β,7α-diol-stigmasterol ether (7α-hydroxystigmasteryl-stigmasterol ether) (12).

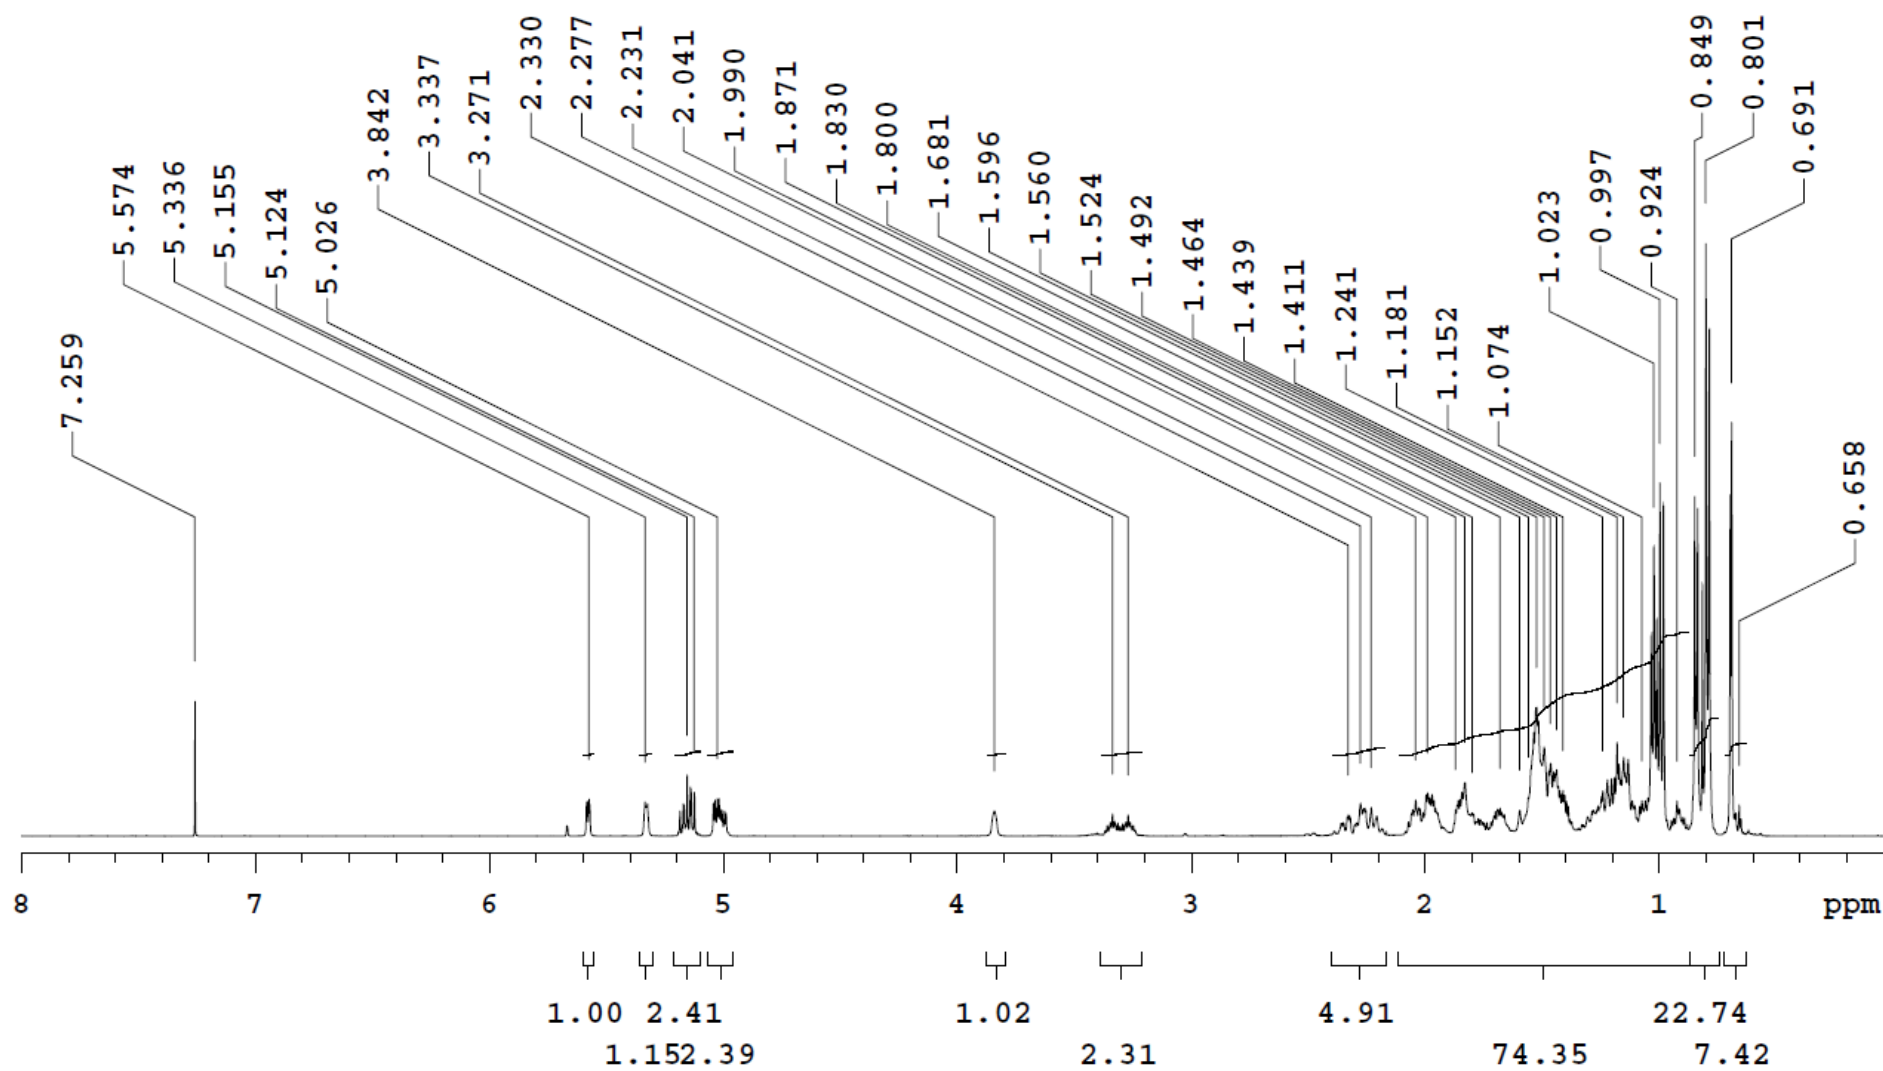

Figure S37. <sup>1</sup>H spectrum of stigmast-5-en-3 $\beta$ ,7 $\alpha$ -diol-stigmasterol ether (7 $\alpha$ -hydroxystigmasteryl-stigmasterol ether) (**12**) in CDCl<sub>3</sub>.

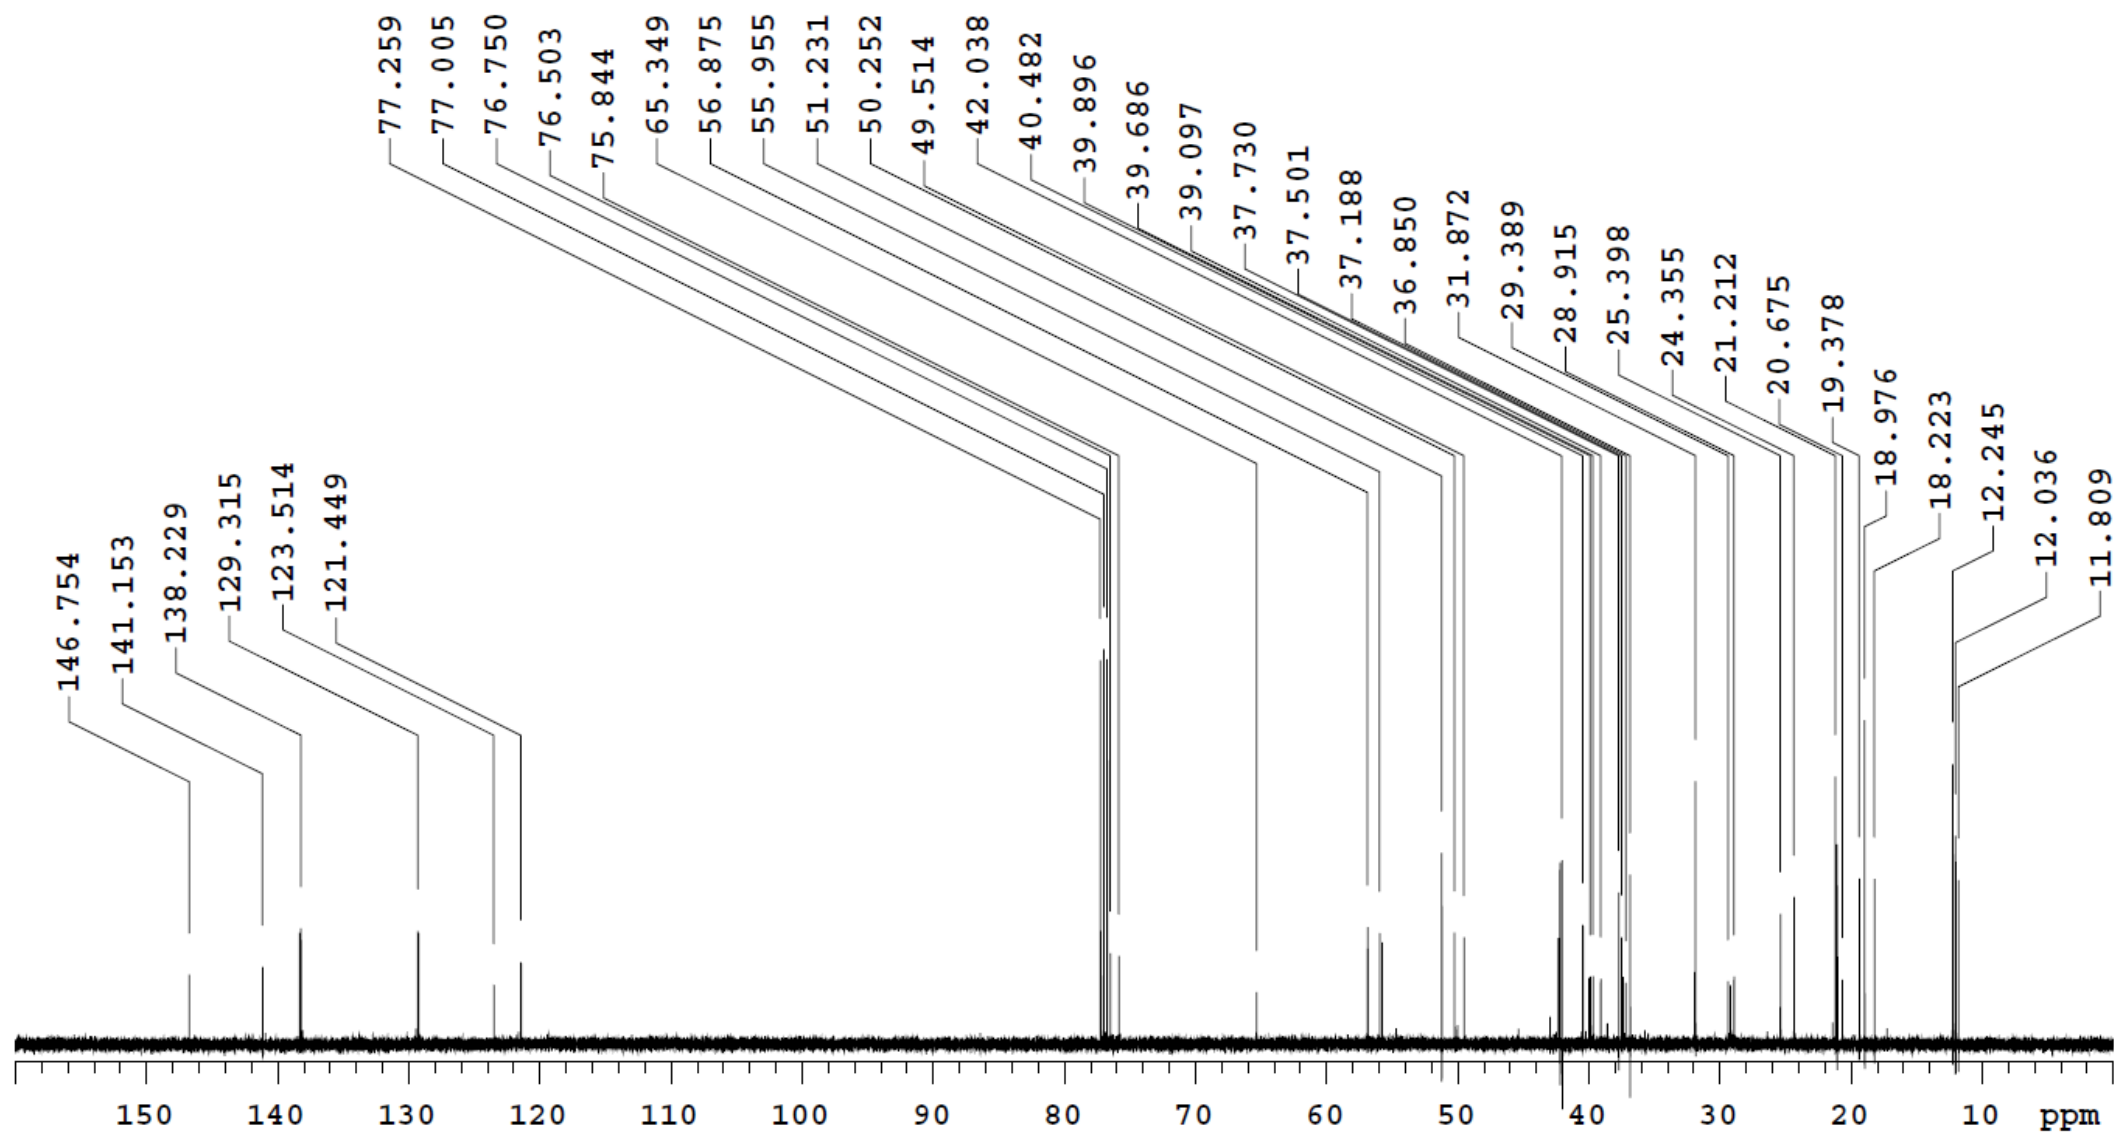

Figure S38. <sup>13</sup>C spectrum of stigmast-5-en-3β,7α-diol-stigmasterol ether (7α-hydroxystigmasteryl-stigmasterol ether) (**12**) in CDCl<sub>3</sub>.



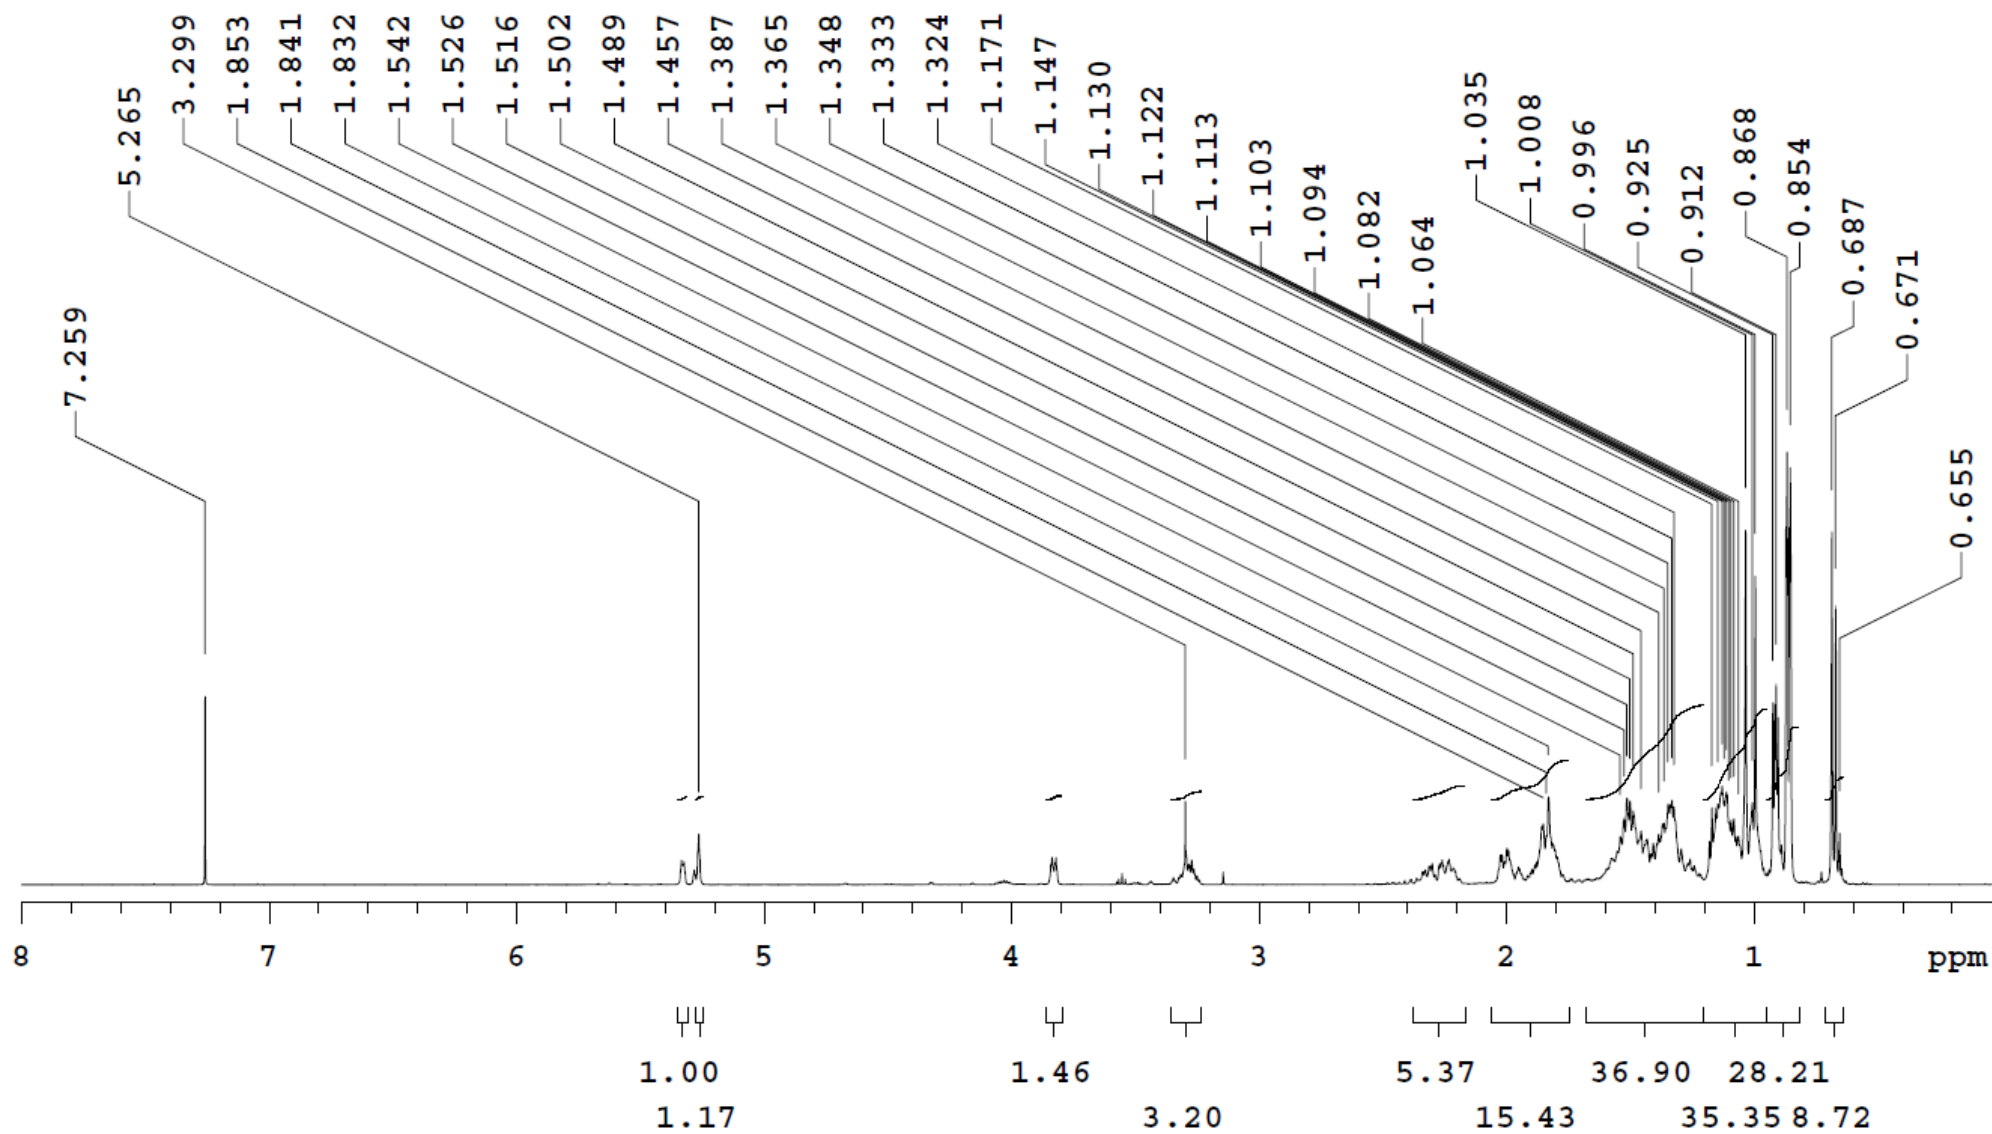

Figure S40. <sup>1</sup>H spectrum of cholest-5-en-3β,7β-diol-cholesterol ether (7β-hydroxycholesteryl-cholesterol ether) (**13**) in CDCl<sub>3</sub>.

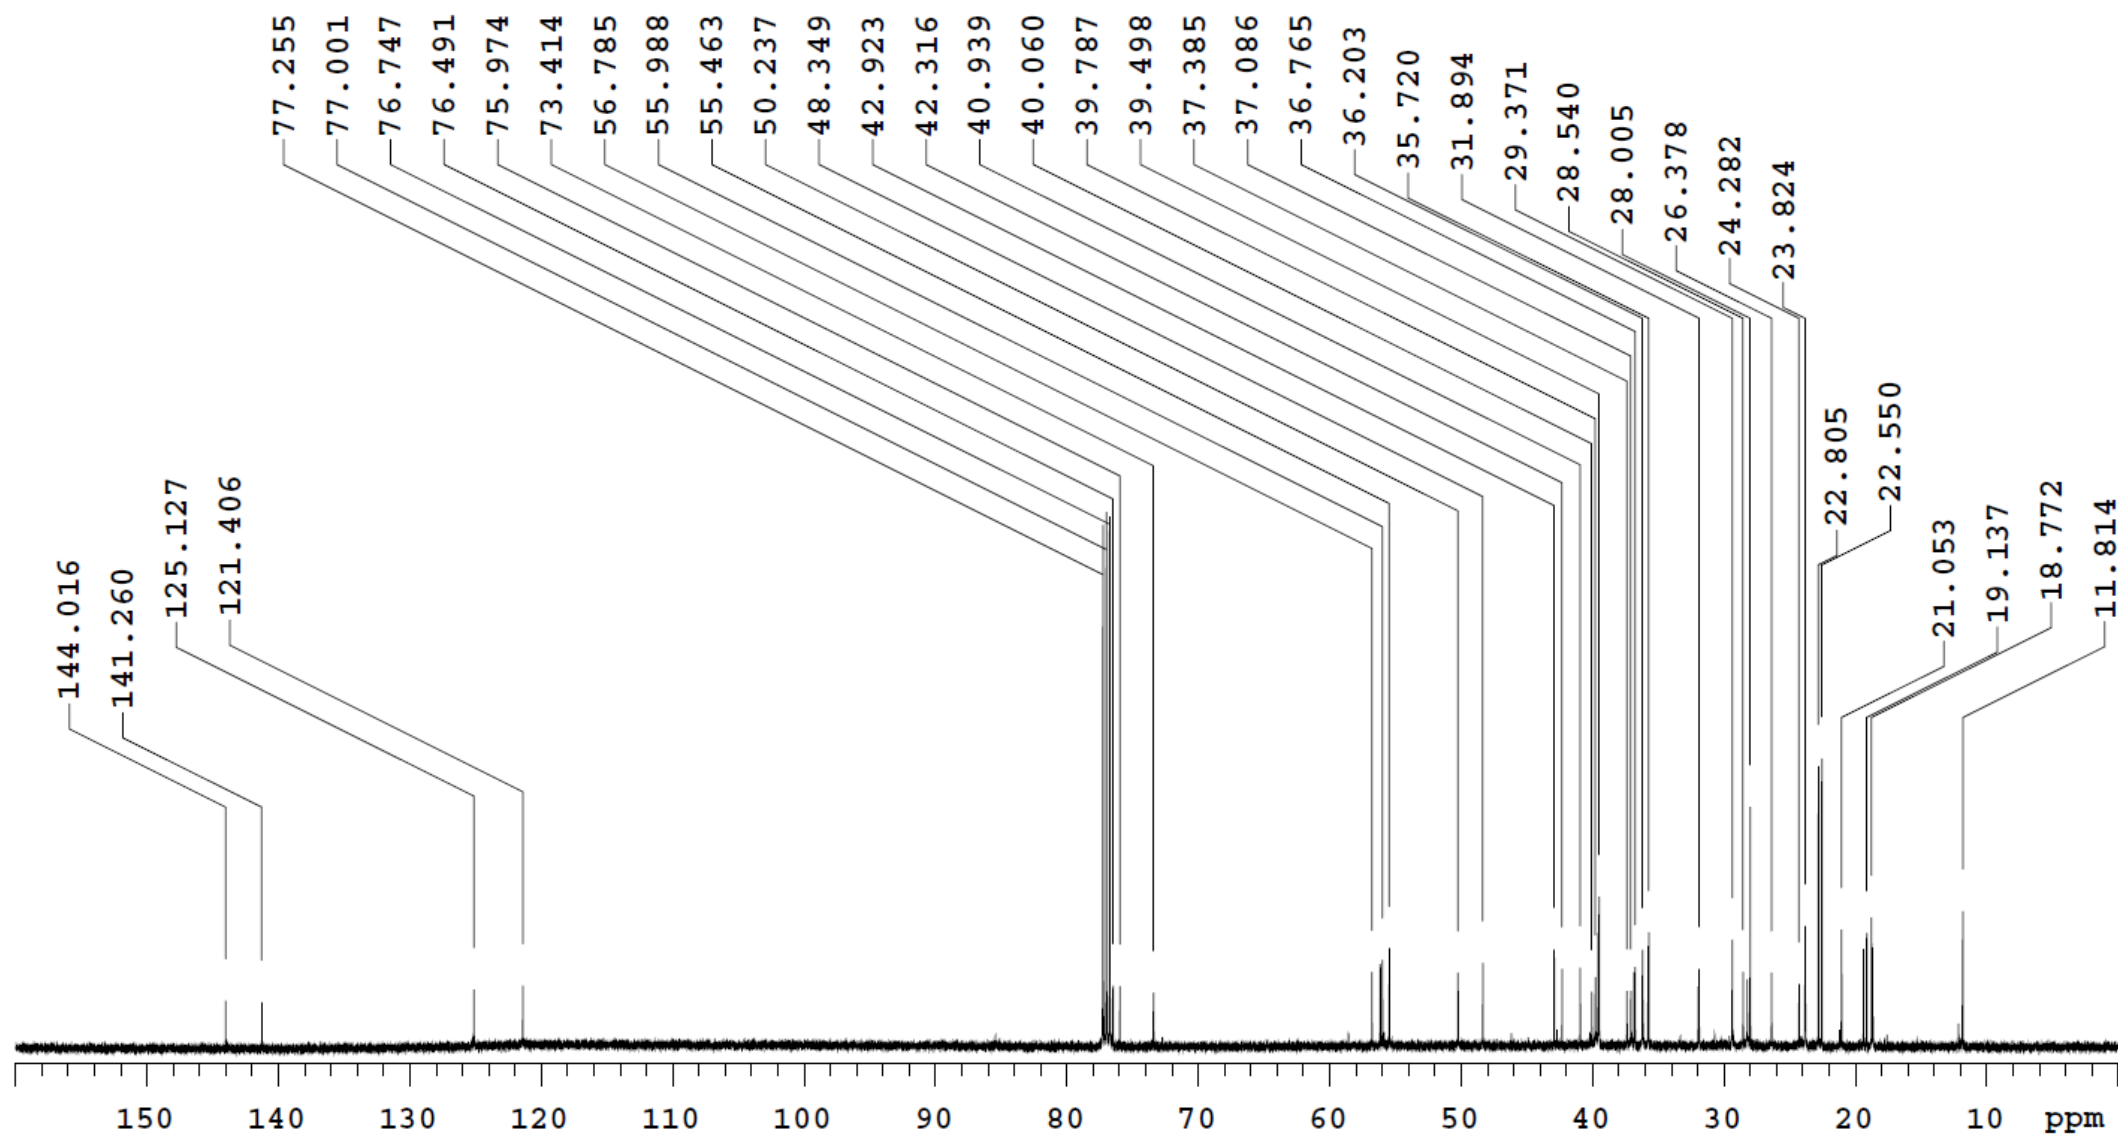

Figure S41.  $^{13}\text{C}$  spectrum of cholest-5-en-3 $\beta$ ,7 $\beta$ -diol-cholesterol ether (7 $\beta$ -hydroxycholesteryl-cholesterol ether) (**13**) in  $\text{CDCl}_3$ .

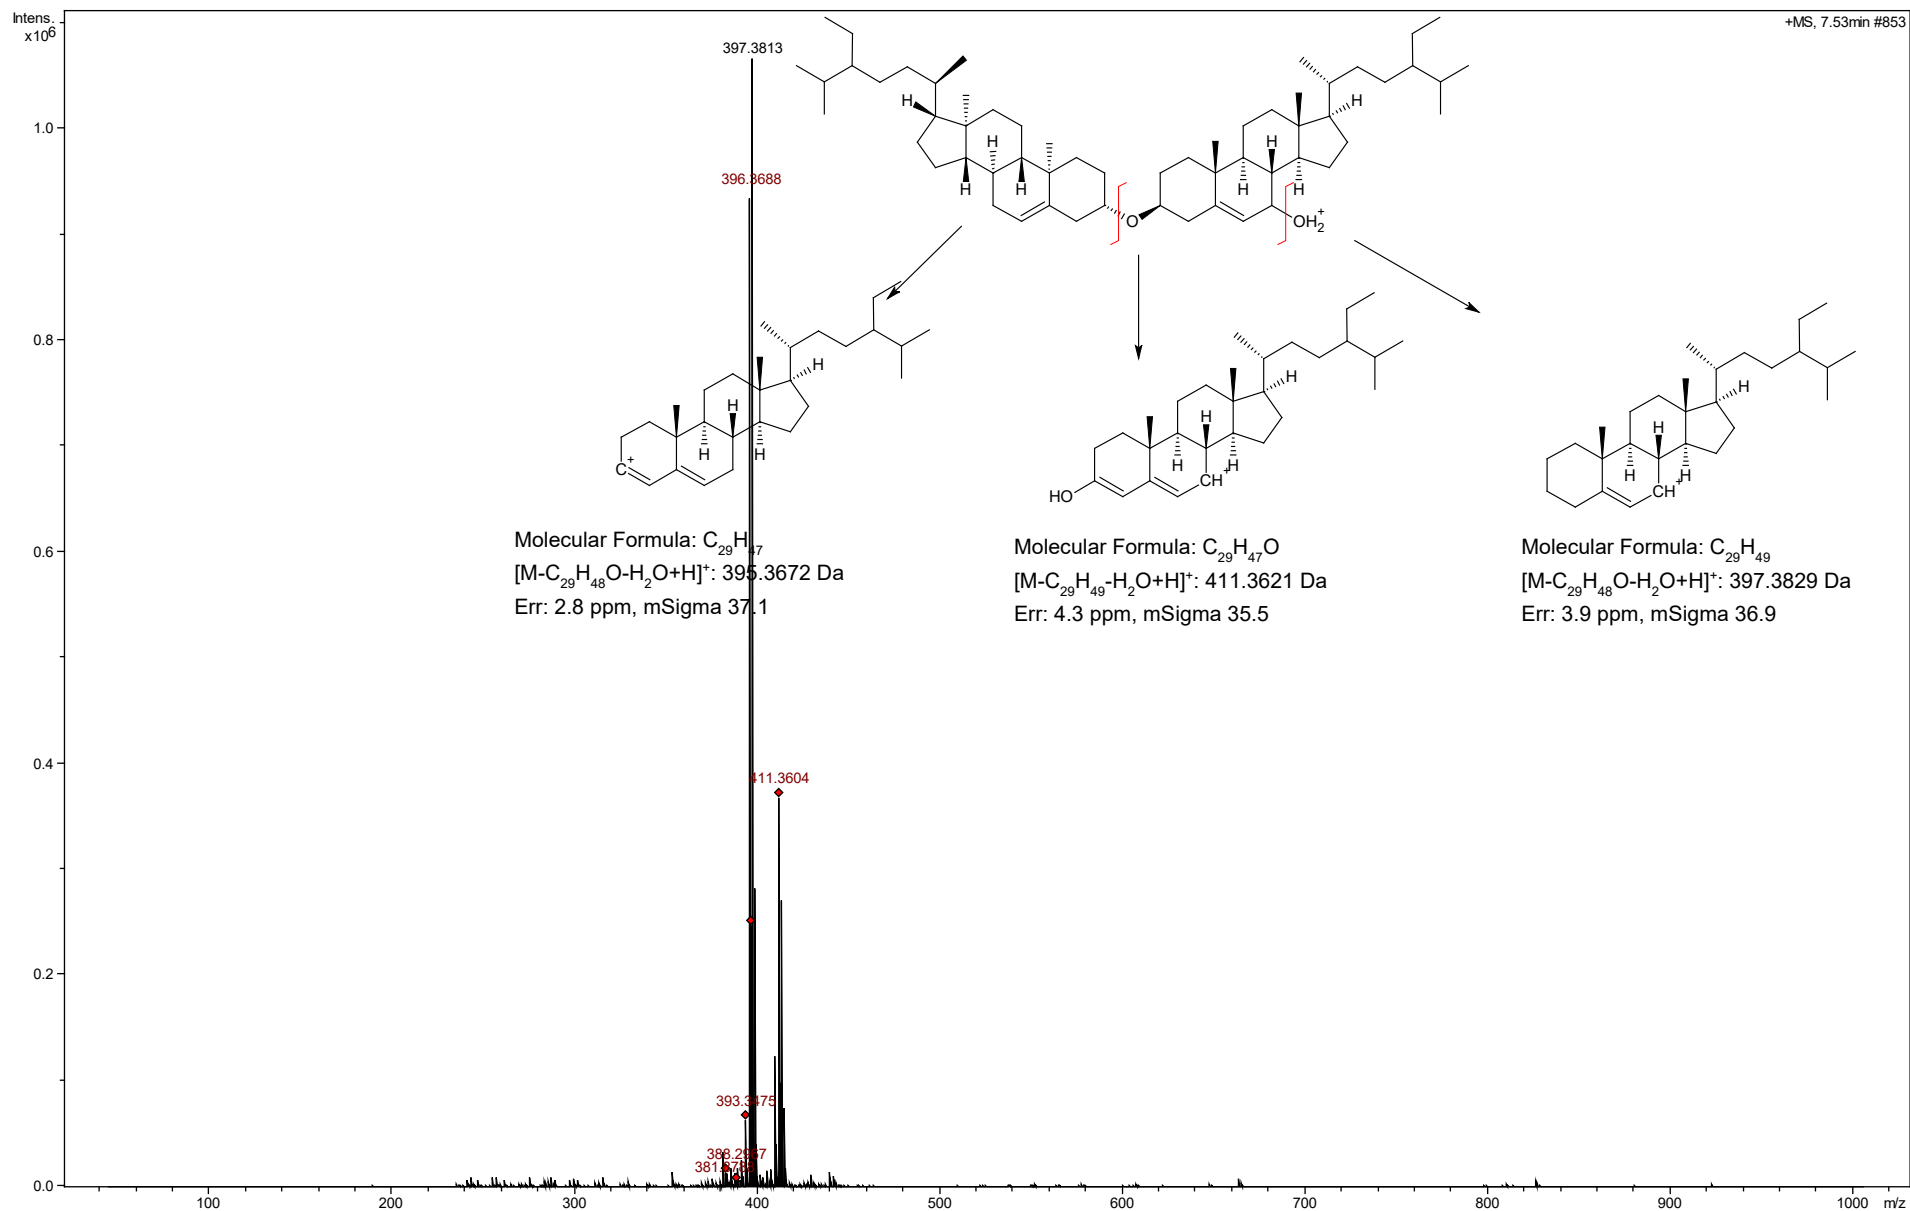

Figure S42. Mass spectrum of sito-5-en-3 $\beta$ ,7 $\beta$ -diol-sitosterol ether (7 $\beta$ -hydroxysitosteryl-sitosterol ether) (**14**).

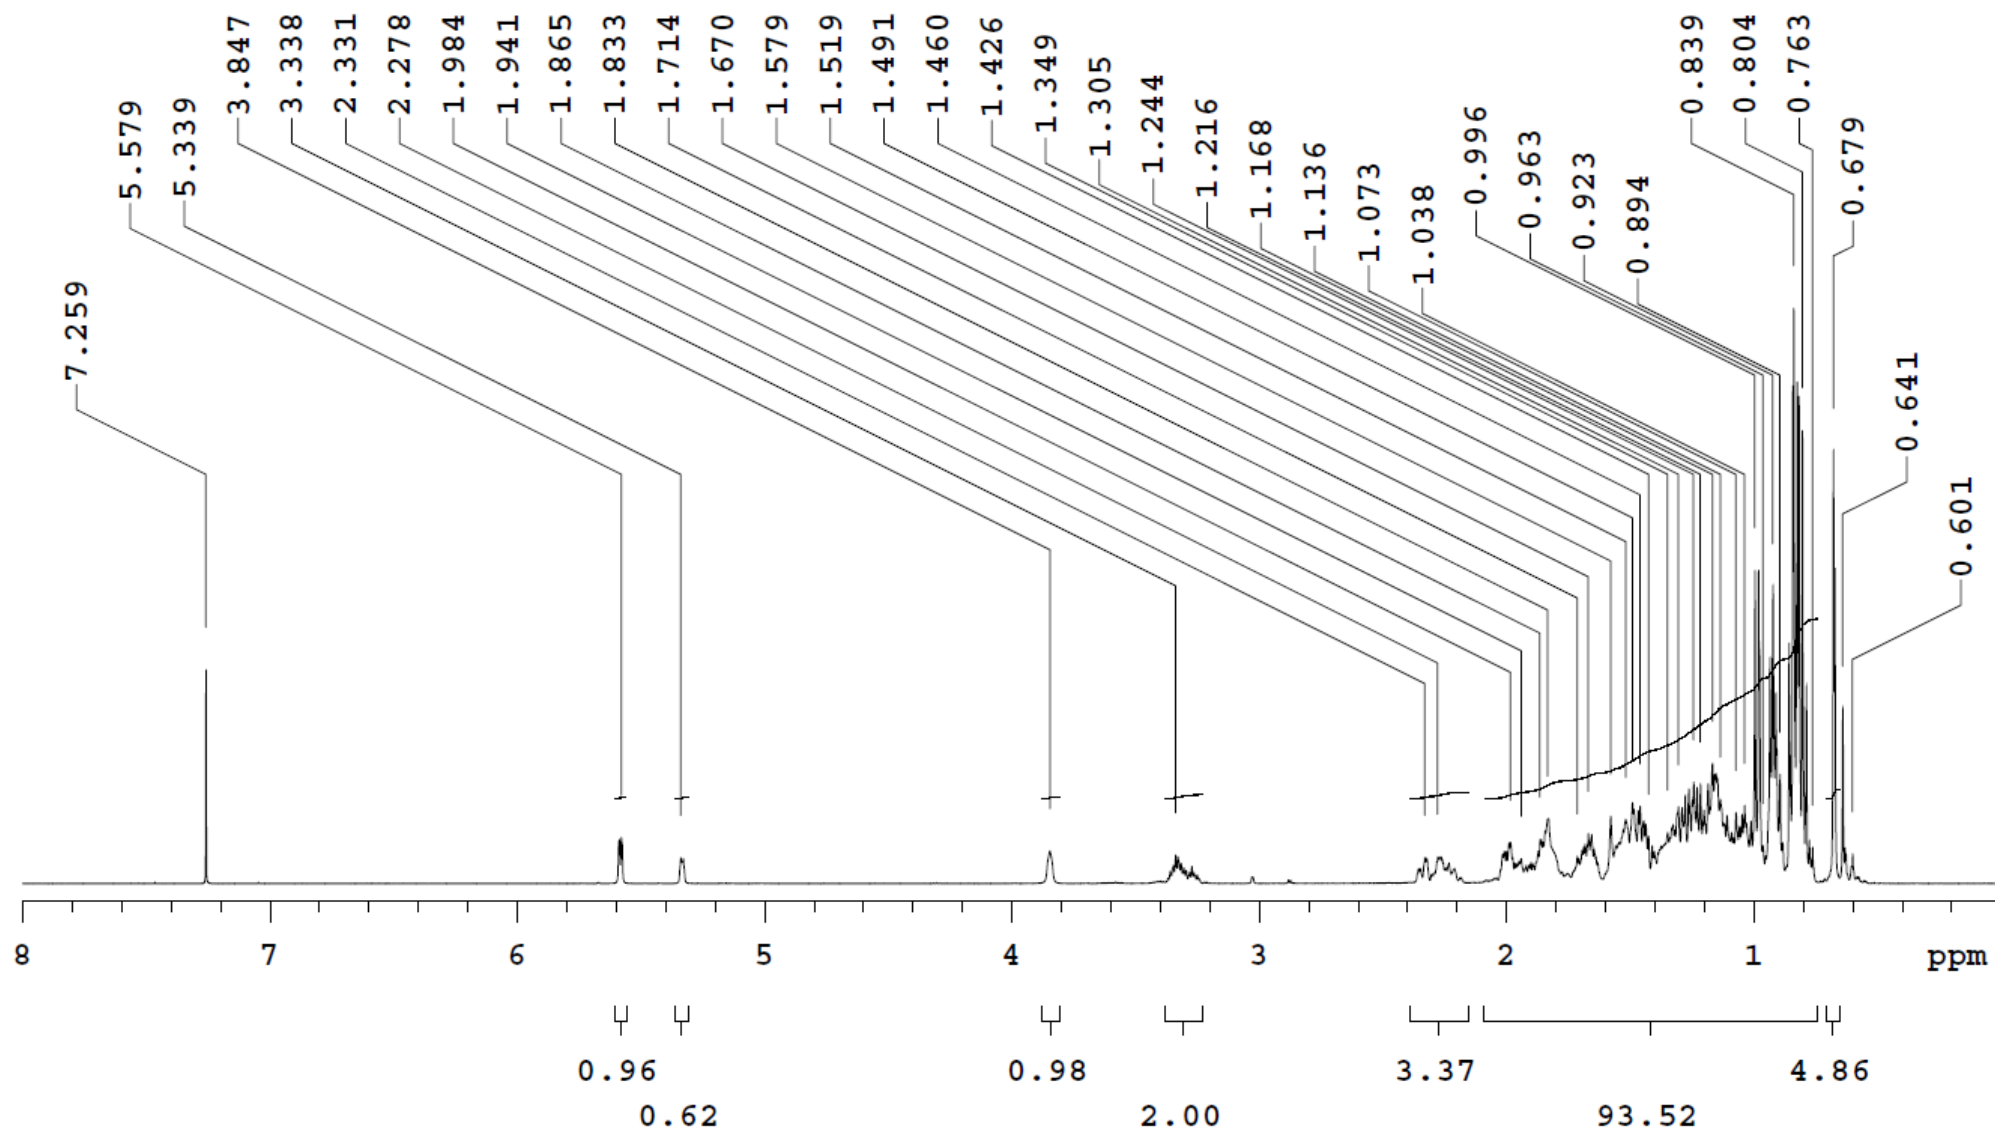

Figure S43. <sup>1</sup>H spectrum of sito-5-en-3 $\beta$ ,7 $\beta$ -diol-sitosterol ether (7 $\beta$ -hydroxysitosteryl-sitosterol ether) (**14**) in CDCl<sub>3</sub>.

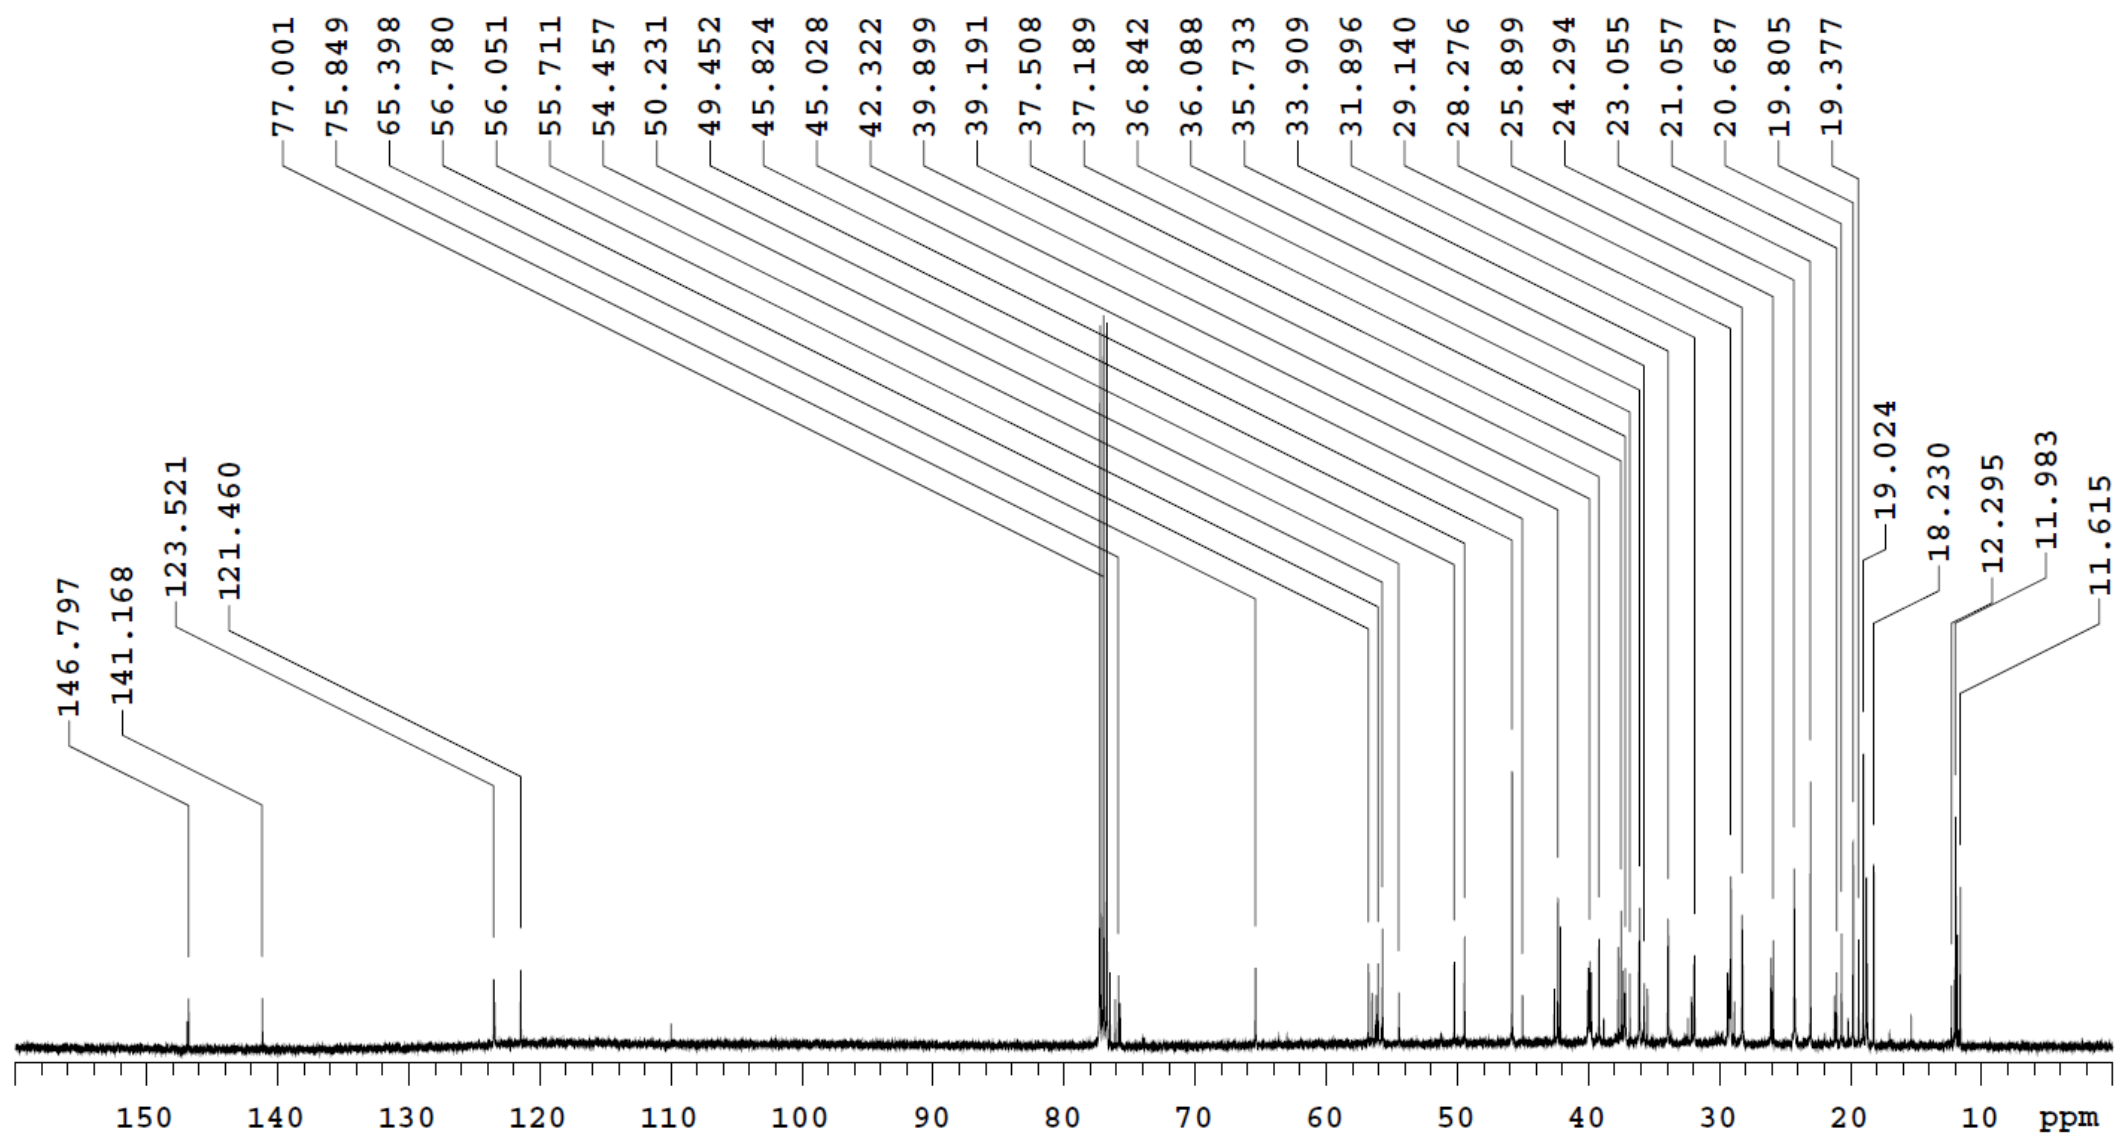

Figure S44. <sup>13</sup>C spectrum of sito-5-en-3 $\beta$ ,7 $\beta$ -diol-sitosterol ether (7 $\beta$ -hydroxysitosteryl-sitosterol ether) (**14**) in CDCl<sub>3</sub>.

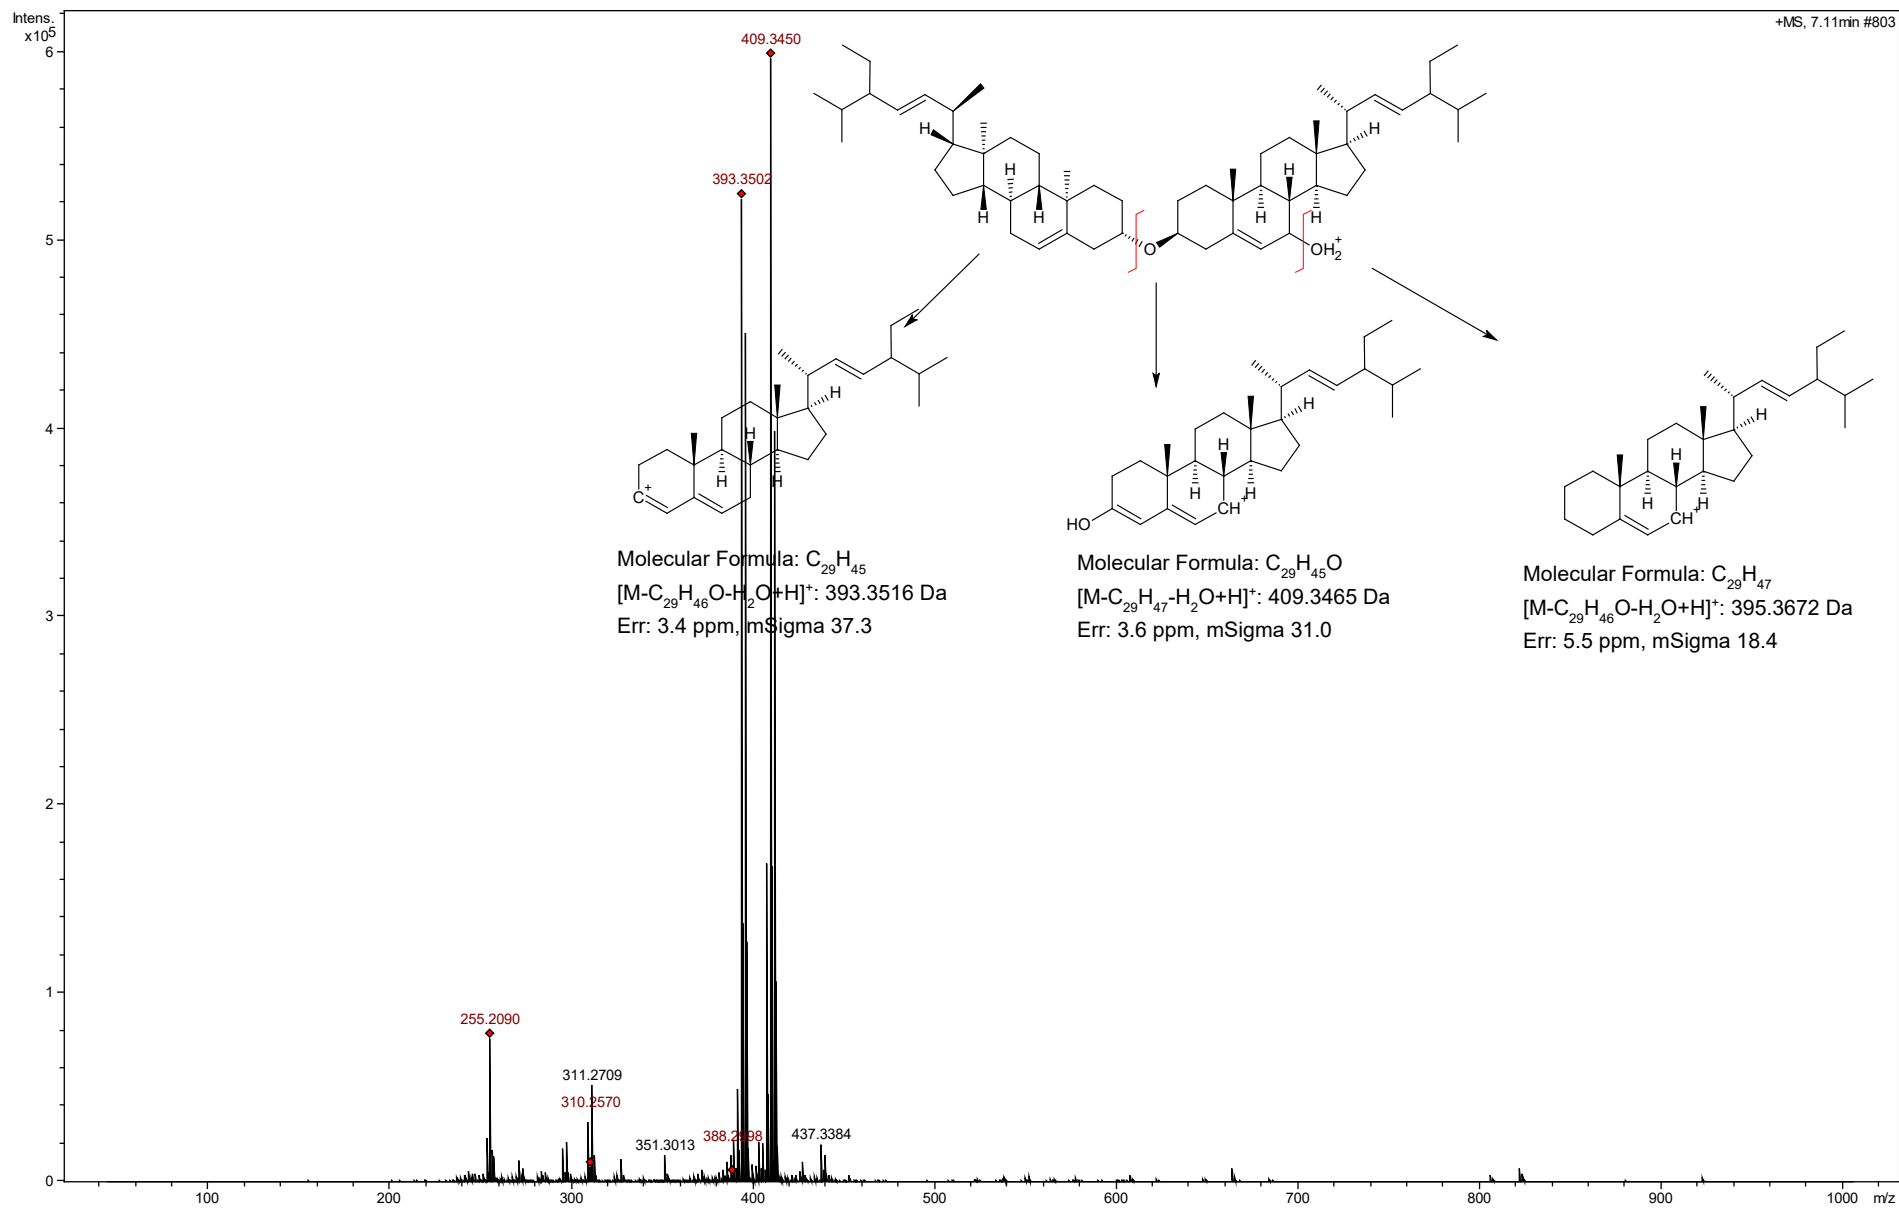

Figure S45. Mass spectrum of stigma-5-en-3 $\beta$ ,7 $\beta$ -diol-stigmasterol ether (7 $\beta$ -hydroxystigmasteryl-stigmasterol ether) (**15**).

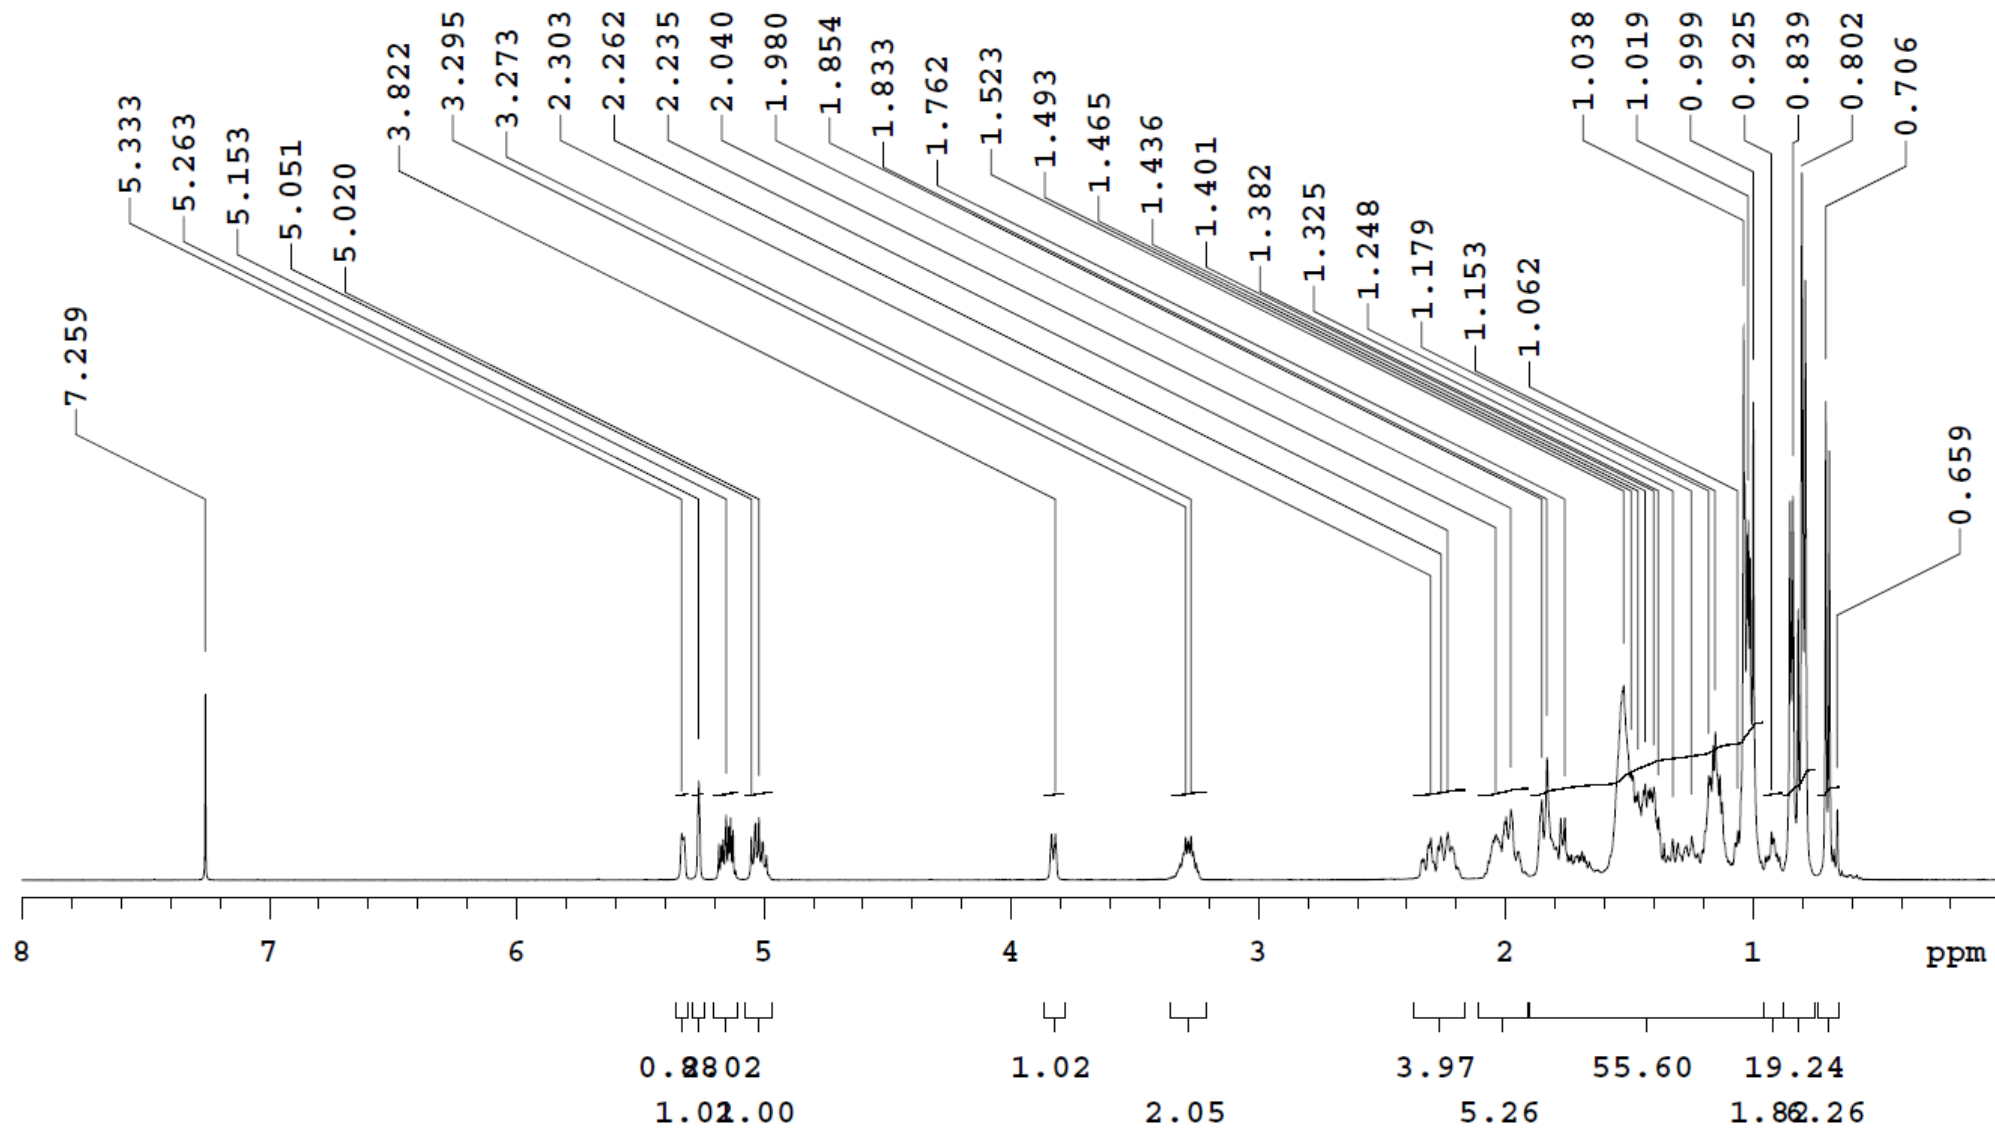

Figure S46. <sup>1</sup>H spectrum of stigma-5-en-3 $\beta$ ,7 $\beta$ -diol-stigmasterol ether (7 $\beta$ -hydroxystigmasteryl-stigmasterol ether) (**15**) in CDCl<sub>3</sub>.

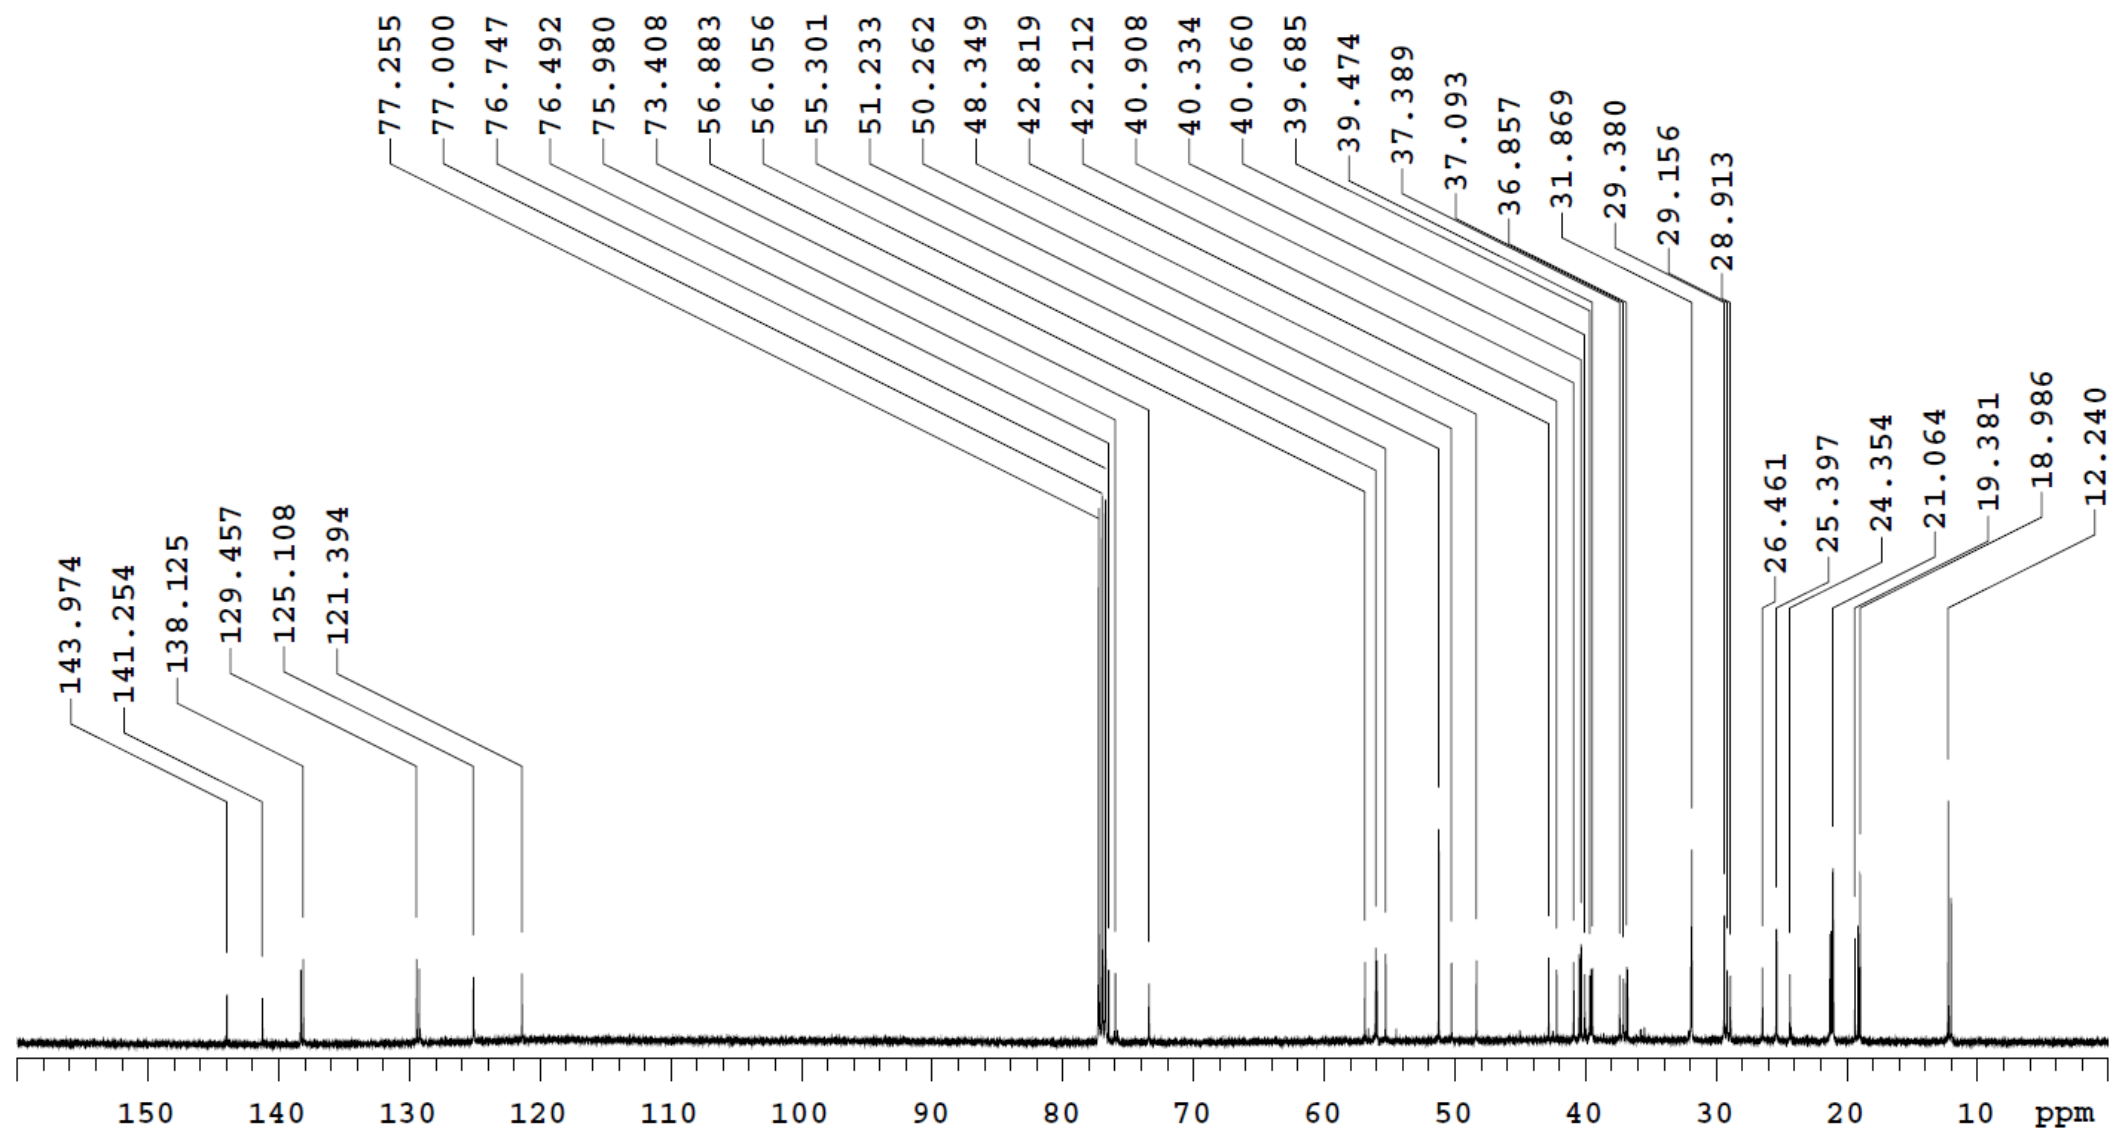

Figure S47. <sup>13</sup>C spectrum of stigma-5-en-3 $\beta$ ,7 $\beta$ -diol-stigmasterol ether (7 $\beta$ -hydroxystigmasteryl-stigmasterol ether) (**15**) in CDCl<sub>3</sub>.

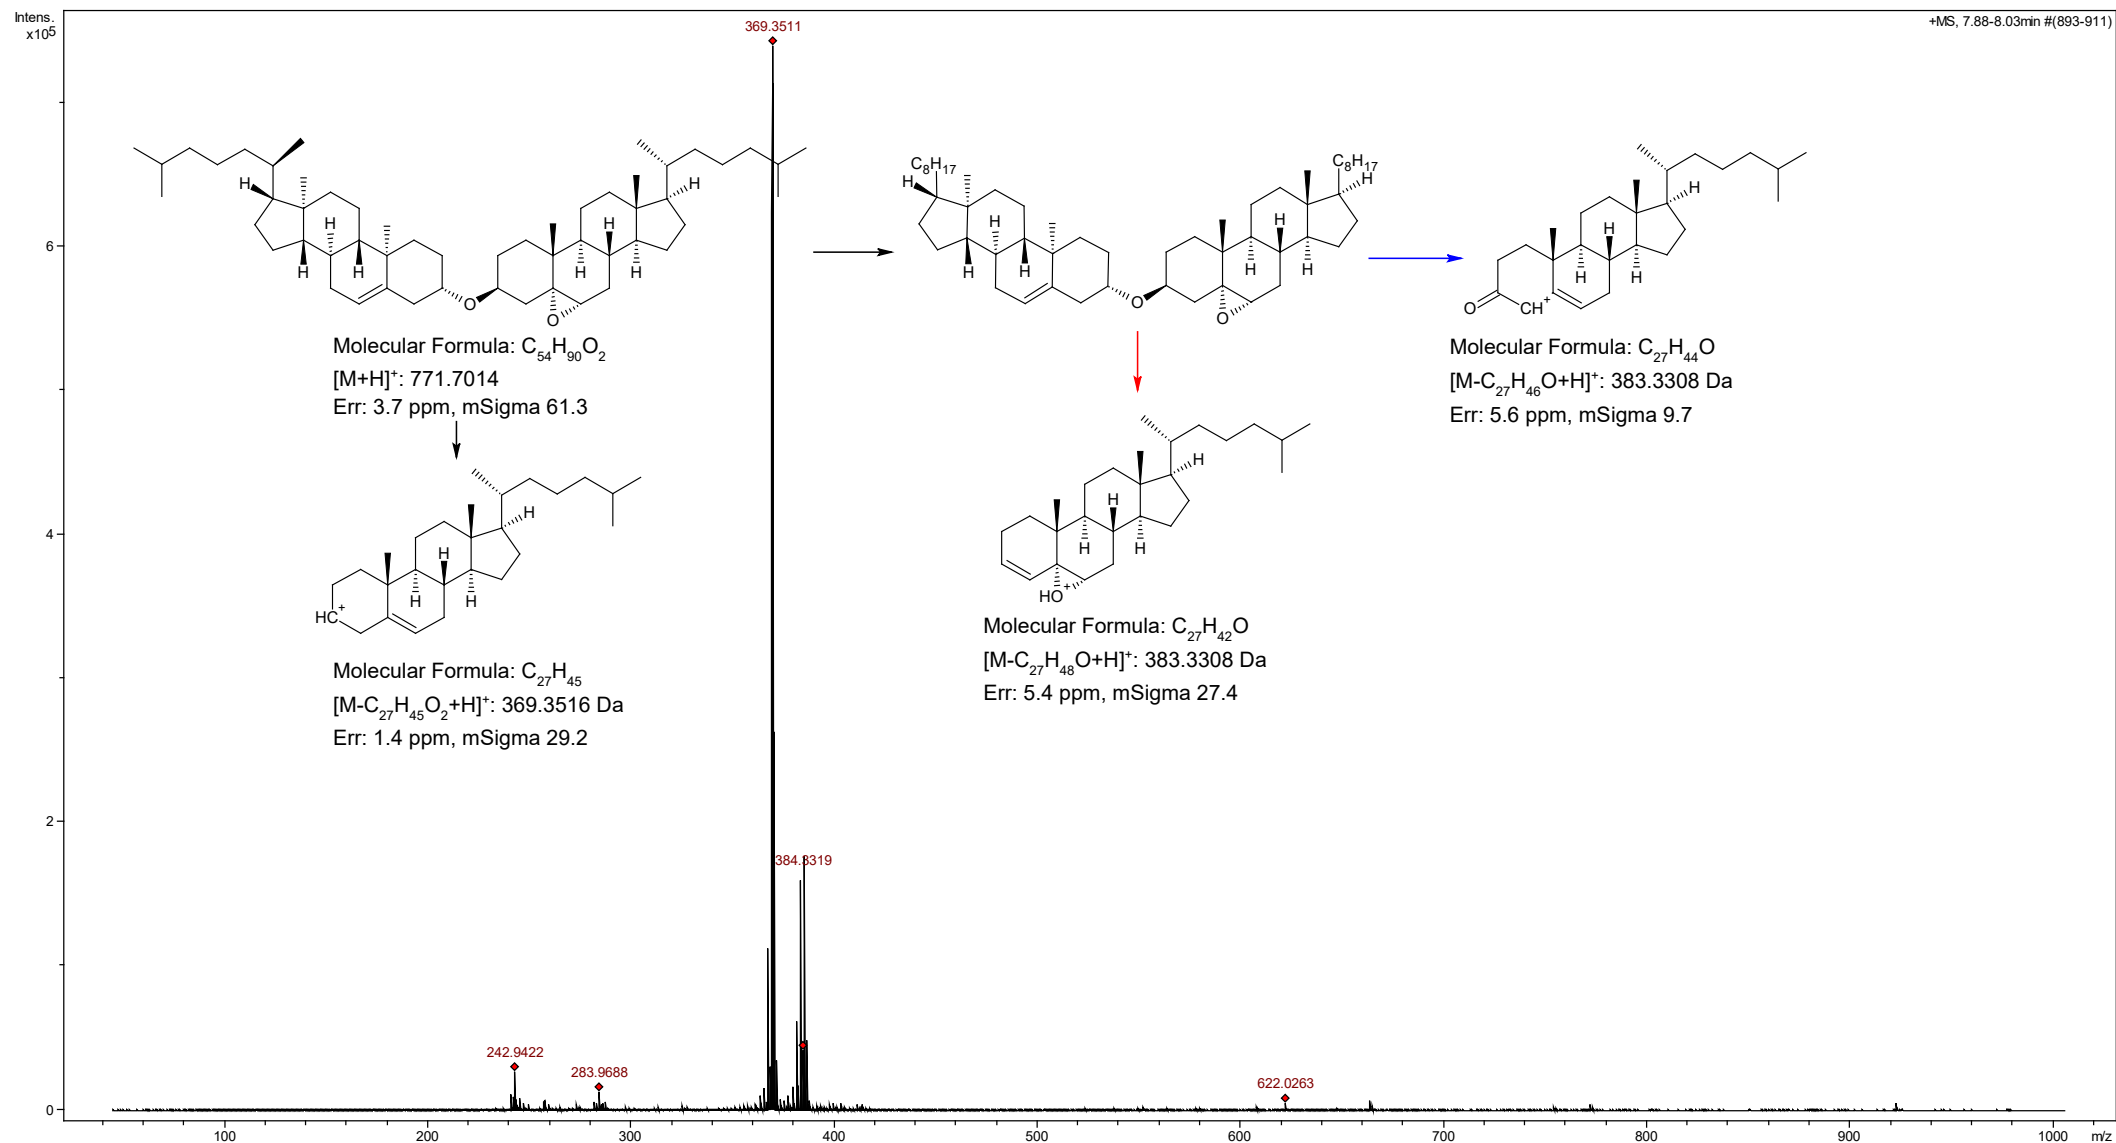

Figure S48. Mass spectrum of (5,6α-epoxycholesteryl)-cholesterol ether (**16**).

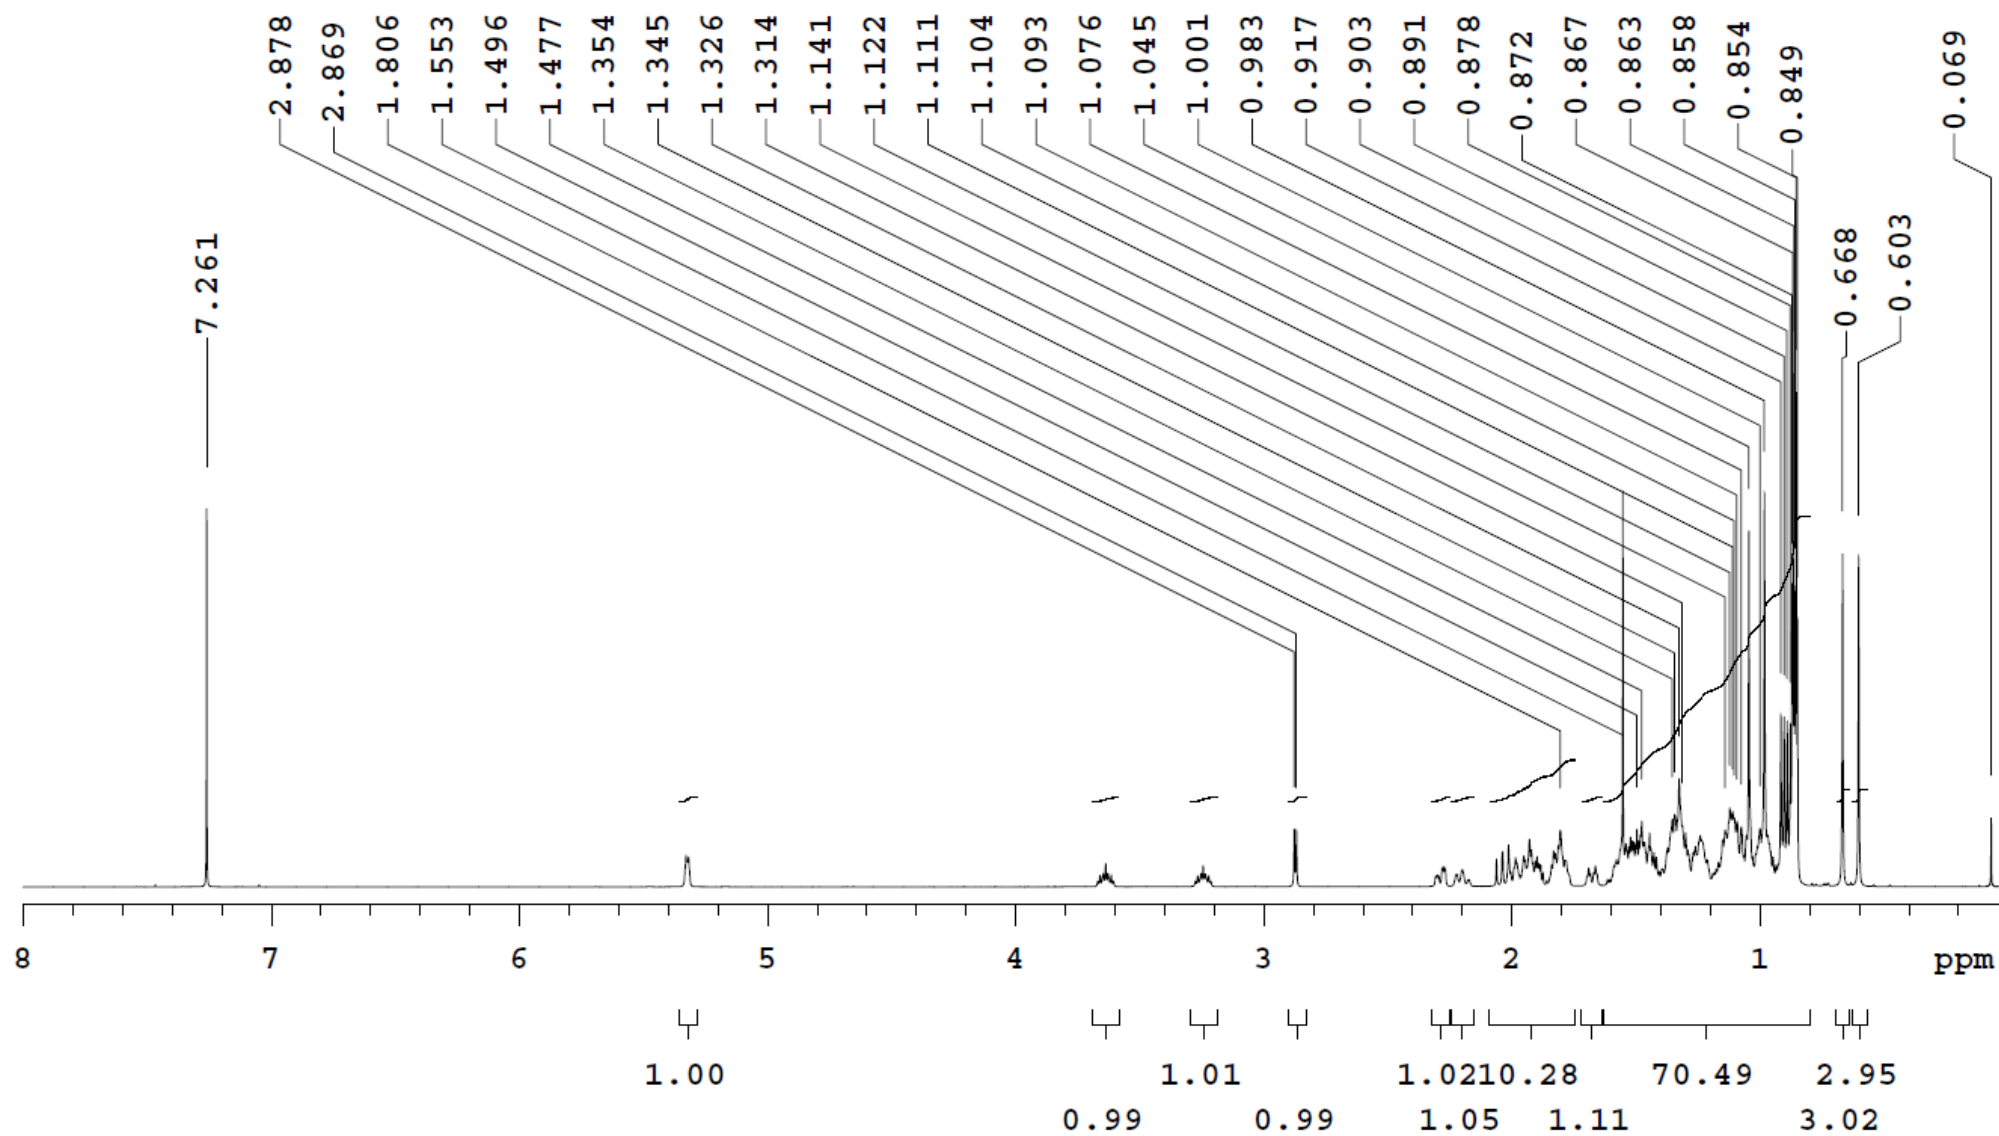

Figure S49. <sup>1</sup>H spectrum of (5,6α-epoxycholesteryl)-cholesterol ether (**16**) in CDCl<sub>3</sub>.

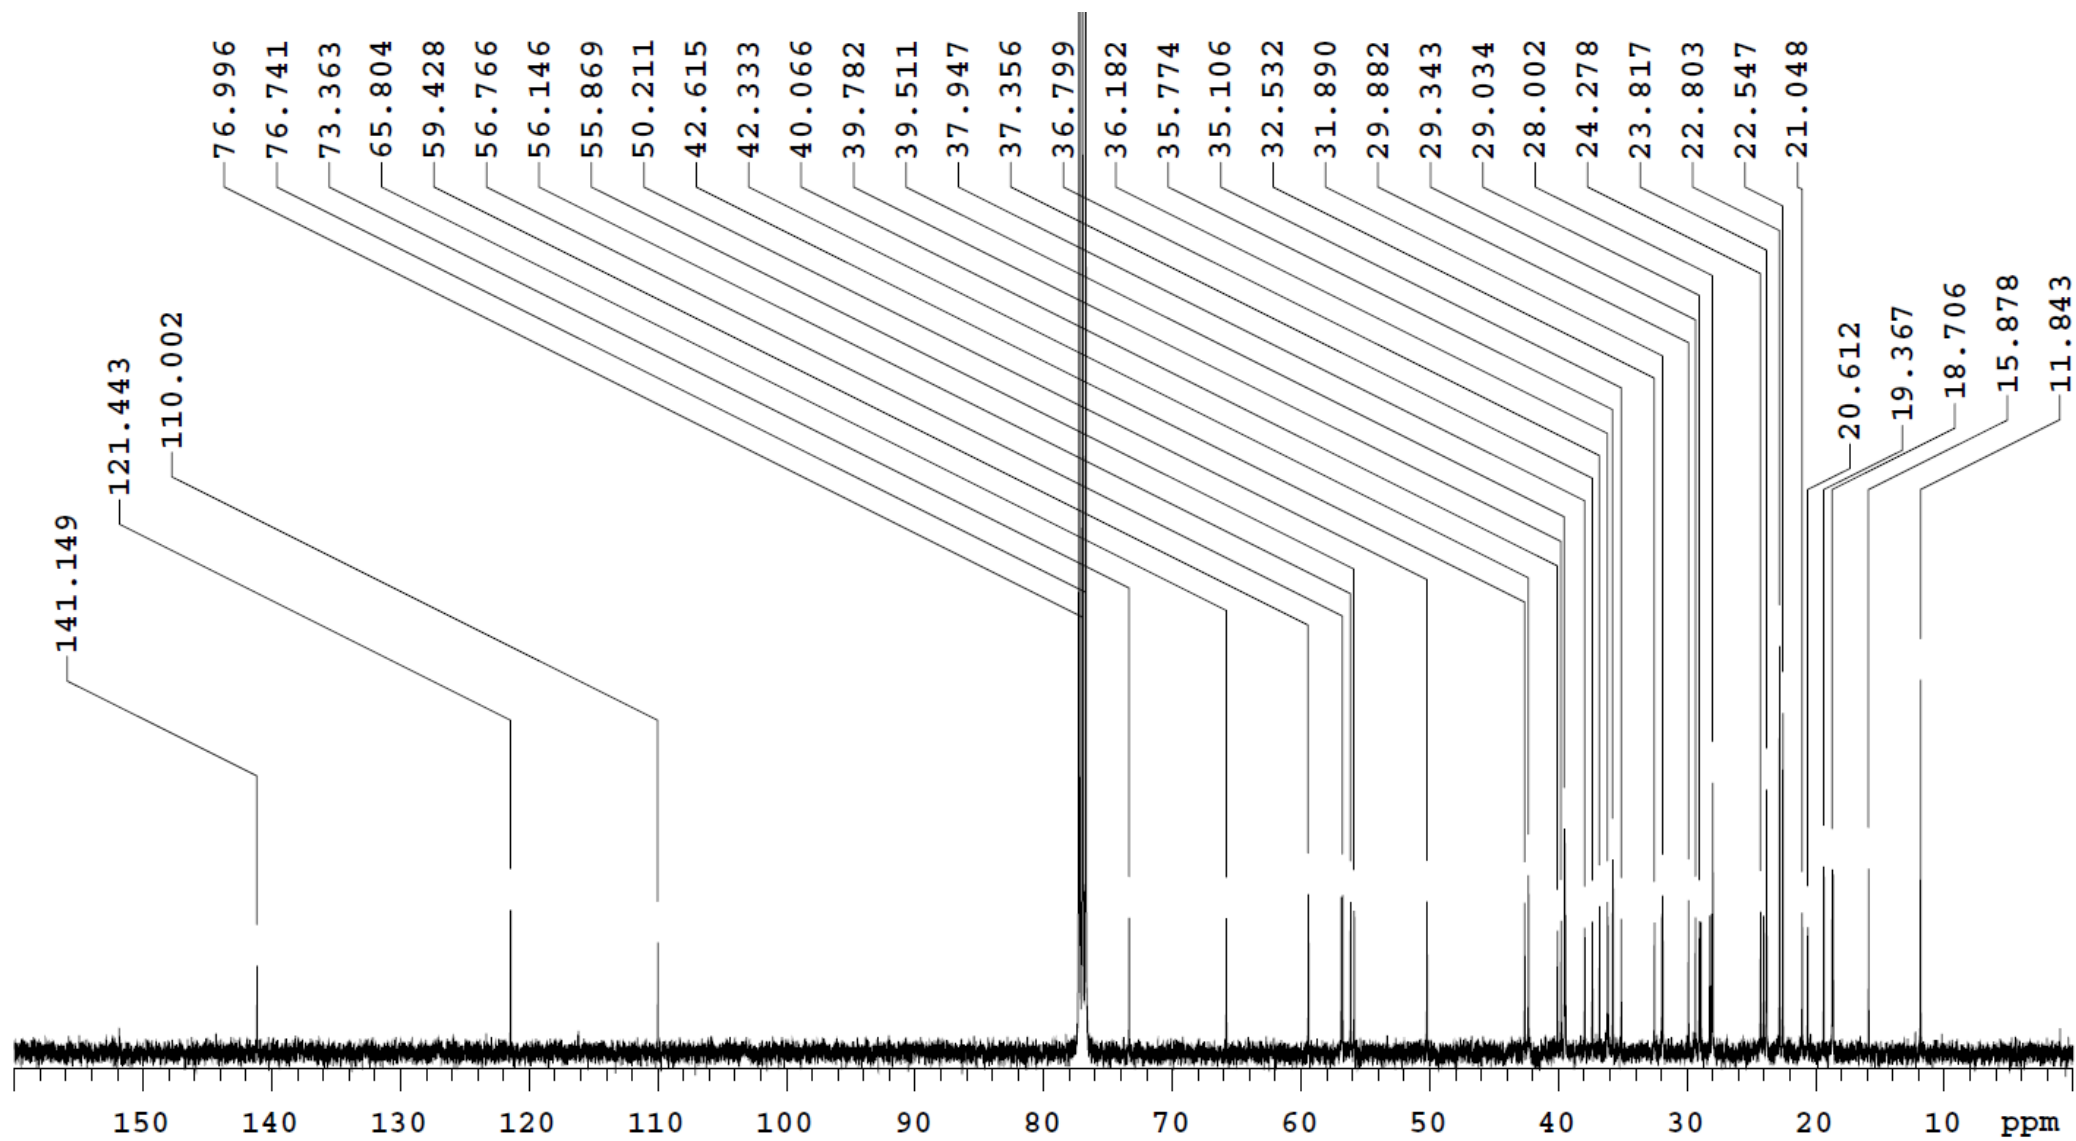

Figure S50. <sup>13</sup>C spectrum of (5,6 $\alpha$ -epoxycholesteryl)-cholesterol ether (**16**) in CDCl<sub>3</sub>.

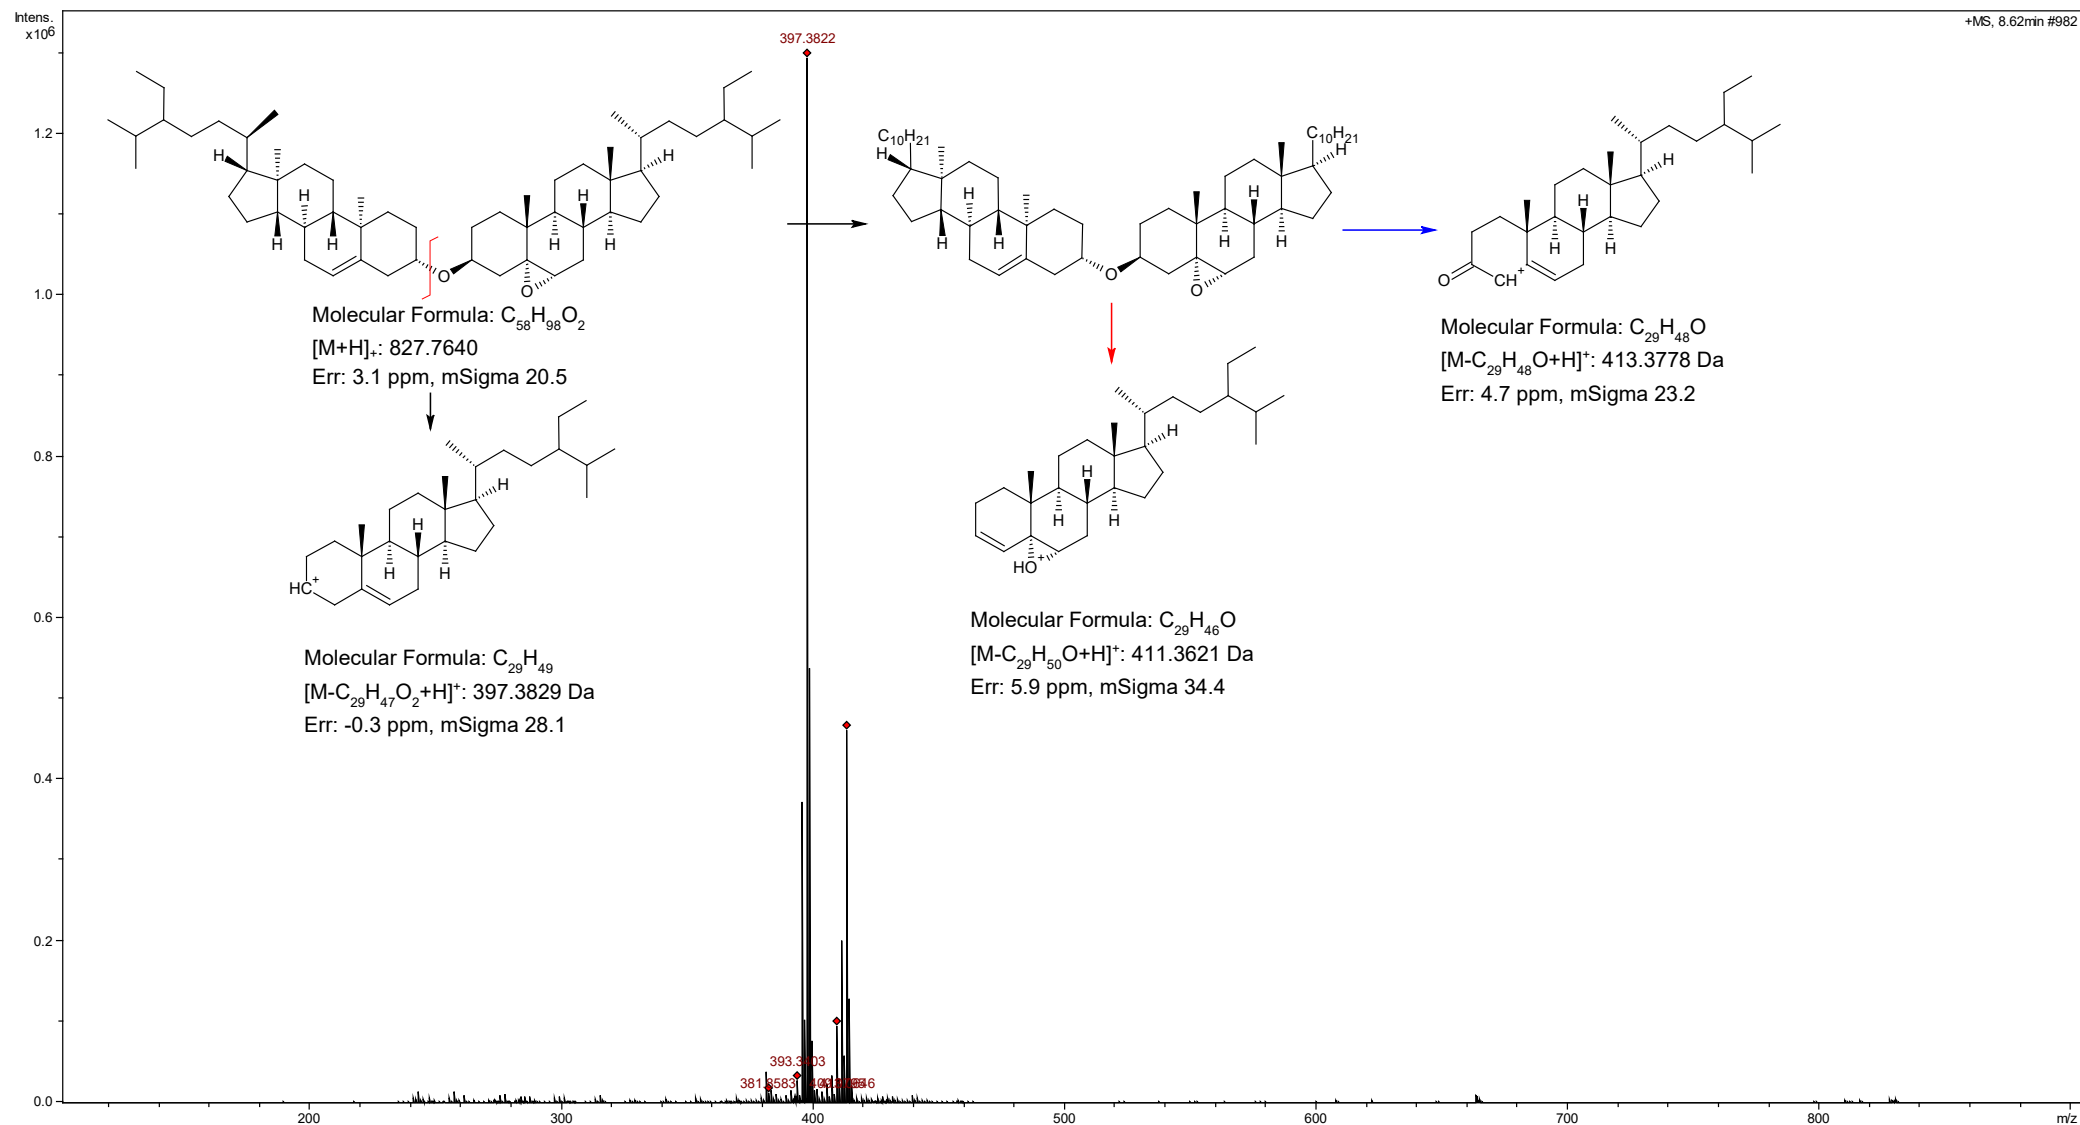

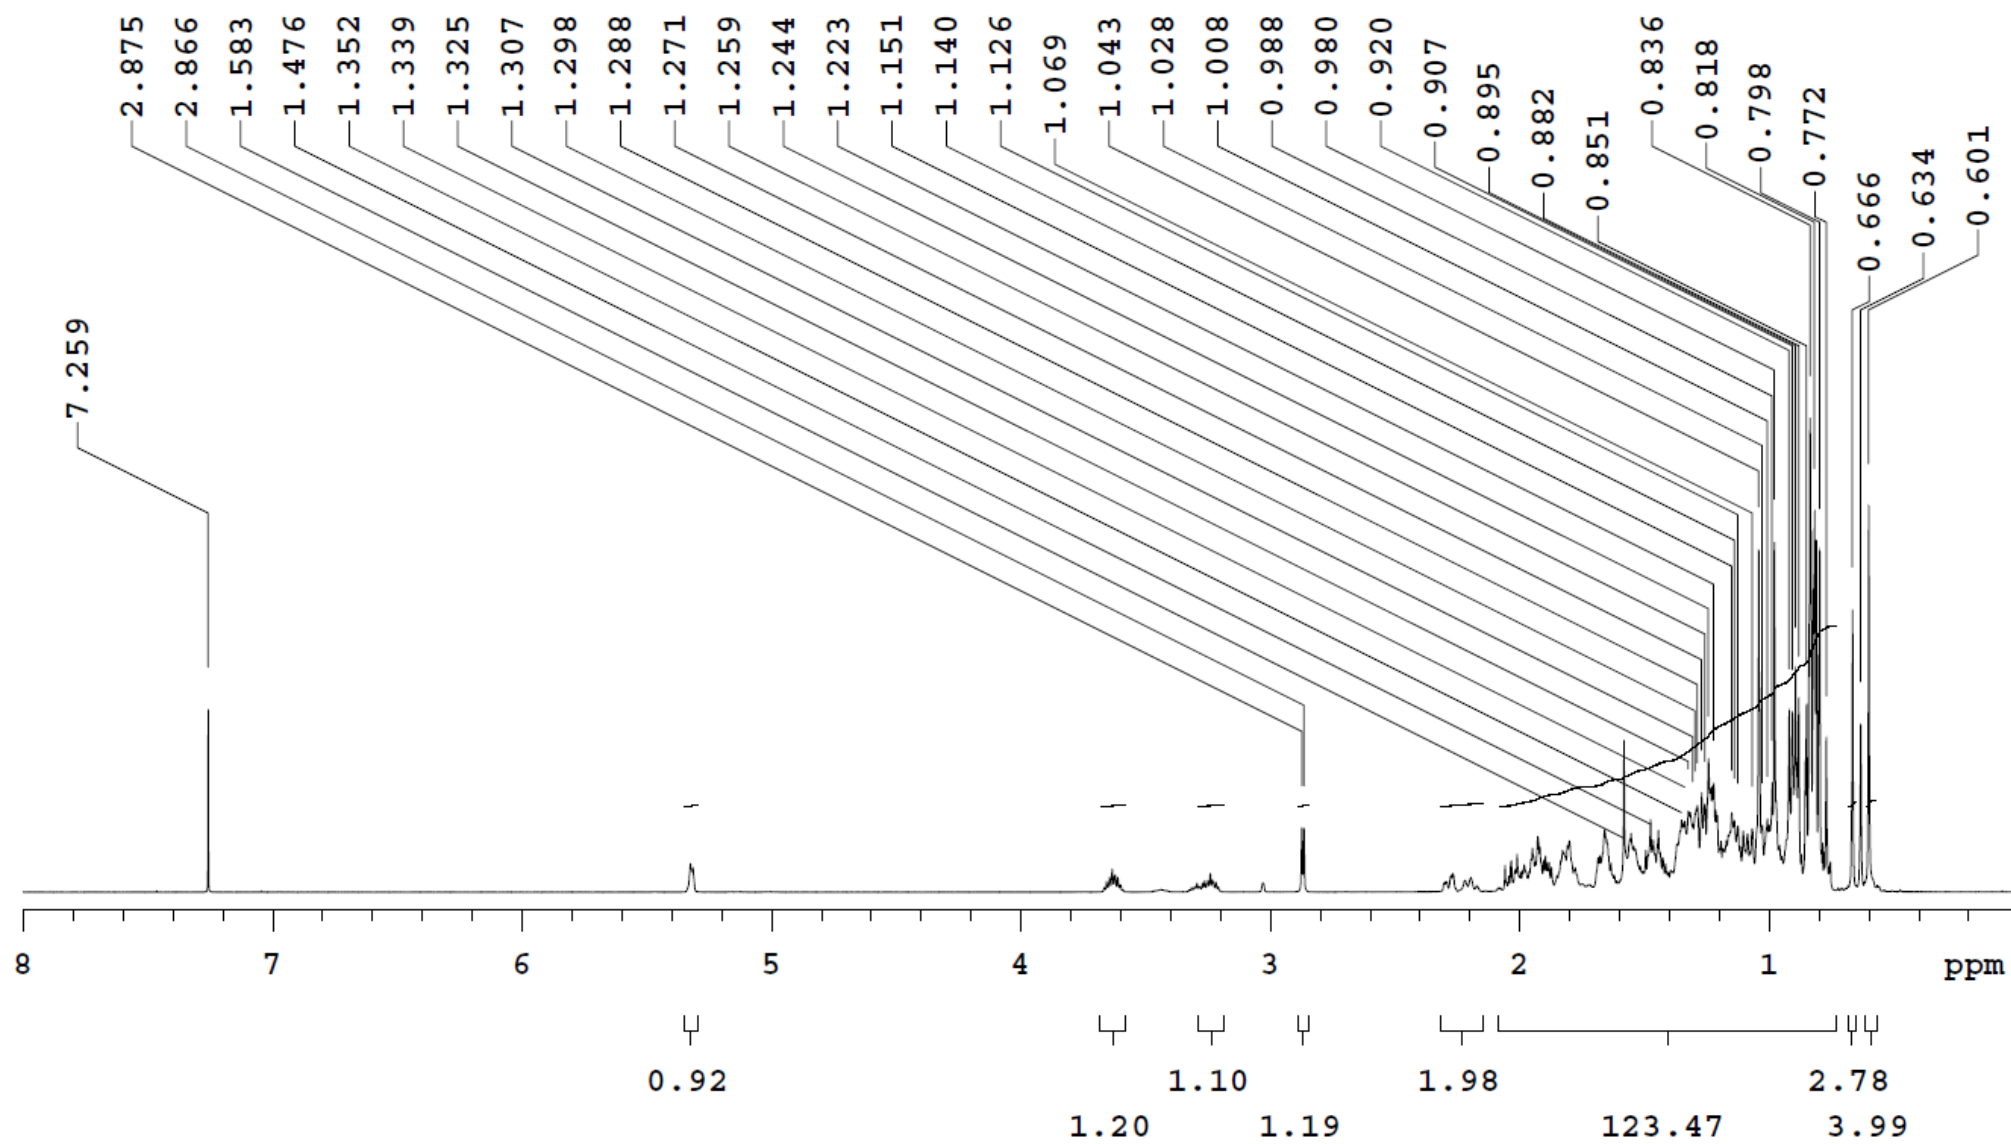

Figure S52. <sup>1</sup>H spectrum of (5,6α-epoxysitosteryl)-sitosterol ether (**17**) in CDCl<sub>3</sub>.

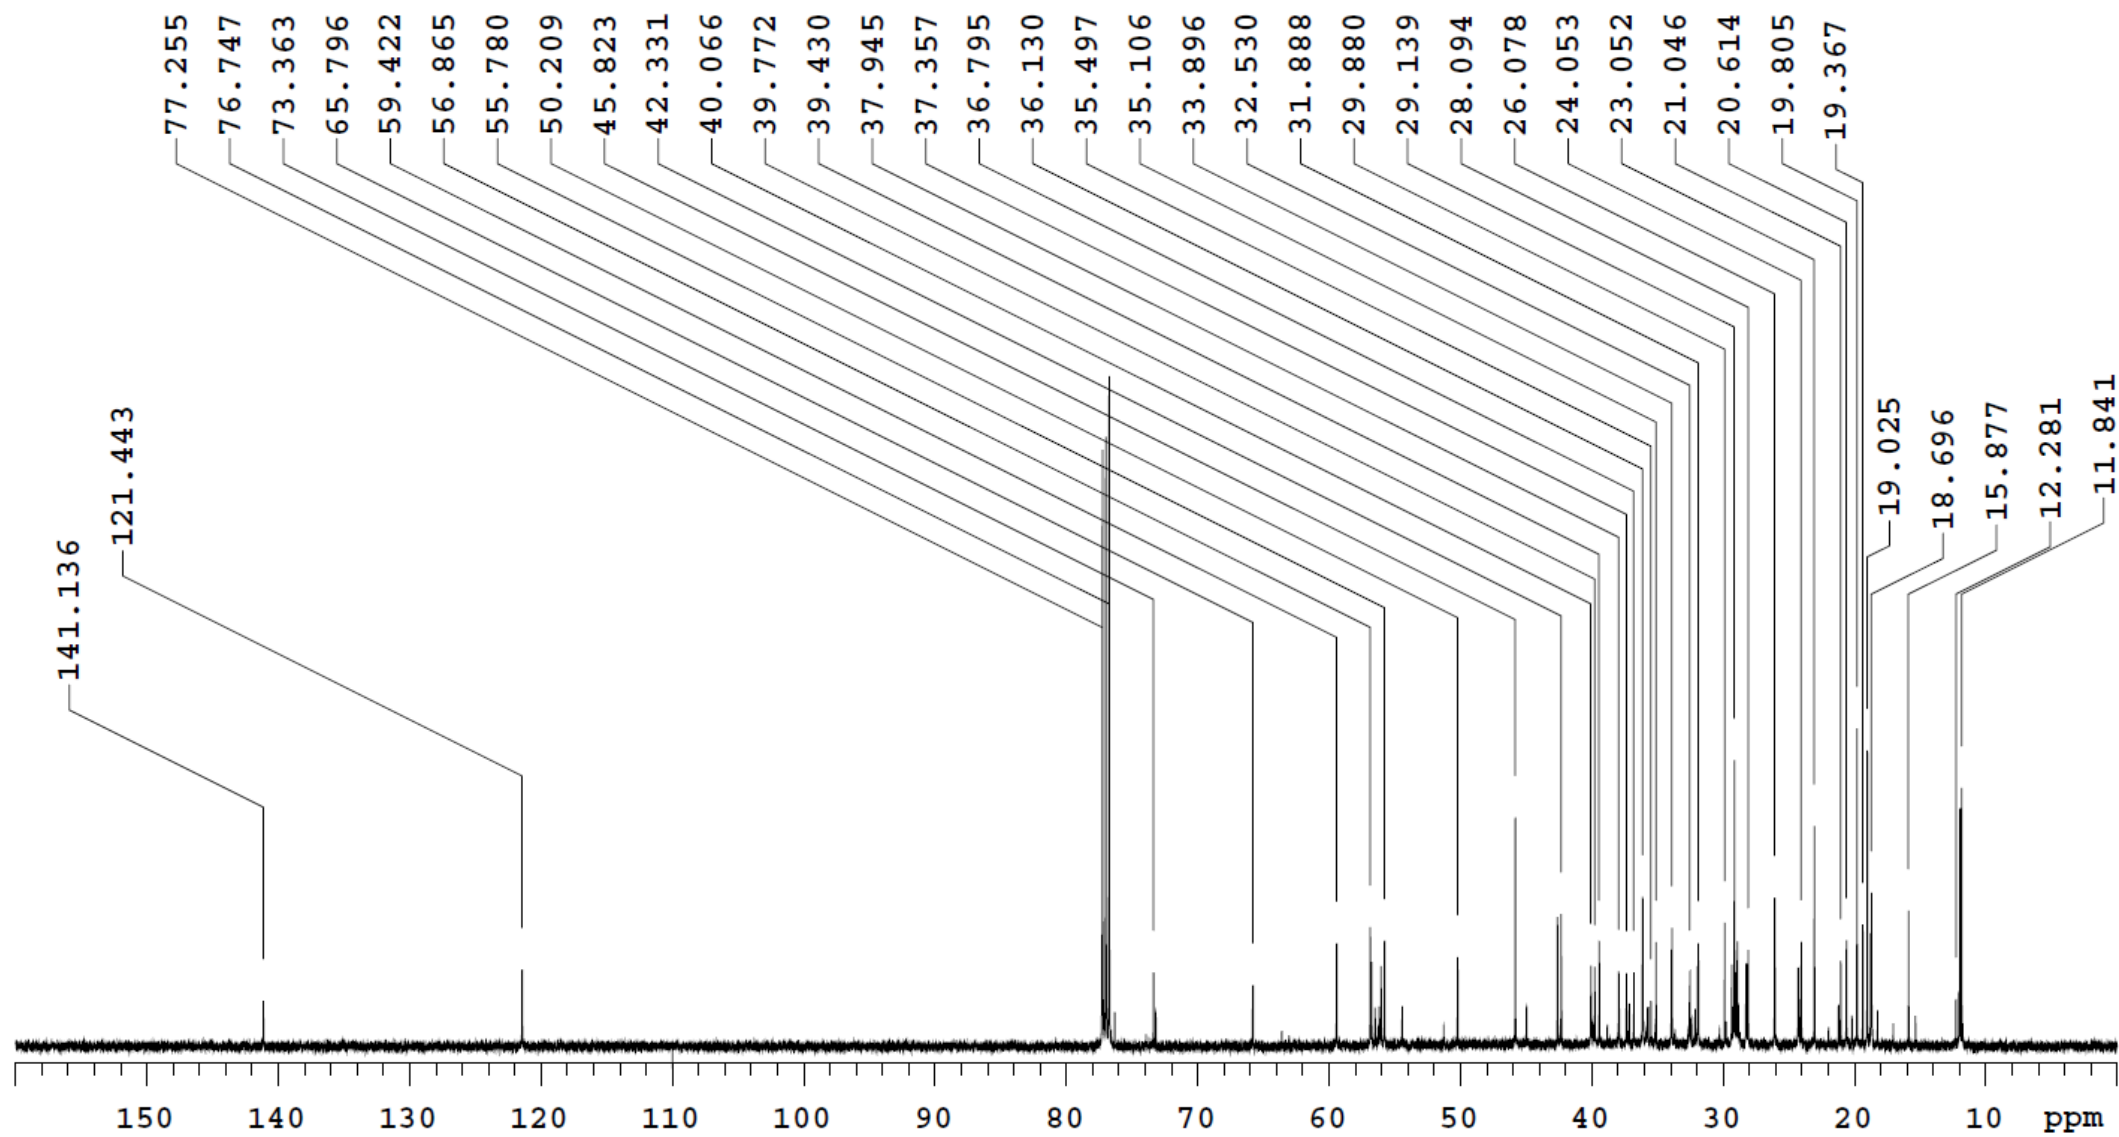

Figure S53. <sup>13</sup>C spectrum of (5,6α-epoxysitosteryl)-sitosterol ether (**17**) in CDCl<sub>3</sub>.

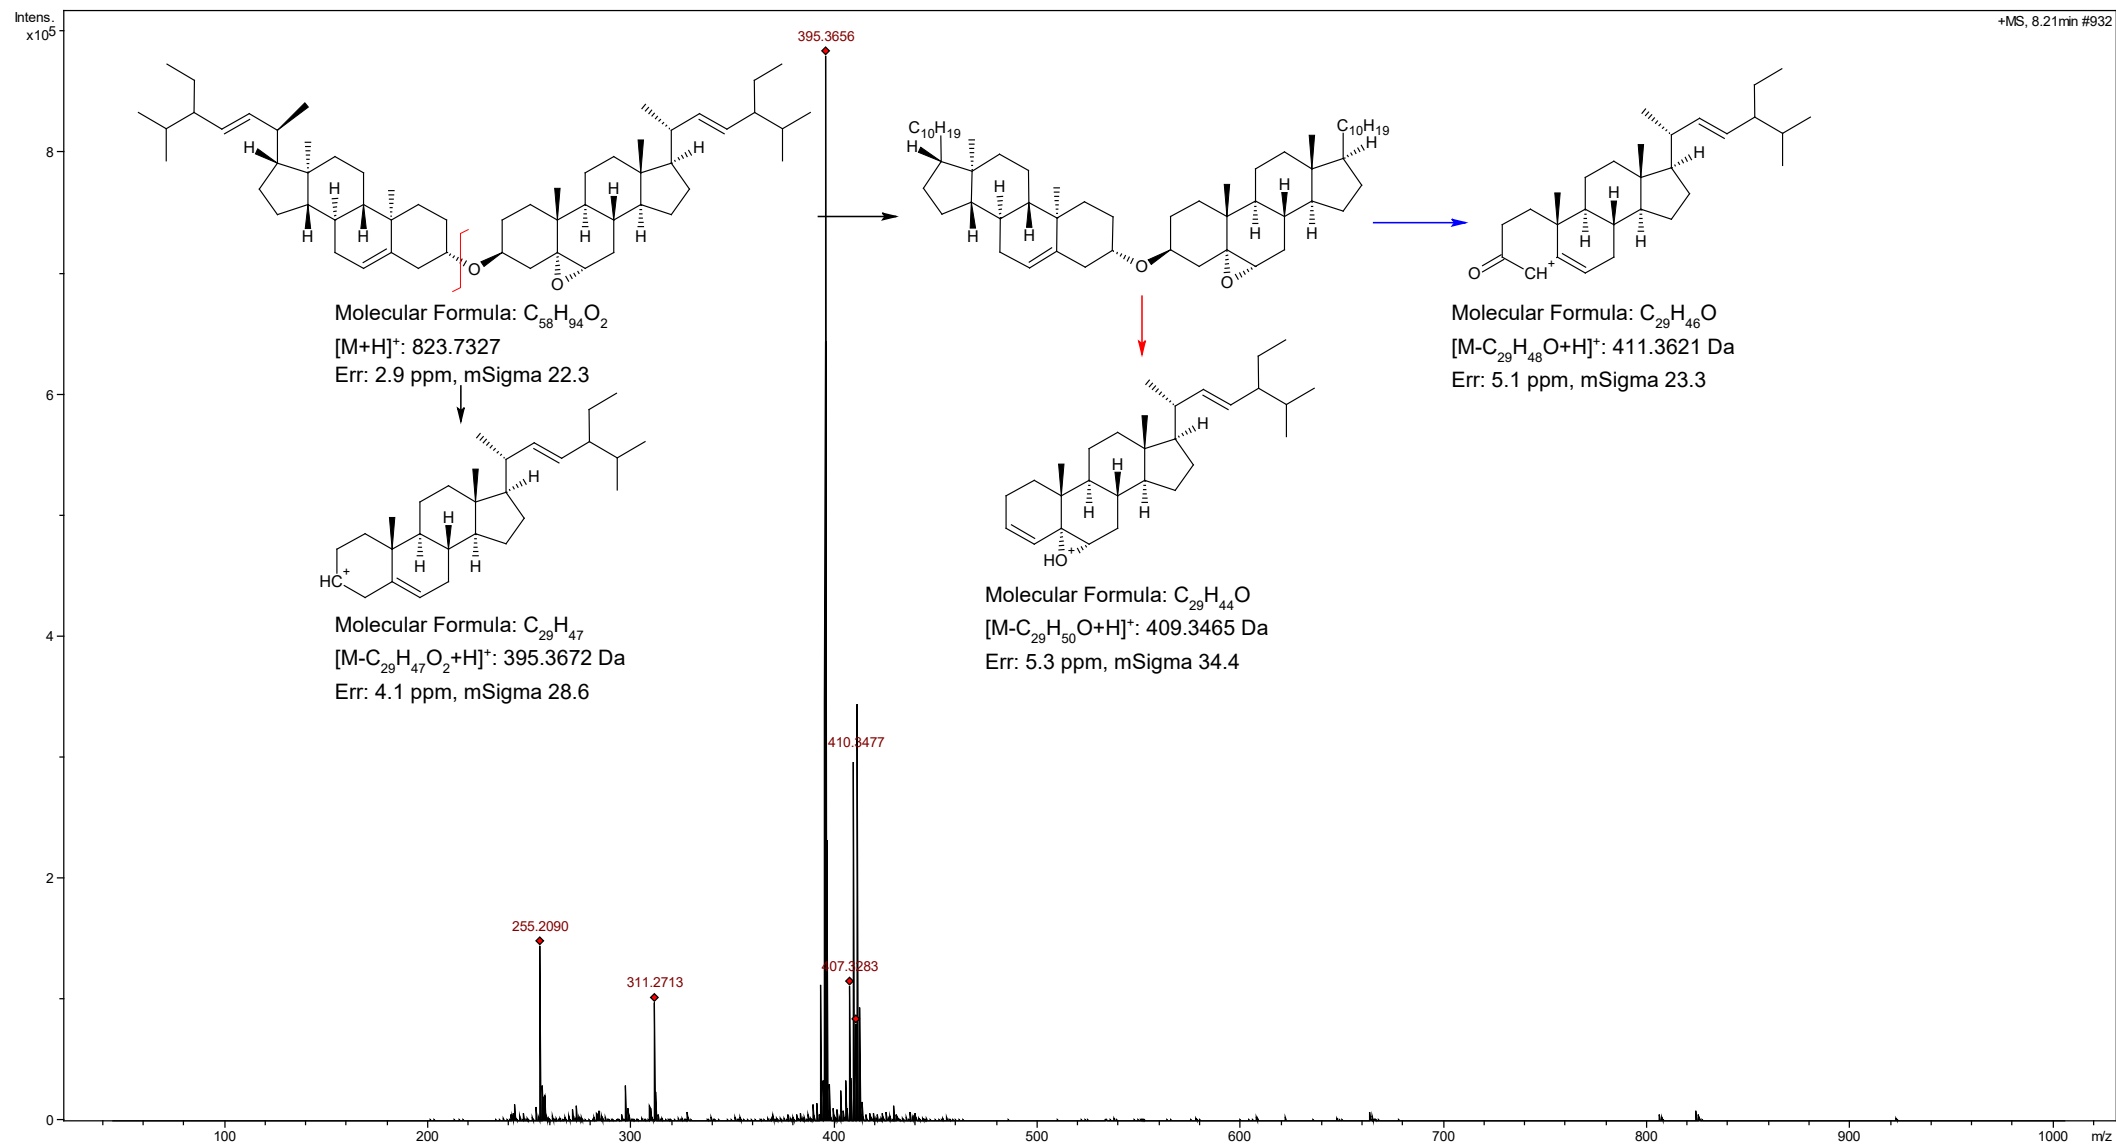

Figure S54. Mass spectrum of (5,6 $\alpha$ -epoxystigmasteryl)-stigmasteryl ether (**18**).

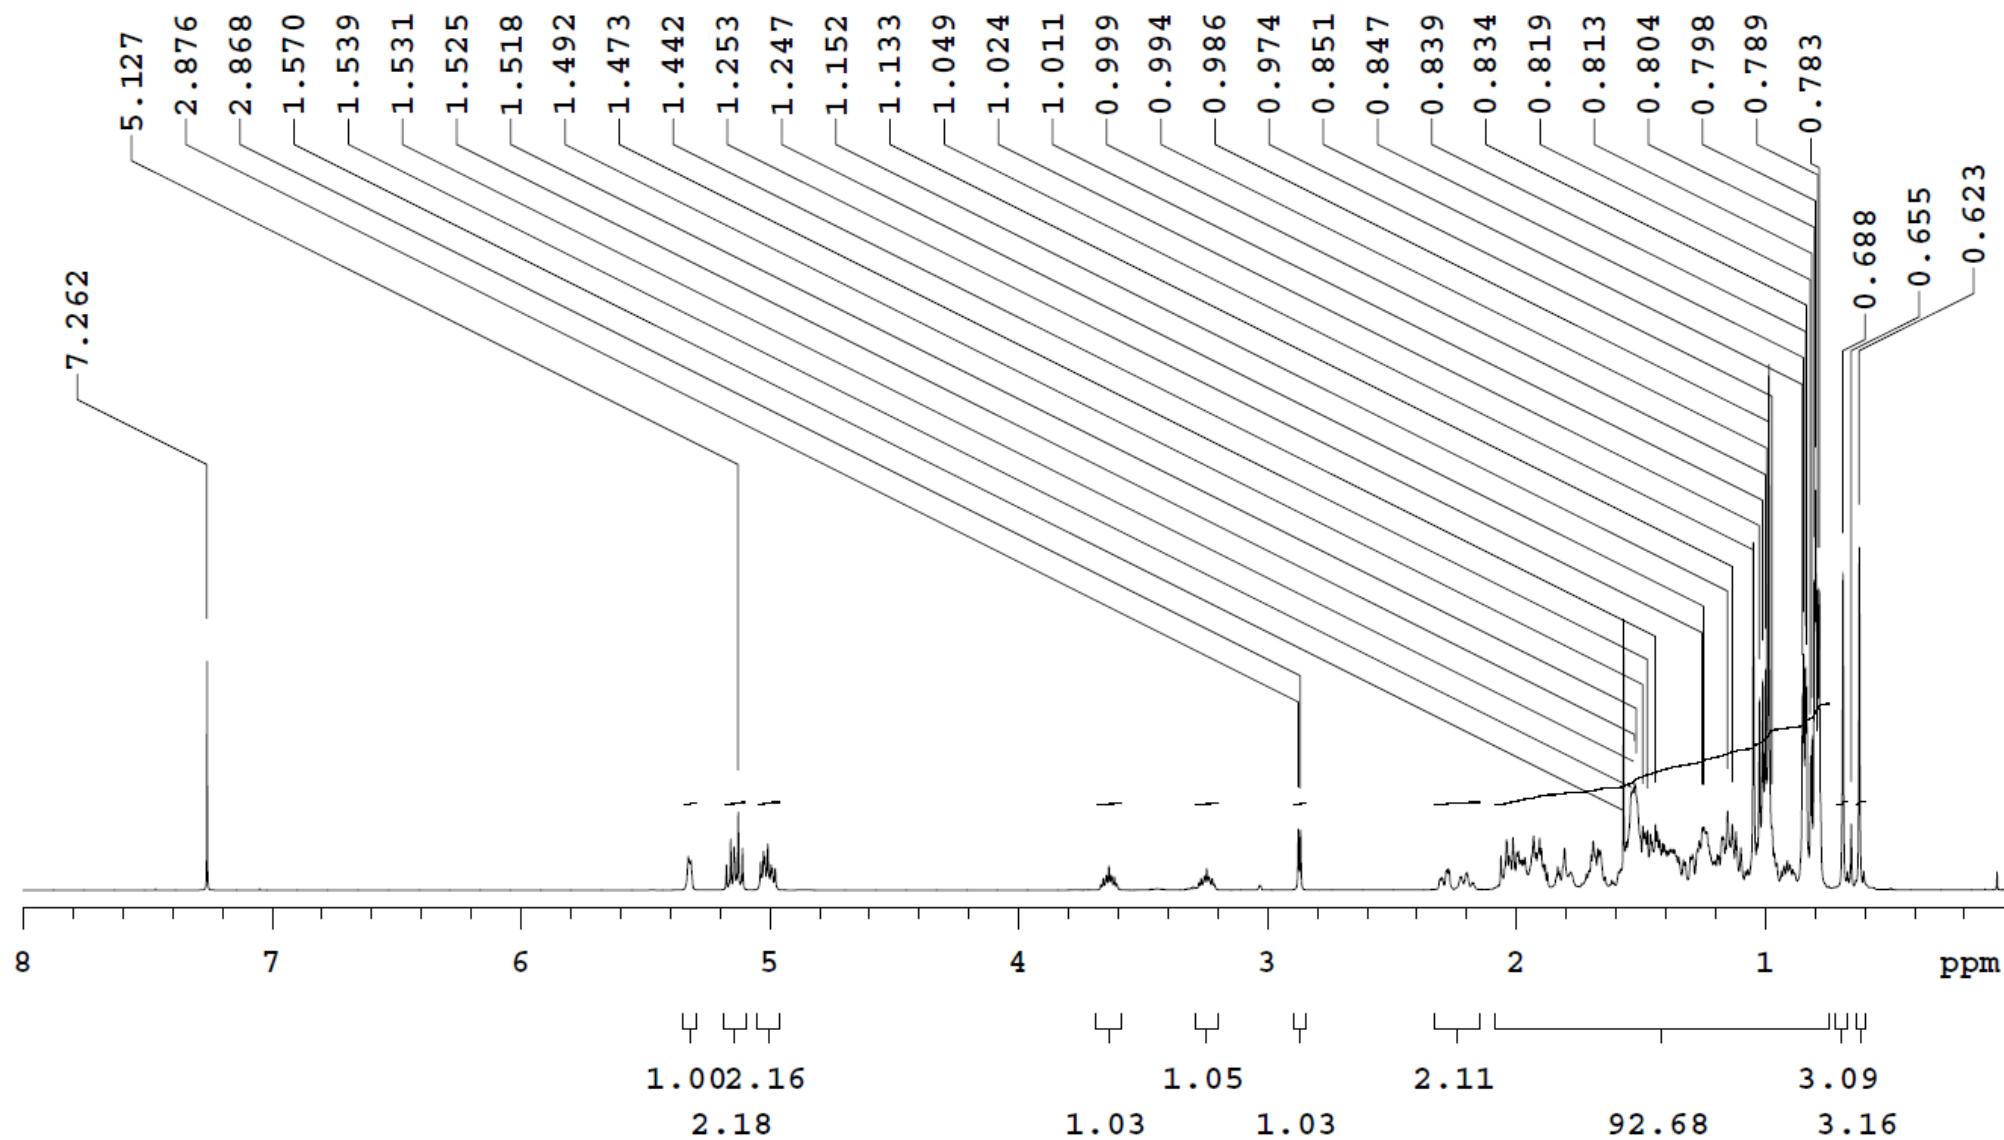

Figure S55. <sup>1</sup>H spectrum of (5,6α-epoxysitgmasteryl)-stigmasterol ether (**18**) in CDCl<sub>3</sub>.

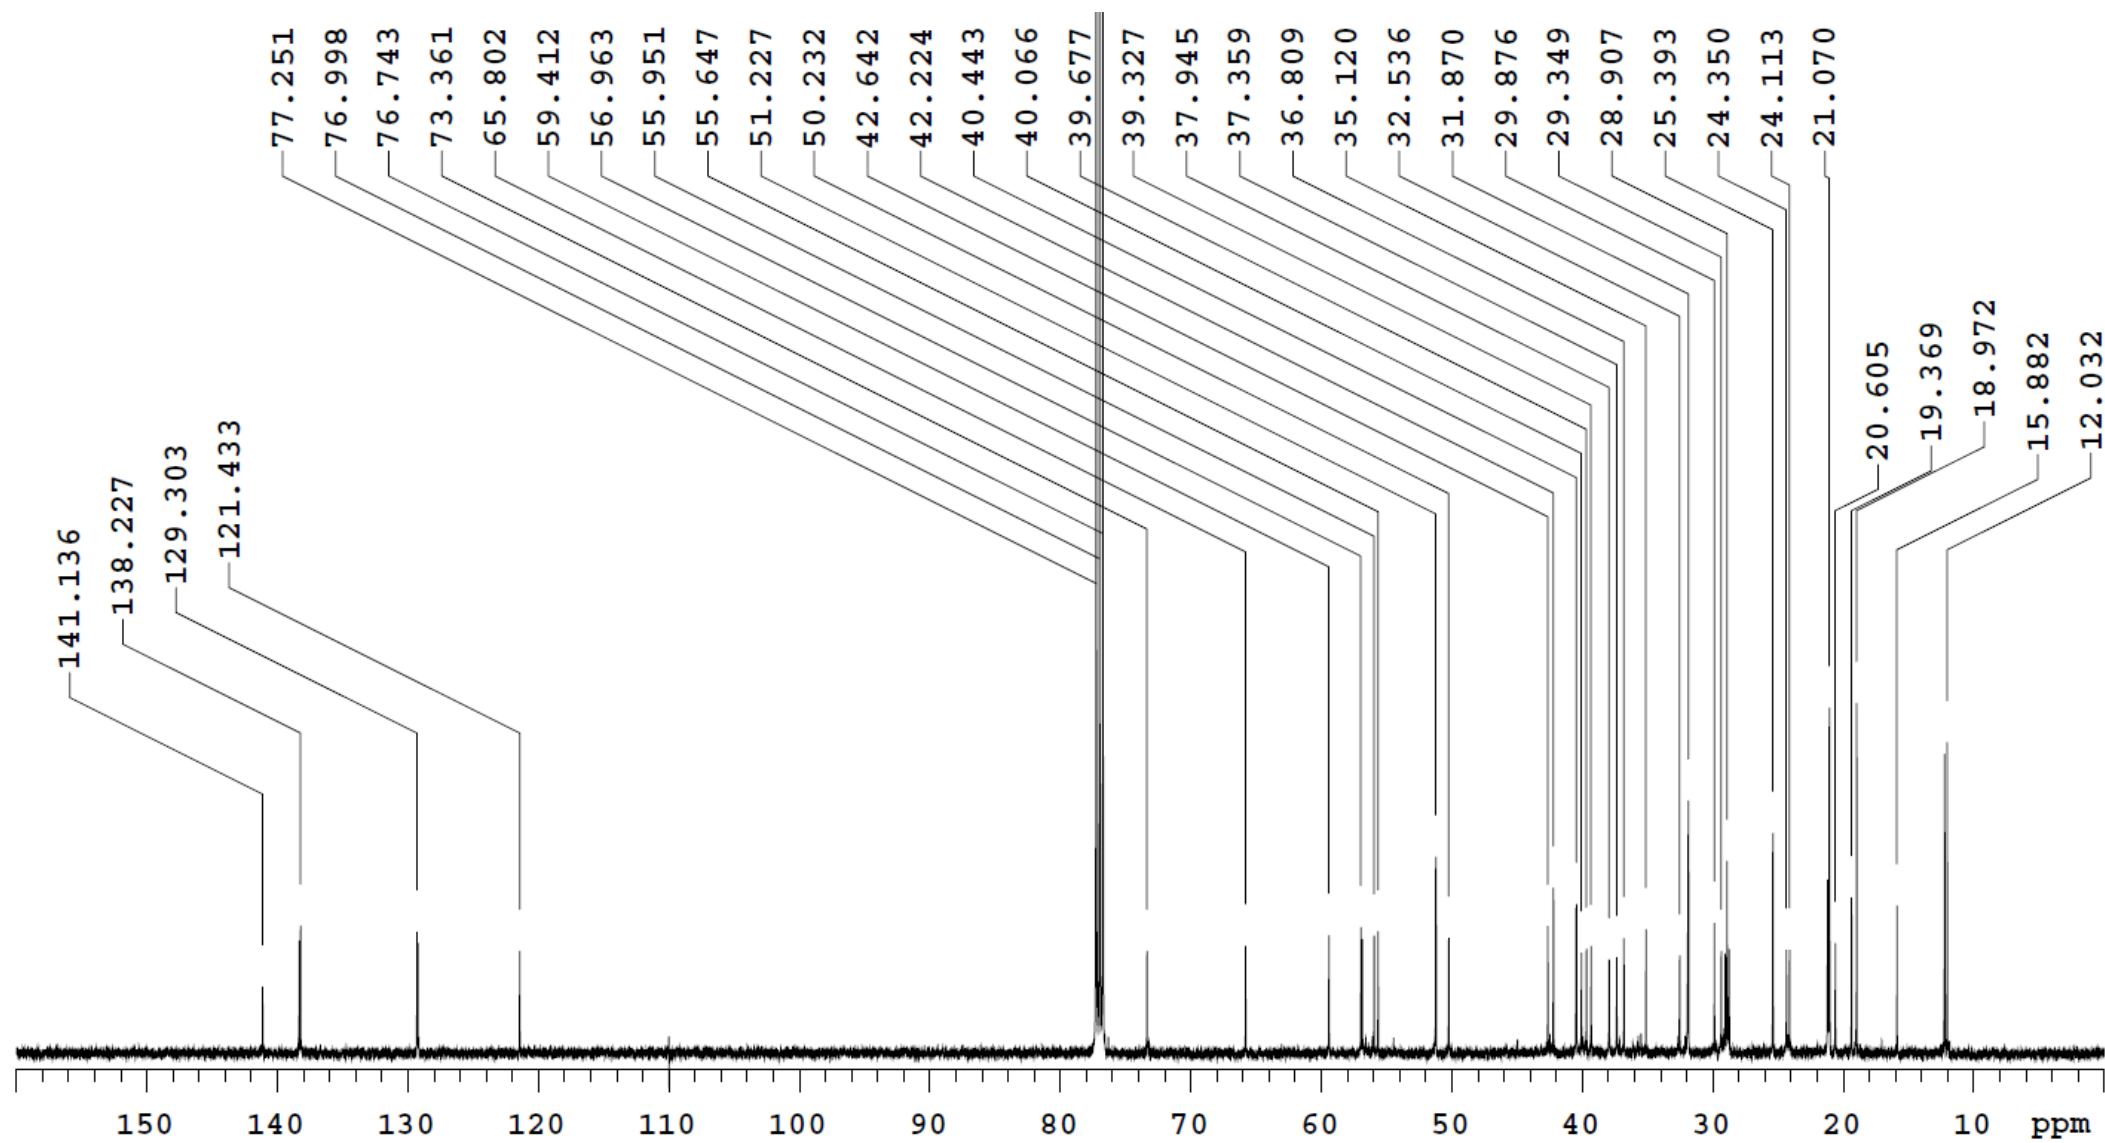

Figure S56.  $^{13}\text{C}$  spectrum of (5,6 $\alpha$ -epoxysitgmasteryl)-stigmasterol ether (**18**) in  $\text{CDCl}_3$ .

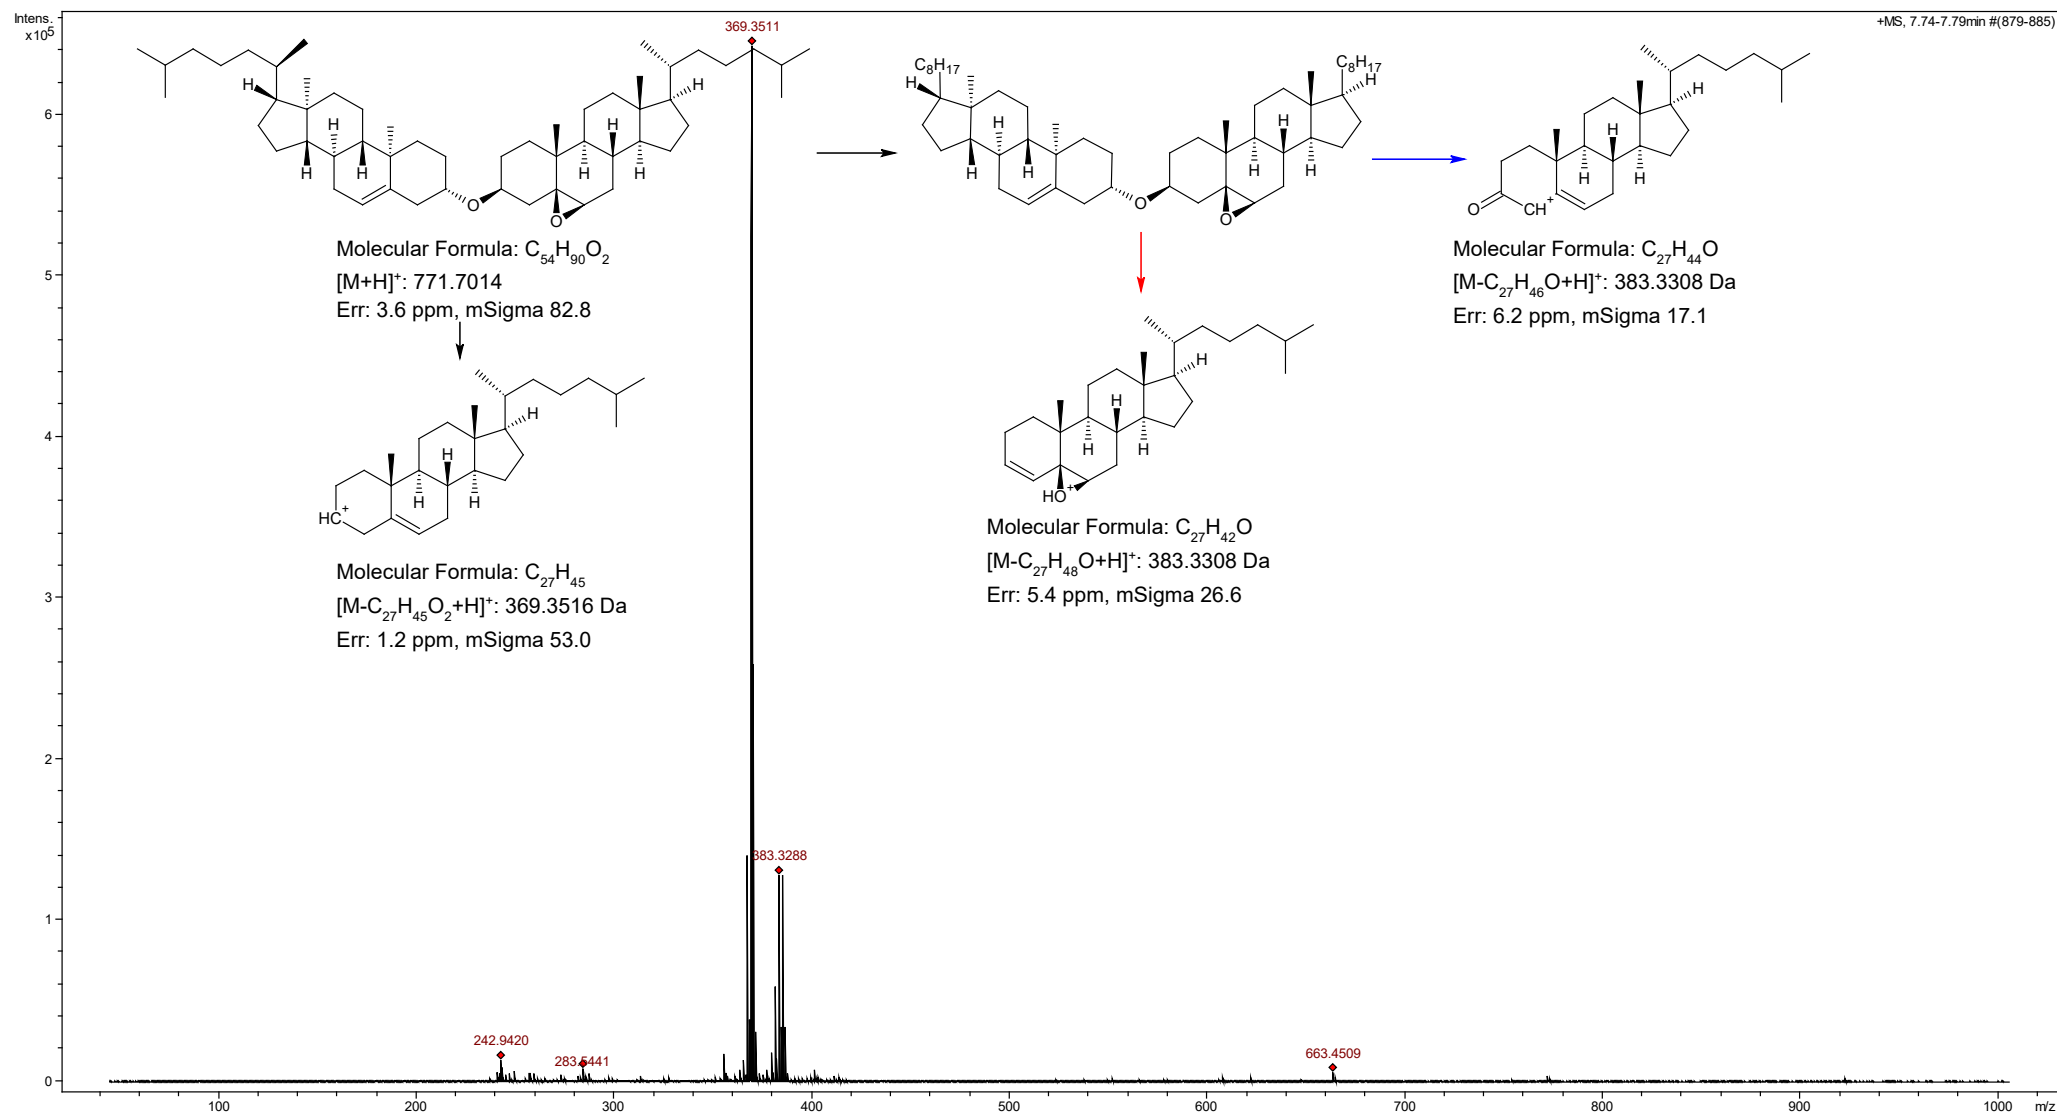

Figure S57. Mass spectrum of (5,6-epoxycholesteryl)-cholesterol ether (**19**).

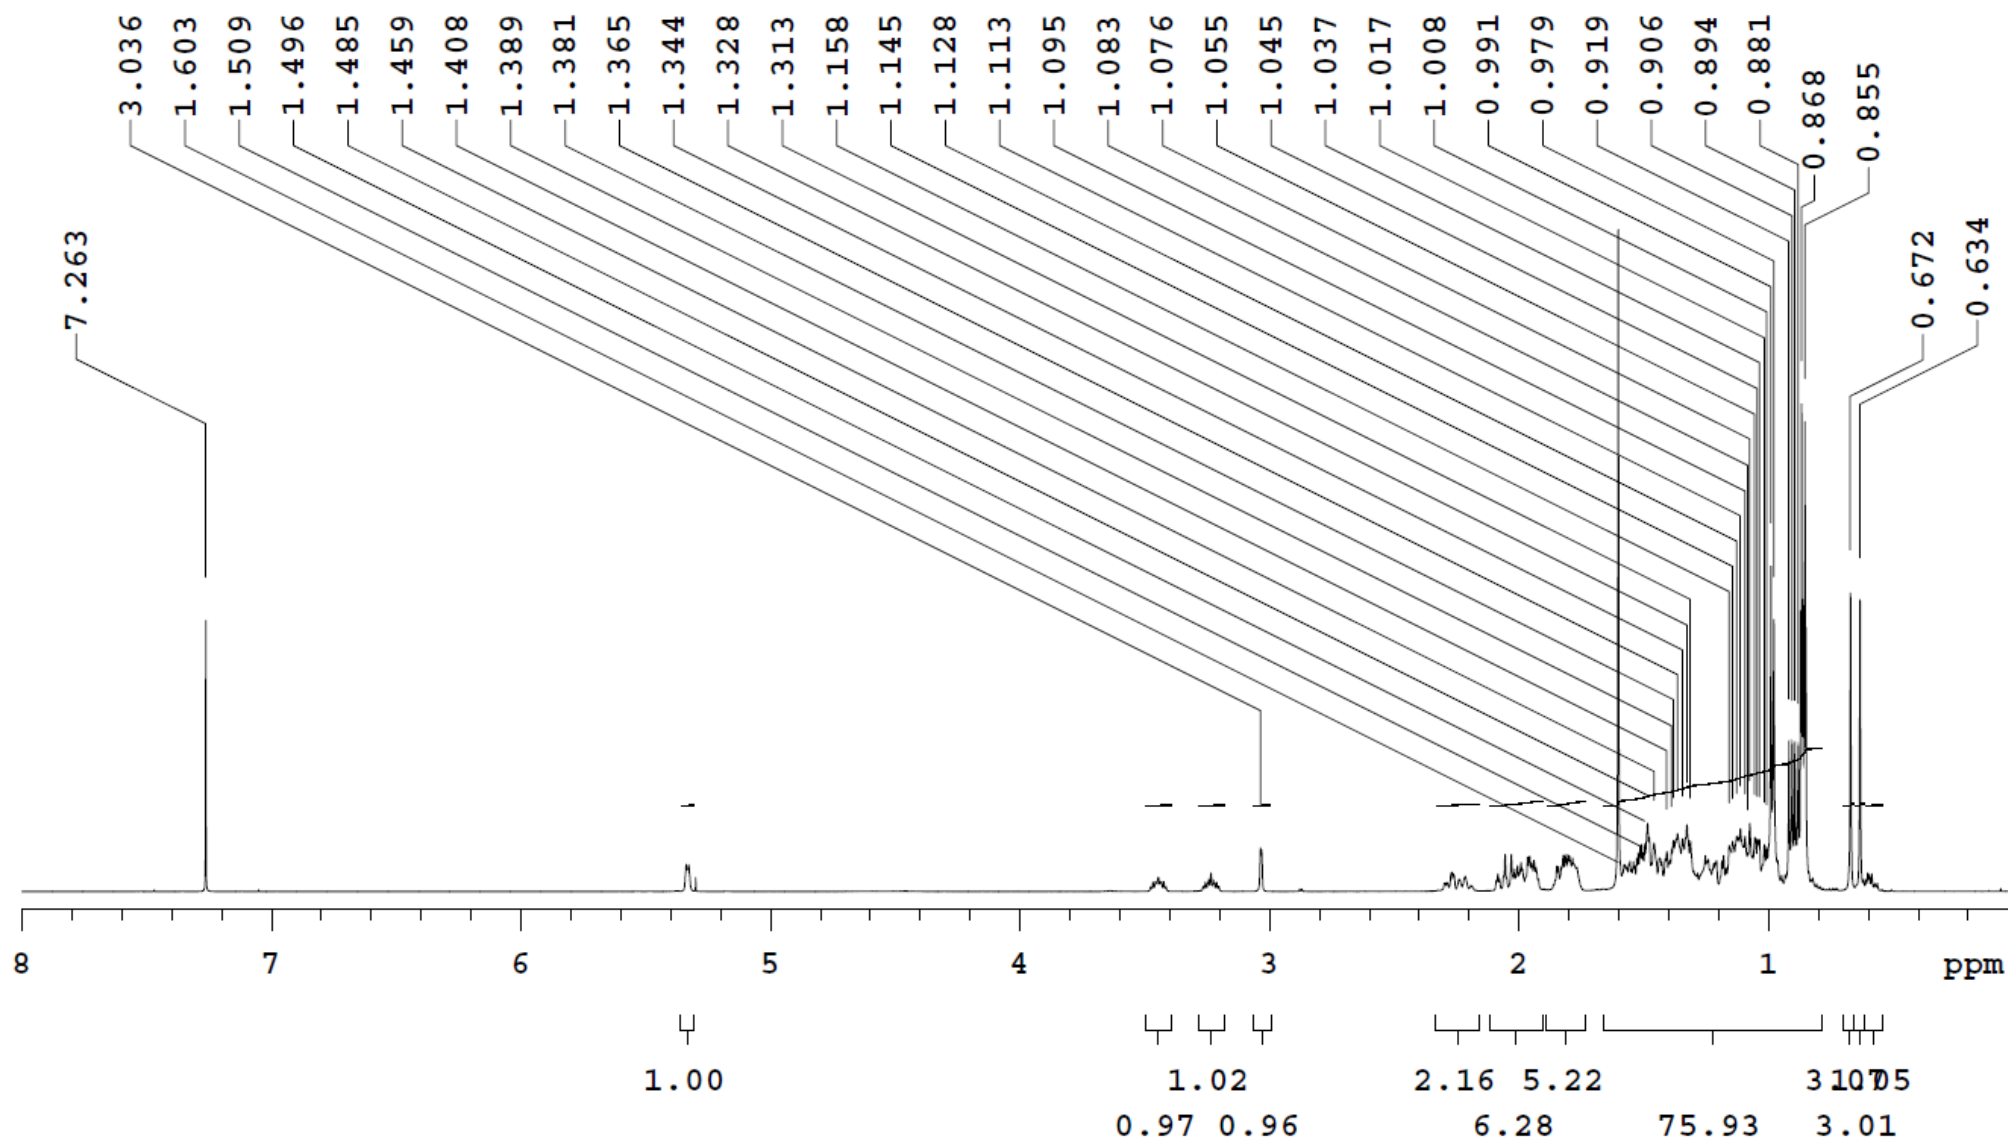

Figure S58. <sup>1</sup>H spectrum of (5,6β-epoxycholesteryl)-cholesterol ether (**19**) in CDCl<sub>3</sub>.

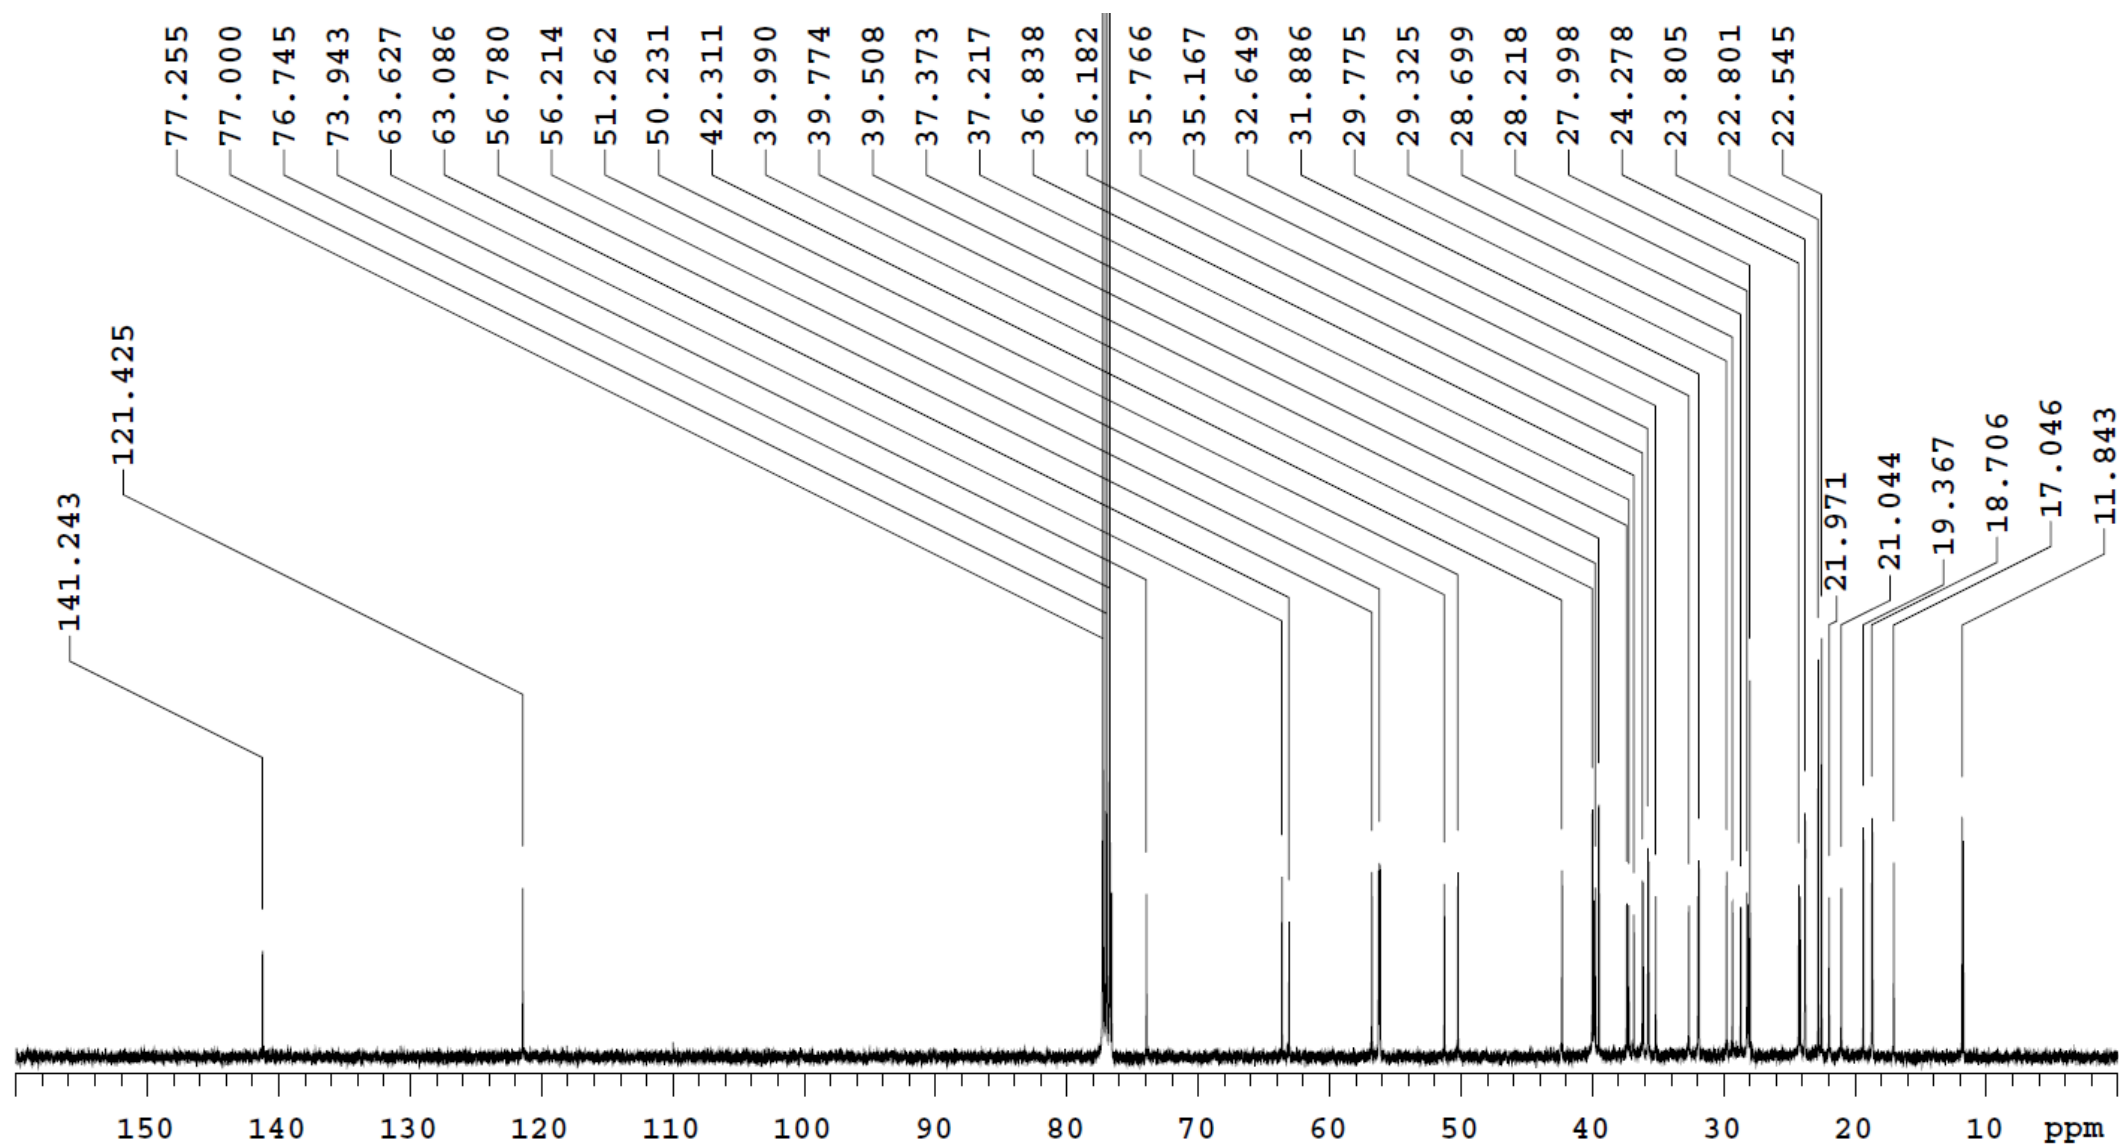

Figure S59. <sup>13</sup>C spectrum of (5,6β-epoxycholesteryl)-cholesterol ether (**19**) in CDCl<sub>3</sub>.

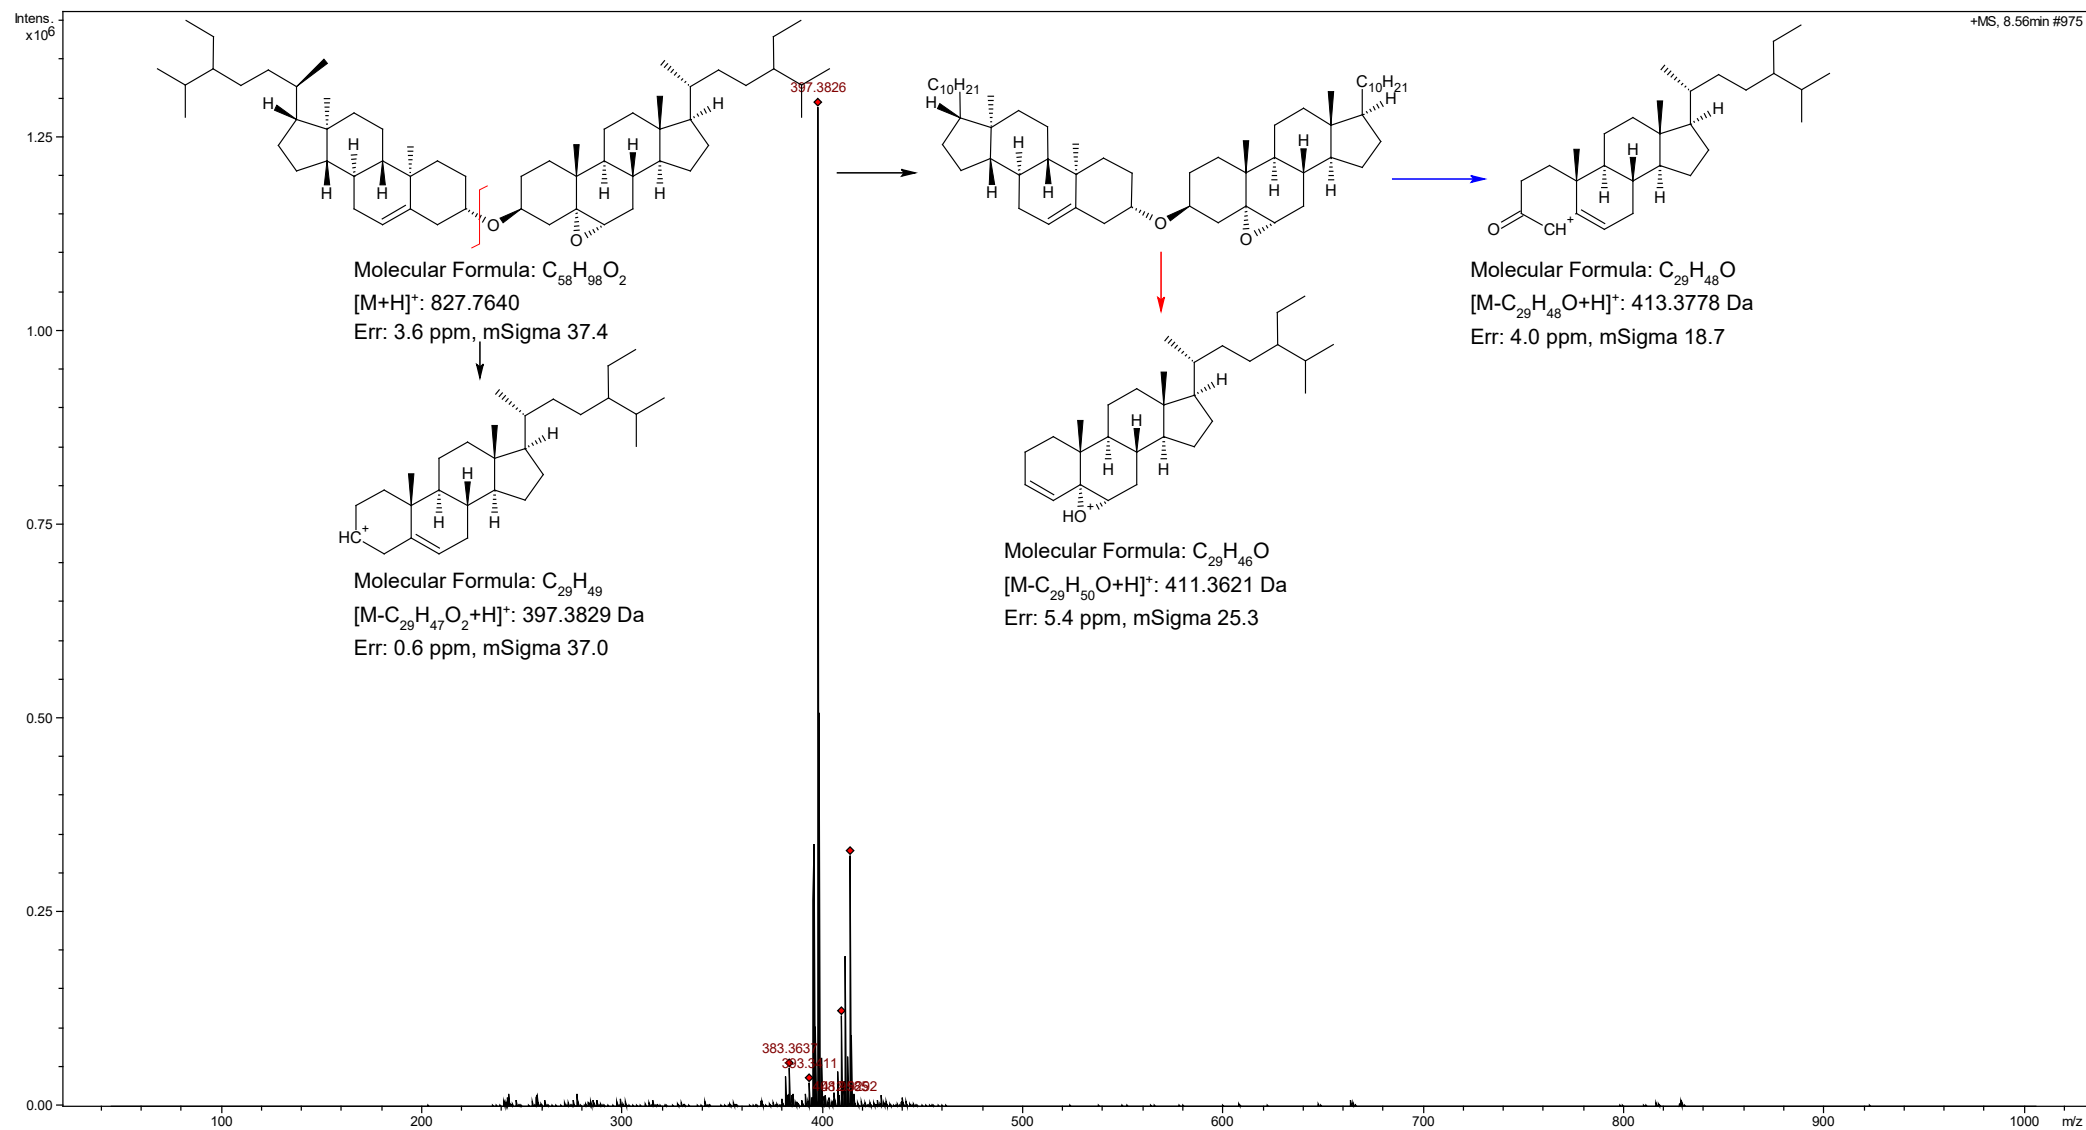

Figure S60. Mass spectrum of (5,6β-epoxysitosteryl)-sitosterol ether (20).

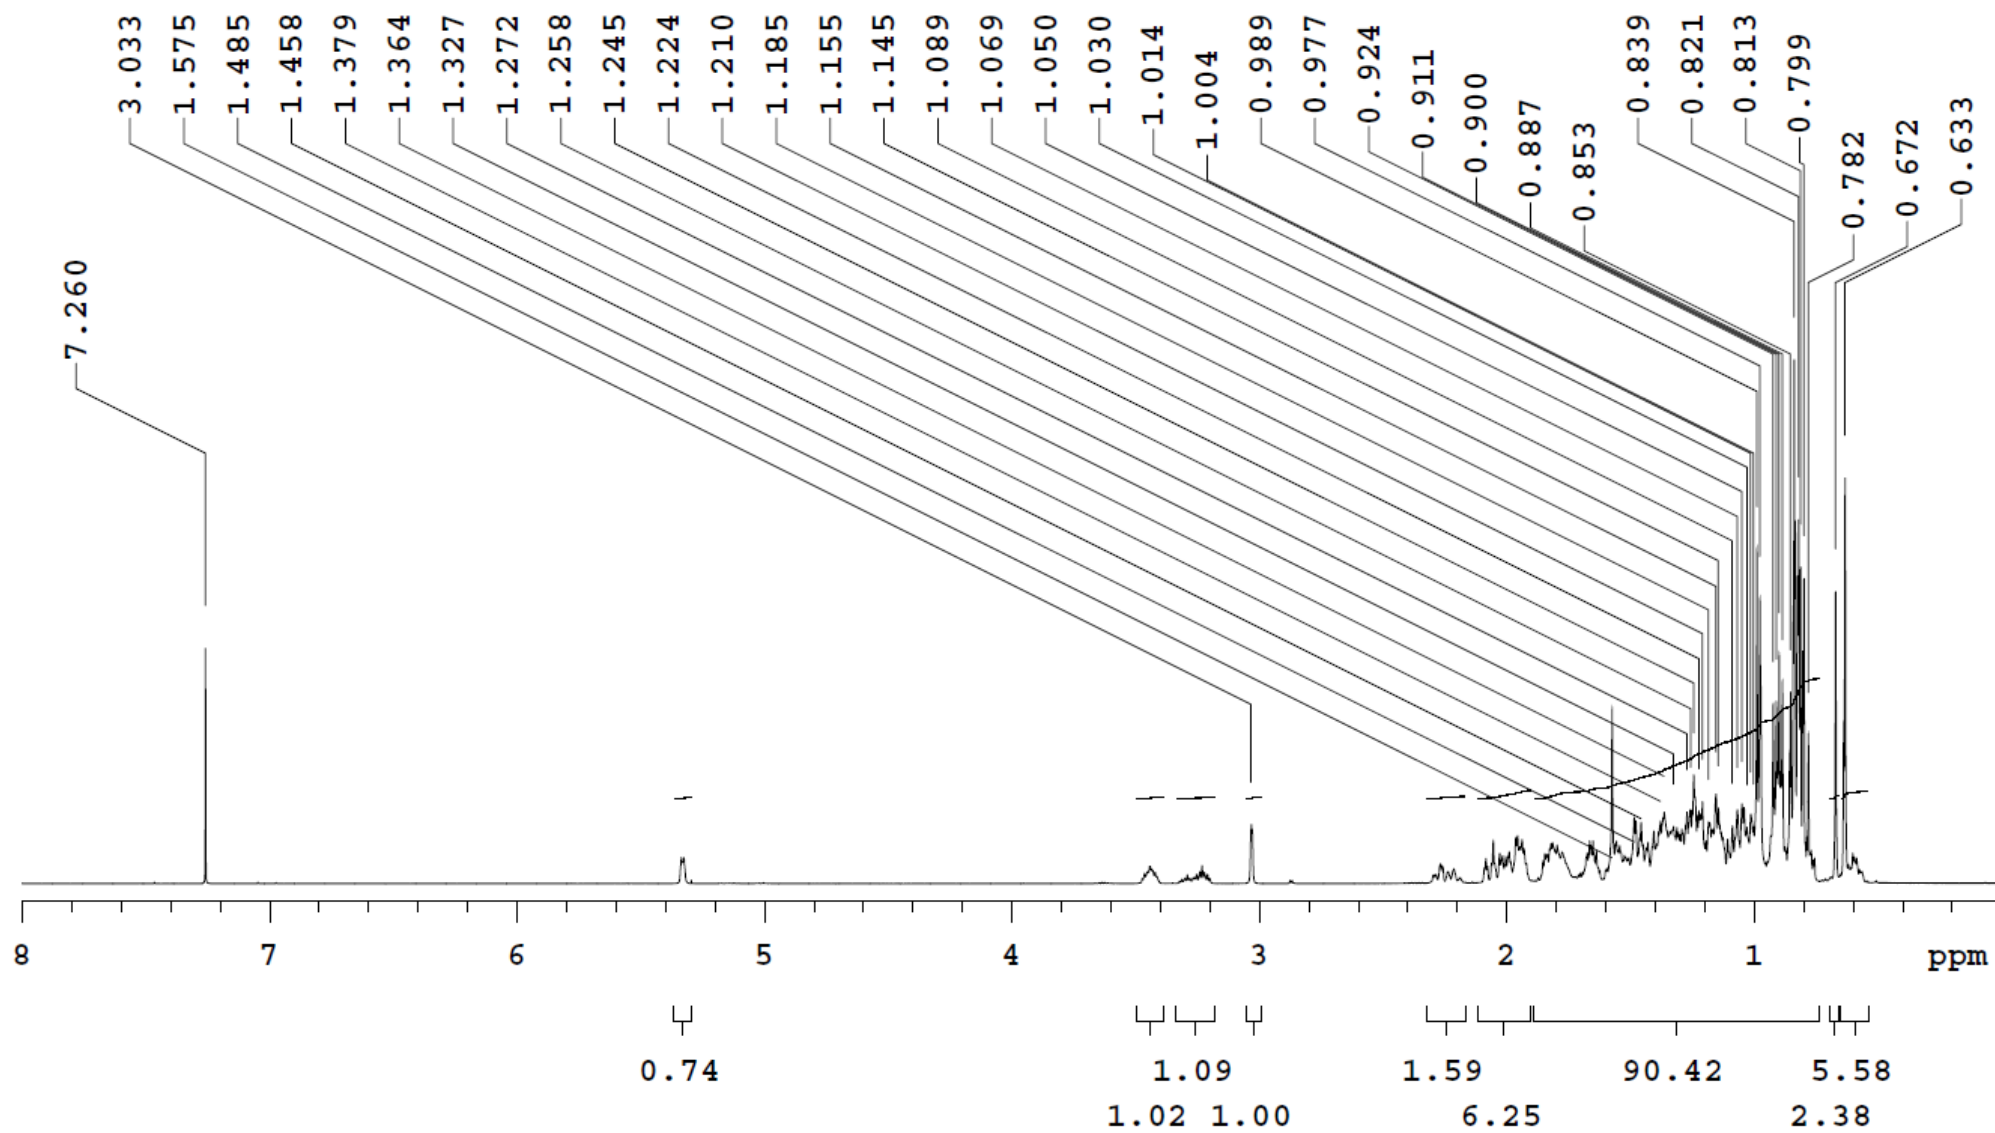

Figure S61. <sup>1</sup>H spectrum of (5,6β-epoxystosteryl)-sitosterol ether (**20**) in CDCl<sub>3</sub>.

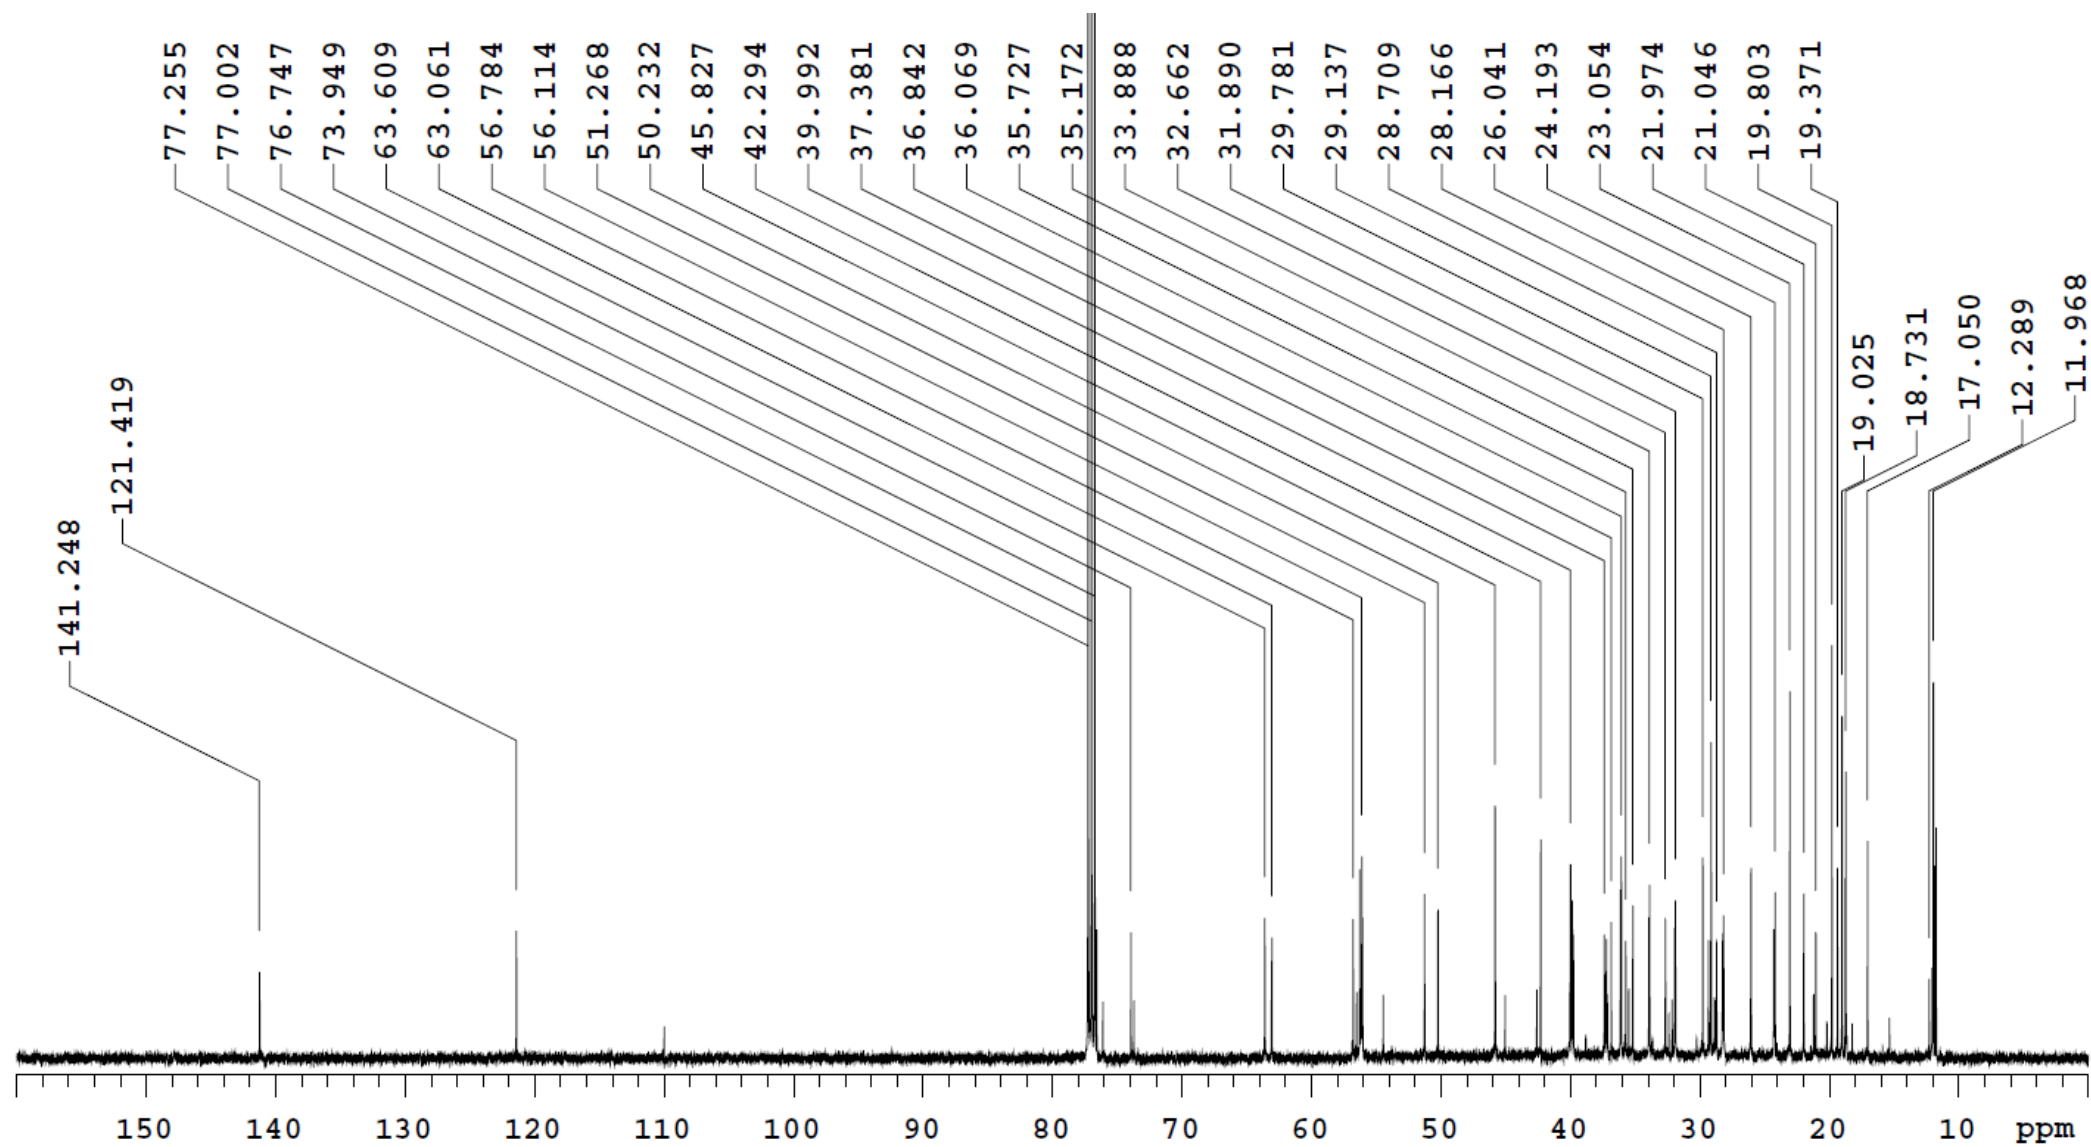

Figure S62. <sup>13</sup>C spectrum of (5,6β-epoxysitosteryl)-sitosterol ether (**20**) in CDCl<sub>3</sub>.

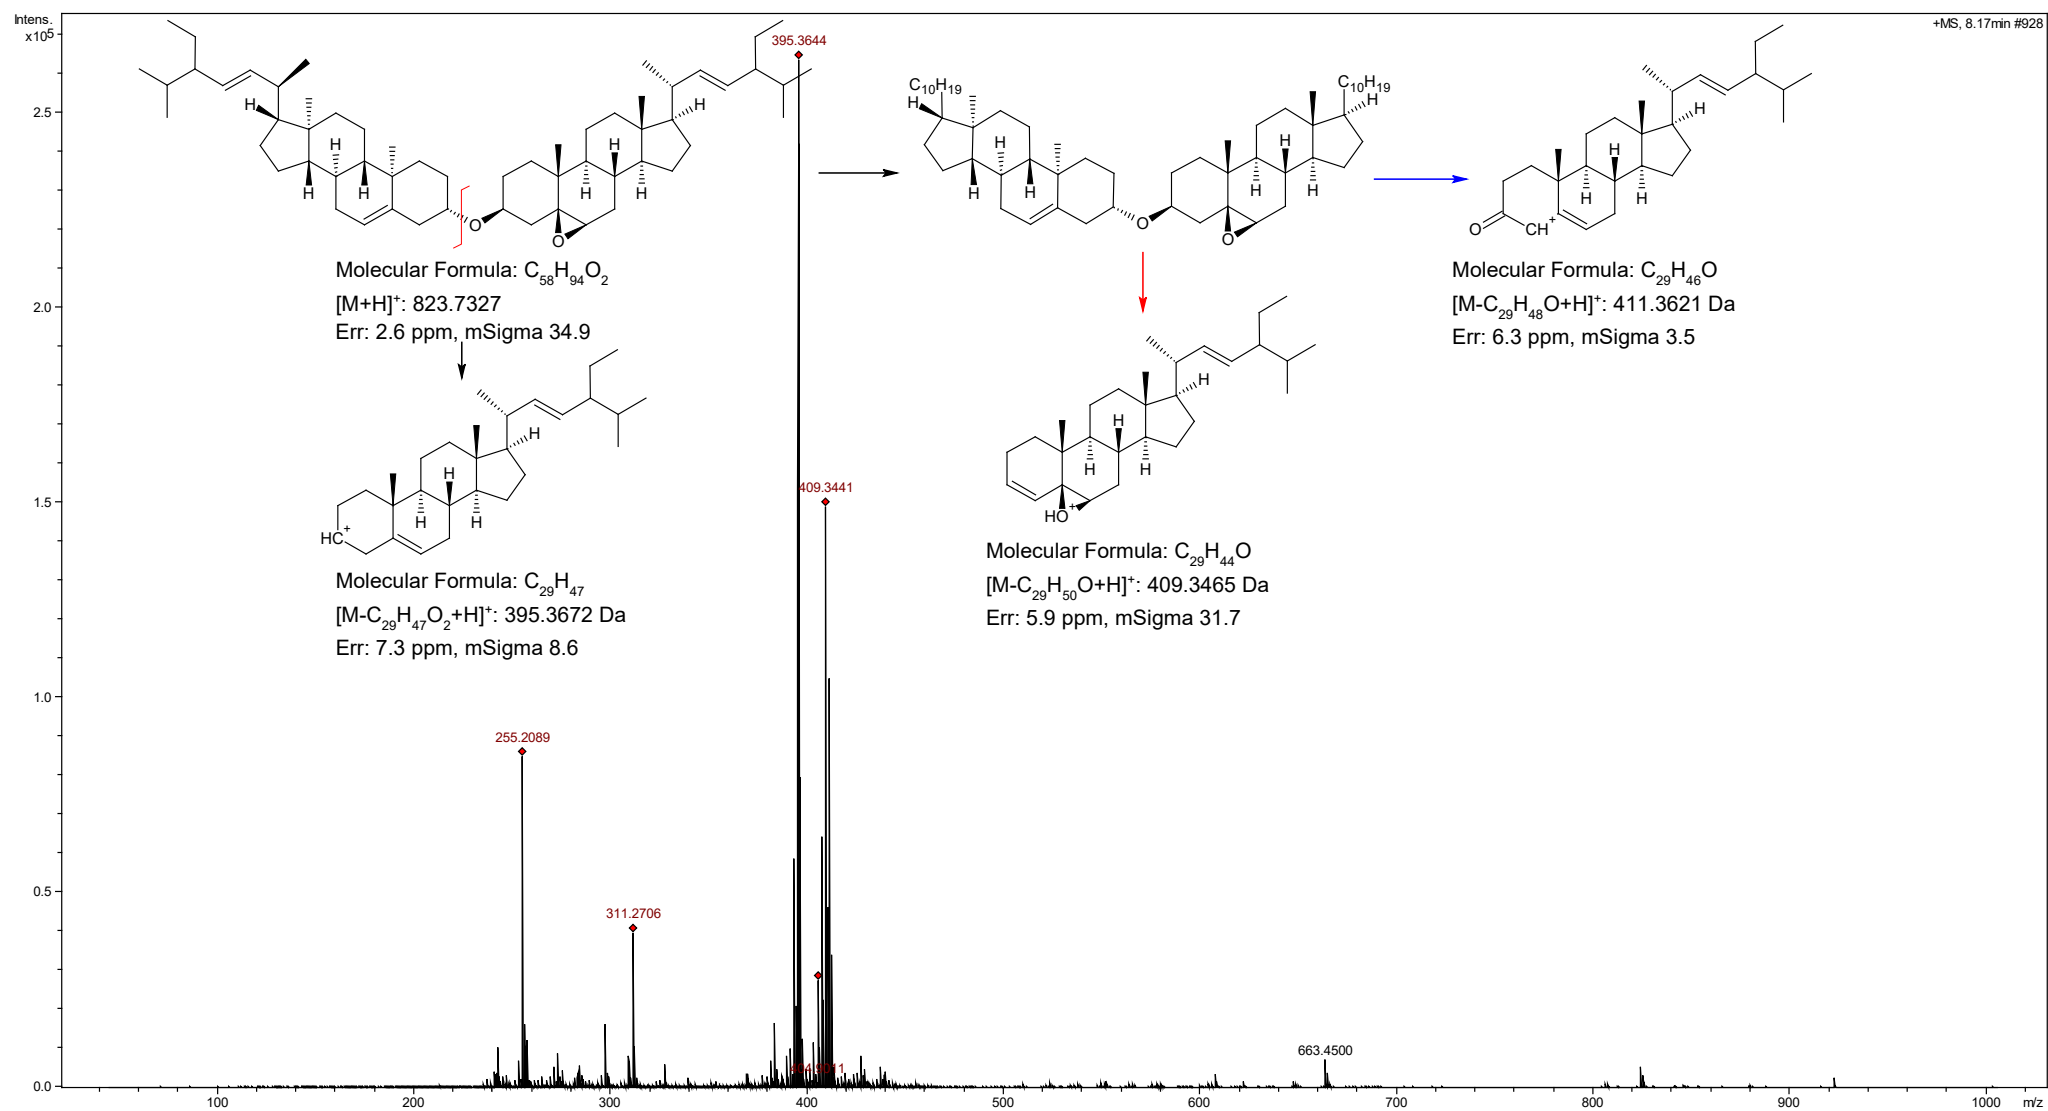

Figure S63. Mass spectrum of (5,6β-epoxystigmasteryl)-stigmasterol ether (**21**).

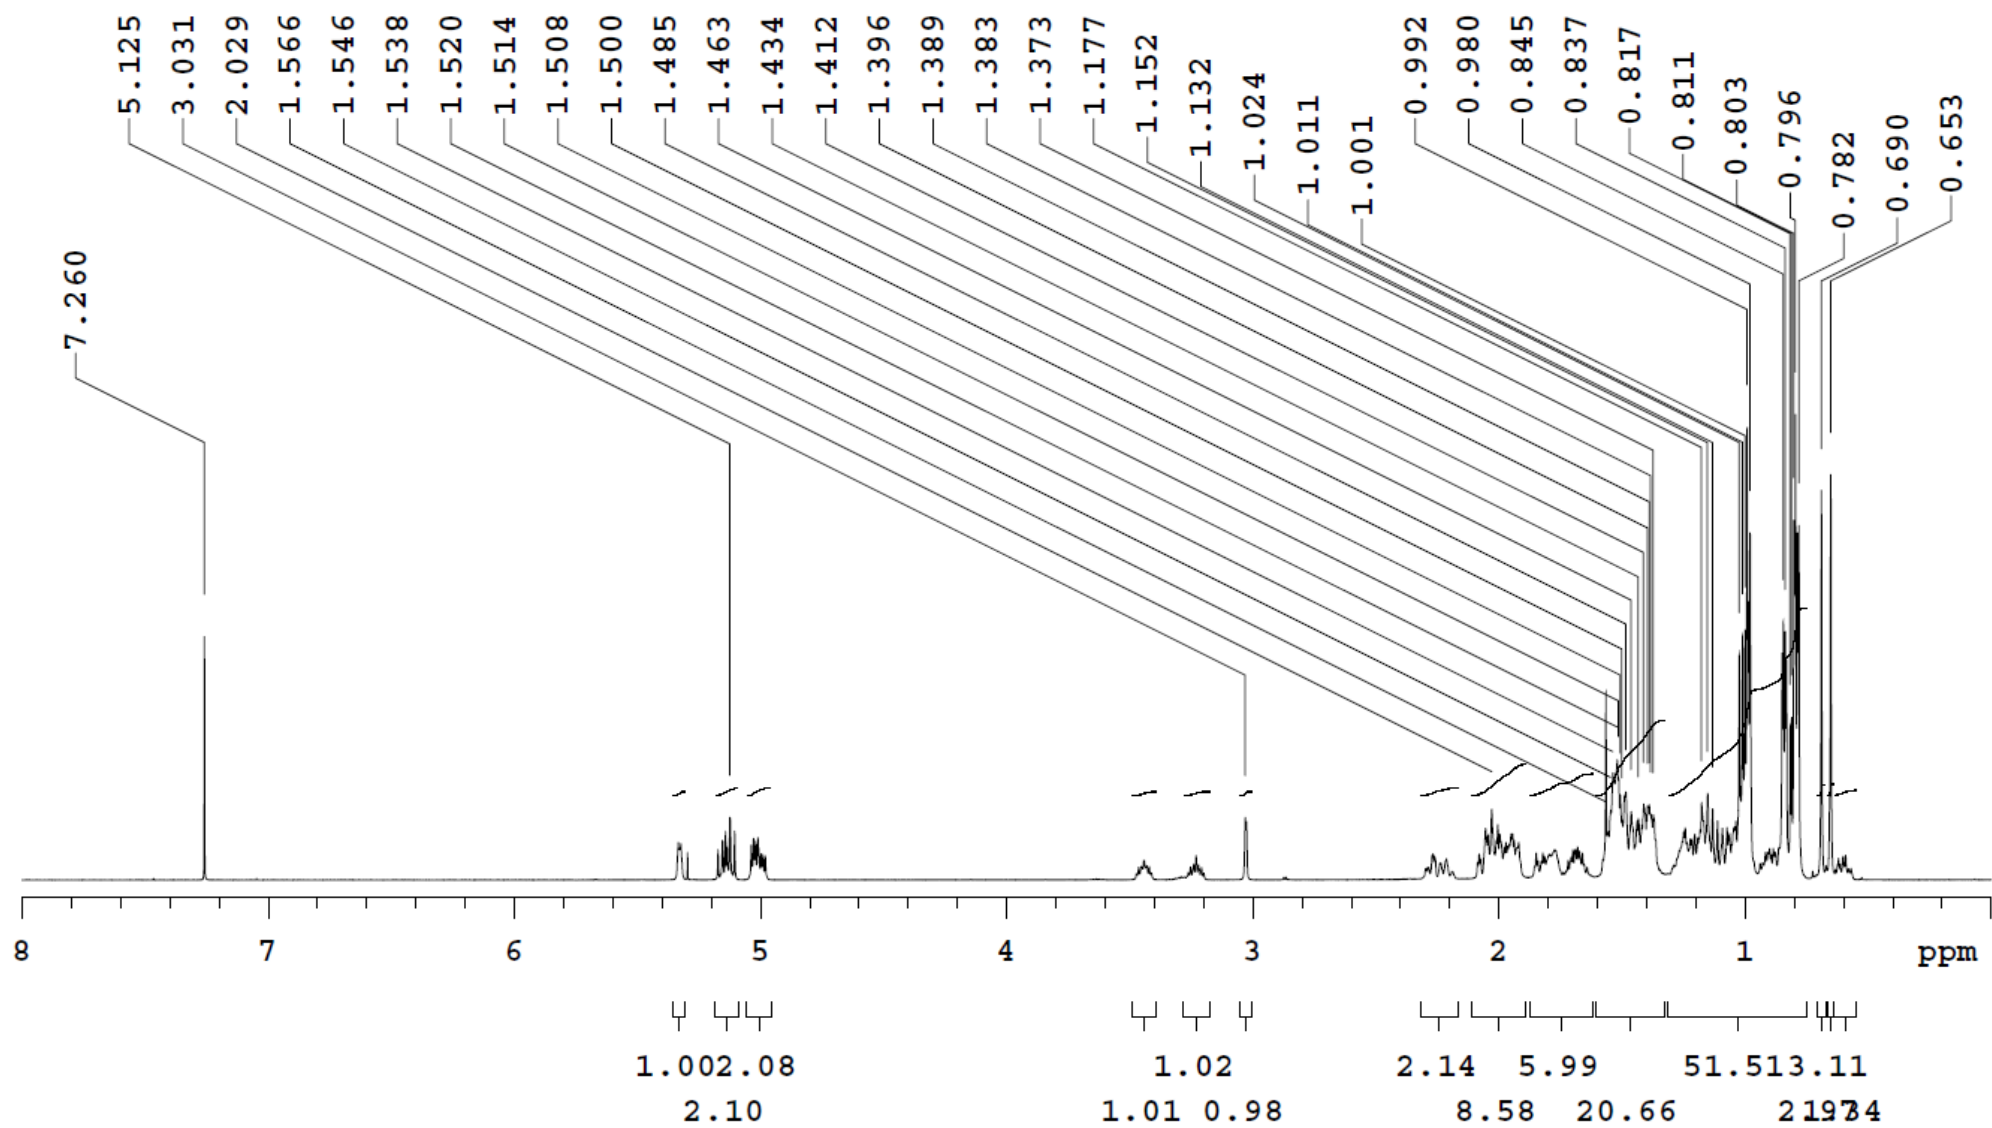

Figure S64. <sup>1</sup>H spectrum of (5,6β-epoxystigmasteryl)-stigmasteryl ether (**21**) in CDCl<sub>3</sub>.

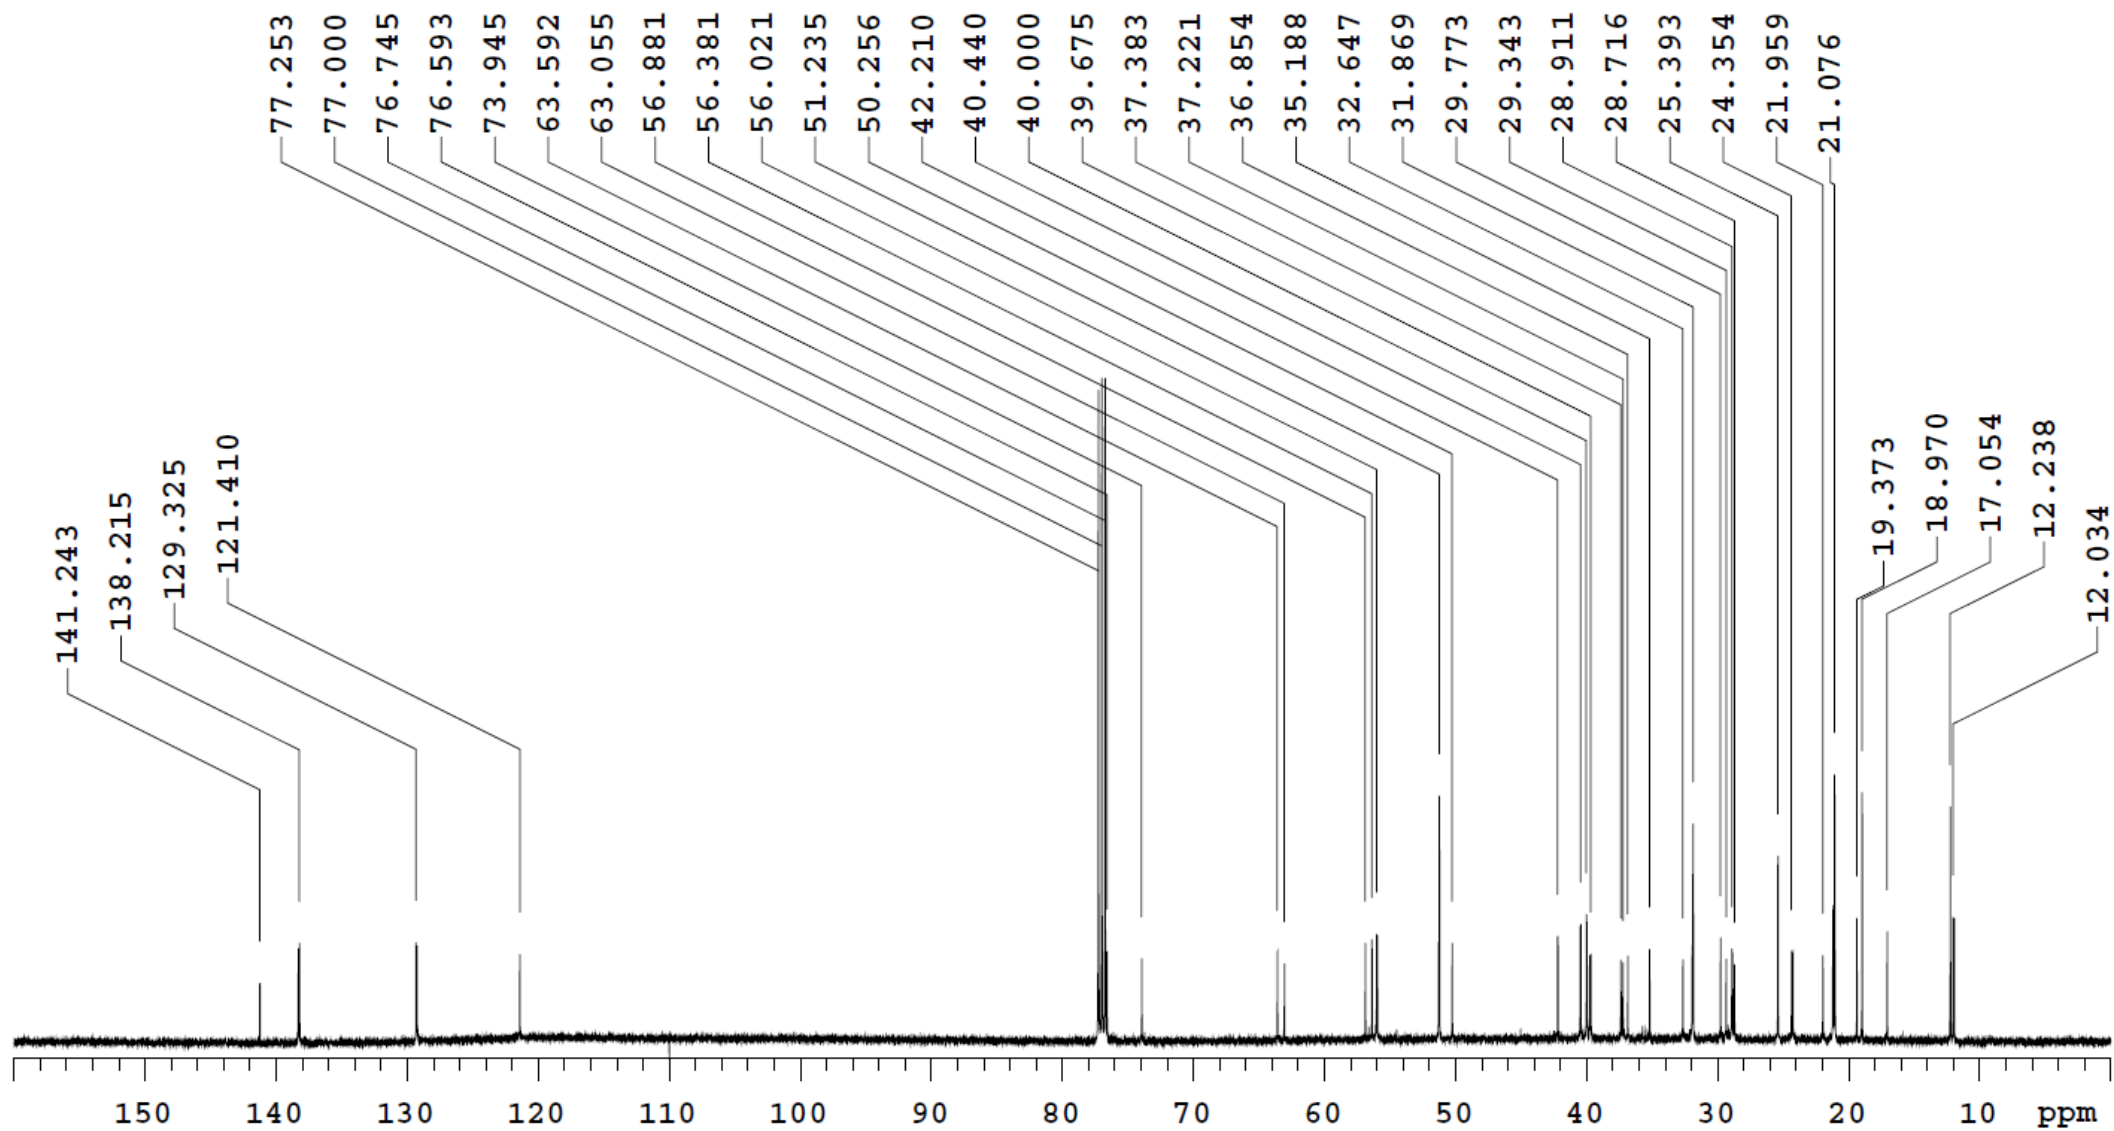

Figure S65. <sup>13</sup>C spectrum of (5,6β-epoxystigmasteryl)-stigmasteryl ether (**21**) in CDCl<sub>3</sub>.

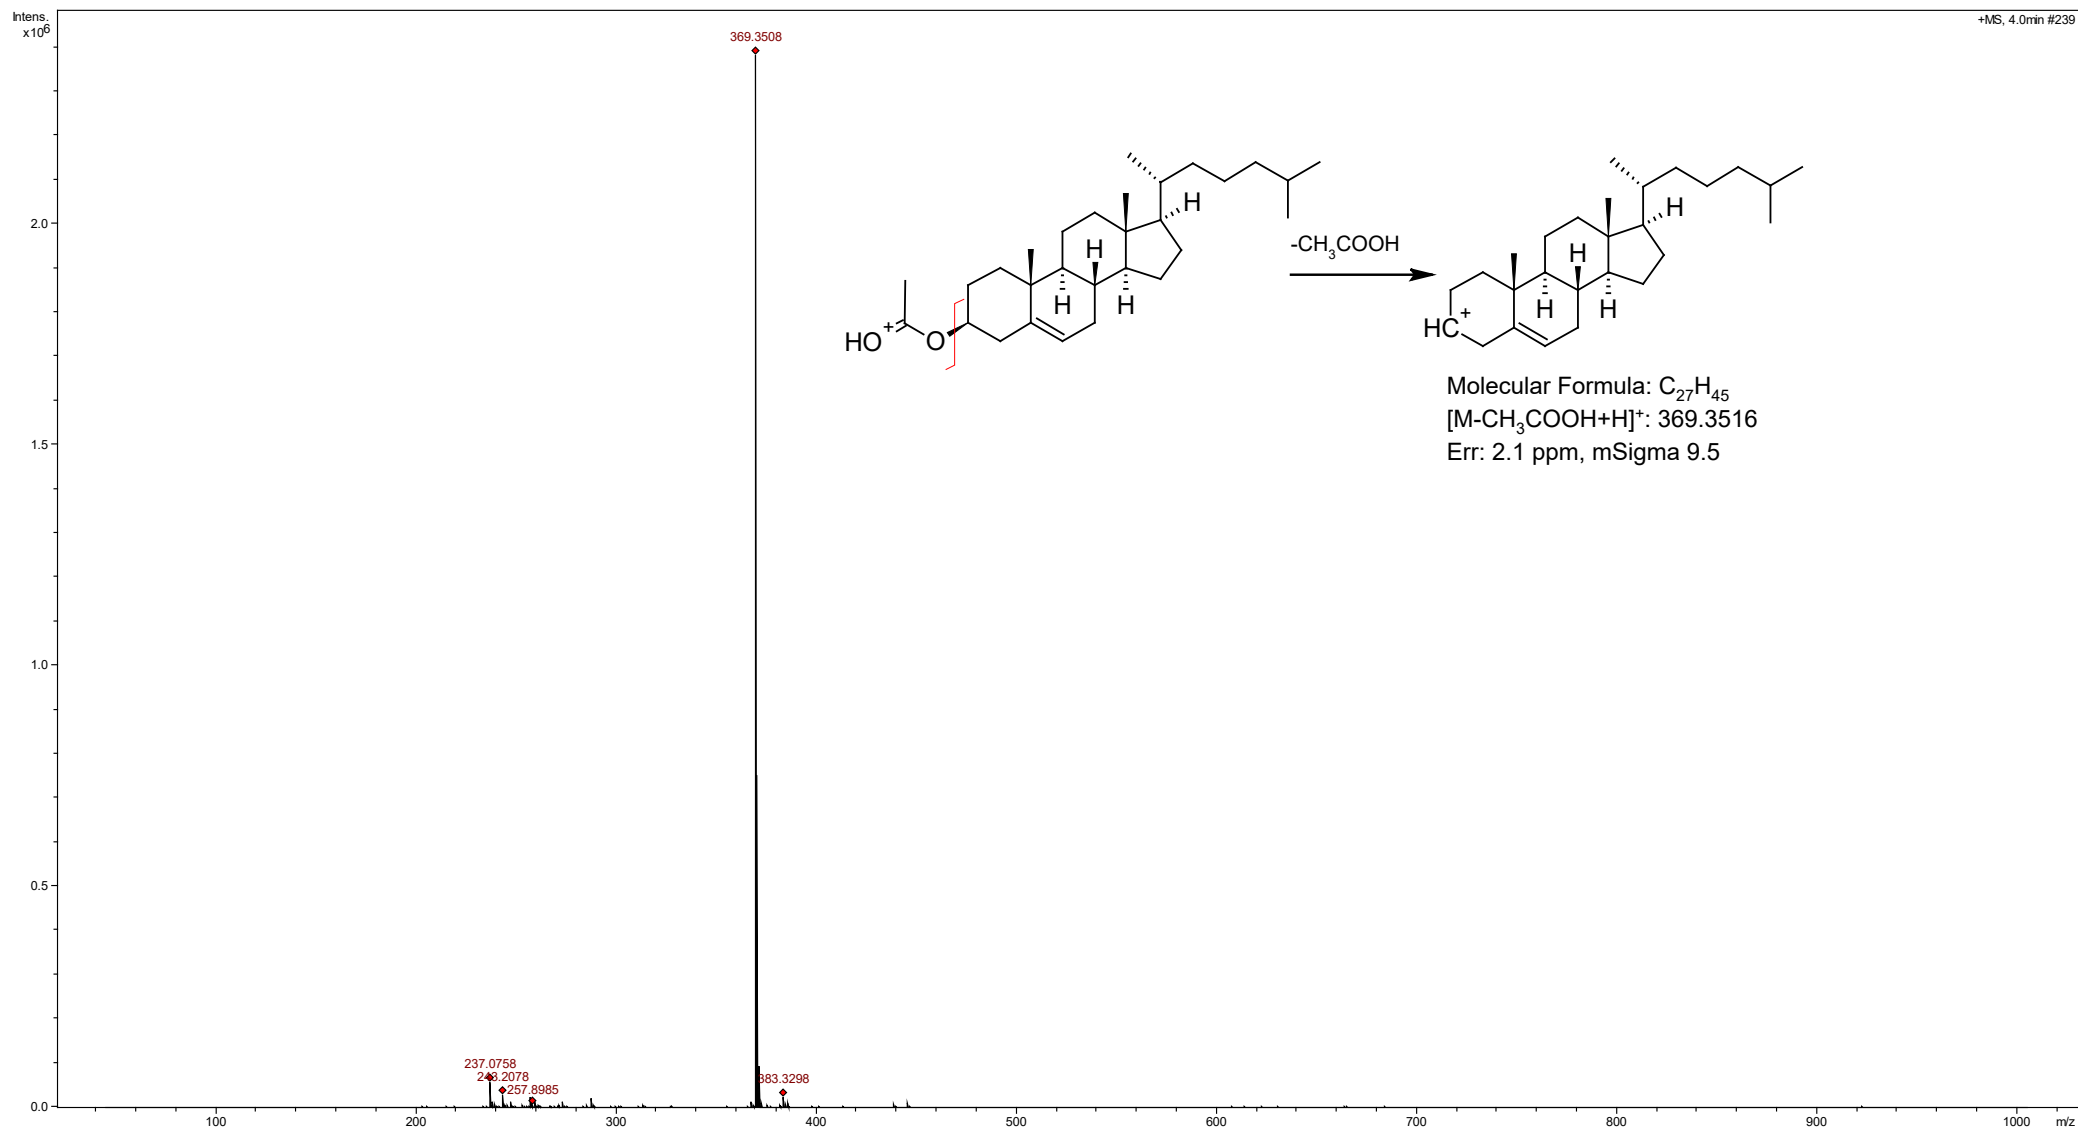

Figure S66. Mass spectrum of cholest-5-en-3 $\beta$ -yl acetate (Cholesteryl acetate) (**22**)

Pulse Sequence: PROTON (s2pul)  
 Solvent: cdcl3  
 Data collected on: Jan 11 2019

Temp. 25.3 C / 298.4 K  
 Operator: vnmr1

Relax. delay 1.000 sec  
 Pulse 32.1 degrees  
 Acq. time 4.000 sec  
 Width 8012.8 Hz  
 64 repetitions  
 OBSERVE H1, 499.8026298 MHz  
 DATA PROCESSING  
 Line broadening 0.1 Hz  
 Gauss apodization 0.800 sec  
 FT size 262144  
 Total time 5 min 20 sec

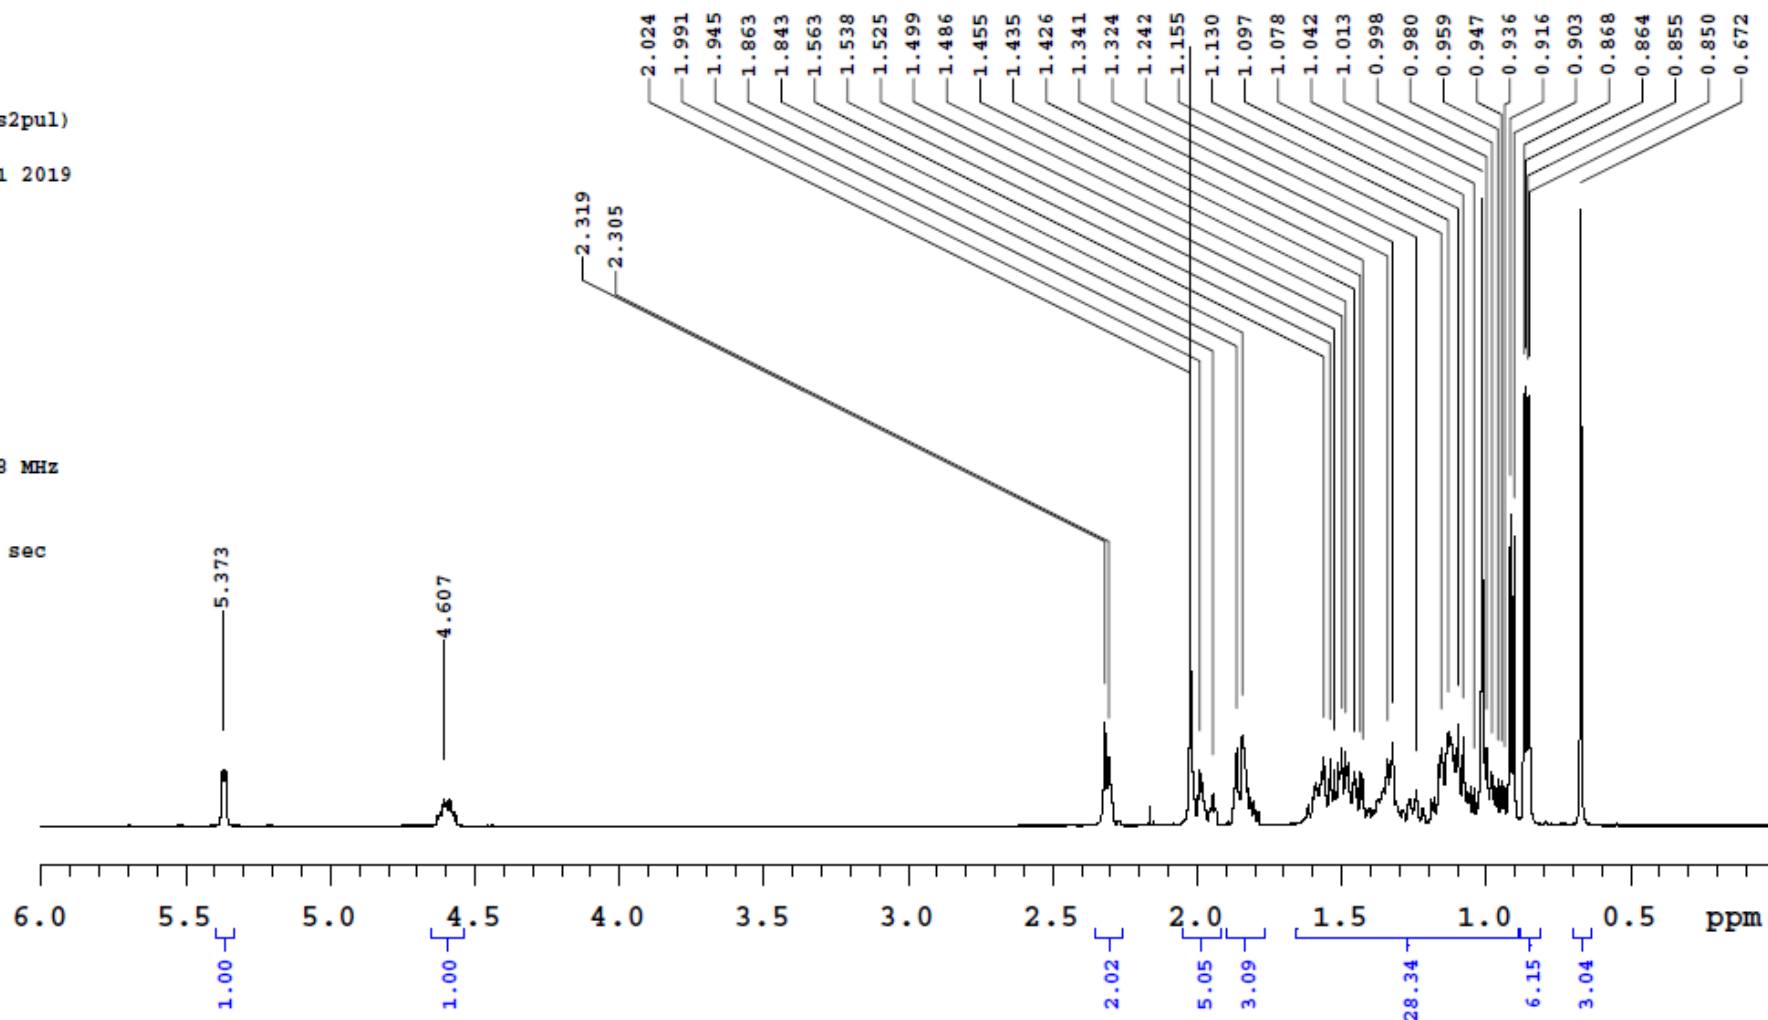

Figure S67.  $^1\text{H}$  spectrum of cholest-5-en-3 $\beta$ -yl acetate (Cholesteryl acetate) (**22**) in  $\text{CDCl}_3$

Pulse Sequence: CARBON (s2pul)  
Solvent: cdcl3  
Data collected on: Jan 11 2019

Temp. 25.3 C / 298.4 K  
Operator: vnmr1

Relax. delay 0.500 sec  
Pulse 25.0 degrees  
Acq. time 1.200 sec  
Width 37878.8 Hz  
128 repetitions  
OBSERVE C13, 125.6754712 MHz  
DECOUPLE H1, 499.8051288 MHz  
Power 34 dB  
continuously on  
WALTZ-16 modulated  
DATA PROCESSING  
Line broadening 1.0 Hz  
FT size 262144  
Total time 1 hr, 56 min

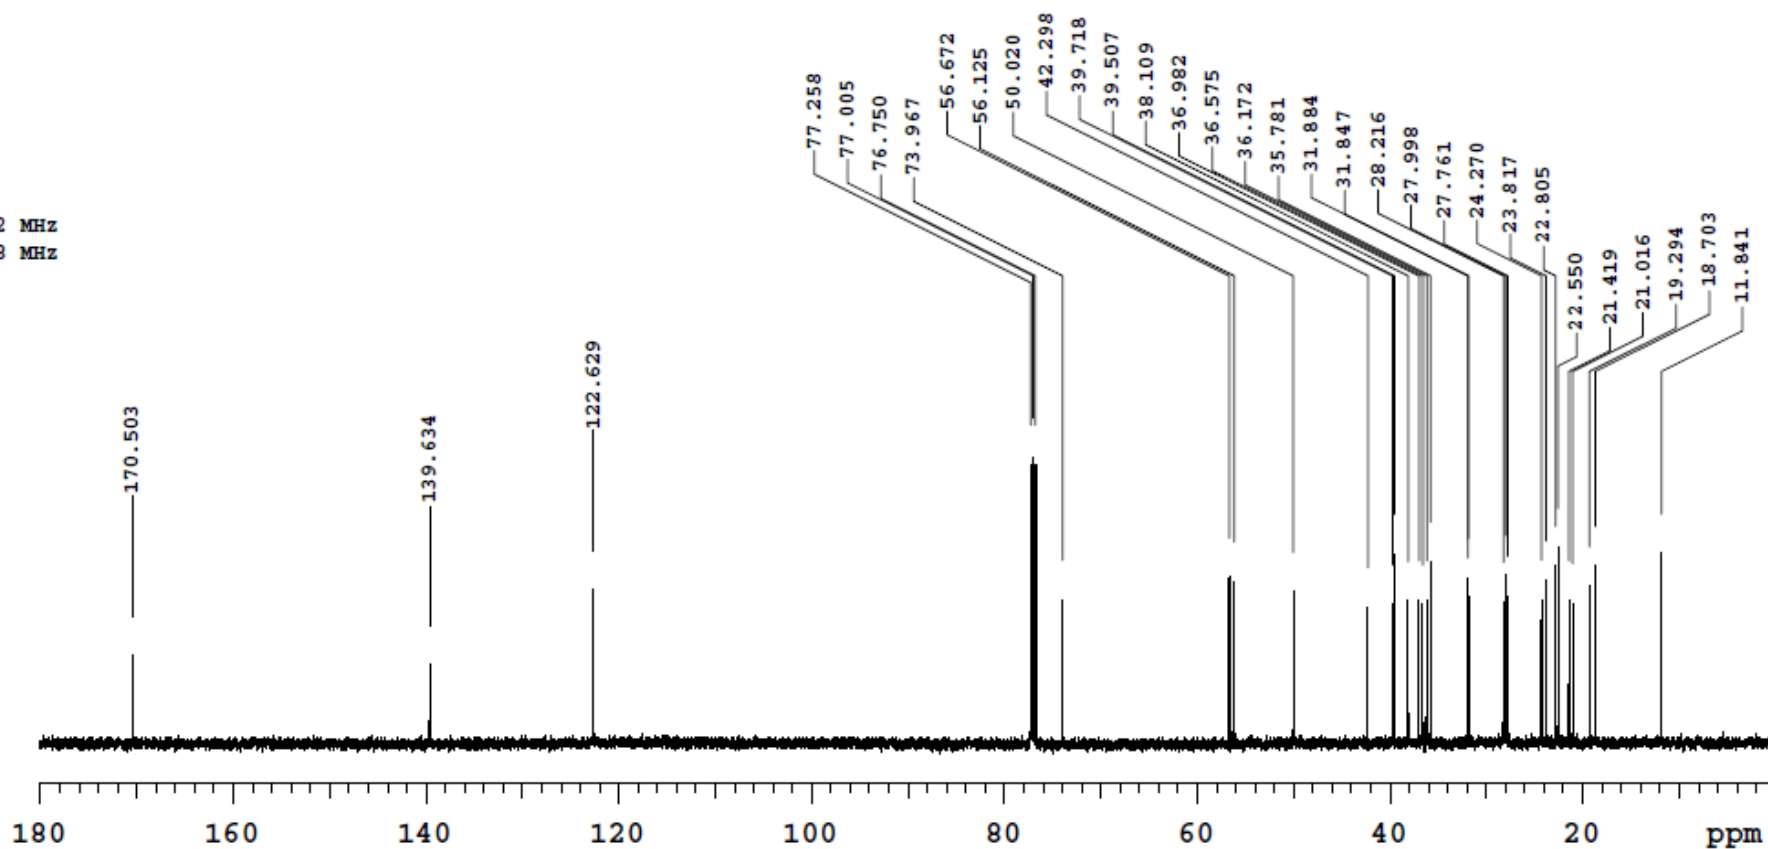

Figure S68.  $^{13}\text{C}$  spectrum of cholest-5-en-3 $\beta$ -yl acetate (Cholesteryl acetate) (**22**) in  $\text{CDCl}_3$

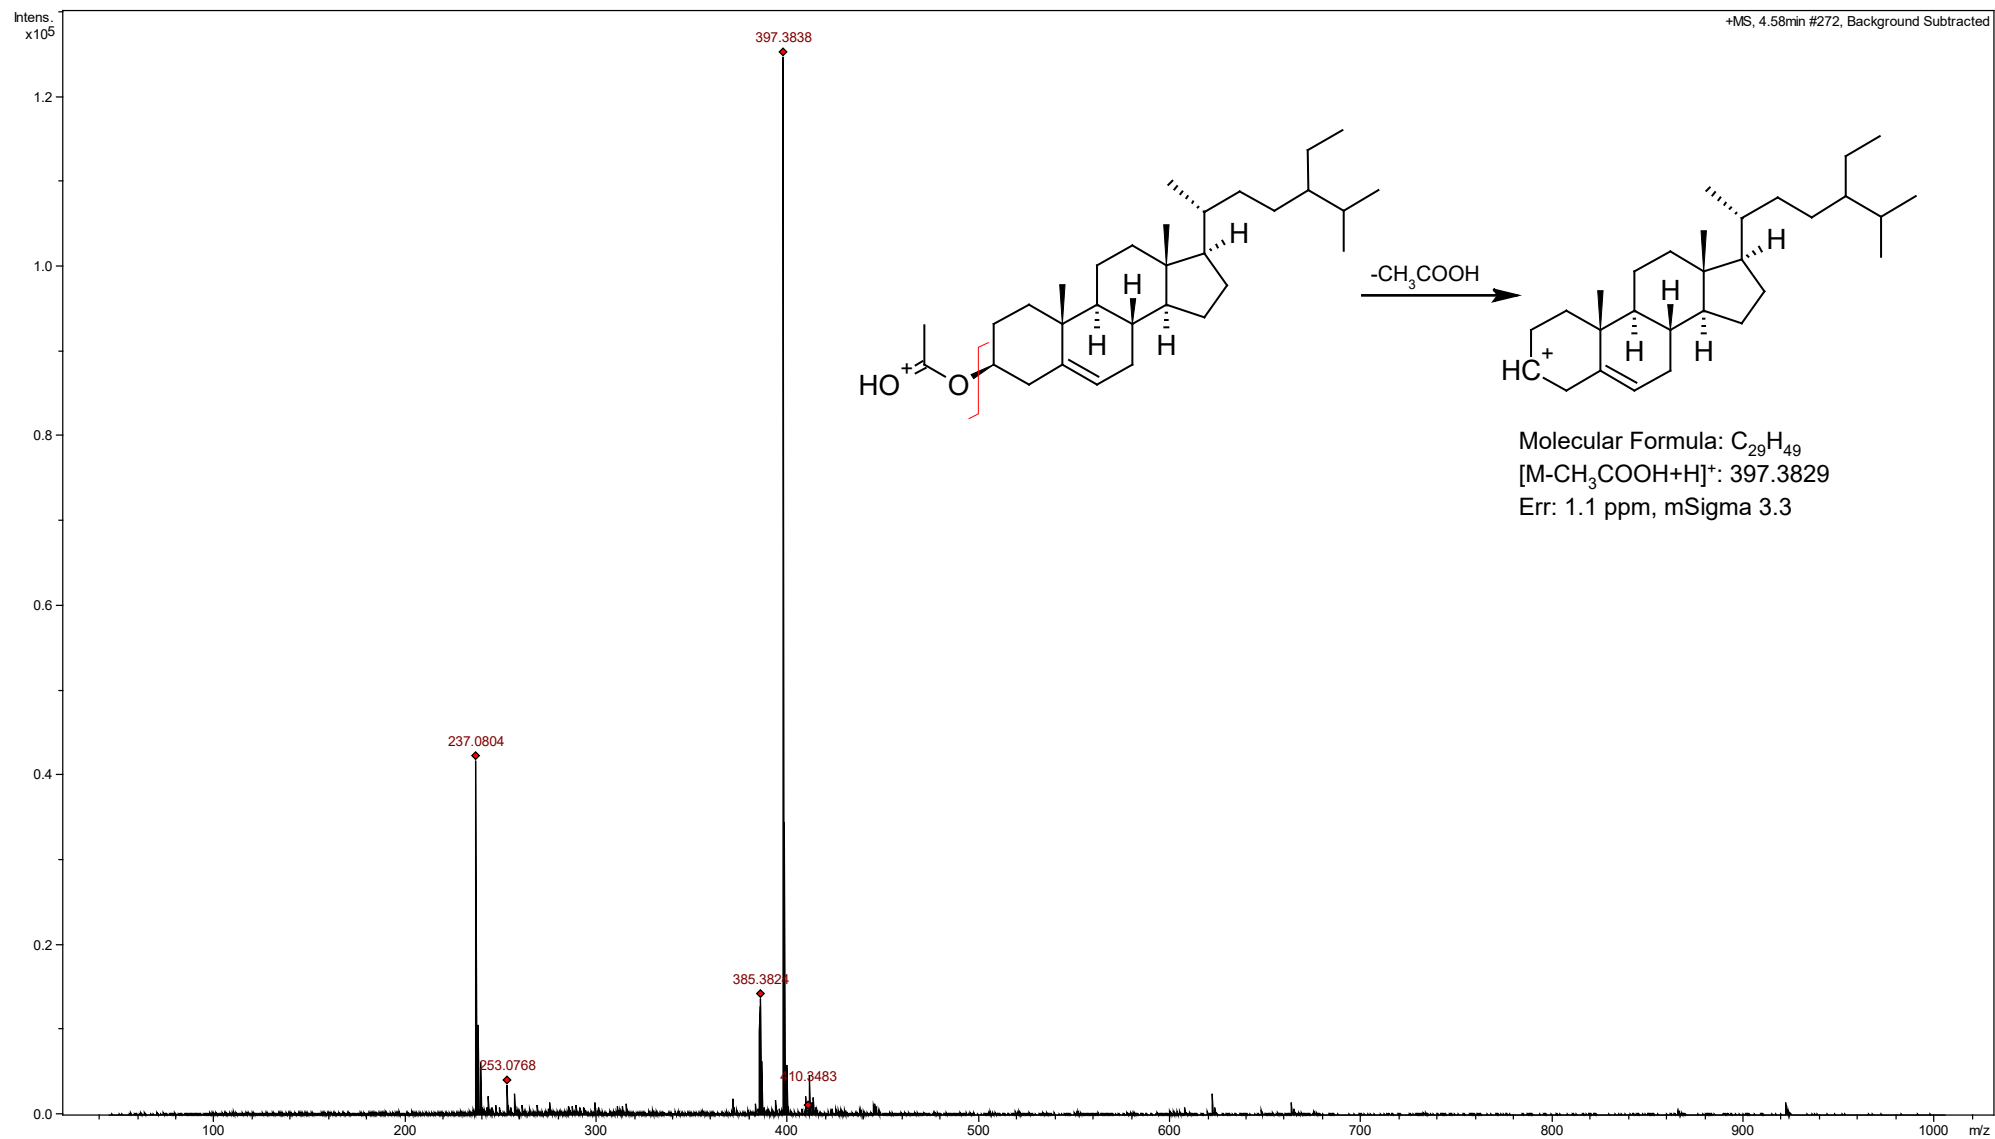

Figure S69. Mass spectrum of sitost-5-en-3 $\beta$ -yl acetate ( $\beta$ -Sitosteryl acetate) (23)

Pulse Sequence: PROTON (s2pul)  
 Solvent: cdcl3  
 Data collected on: Mar 25 2019

Temp. 25.3 C / 298.4 K  
 Operator: vnmr1

Relax. delay 1.000 sec  
 Pulse 31.7 degrees  
 Acq. time 4.000 sec  
 Width 8012.8 Hz  
 64 repetitions  
 OBSERVE H1, 499.8026287 MHz  
 DATA PROCESSING  
 Line broadening 0.1 Hz  
 FT size 524288  
 Total time 5 min 20 sec

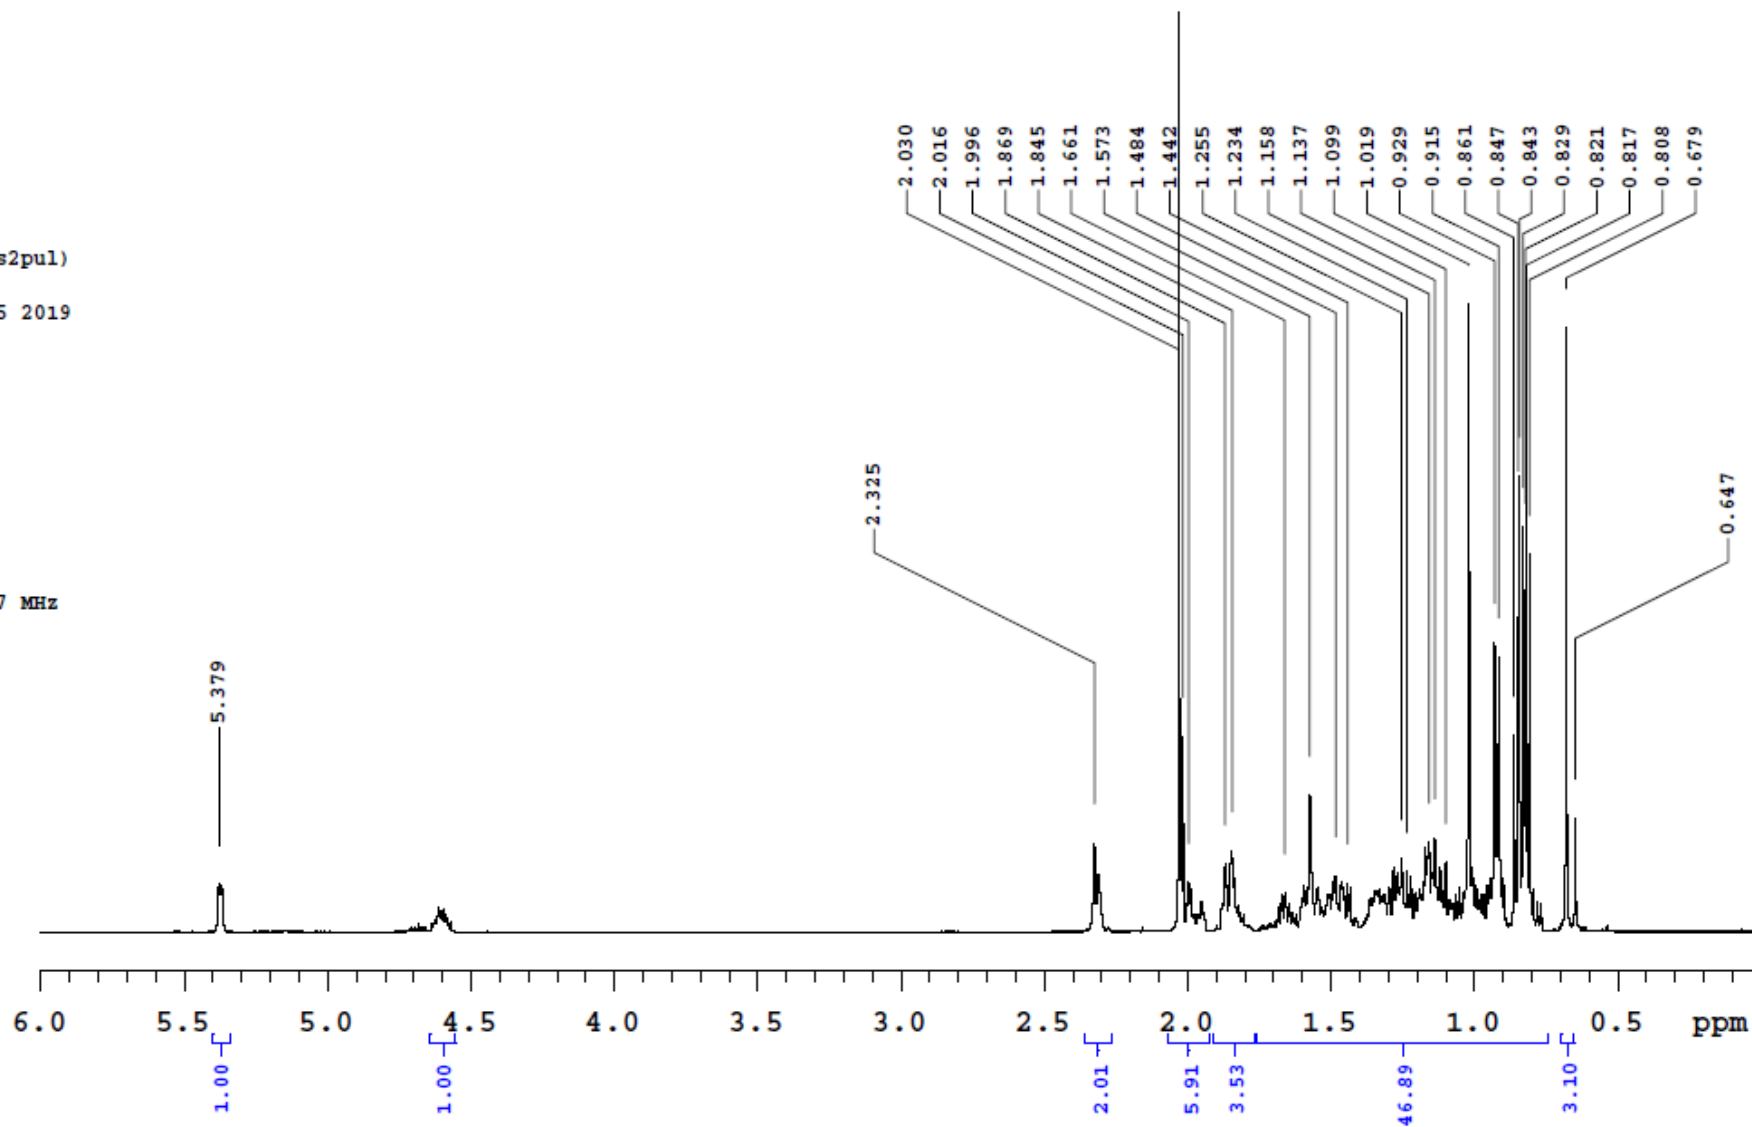

Figure S70.  $^1\text{H}$  spectrum of sitost-5-en-3 $\beta$ -yl acetate ( $\beta$ -Sitosteryl acetate) (**23**) in  $\text{CDCl}_3$

Pulse Sequence: CARBON (s2pul)  
 Solvent: cdcl3  
 Data collected on: Mar 25 2019

Temp. 25.3 C / 298.4 K  
 Operator: vnmr1

Relax. delay 0.500 sec  
 Pulse 29.4 degrees  
 Acq. time 1.022 sec  
 Width 32051.3 Hz  
 2752 repetitions

OBSERVE C13, 125.6754712 MHz  
 DECOUPLE H1, 499.8051288 MHz

Power 34 dB  
 continuously on  
 WALTZ-16 modulated

DATA PROCESSING  
 Line broadening 1.0 Hz  
 FT size 262144  
 Total time 1 hr, 44 min

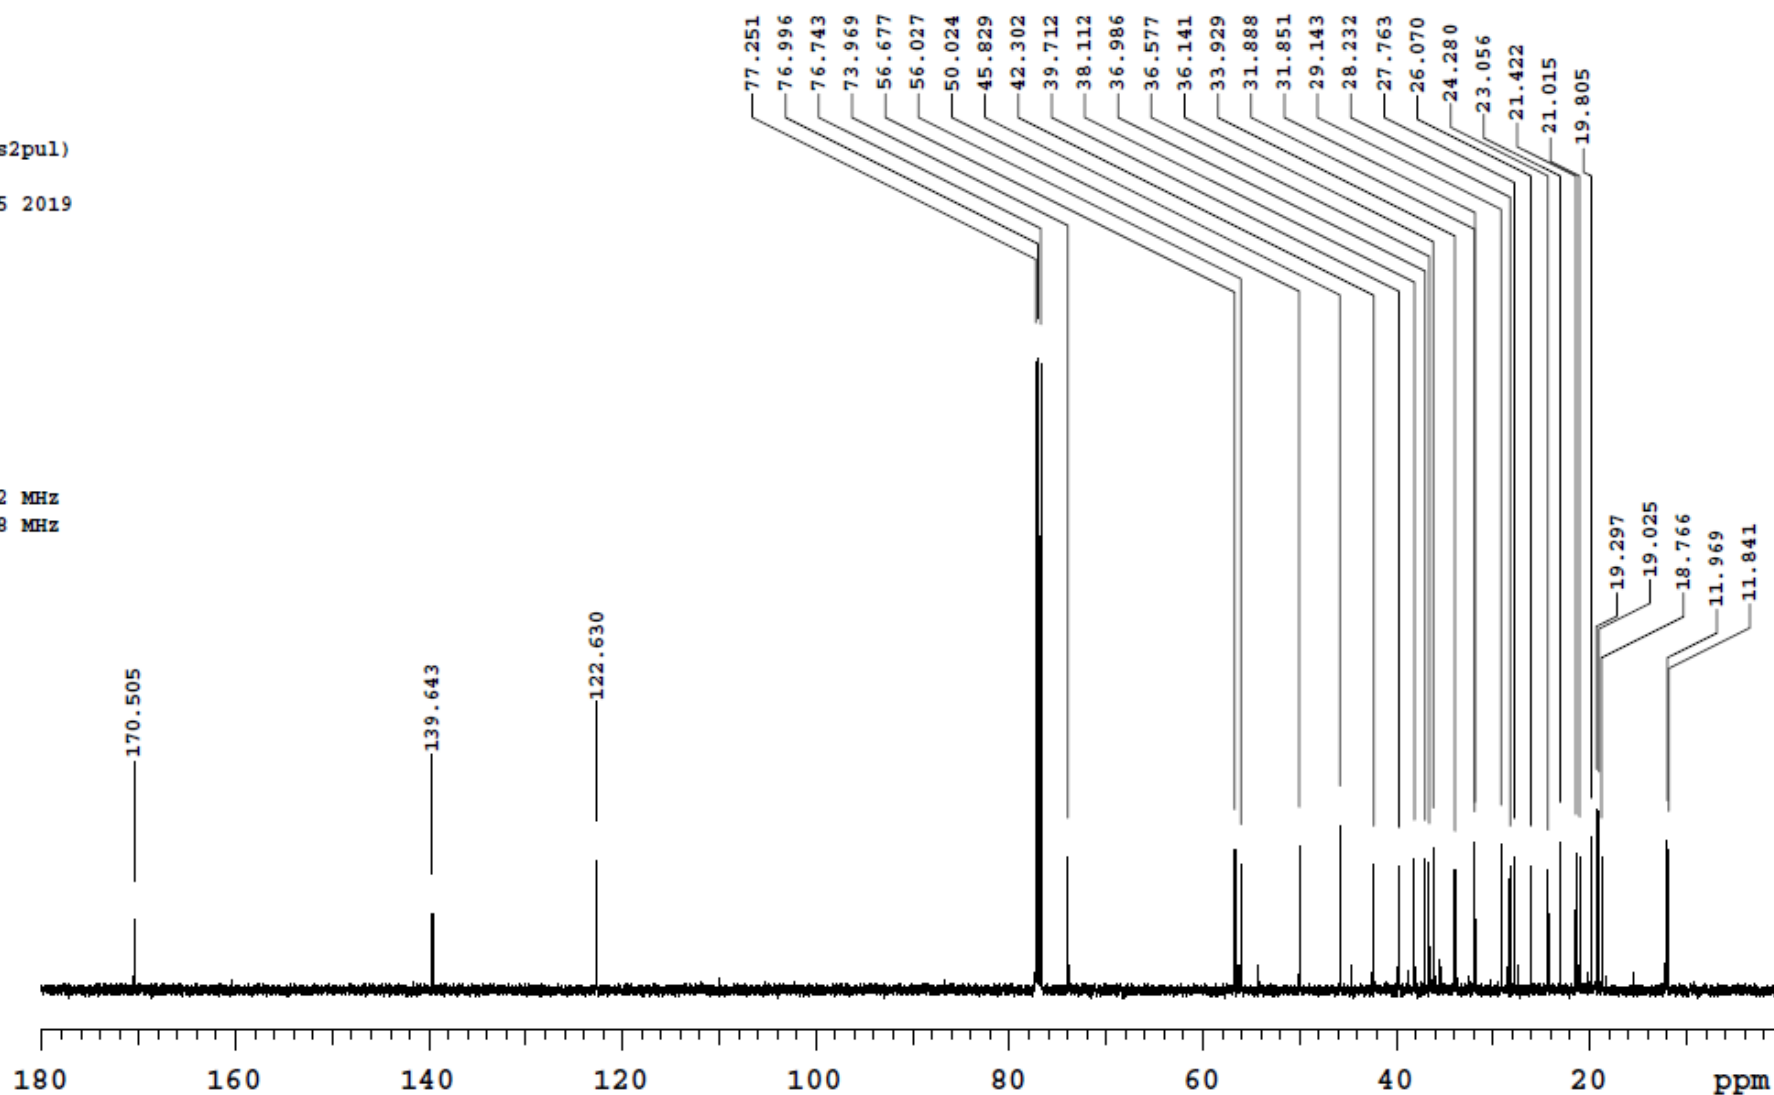

Figure S71.  $^{13}\text{C}$  spectrum of sitost-5-en-3 $\beta$ -yl acetate ( $\beta$ -Sitosteryl acetate) (**23**) in  $\text{CDCl}_3$

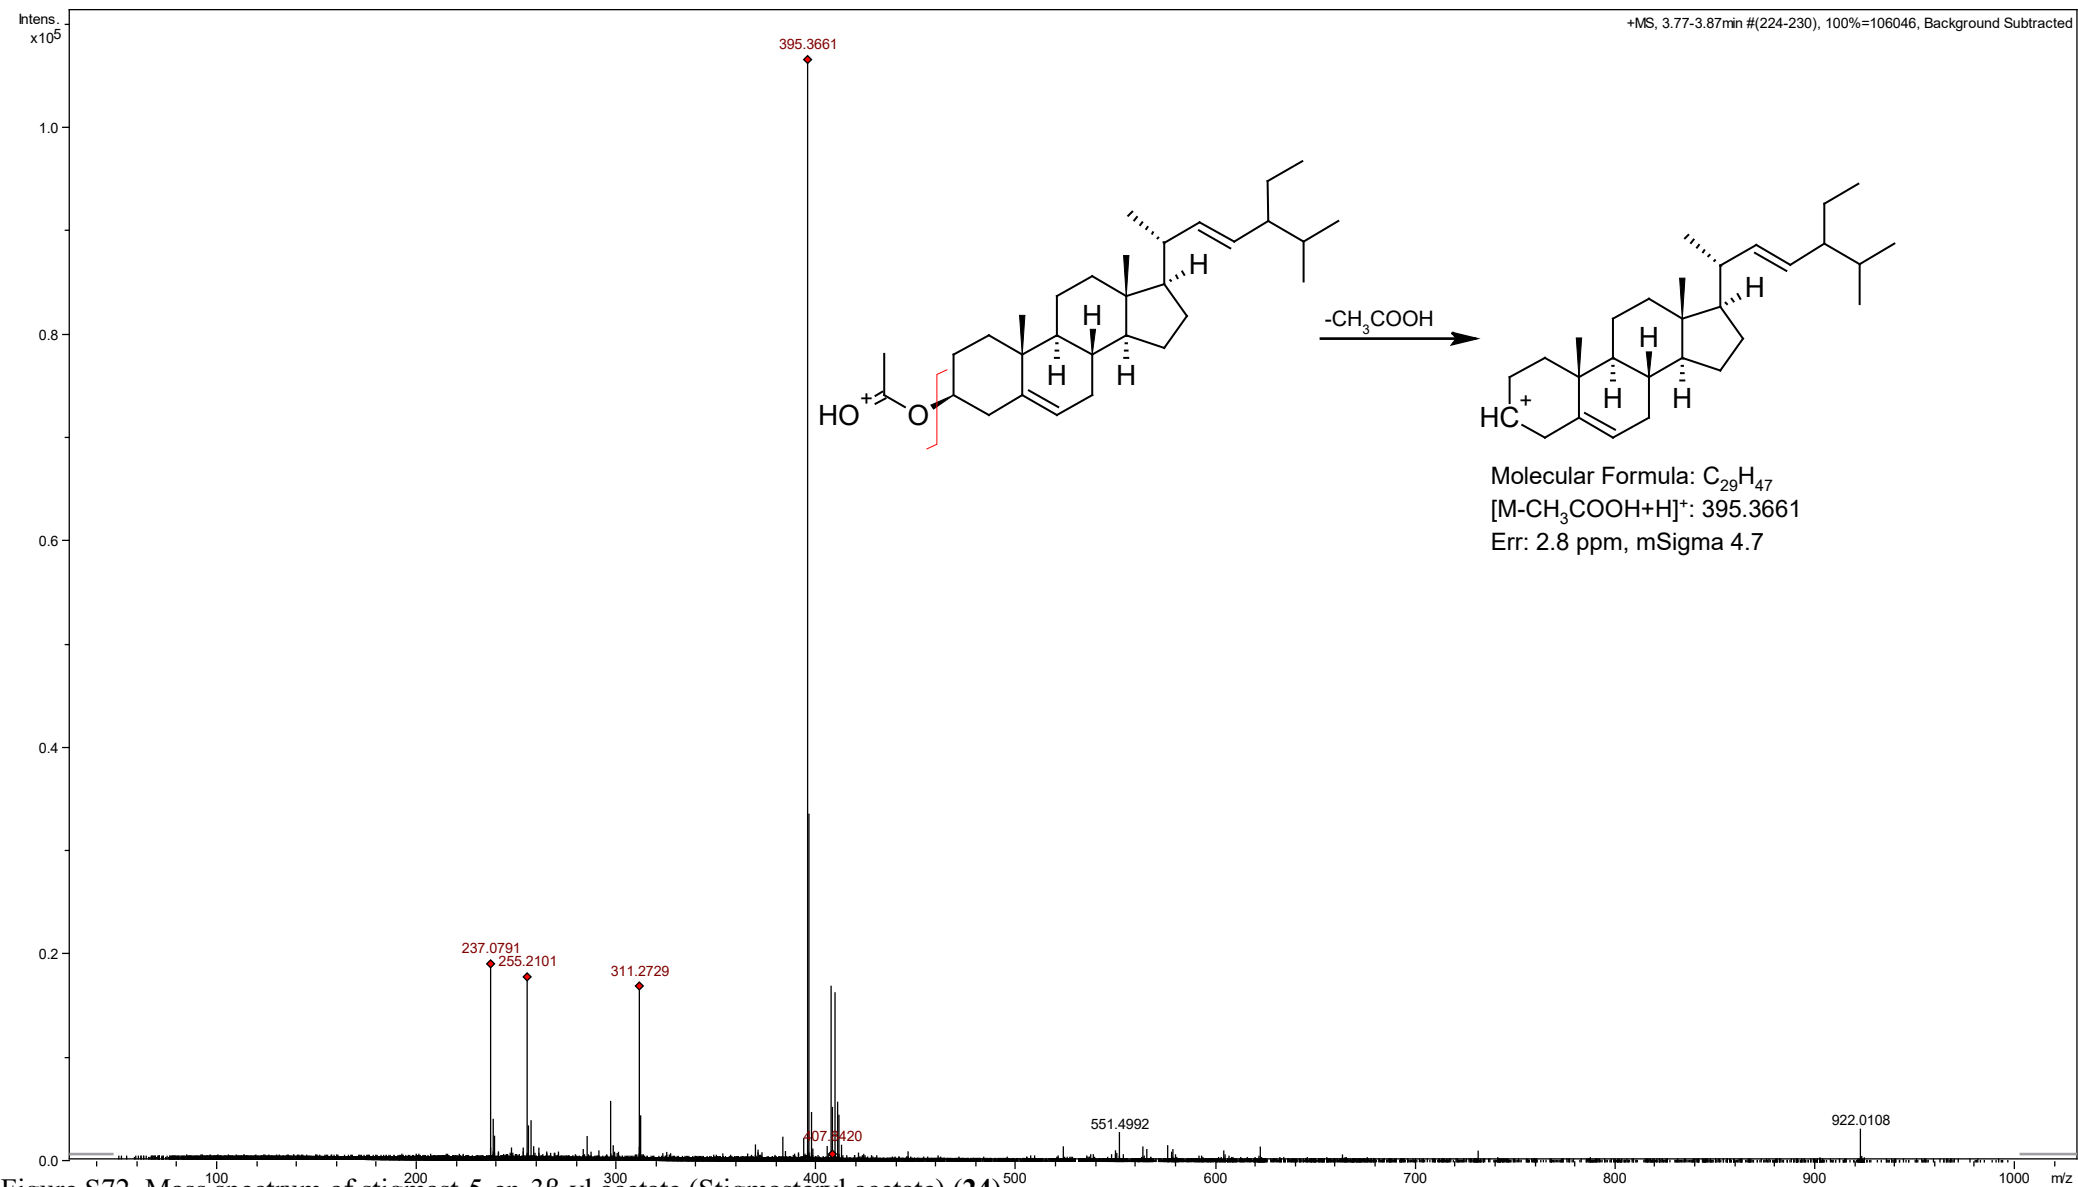

Figure S72. Mass spectrum of stigmaster-5-en-3 $\beta$ -yl acetate (Stigmasteryl acetate) (24)

Pulse Sequence: PROTON (s2pul)  
 Solvent: cdcl3  
 Data collected on: Mar 25 2019

Temp. 25.3 C / 298.4 K  
 Operator: vnmr1

Relax. delay 1.000 sec  
 Pulse 32.1 degrees  
 Acq. time 4.000 sec  
 Width 8012.8 Hz  
 64 repetitions

OBSERVE H1, 499.8026283 MHz

DATA PROCESSING

Line broadening 0.1 Hz  
 FT size 524288  
 Total time 5 min 20 sec

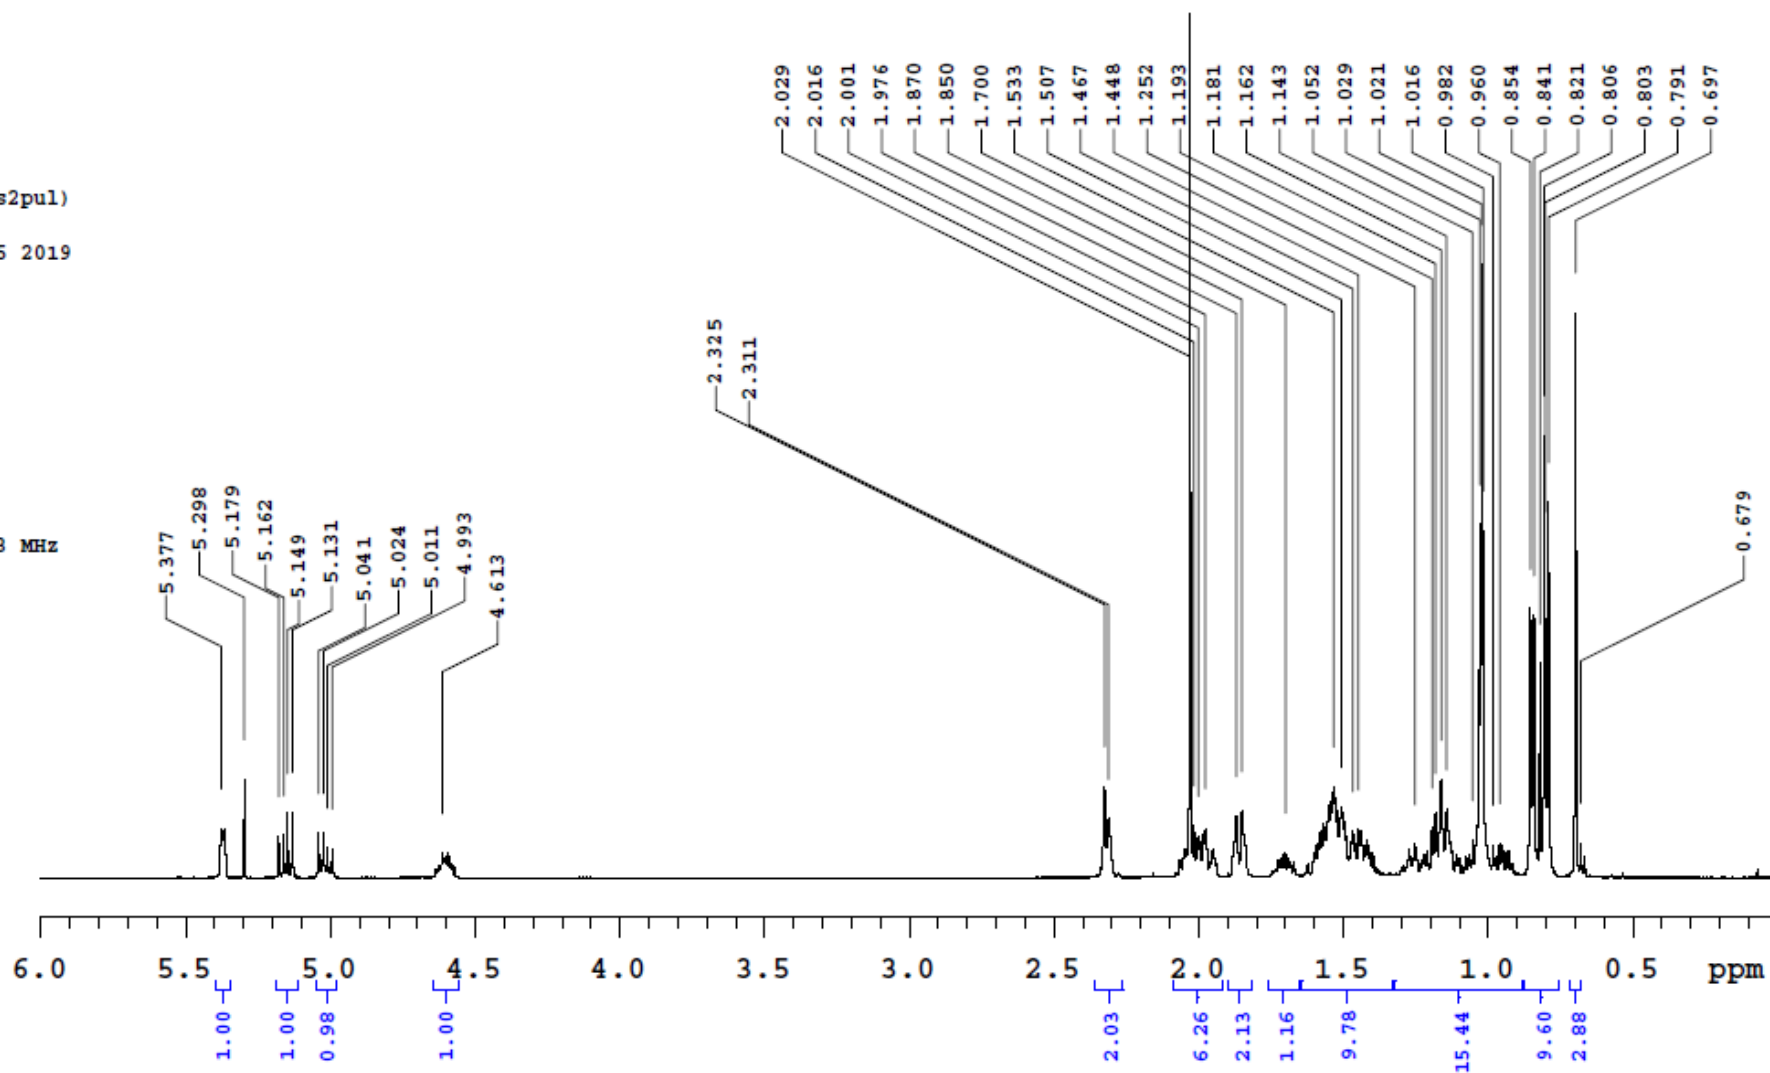

Figure S73. <sup>1</sup>H spectrum of stigmast-5-en-3β-yl acetate (Stigmasteryl acetate) (24) in CDCl<sub>3</sub>

Pulse Sequence: CARBON (s2pul)  
Solvent: cdcl3  
Data collected on: Mar 25 2019

Temp. 25.3 C / 298.4 K  
Operator: vnmr1

Relax. delay 0.500 sec  
Pulse 29.4 degrees  
Acq. time 1.022 sec  
Width 32051.3 Hz  
928 repetitions  
OBSERVE C13, 125.6754712 MHz  
DECOUPLE H1, 499.8051288 MHz  
Power 34 dB  
continuously on  
WALTZ-16 modulated  
DATA PROCESSING  
Line broadening 1.0 Hz  
FT size 262144  
Total time 6 hr, 46 min

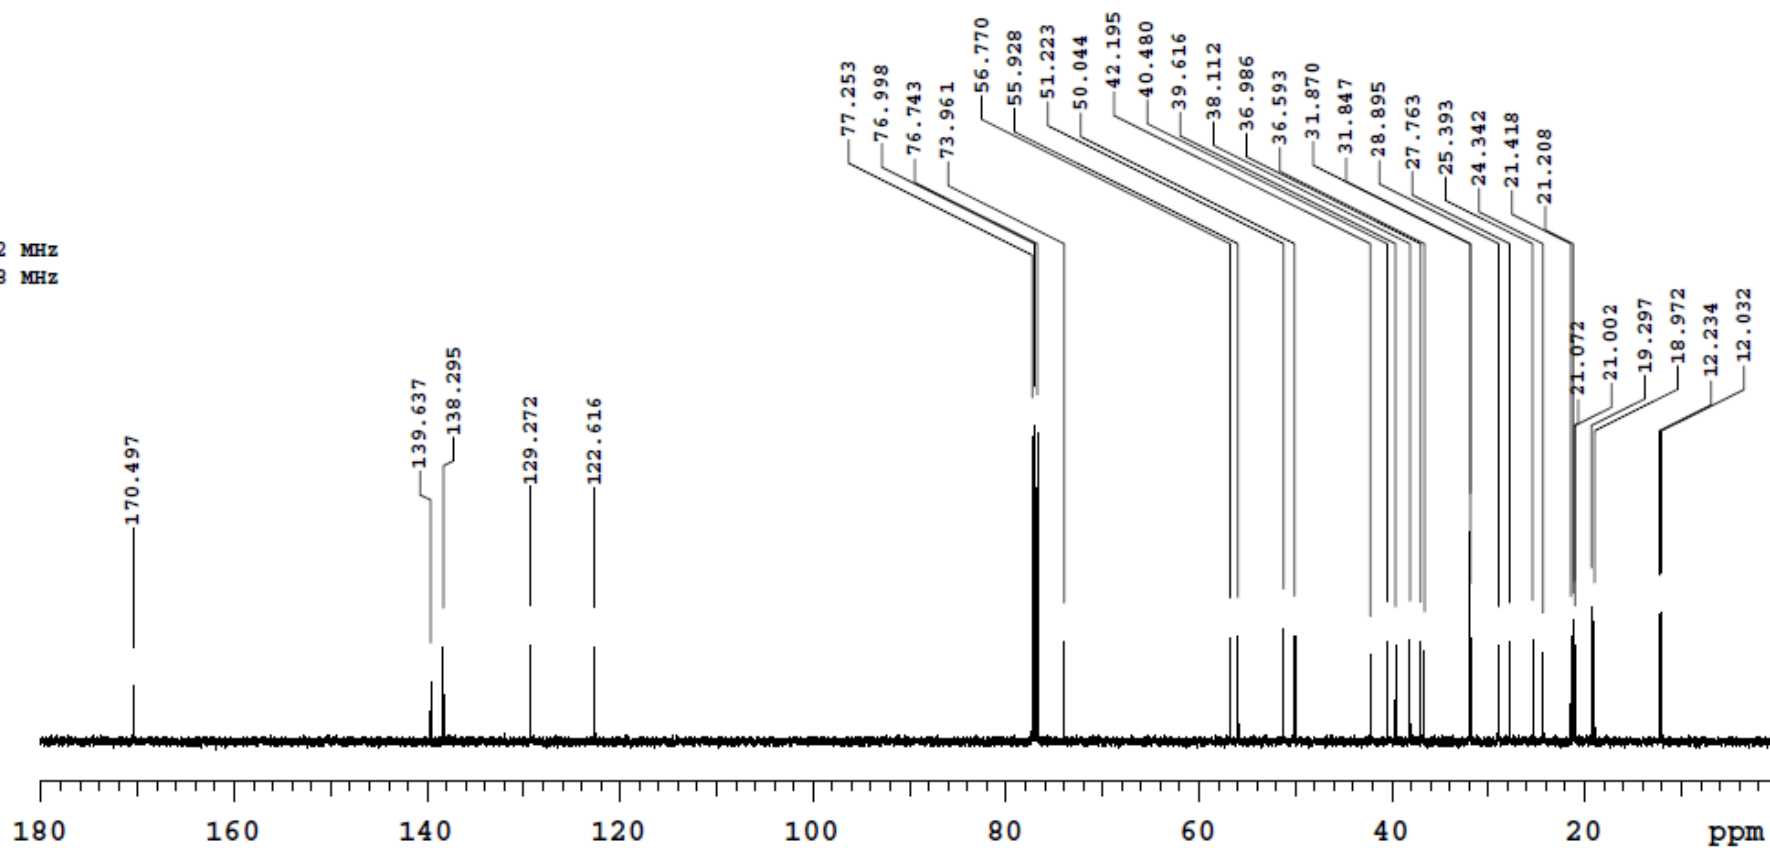

Figure S74. <sup>13</sup>C spectrum of stigmast-5-en-3β-yl acetate (Stigmasteryl acetate) (24) in CDCl<sub>3</sub>



Pulse Sequence: PROTON (s2pul)  
 Solvent: cdcl3  
 Data collected on: Jan 9 2019

Temp. 25.3 C / 298.4 K  
 Operator: vnmr1

Relax. delay 1.000 sec  
 Pulse 31.7 degrees  
 Acq. time 4.000 sec  
 Width 8012.8 Hz  
 64 repetitions

OBSERVE H1, 499.8026298 MHz

DATA PROCESSING

Line broadening 0.1 Hz  
 Gauss apodization 0.800 sec  
 FT size 262144  
 Total time 5 min 20 sec

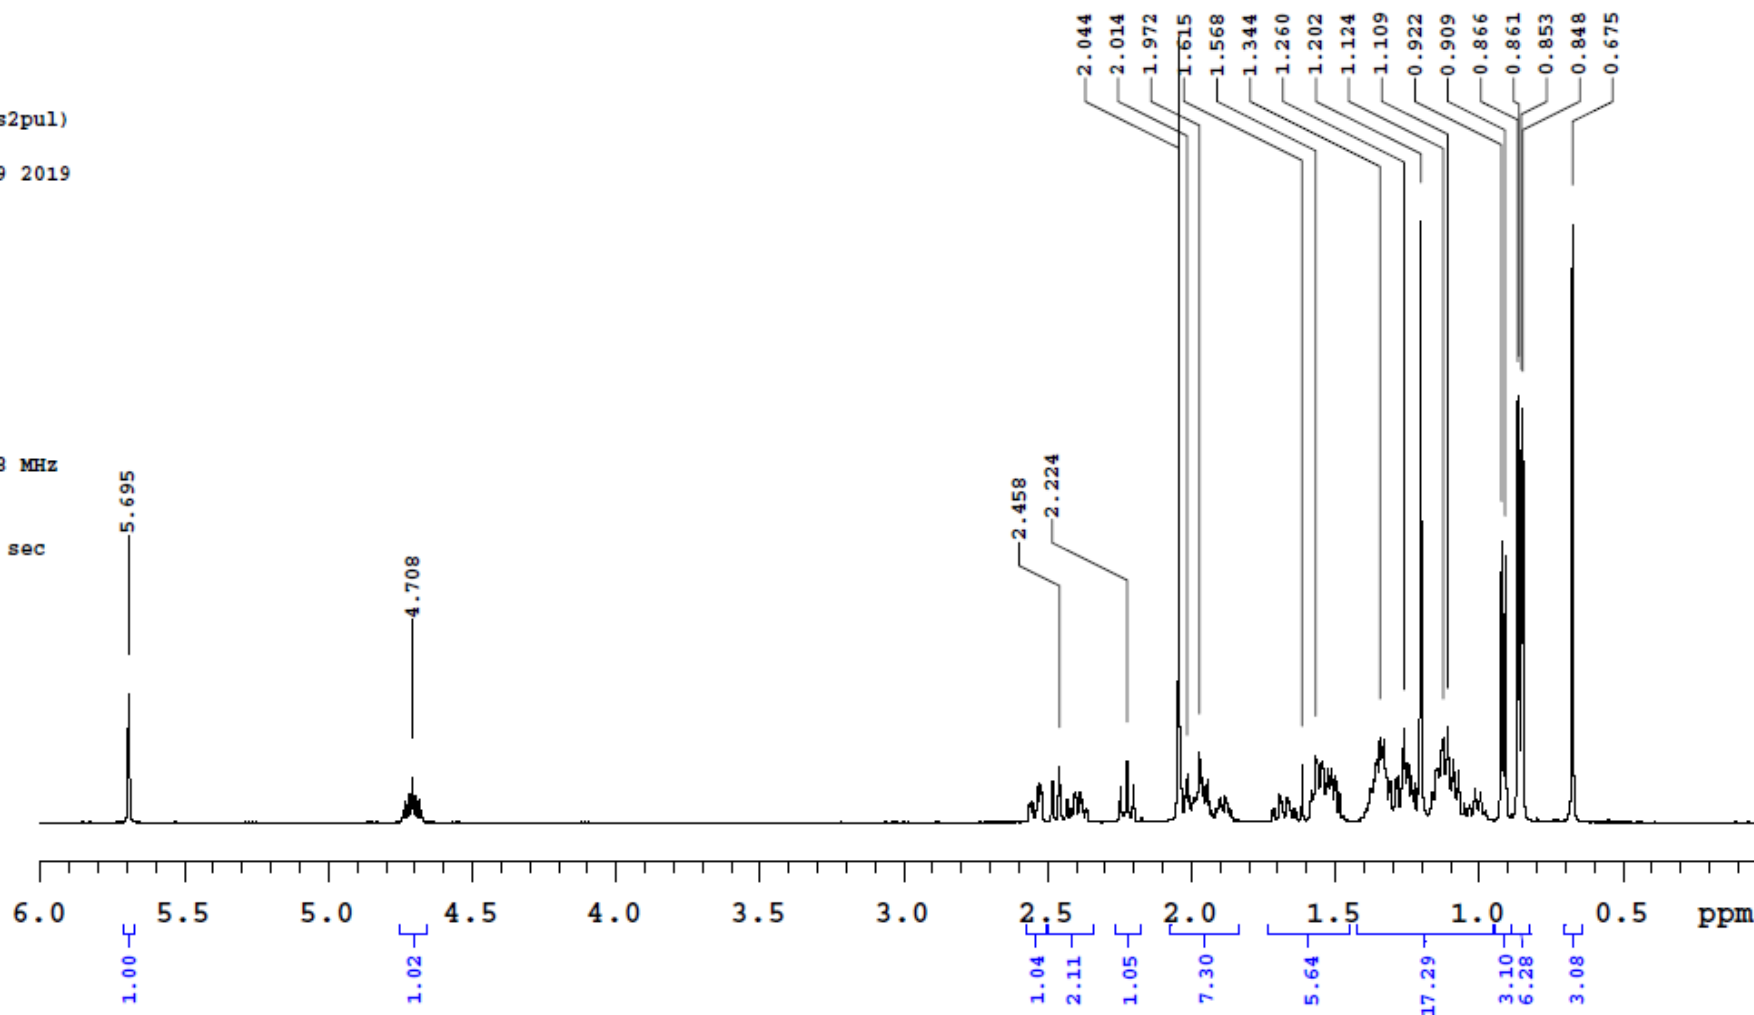

Figure S76. <sup>1</sup>H spectrum of cholest-5-en-7-one-3β-yl acetate (7-ketocholesterol acetate) (**25**) in CDCl<sub>3</sub>

Pulse Sequence: CARBON (s2pul)  
 Solvent: cdcl3  
 Data collected on: Jan 9 2019

Temp. 25.3 C / 298.4 K  
 Operator: vnmr1

Relax. delay 0.500 sec  
 Pulse 25.0 degrees  
 Acq. time 1.200 sec  
 Width 37878.8 Hz  
 424 repetitions

OBSERVE C13, 125.6754712 MHz  
 DECOUPLE H1, 499.8051288 MHz  
 Power 34 dB  
 continuously on  
 WALTZ-16 modulated

DATA PROCESSING  
 Line broadening 1.0 Hz  
 FT size 262144  
 Total time 18 hr, 53 min

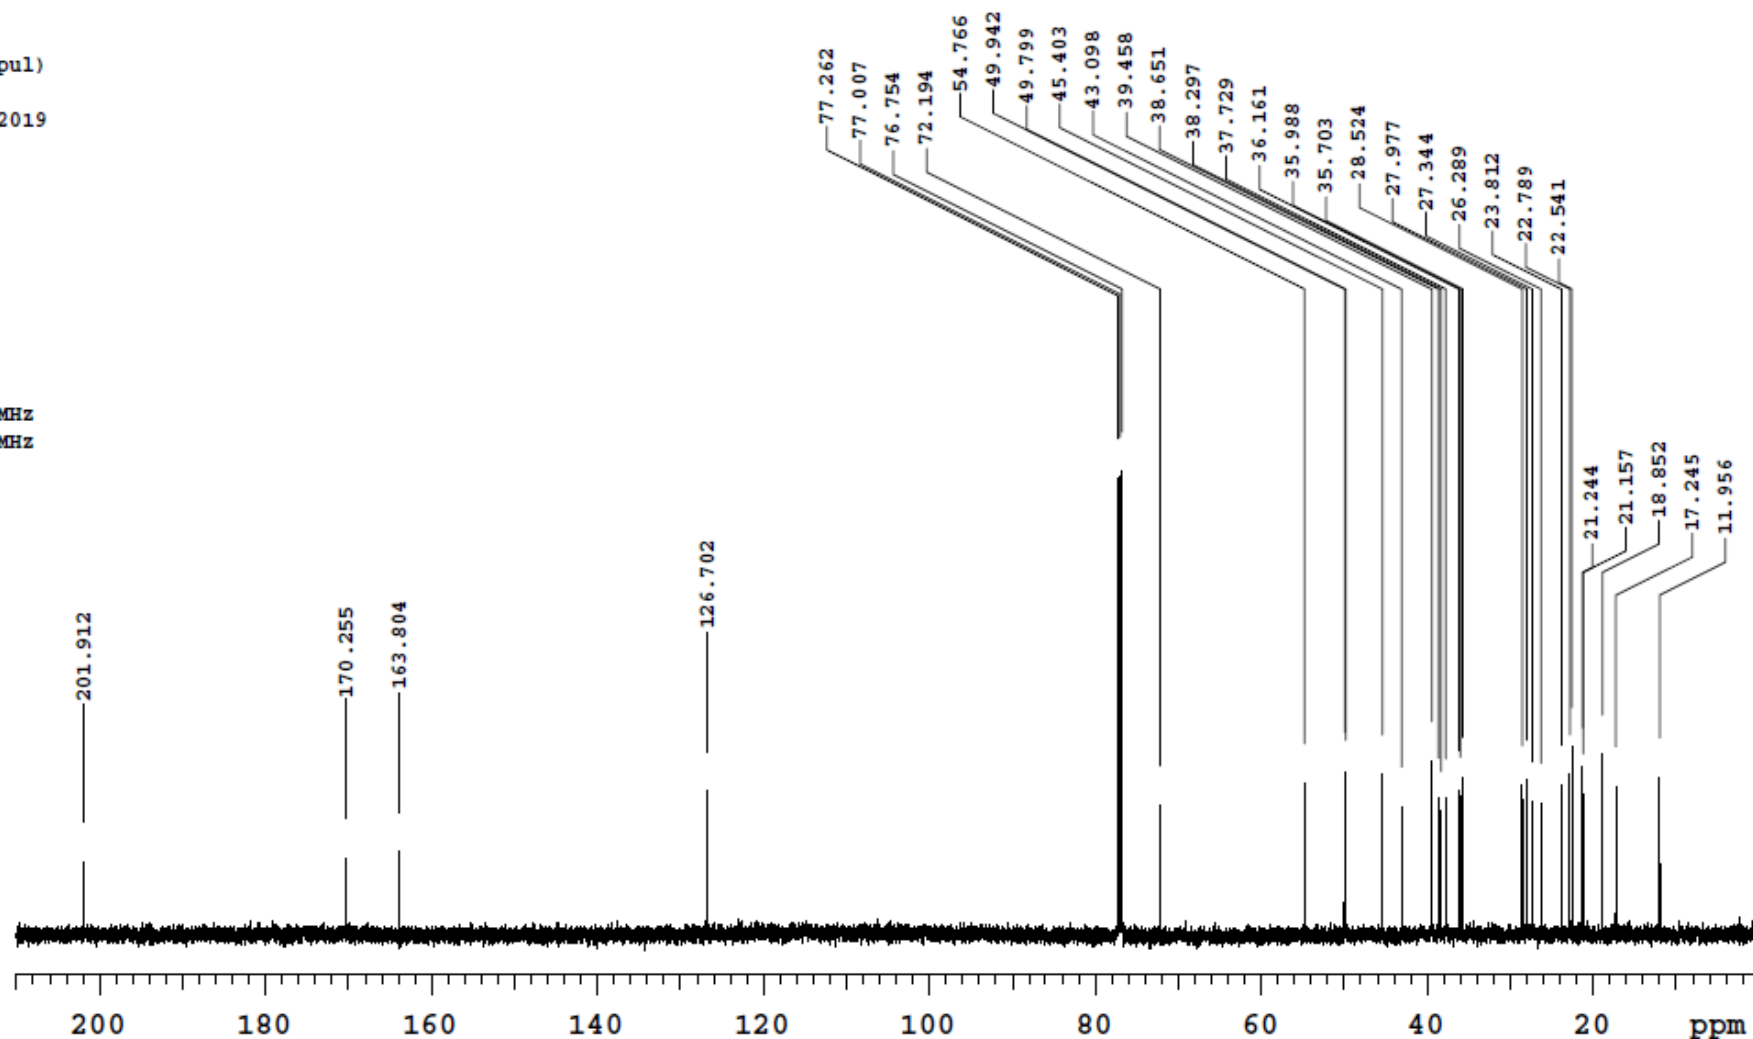

Figure S77. <sup>13</sup>C spectrum of cholest-5-en-7-one-3β-yl acetate (7-ketocholesterol acetate) (25) in CDCl<sub>3</sub>

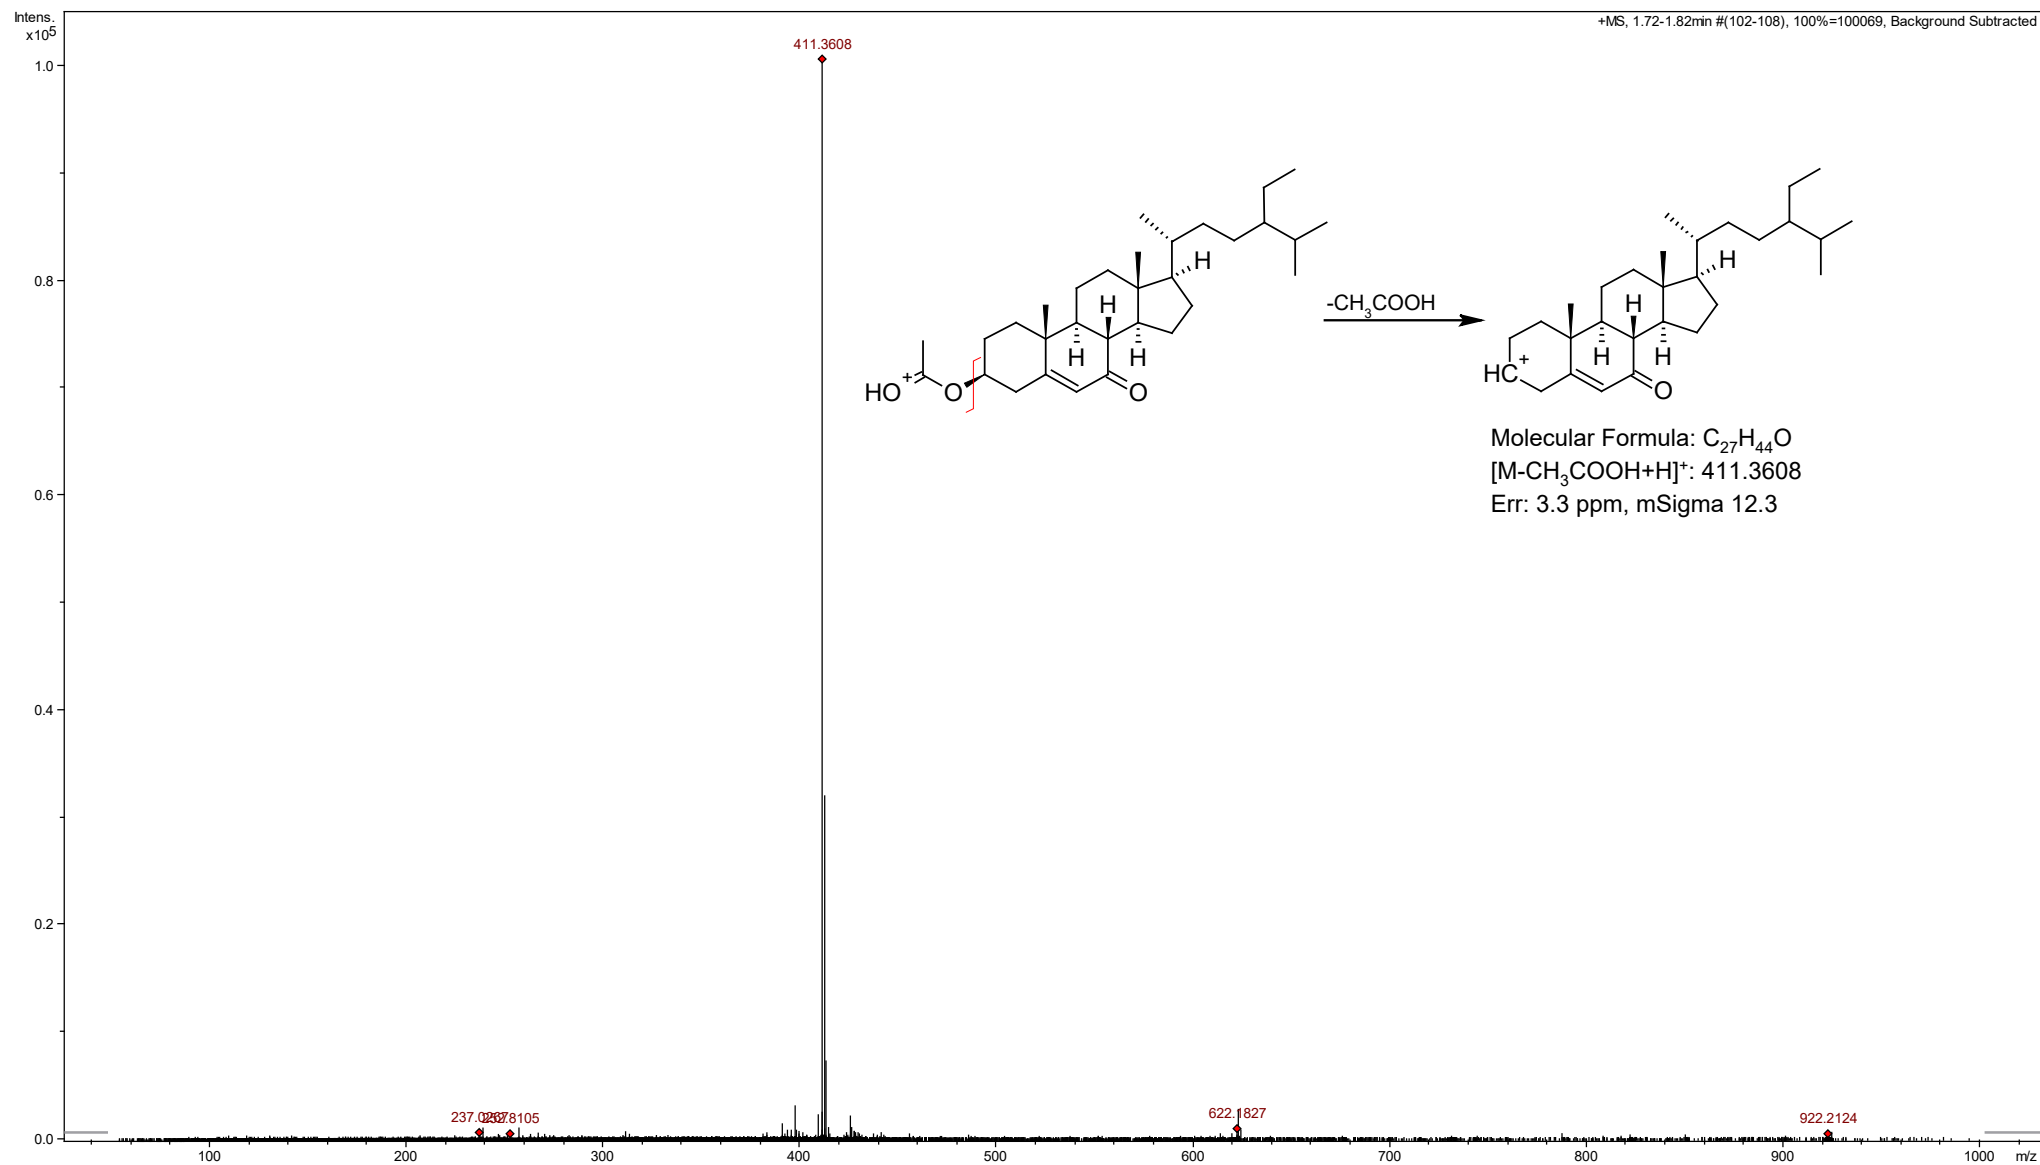

Figure S78. Mass spectrum of sitost-5-en-7-one-3 $\beta$ -yl acetate (7-ketositosteryl acetate) (**26**)

Pulse Sequence: PROTON (s2pul)  
 Solvent: cdcl3  
 Data collected on: Mar 29 2019

Temp. 25.3 C / 298.4 K  
 Operator: vnmr1

Relax. delay 1.000 sec  
 Pulse 31.7 degrees  
 Acq. time 4.000 sec  
 Width 8012.8 Hz  
 64 repetitions  
 OBSERVE H1, 499.8026266 MHz  
 DATA PROCESSING  
 Line broadening 0.1 Hz  
 FT size 524288  
 Total time 5 min 20 sec

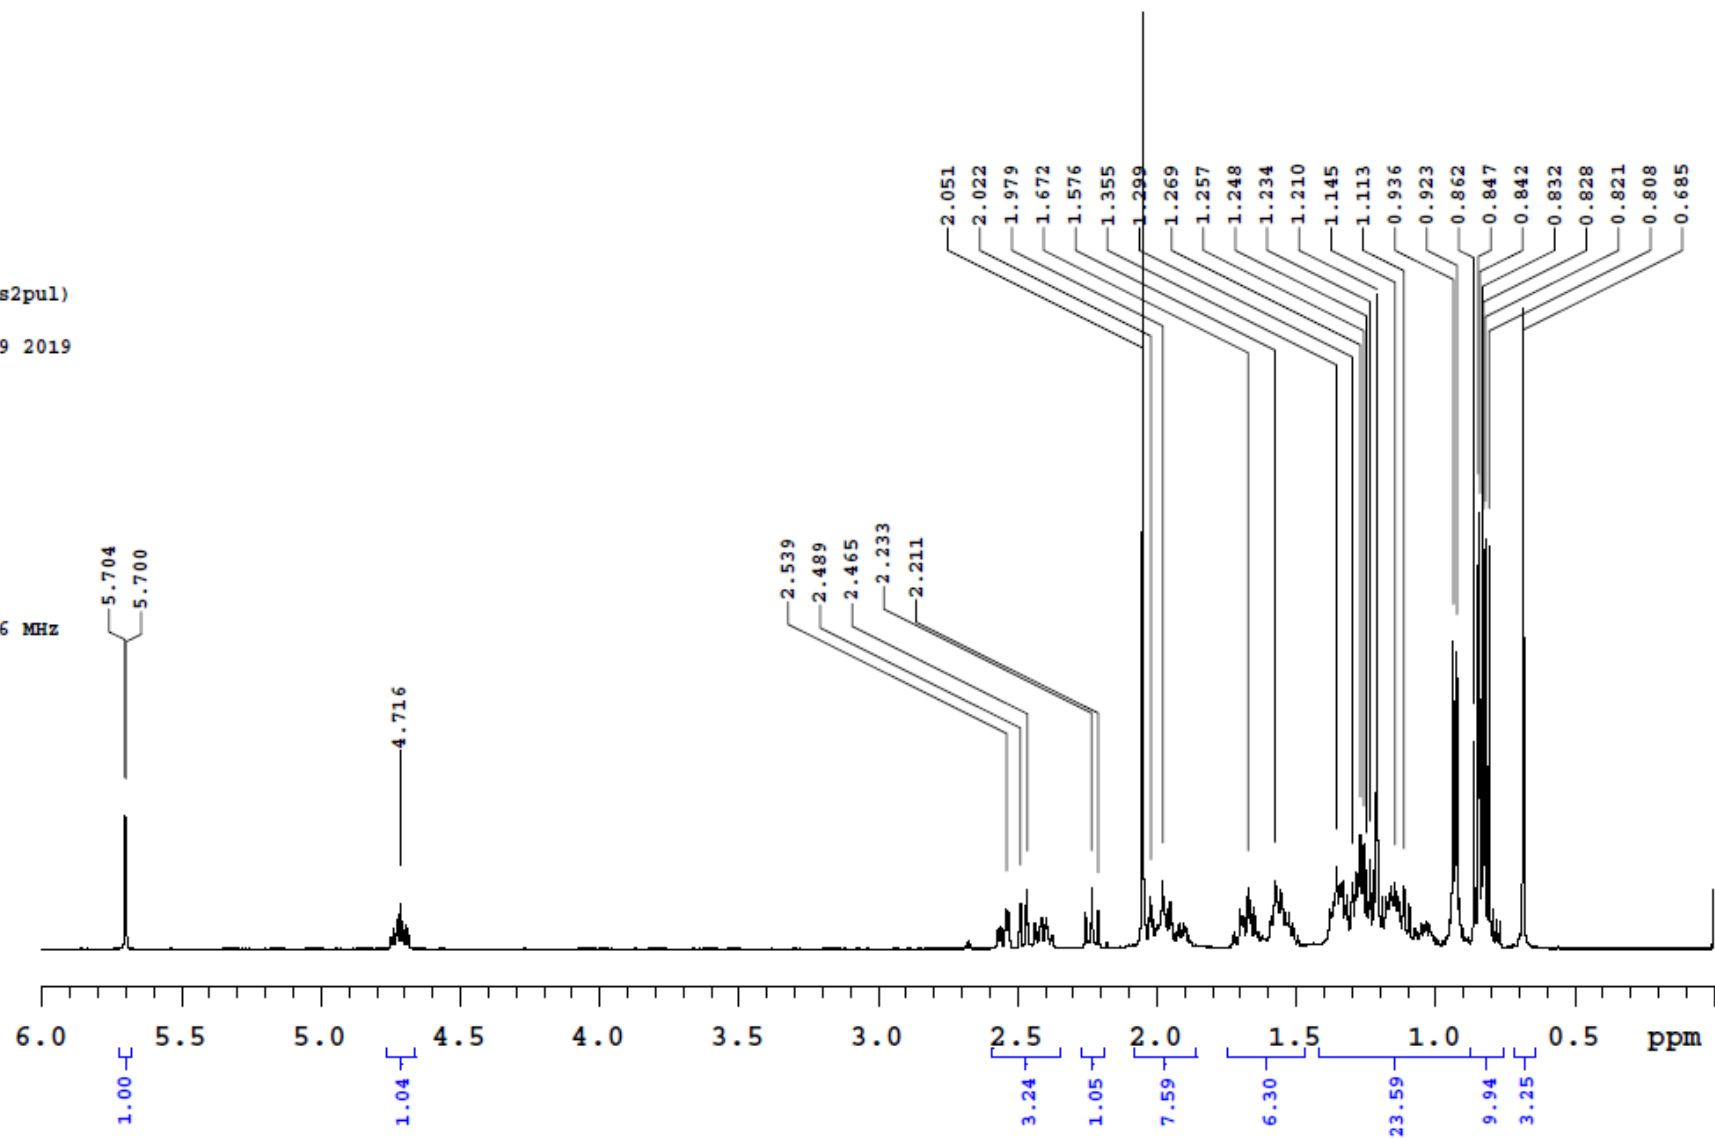

Figure S79. <sup>1</sup>H spectrum of sitost-5-en-7-one-3β-yl acetate (7-ketositosteryl acetate) (26) in CDCl<sub>3</sub>

Pulse Sequence: CARBON (s2pul)  
 Solvent: cdcl3  
 Data collected on: Mar 29 2019

Temp. 25.3 C / 298.4 K  
 Operator: vnmr1

Relax. delay 0.500 sec  
 Pulse 29.4 degrees  
 Acq. time 1.022 sec  
 Width 32051.3 Hz  
 384 repetitions  
 OBSERVE C13, 125.6754712 MHz  
 DECOUPLE H1, 499.8051288 MHz  
 Power 34 dB  
 continuously on  
 WALTZ-16 modulated  
 DATA PROCESSING  
 Line broadening 1.0 Hz  
 FT size 262144  
 Total time 1 hr, 44 min

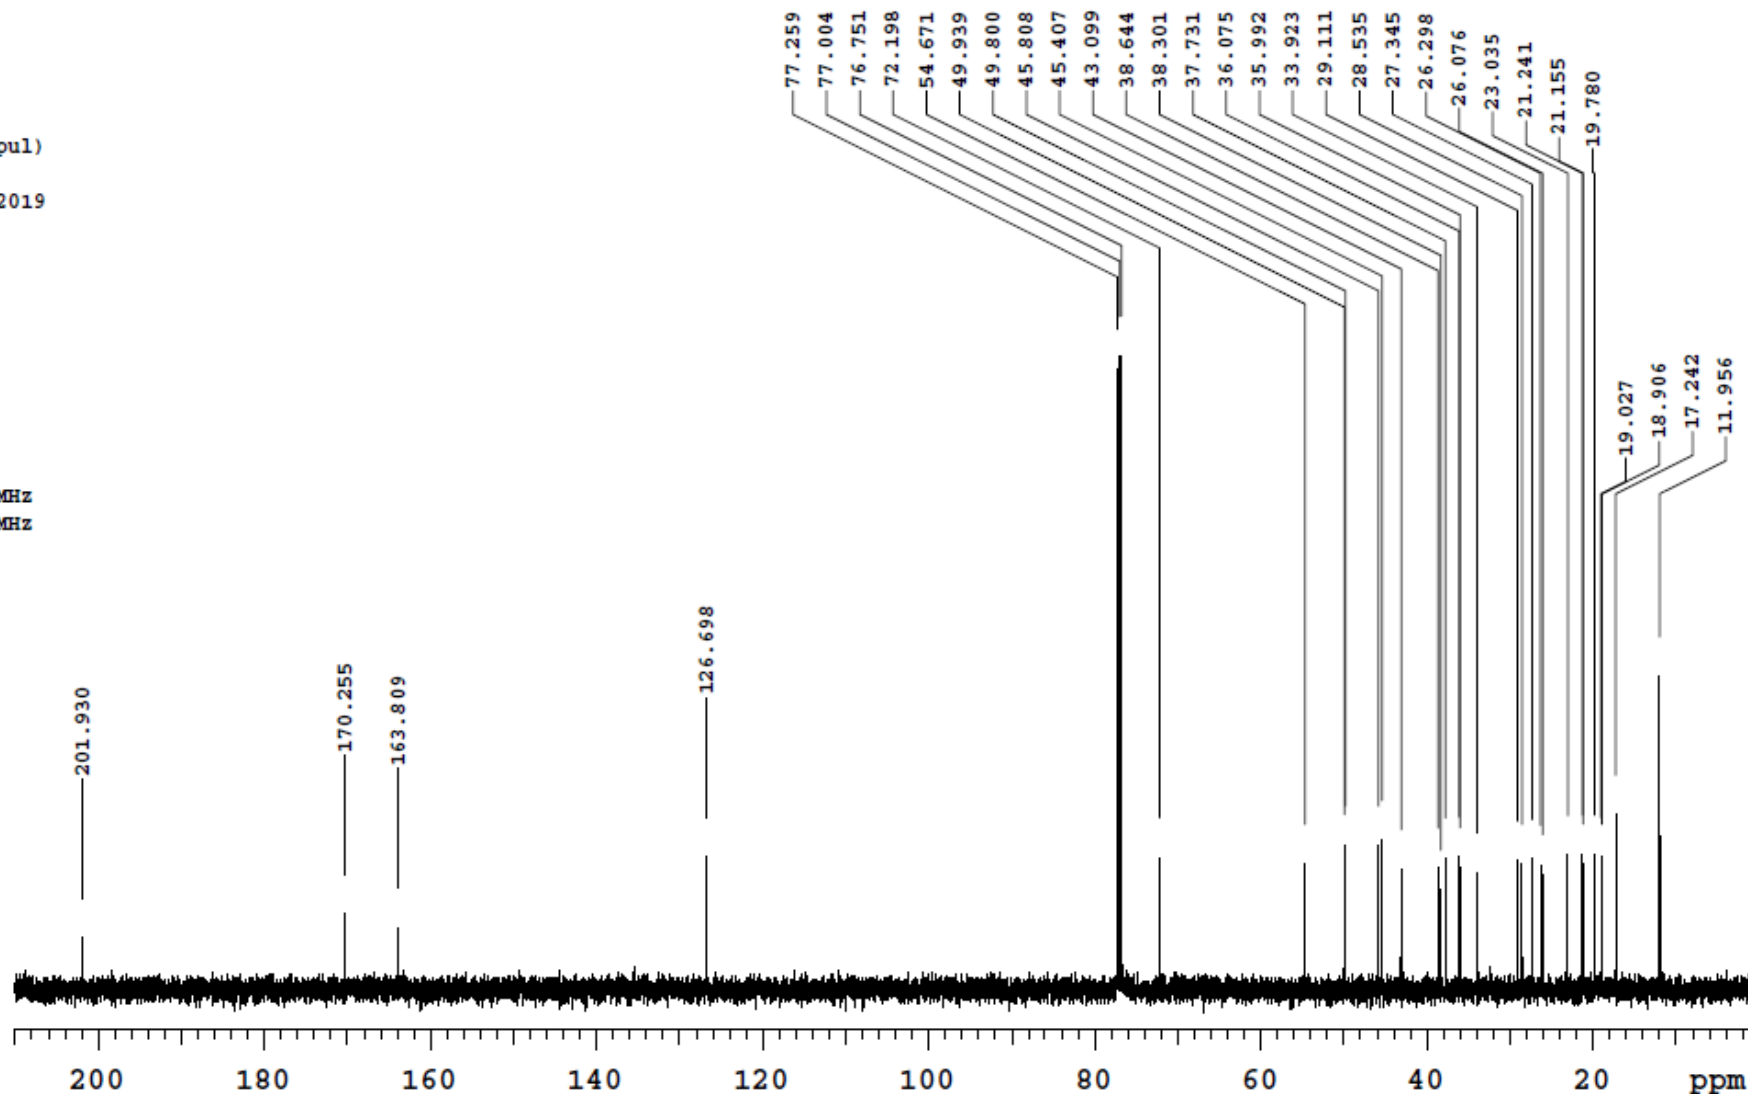

Figure S80. <sup>13</sup>C spectrum of sitost-5-en-7-one-3β-yl acetate (7-ketositosteryl acetate) (**26**) in CDCl<sub>3</sub>

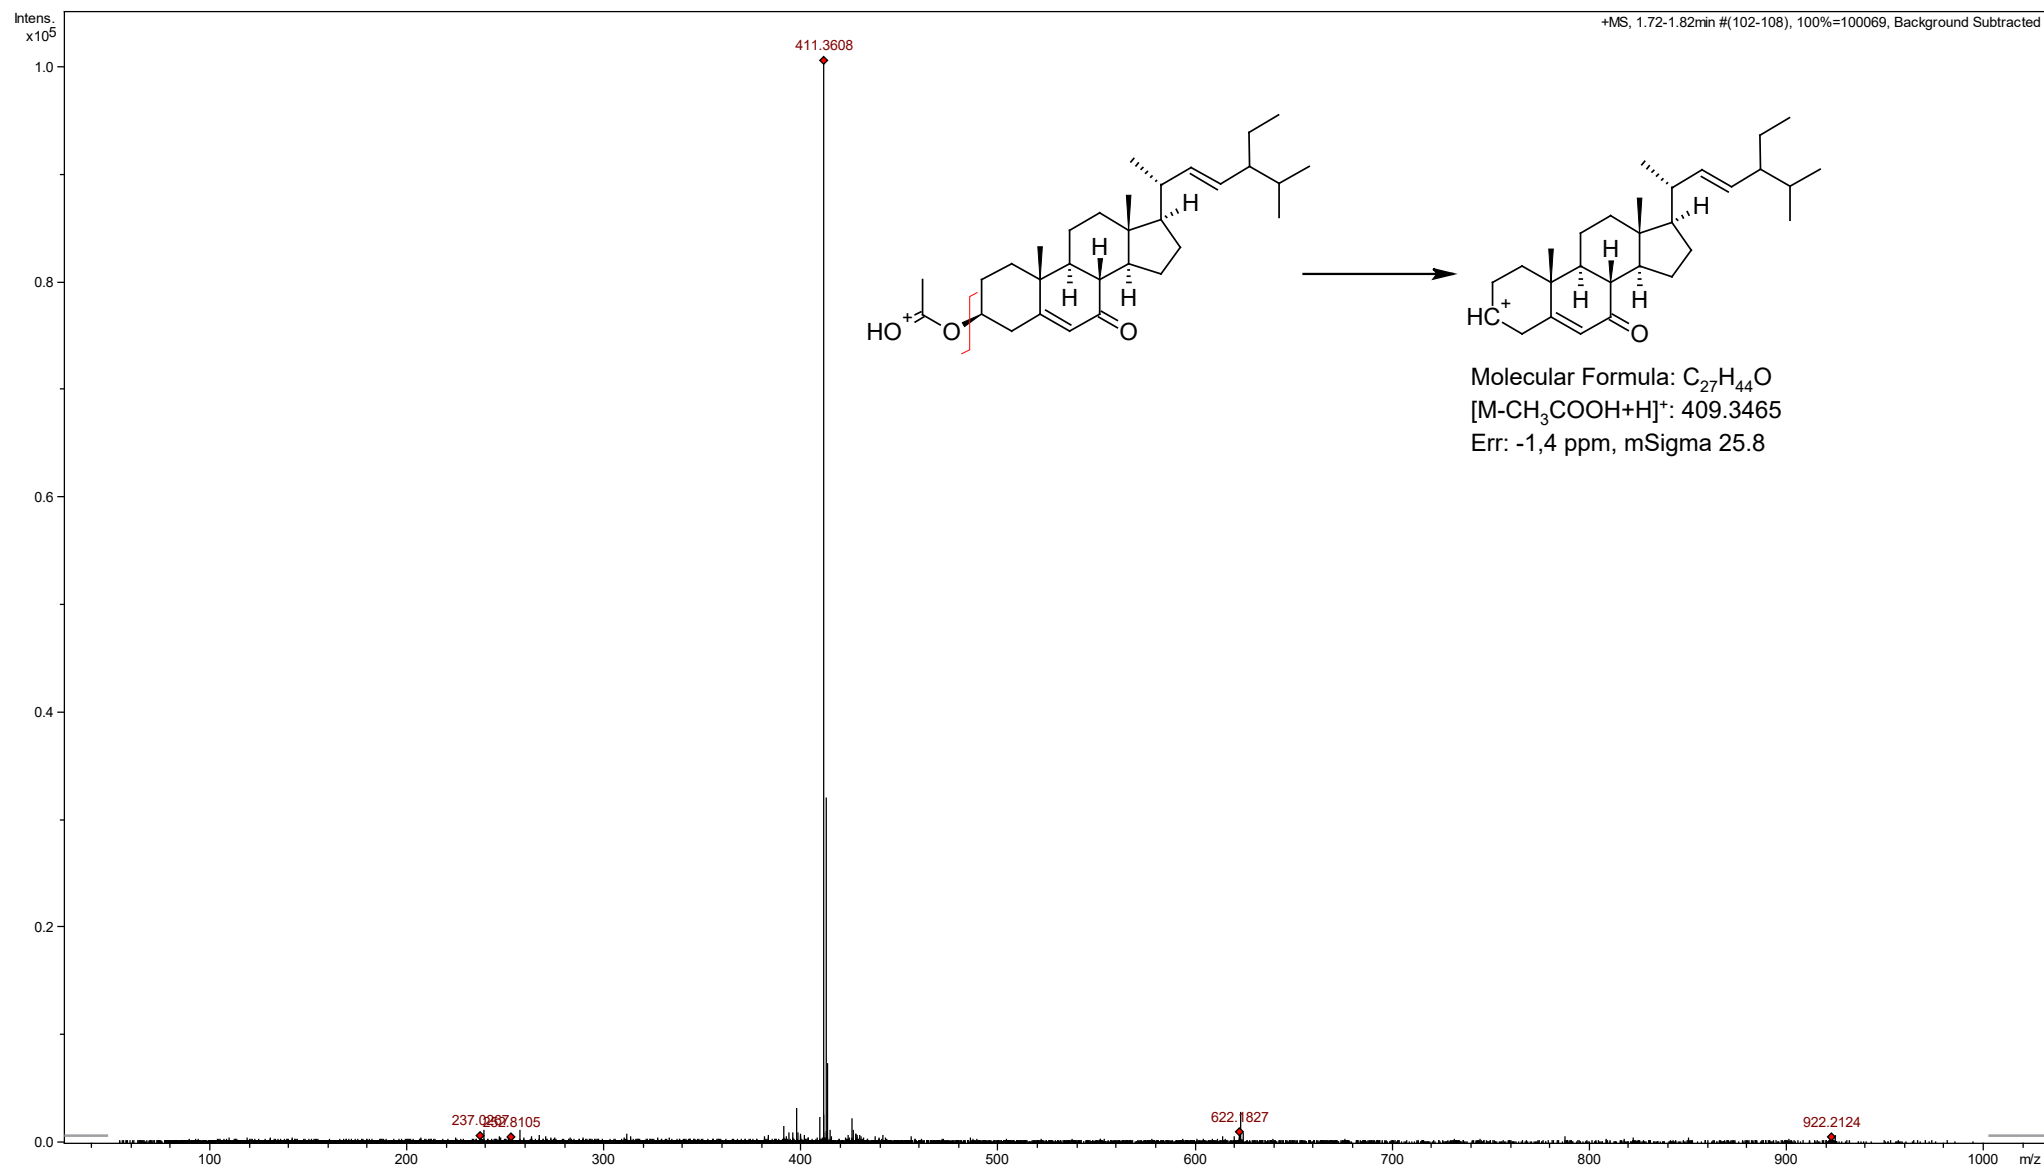

Figure S81. Mass spectrum of stigmast-5-en-7-one-3 $\beta$ -yl acetate (7-ketostigmasteryl acetate) (**27**)

Pulse Sequence: PROTON (s2pul)  
 Solvent: cdcl3  
 Data collected on: Mar 25 2019

Temp. 25.3 C / 298.4 K  
 Operator: vnmr1

Relax. delay 1.000 sec  
 Pulse 31.2 degrees  
 Acq. time 4.000 sec  
 Width 8012.8 Hz  
 64 repetitions

OBSERVE H1, 499.8026267 MHz  
 DATA PROCESSING  
 Line broadening 0.1 Hz  
 FT size 524288  
 Total time 5 min 20 sec

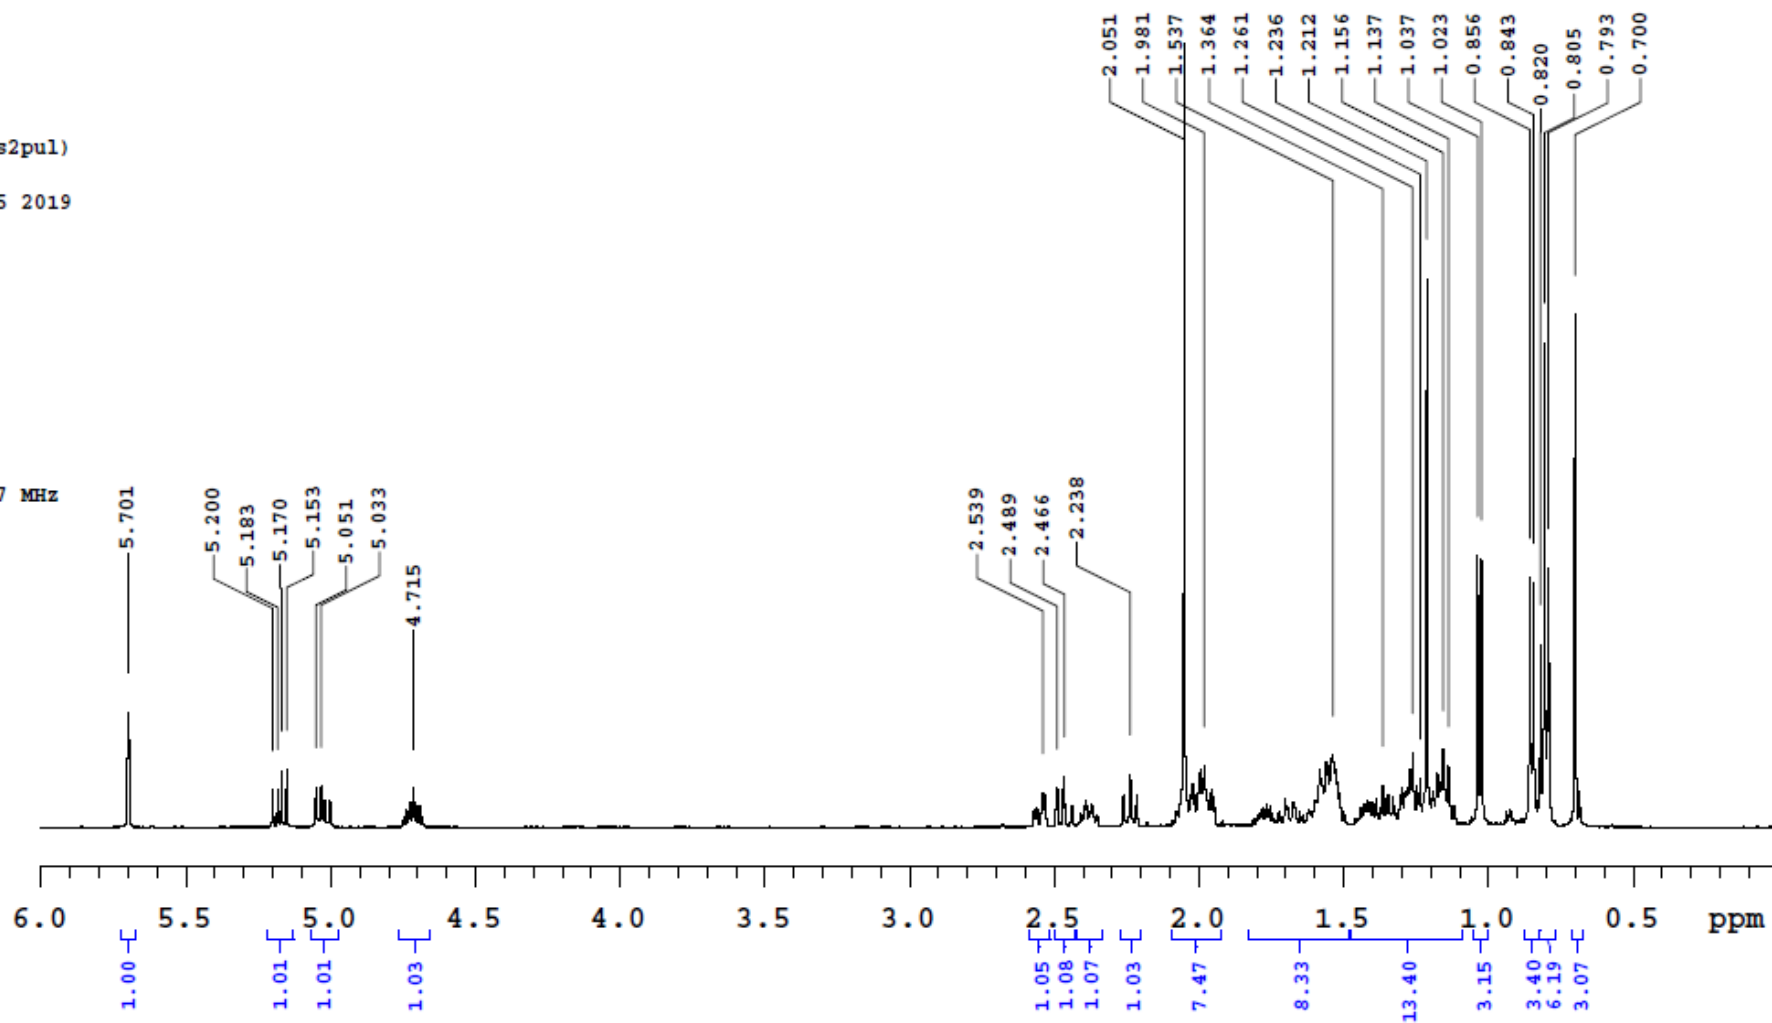

Figure S82. <sup>1</sup>H spectrum of stigmast-5-en-7-one-3β-yl acetate (7-ketostigmasteryl acetate) (27) in CDCl<sub>3</sub>

Pulse Sequence: CARBON (s2pul)  
 Solvent: cdcl3  
 Data collected on: Mar 25 2019

Temp. 25.3 C / 298.4 K  
 Operator: vnmr1

Relax. delay 0.500 sec  
 Pulse 29.4 degrees  
 Acq. time 1.022 sec  
 Width 32051.3 Hz  
 4096 repetitions

OBSERVE C13, 125.6754712 MHz  
 DECOUPLE H1, 499.8051288 MHz

Power 34 dB  
 continuously on  
 WALTZ-16 modulated  
 DATA PROCESSING  
 Line broadening 1.0 Hz  
 FT size 262144  
 Total time 1 hr, 44 min

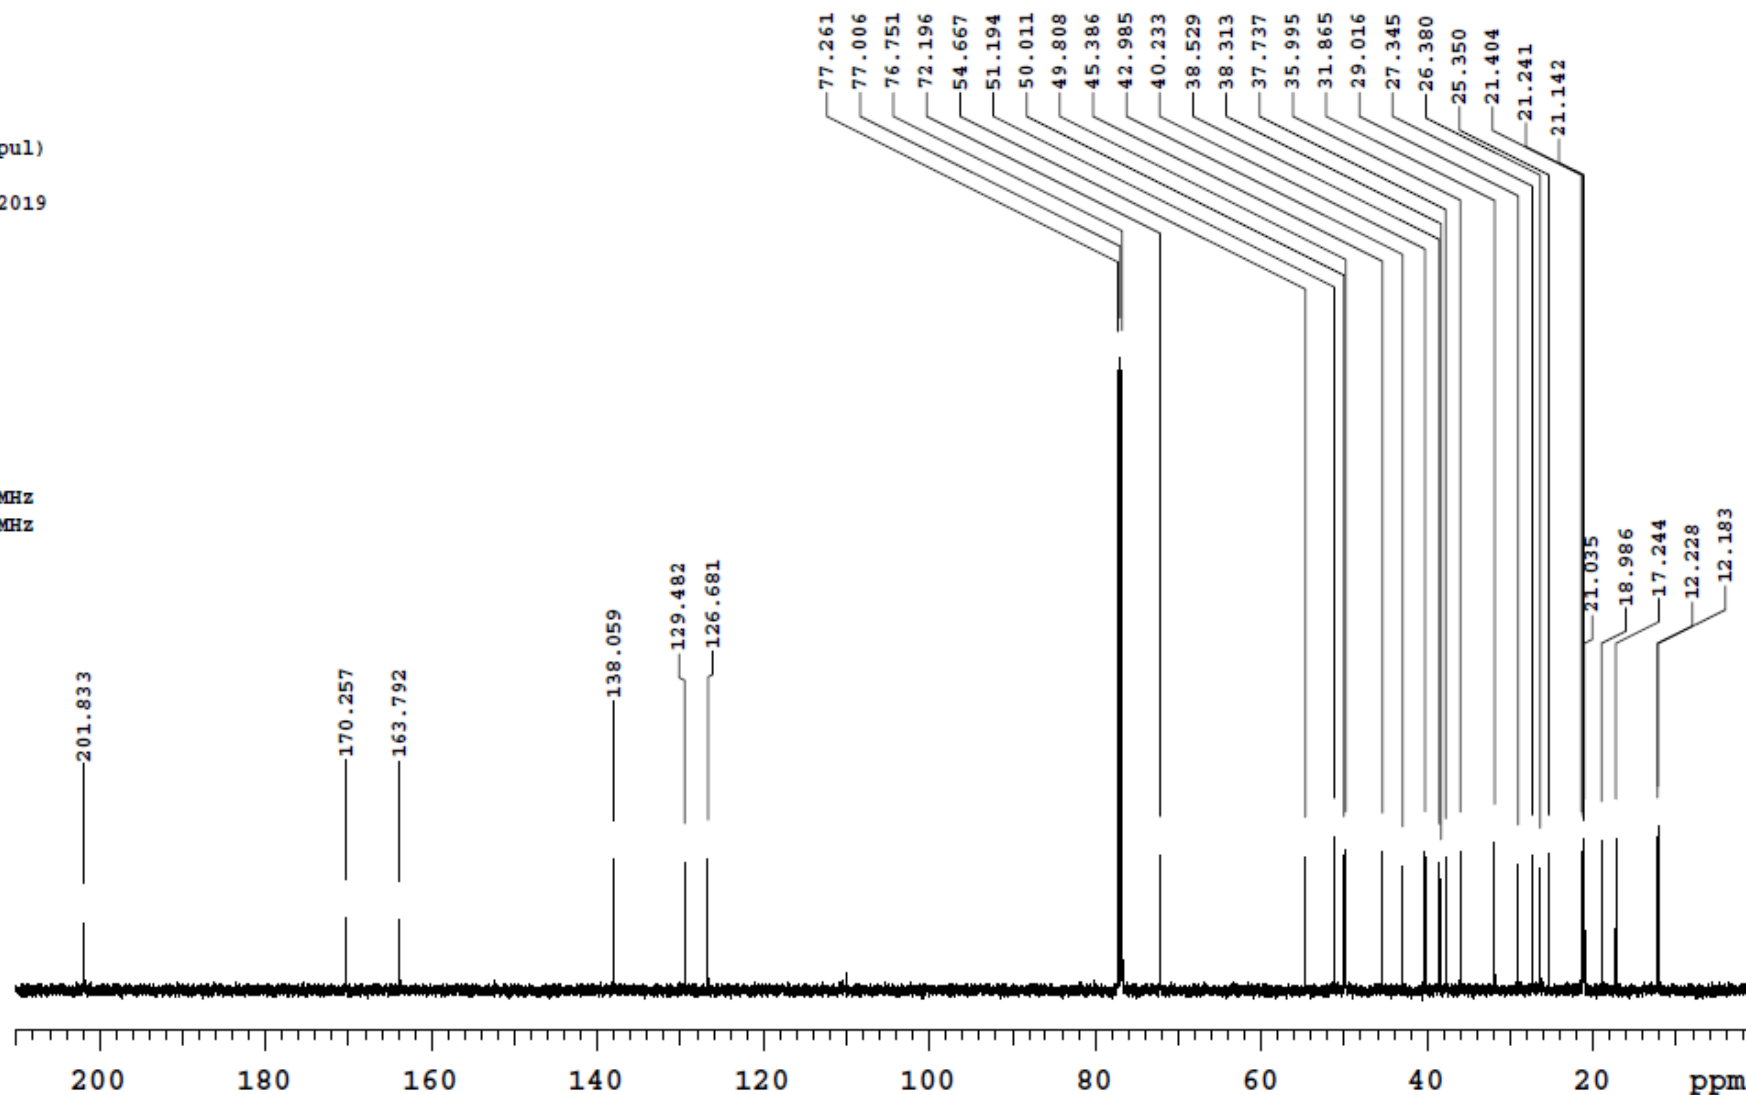

Figure S83. <sup>13</sup>C spectrum of stigmast-5-en-7-one-3β-yl acetate (7-ketostigmasteryl acetate) (27) in CDCl<sub>3</sub>

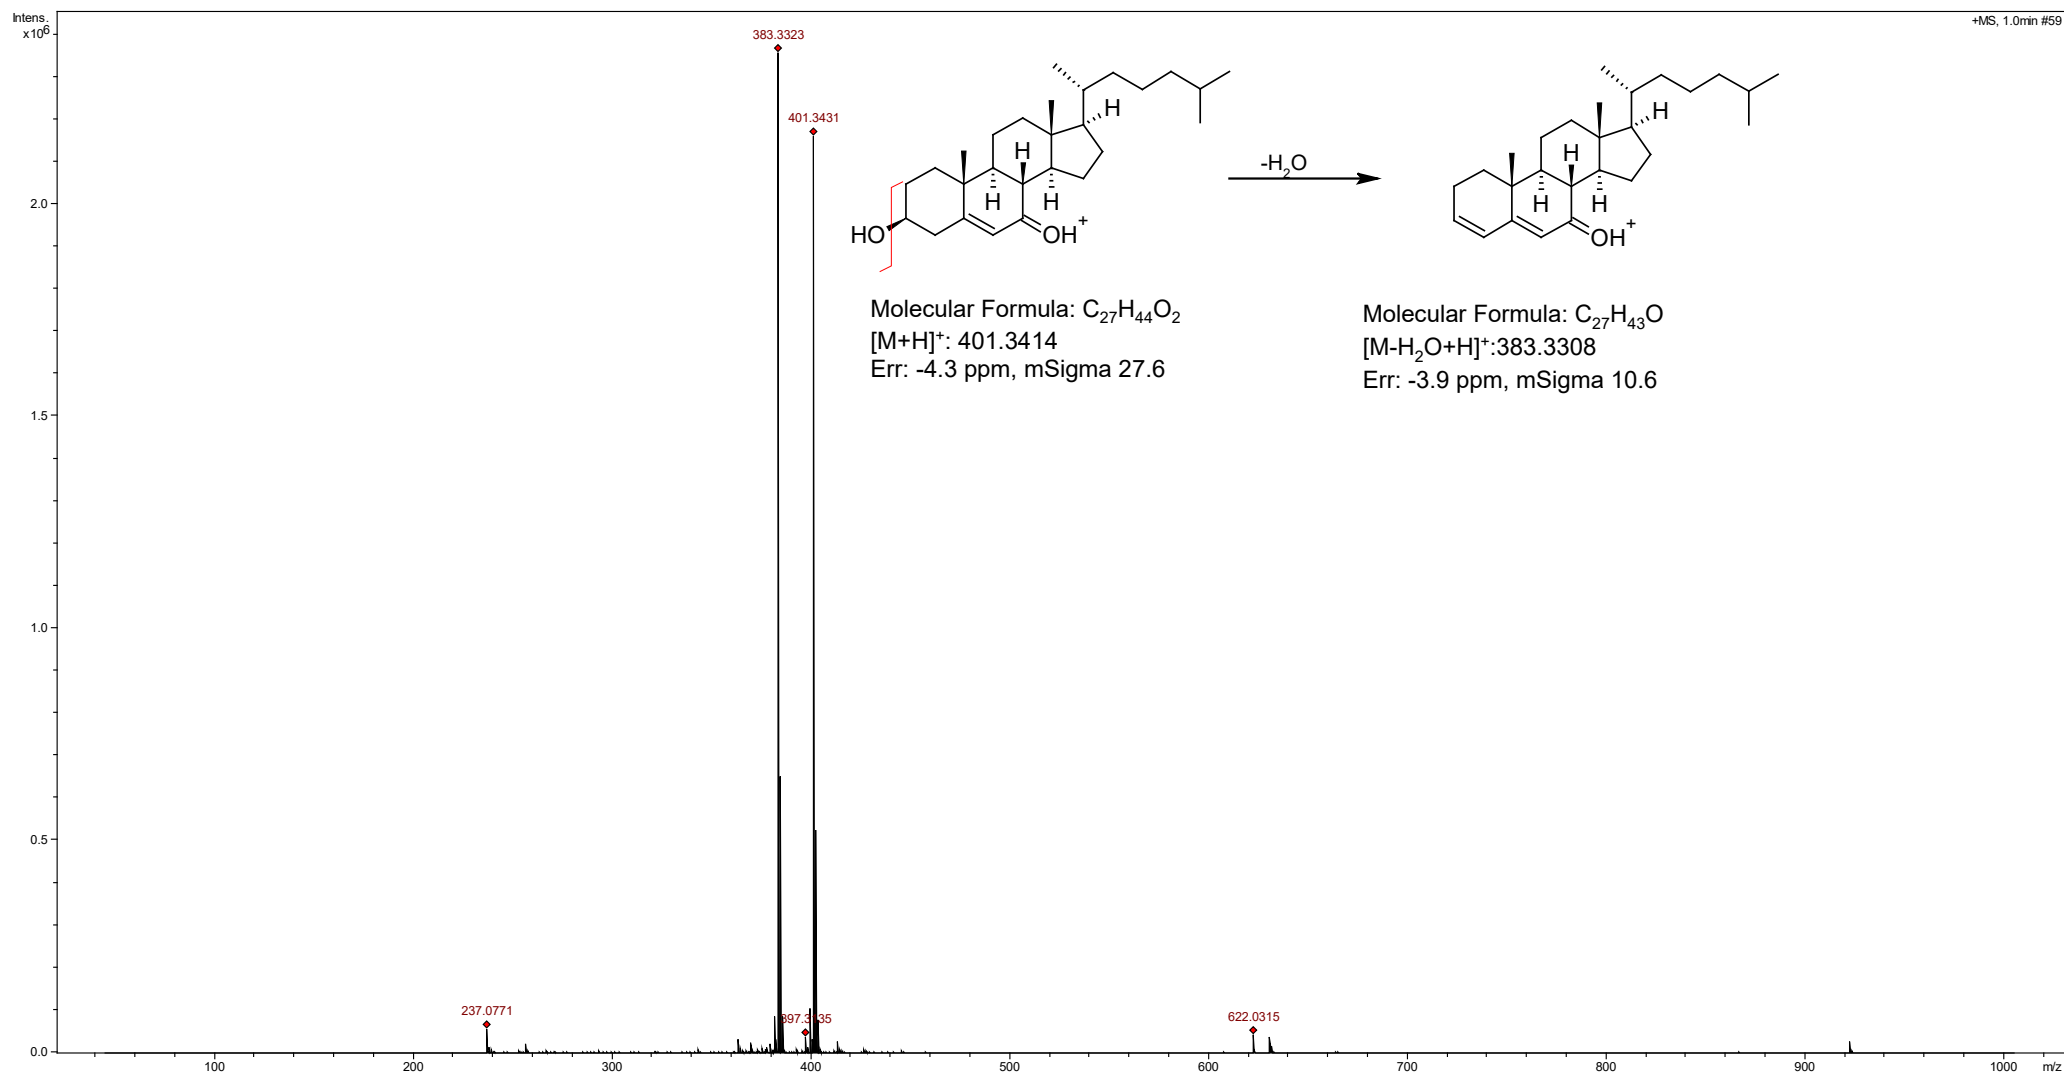

Figure S84. Mass spectrum of 5-cholesten-3 $\beta$ -ol-7-one (7-ketocholesterol) (**28**)

Pulse Sequence: PROTON (s2pul)  
 Solvent: cdcl3  
 Data collected on: Jan 10 2019

Temp. 25.0 C / 298.1 K  
 Operator: vnmr1

Relax. delay 0.001 sec  
 Pulse 33.8 degrees  
 Acq. time 4.000 sec  
 Width 5000.0 Hz  
 Single scan

OBSERVE H1, 599.8350651 MHz  
 DATA PROCESSING  
 Line broadening 0.1 Hz  
 FT size 131072  
 Total time 0 min 4 sec

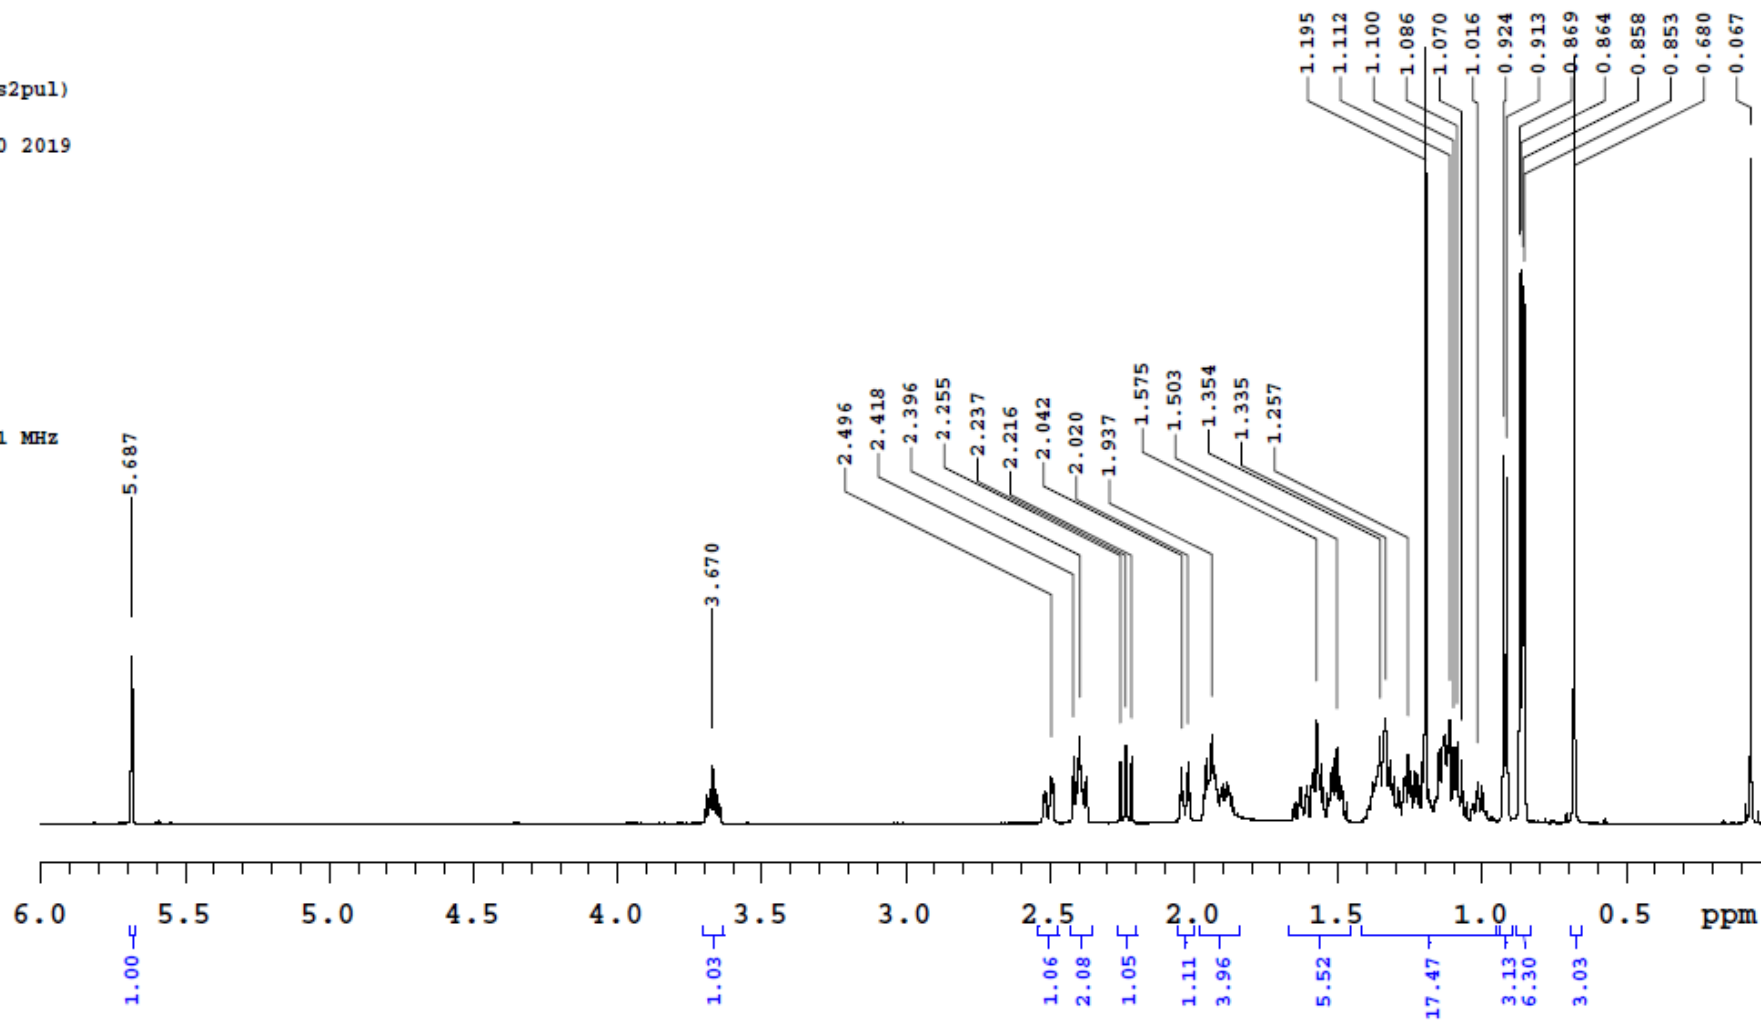

Figure S85. <sup>1</sup>H spectrum of 5-cholesten-3β-ol-7-one (7-ketocholesterol) (28) in CDCl<sub>3</sub>

Pulse Sequence: CARBON (s2pul)  
 Solvent: cdcl3  
 Data collected on: Jan 10 2019

Temp. 25.0 C / 298.1 K  
 Operator: vnmr1

Relax. delay 0.500 sec  
 Pulse 30.0 degrees  
 Acq. time 1.500 sec  
 Width 37878.8 Hz  
 256 repetitions

OBSERVE C13, 150.8286494 MHz  
 DECOUPLE H1, 599.8380734 MHz  
 Power 34 dB  
 continuously on  
 WALTZ-16 modulated

DATA PROCESSING  
 Line broadening 0.5 Hz  
 FT size 131072  
 Total time 11 hr, 6 min

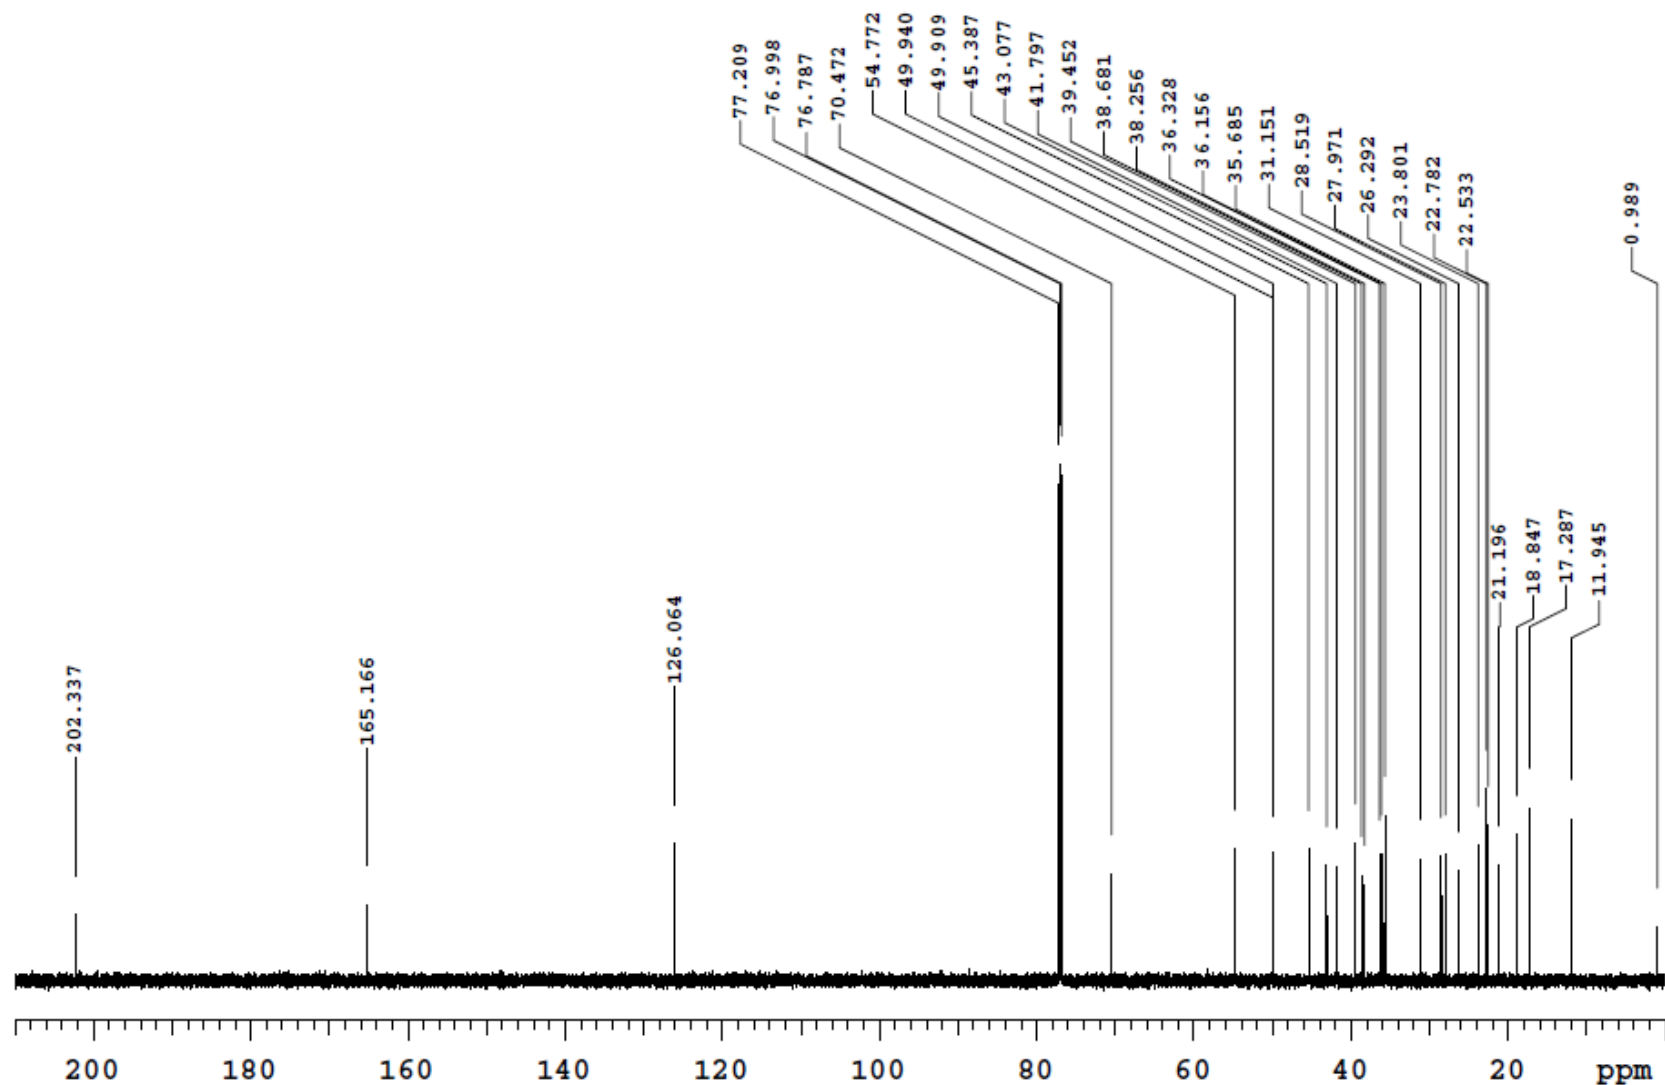

Figure S86. <sup>13</sup>C spectrum of 5-cholesten-3β-ol-7-one (7-ketocholesterol) (28) in CDCl<sub>3</sub>

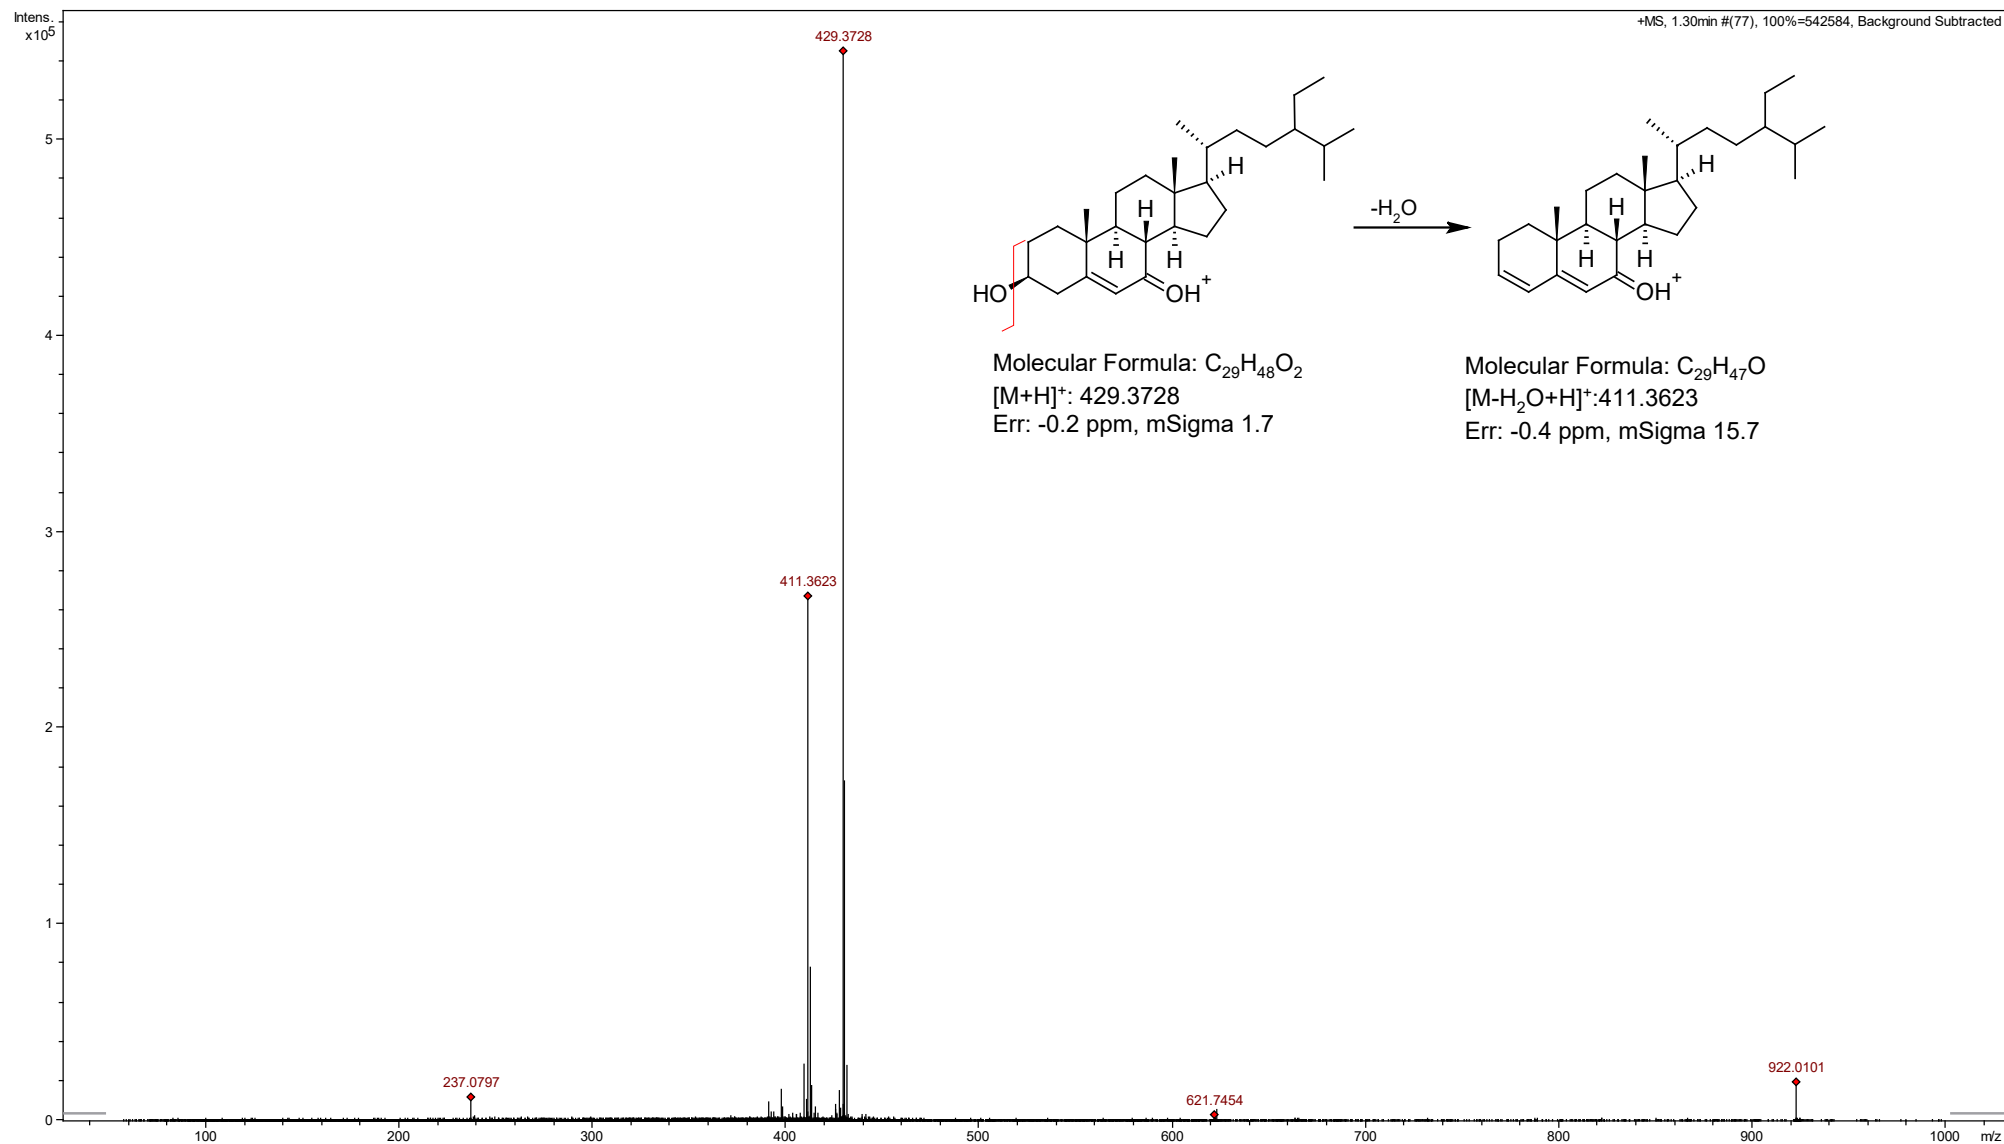

Figure S87. Mass spectrum of 5-sitosten-3β-ol-7-one (7-ketositosterol) (29)

Pulse Sequence: PROTON (s2pul)  
 Solvent: cdcl3  
 Data collected on: Sep 11 2019

Temp. 25.3 C / 298.4 K  
 Operator: vnmr1

Relax. delay 1.000 sec  
 Pulse 31.7 degrees  
 Acq. time 4.000 sec  
 Width 8012.8 Hz  
 32 repetitions  
 OBSERVE H1, 499.8026265 MHz  
 DATA PROCESSING  
 Line broadening 0.1 Hz  
 FT size 262144  
 Total time 2 min 40 sec

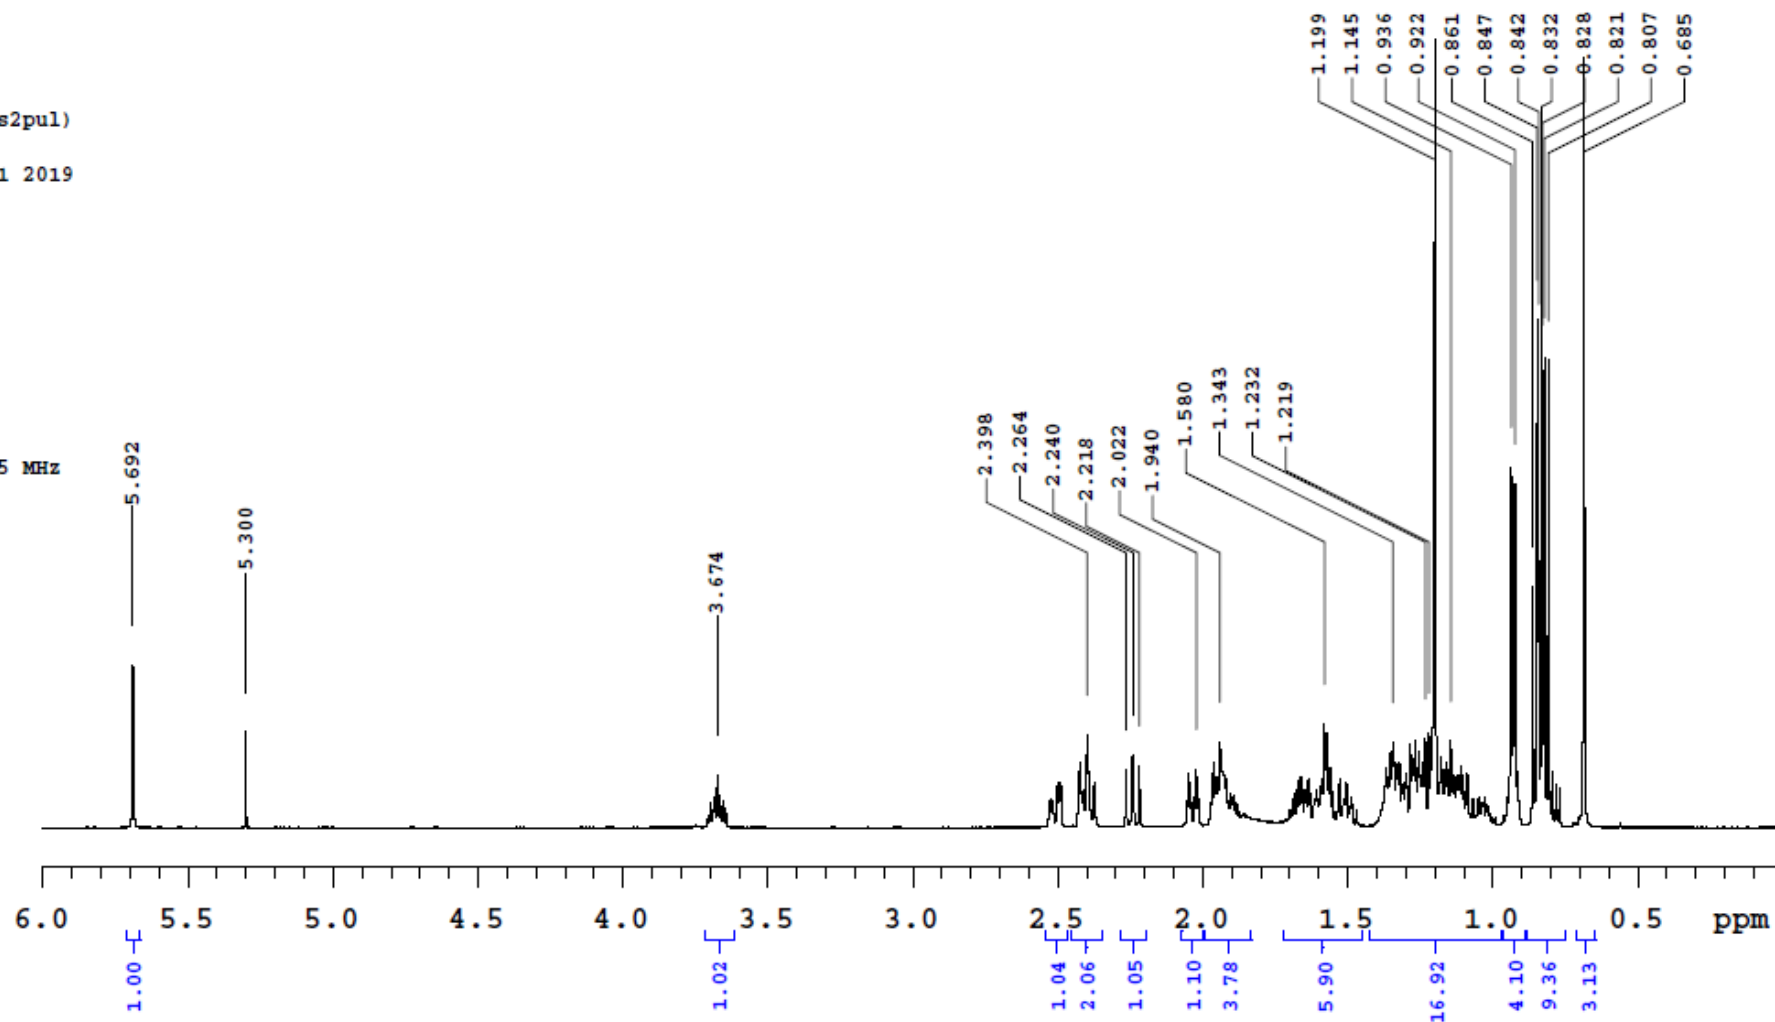

Figure S88.  $^1\text{H}$  spectrum of 5-sitosten-3 $\beta$ -ol-7-one (7-ketositosterol) (**29**) in  $\text{CDCl}_3$

Pulse Sequence: CARBON (s2pul)  
Solvent: cdcl3  
Data collected on: Sep 11 2019

Temp. 25.3 C / 298.4 K  
Operator: vnmr1

Relax. delay 0.500 sec  
Pulse 26.5 degrees  
Acq. time 1.022 sec  
Width 32051.3 Hz  
1360 repetitions  
OBSERVE C13, 125.6754712 MHz  
DECOUPLE H1, 499.8051288 MHz  
Power 36 dB  
continuously on  
WALTZ-16 modulated  
DATA PROCESSING  
Line broadening 1.0 Hz  
FT size 262144  
Total time 8 hr, 27 min

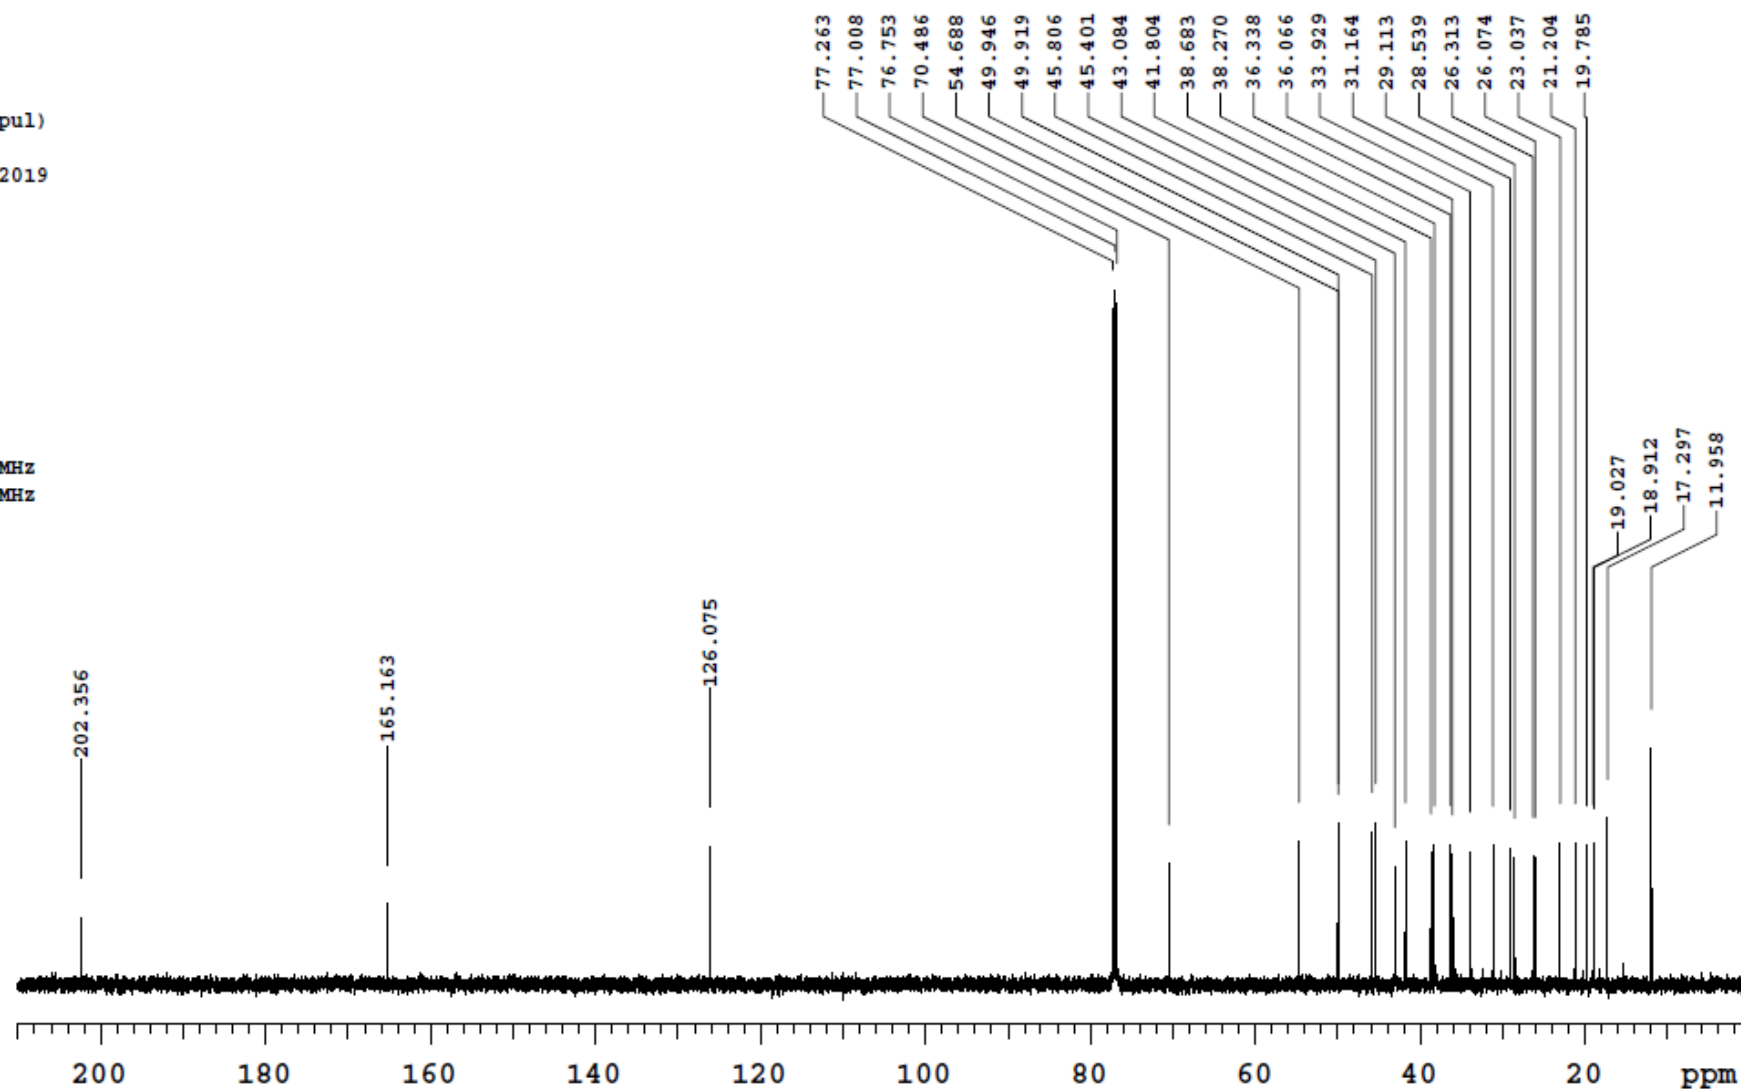

Figure S89. <sup>13</sup>C spectrum of 5-sitosten-3β-ol-7-one (7-ketositosterol) (29) in CDCl<sub>3</sub>

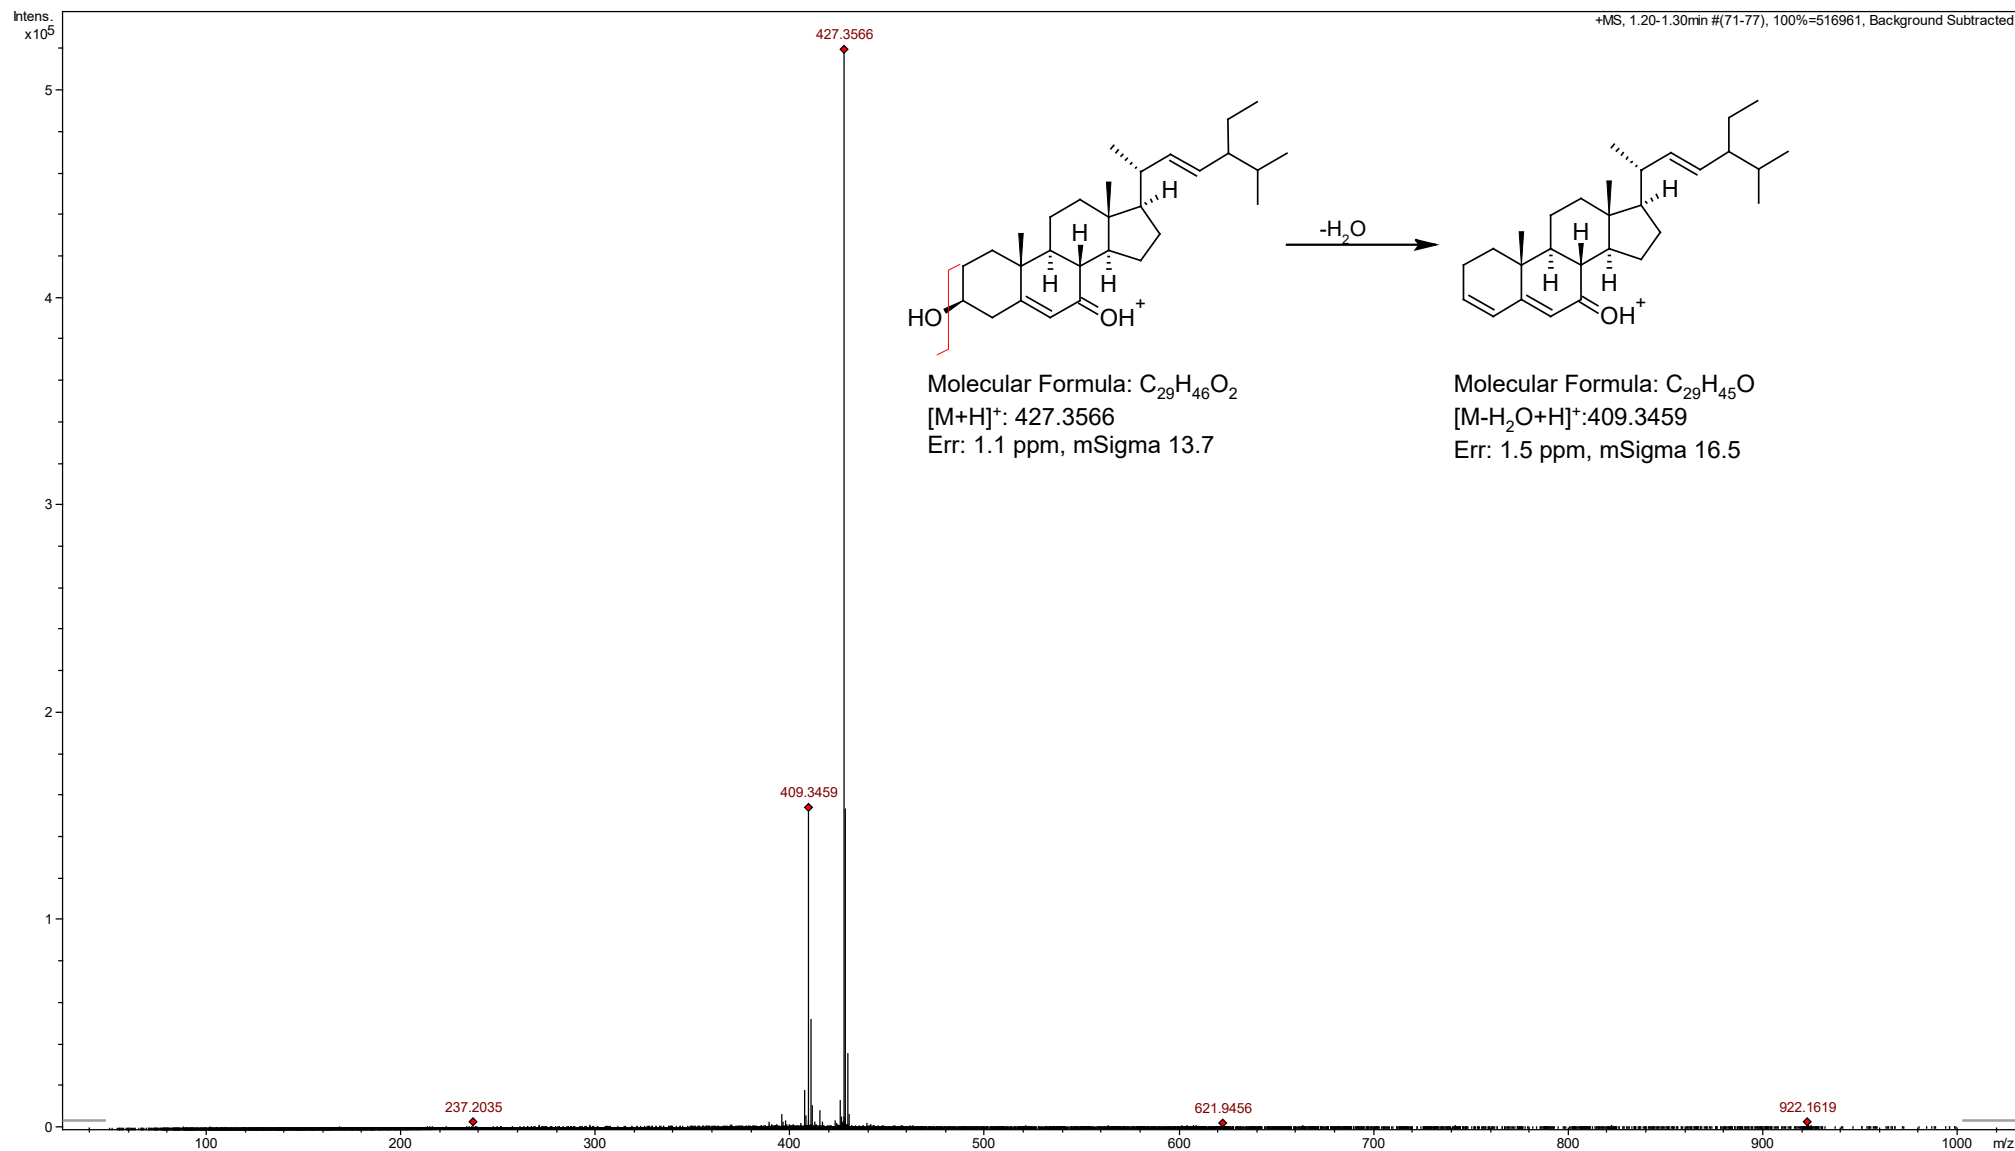

Figure S90. Mass spectrum of 5-stigmasten-3 $\beta$ -ol-7-one (7-ketostigmasterol) (**30**)

Pulse Sequence: PROTON (s2pul)  
 Solvent: cdcl3  
 Data collected on: Sep 11 2019

Temp. 25.3 C / 298.4 K  
 Operator: vnmr1

Relax. delay 1.000 sec  
 Pulse 31.7 degrees  
 Acq. time 4.000 sec  
 Width 8012.8 Hz  
 32 repetitions  
 OBSERVE H1, 499.8026262 MHz  
 DATA PROCESSING  
 Line broadening 0.1 Hz  
 FT size 262144  
 Total time 2 min 40 sec

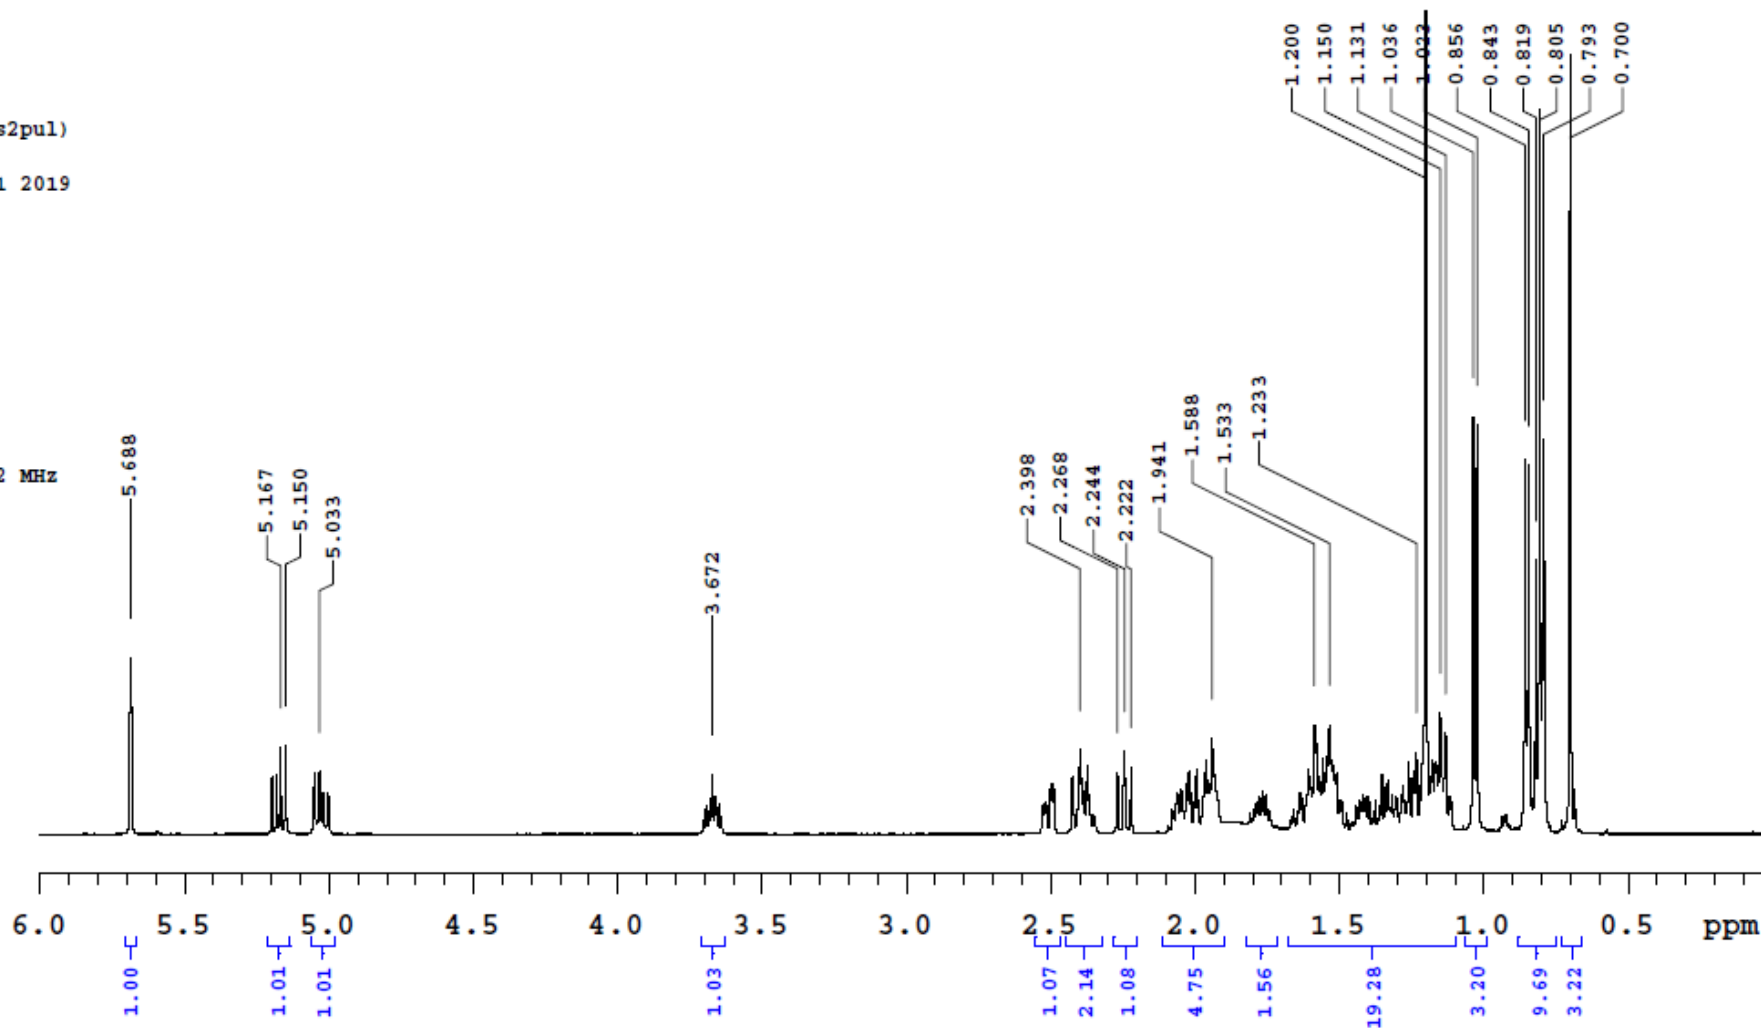

Figure S91. <sup>1</sup>H spectrum of 5-stigmasten-3β-ol-7-one (7-ketostigmasterol) (30) in CDCl<sub>3</sub>

Pulse Sequence: CARBON (s2pul)  
 Solvent: cdcl3  
 Data collected on: Sep 11 2019

Temp. 25.3 C / 298.4 K  
 Operator: vnmr1

Relax. delay 0.500 sec  
 Pulse 26.5 degrees  
 Acq. time 1.022 sec  
 Width 32051.3 Hz  
 960 repetitions

OBSERVE C13, 125.6754712 MHz  
 DECOUPLE H1, 499.8051288 MHz  
 Power 36 dB

continuously on  
 WALTZ-16 modulated

DATA PROCESSING  
 Line broadening 1.0 Hz  
 FT size 262144  
 Total time 8 hr, 27 min

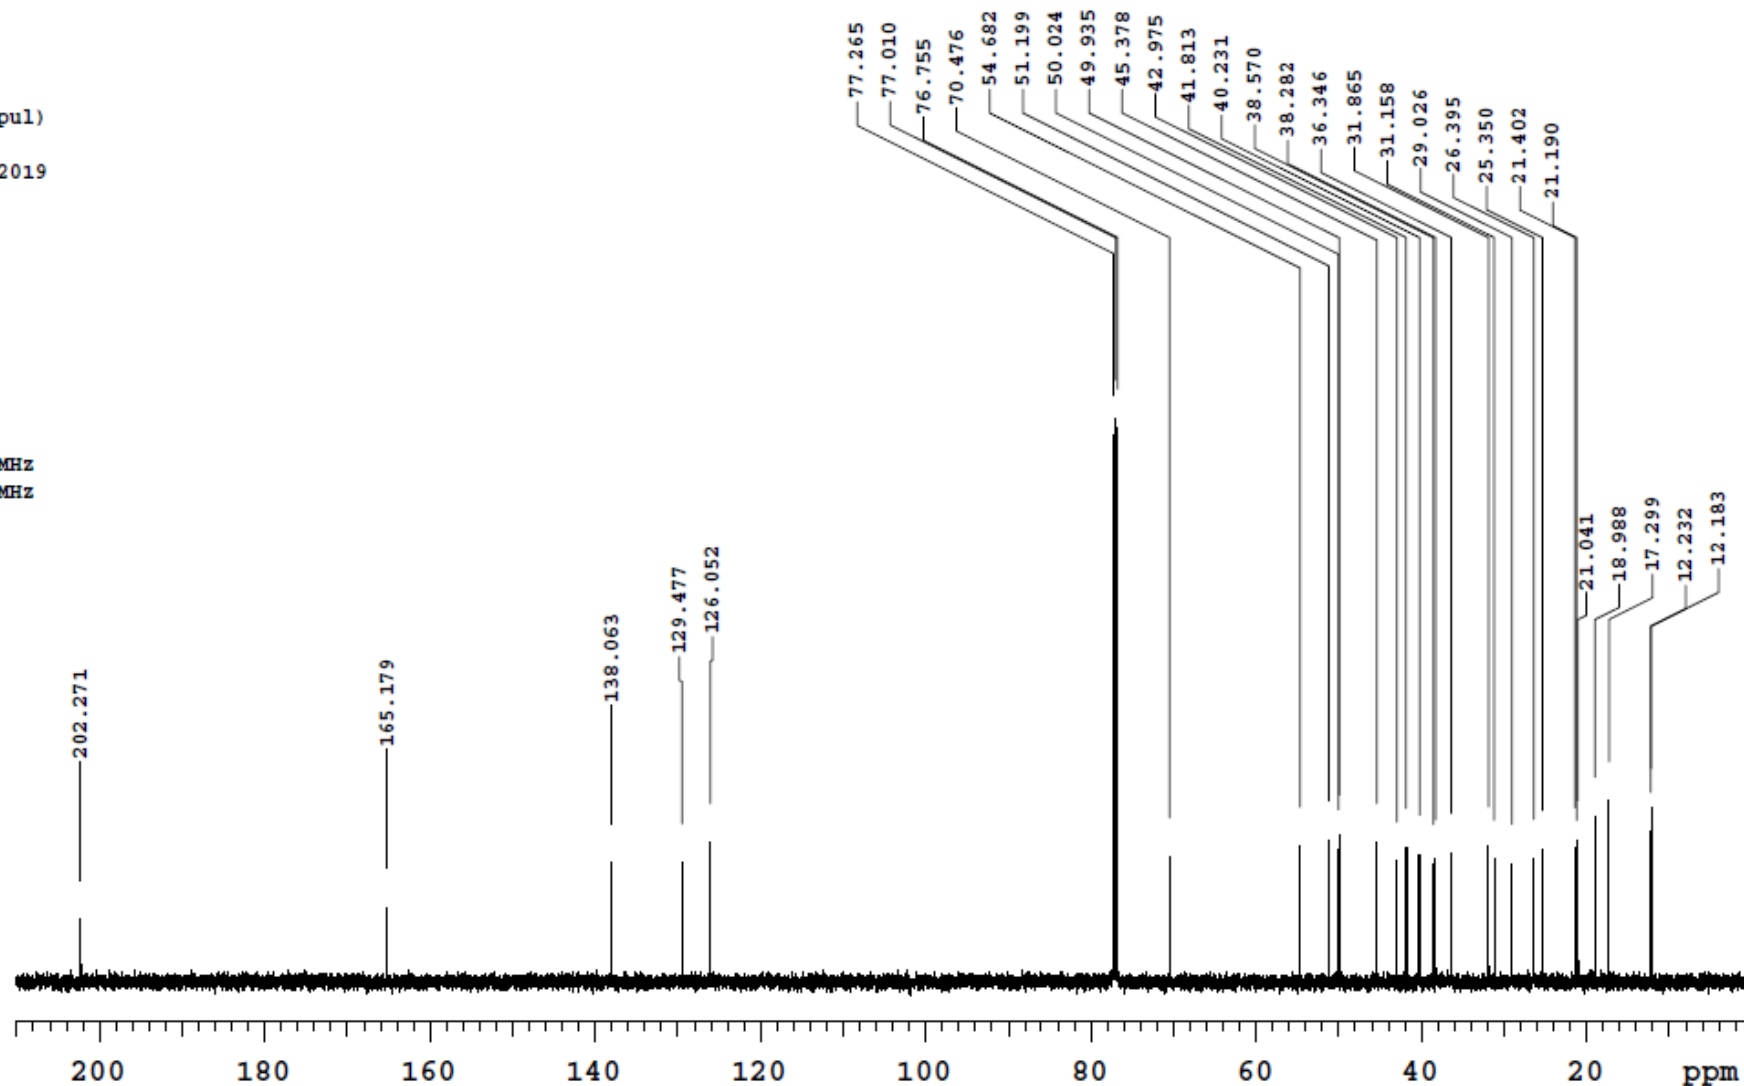

Figure S92. <sup>13</sup>C spectrum of 5-stigmasten-3β-ol-7-one (24) (7-ketostigmasterol) (**30**) in CDCl<sub>3</sub>

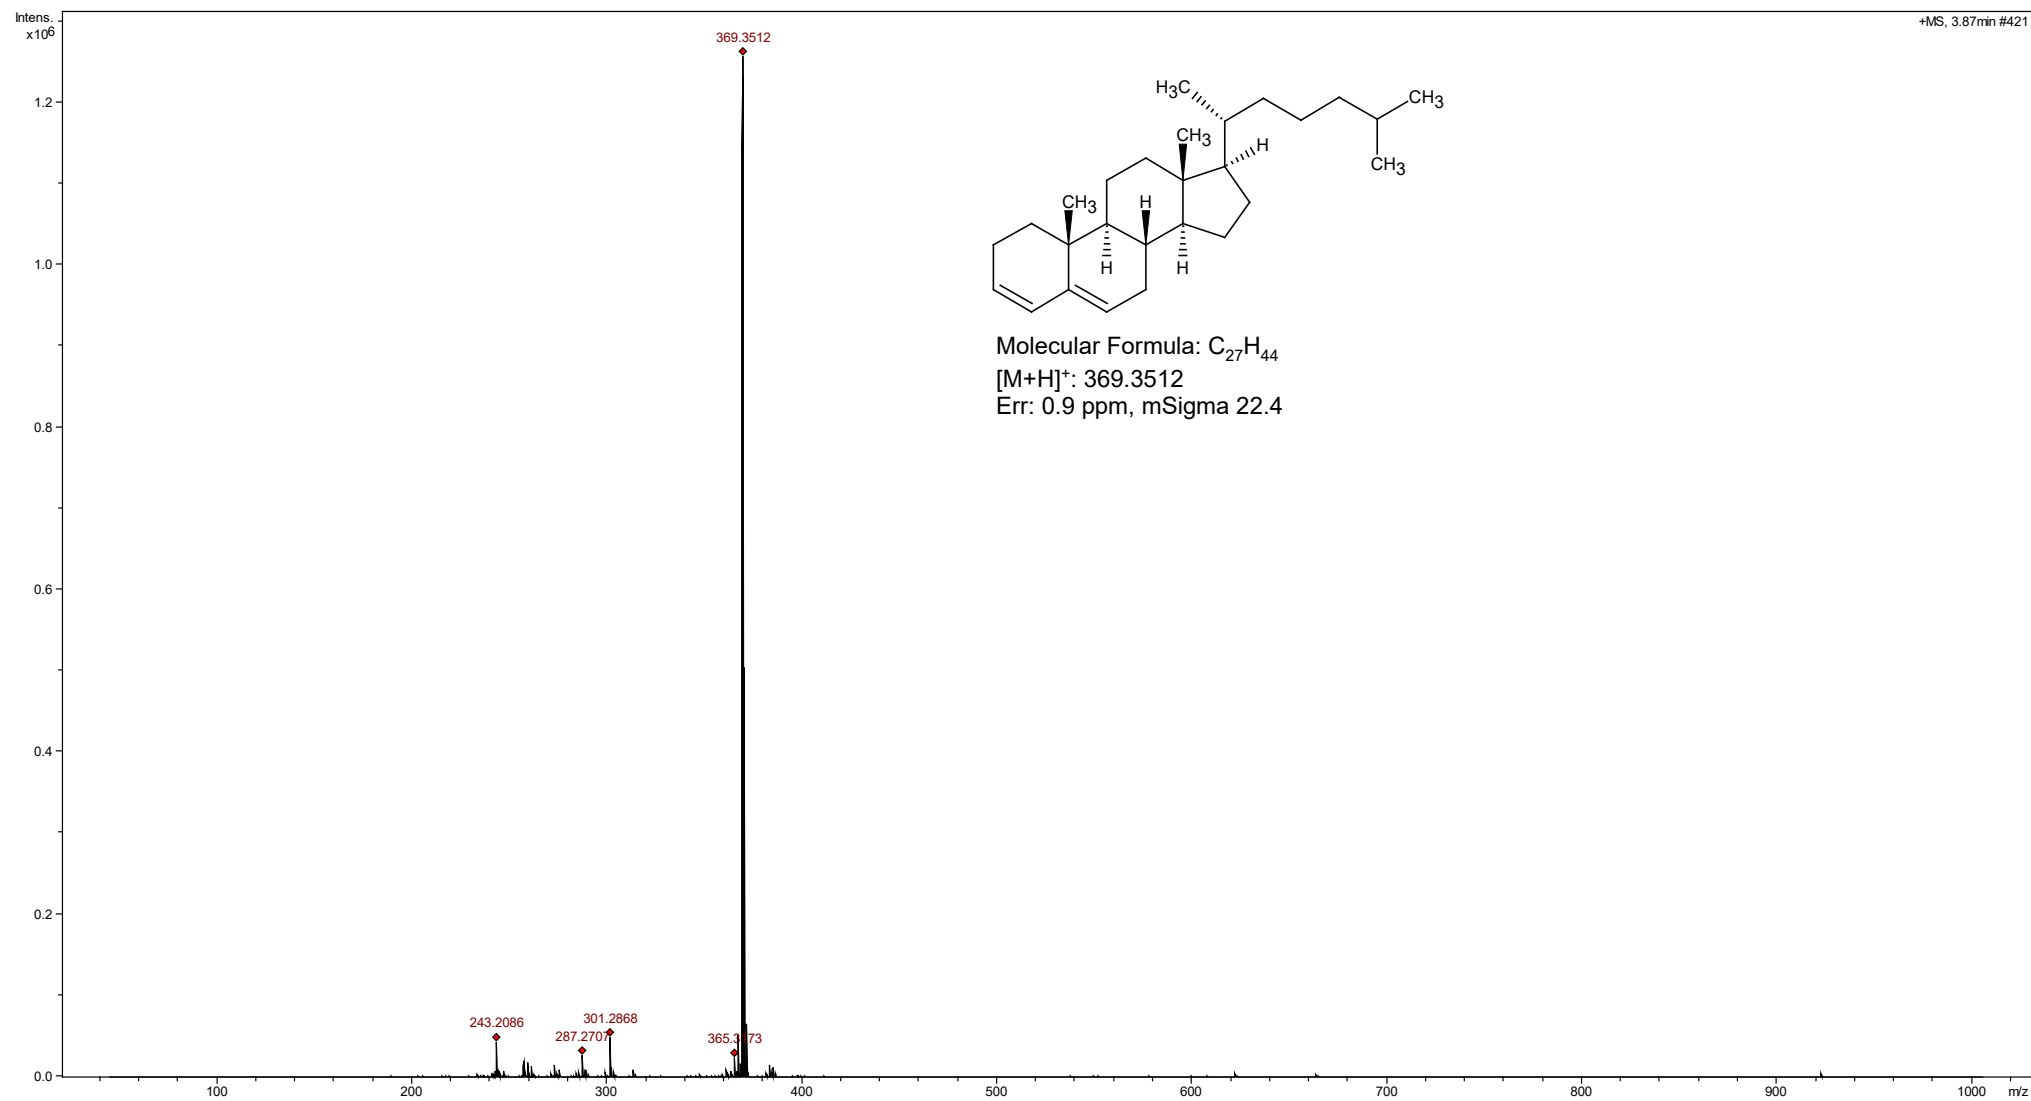

Figure S93. Mass spectrum of cholesta-3,5-diene (cholestadiene) (**31**)

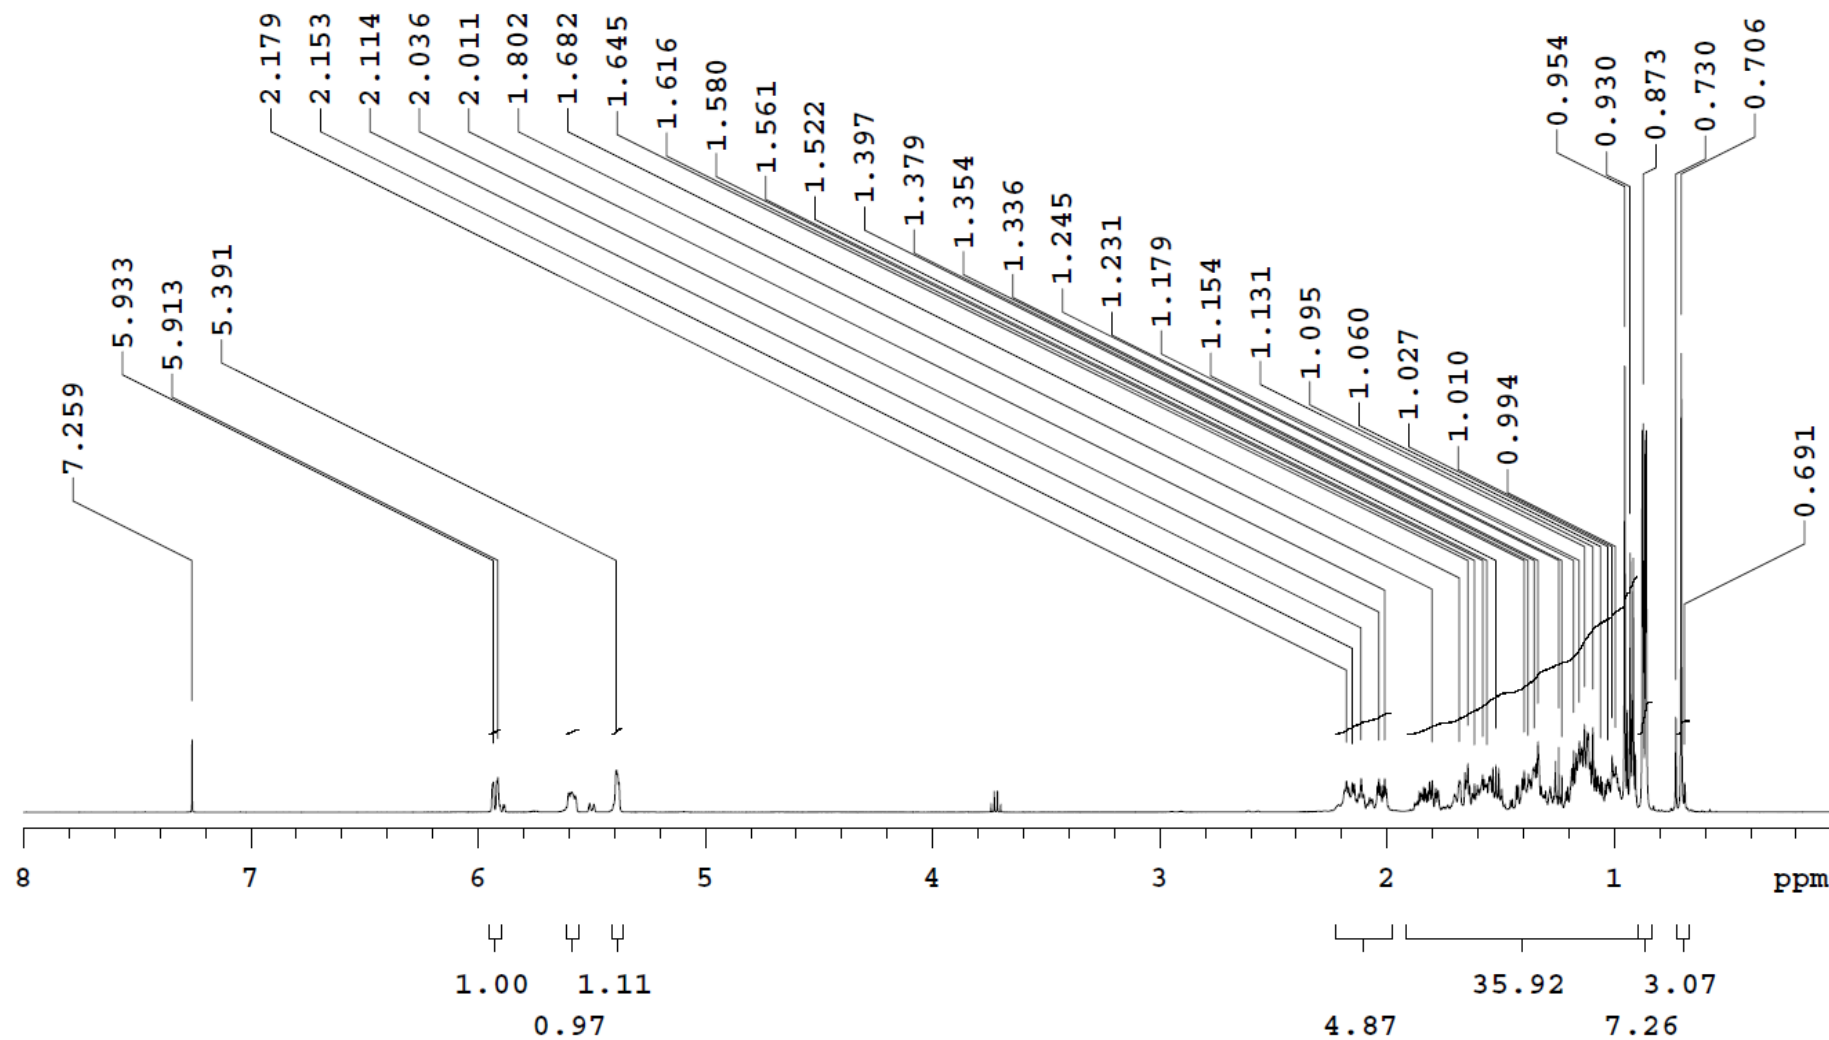

Figure S94. <sup>1</sup>H spectrum of cholesta-3,5-diene (cholestadiene) (**31**) in CDCl<sub>3</sub>

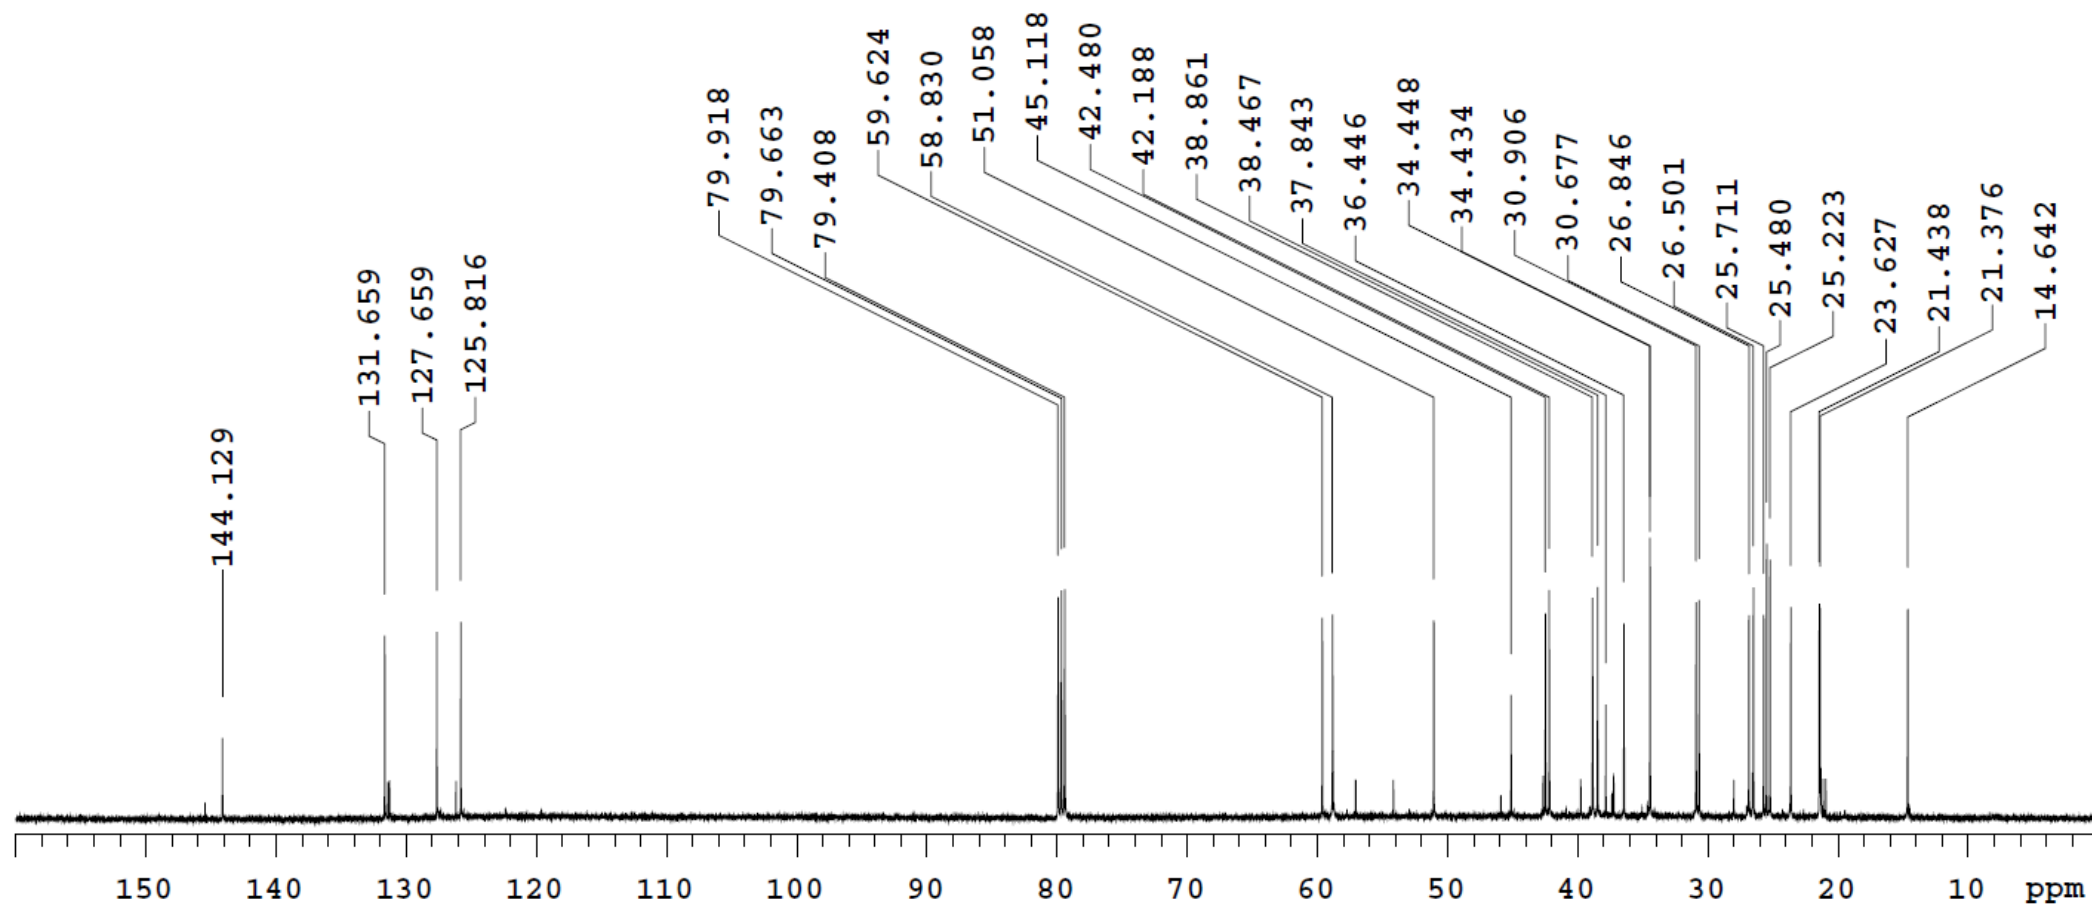

Figure S95.  $^1\text{H}$  spectrum of cholesta-3,5-diene (cholestadiene) (**31**) in  $\text{CDCl}_3$
